# Supplementary material for: Structure-guided design of CPPC-paired disulfide-rich peptide libraries for ligand and drug discovery
Source: Chem Sci. 2022 May 20;13(26):7780–9. doi: 10.1039/d2sc00924b (PMC9258321; doi:10.1039/d2sc00924b)
Supplement: SC-013-D2SC00924B-s001 [file SC-013-D2SC00924B-s001.xlsx]

## Sheet: Sheet1
Number	Sequence																			Abundance	Percentages
1	CPPC	A	S	G	C	S	P	E	T	G	E	F	C	W	R	E	D	D	CPPC	50661	0.536487
2	CPPC	R	T	R	C	D	R	E	T	G	E	R	C	H	L	A	Q	T	CPPC	20309	0.215067
3	CPPC	V	E	S	H	C	P	L	L	M	I	Y	C	A	E	T	G	E	CPPC	5375	0.0569199
4	CPPC	R	L	L	A	C	V	S	E	S	S	D	C	W	D	T	G	E	CPPC	1800	0.0190615
5	CPPC	C	P	T	E	C	S	T	A	E	T	C	M	E	T	G	E	R	CPPC	1732	0.0183414
6	CPPC	V	L	E	C	K	V	R	P	E	S	D	C	G	A	T	G	E	CPPC	1670	0.0176849
7	CPPC	T	A	S	C	R	D	V	E	T	G	E	C	E	R	R	Y	Q	CPPC	1461	0.0154716
8	CPPC	R	A	C	A	T	D	I	E	T	G	E	C	A	G	Q	E	R	CPPC	1428	0.0151222
9	CPPC	R	E	S	C	K	D	P	D	L	G	D	C	F	T	E	A	N	CPPC	814	0.00862005
10	CPPC	W	E	C	E	R	Q	T	D	C	D	T	G	E	L	M	S	F	CPPC	764	0.00809056
11	CPPC	R	E	A	G	C	T	A	H	T	T	C	D	L	E	L	G	E	CPPC	726	0.00768815
12	CPPC	R	E	T	Q	C	V	P	V	F	W	E	C	W	E	T	G	E	CPPC	569	0.00602556
13	CPPC	L	L	E	G	C	L	L	E	Y	W	D	C	S	A	T	G	E	CPPC	514	0.00544313
14	CPPC	S	R	R	G	C	E	A	L	T	A	C	A	E	T	G	E	T	CPPC	263	0.0027851
15	CPPC	K	D	I	D	C	S	D	M	G	R	C	D	T	D	E	Y	N	CPPC	236	0.00249918
16	CPPC	A	S	G	C	S	P	E	T	G	E	F	C	W	R	E	D	D	CPPC	176	0.00186379
17	CPPC	E	G	A	C	A	S	V	D	L	P	S	C	E	E	T	G	E	CPPC	172	0.00182144
18	CPPC	F	D	M	A	C	V	I	W	G	E	C	S	T	P	E	K	E	CPPC	152	0.00160964
19	CPPC	P	S	C	R	S	R	E	T	G	E	R	C	G	F	V	W	A	CPPC	137	0.00145079
20	CPPC	E	T	G	C	E	S	L	G	S	C	D	A	I	S	G	A	L	CPPC	102	0.00108015
21	CPPC	E	R	L	G	M	C	A	E	T	S	D	C	T	D	L	G	A	CPPC	96	0.00101662
22	CPPC	A	S	G	C	S	P	E	T	G	E	F	C	W	R	E	D	D	CPPC	79	0.00083659
23	CPPC	F	E	C	L	P	D	V	E	M	G	I	C	V	P	V	L	S	CPPC	77	0.00081541
24	CPPC	R	Q	A	L	C	D	E	E	S	G	E	C	P	Y	L	W	I	CPPC	76	0.00080482
25	CPPC	H	W	A	W	E	C	H	E	T	G	E	C	D	L	P	V	Y	CPPC	70	0.000741282
26	CPPC	A	S	G	C	S	P	E	T	G	E	F	C	W	R	S	D	D	CPPC	69	0.000730692
27	CPPC	R	T	R	C	D	R	E	T	G	E	R	C	H	L	A	Q	A	CPPC	58	0.000614205
28	CPPC	A	H	R	I	C	Y	P	P	G	G	G	C	C	T	E	A	E	CPPC	58	0.000614205
29	CPPC	A	R	G	C	S	P	E	T	G	E	F	C	W	R	E	D	D	CPPC	56	0.000593026
30	CPPC	A	S	G	C	S	P	E	T	G	E	F	C	W	R	E	D	N	CPPC	55	0.000582436
31	CPPC	A	S	G	C	S	P	E	A	G	E	F	C	W	R	E	D	D	CPPC	52	0.000550667
32	CPPC	R	R	E	C	L	P	D	V	W	T	D	C	M	E	M	G	I	CPPC	49	0.000518897
33	CPPC	G	L	M	C	G	Y	S	R	R	V	D	C	E	T	G	E	S	CPPC	47	0.000497718
34	CPPC	A	S	G	C	S	P	E	T	G	E	F	C	W	G	E	D	D	CPPC	46	0.000487128
35	CPPC	A	S	G	C	S	P	E	T	G	E	F	C	W	R	E	D	D	CPPC	45	0.000476538
36	CPPC	A	S	G	C	S	P	E	T	G	E	L	C	W	R	E	D	D	CPPC	43	0.000455359
37	CPPC	A	G	G	C	S	P	E	T	G	E	F	C	W	R	E	D	D	CPPC	43	0.000455359
38	CPPC	A	S	G	C	S	P	G	T	G	E	F	C	W	R	E	D	D	CPPC	41	0.000434179
39	CPPC	A	S	G	C	S	P	E	T	G	E	F	C	W	R	E	D	D	CPPC	40	0.00042359
40	CPPC	A	S	G	C	S	P	E	T	G	E	F	C	R	R	E	D	D	CPPC	40	0.00042359
41	CPPC	A	S	G	C	S	P	E	T	G	E	F	R	W	R	E	D	D	CPPC	39	0.000413
42	CPPC	A	S	G	C	S	P	E	T	G	E	F	C	W	R	E	D	D	CPPC	37	0.00039182
43	CPPC	A	S	G	C	S	P	E	T	G	K	F	C	W	R	E	D	D	CPPC	37	0.00039182
44	CPPC	A	S	G	C	S	P	E	T	G	E	F	C	W	R	E	G	D	CPPC	36	0.000381231
45	CPPC	A	S	G	C	P	P	E	T	G	E	F	C	W	R	E	D	D	CPPC	35	0.000370641
46	CPPC	A	S	G	C	S	P	E	T	G	E	F	C	W	R	E	D	D	CPPC	35	0.000370641
47	CPPC	A	S	G	C	S	P	E	T	G	E	F	C	W	R	W	D	D	CPPC	35	0.000370641
48	CPPC	G	T	R	C	D	R	E	T	G	E	R	C	H	L	A	Q	T	CPPC	35	0.000370641
49	CPPC	A	S	G	C	S	P	E	T	G	E	F	C	W	R	K	D	D	CPPC	34	0.000360051
50	CPPC	A	S	G	C	S	P	E	T	G	G	F	C	W	R	E	D	D	CPPC	34	0.000360051
51	CPPC	A	S	G	R	S	P	E	T	G	E	F	C	W	R	E	D	D	CPPC	33	0.000349462
52	CPPC	A	S	G	C	S	P	E	T	G	E	S	C	W	R	E	D	D	CPPC	32	0.000338872
53	CPPC	L	A	S	S	C	E	G	R	S	H	L	C	W	D	D	G	S	CPPC	31	0.000328282
54	CPPC	R	T	R	C	I	L	G	F	L	D	M	C	L	V	R	T	R	CPPC	30	0.000317692
55	CPPC	A	S	G	C	S	P	E	T	G	E	F	C	W	R	E	D	D	CPPC	30	0.000317692
56	CPPC	A	S	G	C	S	P	E	T	G	E	F	C	W	R	E	D	G	CPPC	29	0.000307103
57	CPPC	K	L	C	N	P	E	S	G	E	E	S	C	A	H	E	C	L	CPPC	28	0.000296513
58	CPPC	A	S	G	C	S	P	E	T	G	E	F	C	W	R	Q	D	D	CPPC	26	0.000275333
59	CPPC	A	S	G	C	S	P	E	T	G	E	F	C	W	R	E	D	D	CPPC	25	0.000264744
60	CPPC	A	S	G	C	S	P	E	T	G	E	F	C	W	R	E	D	D	CPPC	25	0.000264744
61	CPPC	A	S	G	C	S	P	E	T	G	E	F	C	W	R	E	D	D	CPPC	25	0.000264744
62	CPPC	A	S	G	C	S	P	E	T	G	E	F	C	W	R	E	D	D	CPPC	25	0.000264744
63	CPPC	R	T	R	C	D	R	E	T	G	E	R	C	H	L	A	Q	T	CPPC	24	0.000254154
64	CPPC	R	P	V	C	A	I	A	P	A	C	R	S	P	E	T	G	E	CPPC	24	0.000254154
65	CPPC	A	S	G	C	S	P	E	T	G	E	F	C	W	R	E	D	D	CPPC	24	0.000254154
66	CPPC	E	R	A	L	C	W	P	P	A	L	C	D	P	D	L	G	S	CPPC	24	0.000254154
67	CPPC	R	T	R	C	D	R	E	T	G	K	R	C	H	L	A	Q	T	CPPC	23	0.000243564
68	CPPC	R	A	R	C	D	R	E	T	G	E	R	C	H	L	A	Q	T	CPPC	23	0.000243564
69	CPPC	T	R	W	P	C	D	P	D	M	G	I	C	E	S	G	F	Y	CPPC	22	0.000232974
70	CPPC	A	S	G	C	S	P	E	T	G	E	F	C	W	R	E	D	D	CPPC	22	0.000232974
71	CPPC	A	S	G	C	S	P	E	T	G	E	F	C	W	R	E	D	D	CPPC	22	0.000232974
72	CPPC	A	S	G	C	L	P	E	T	G	E	F	C	W	R	E	D	D	CPPC	22	0.000232974
73	CPPC	A	S	G	C	S	P	E	T	G	E	F	C	W	R	E	D	D	CPPC	21	0.000222385
74	CPPC	A	S	G	C	S	P	E	T	G	E	F	C	W	R	E	D	D	CPPC	20	0.000211795
75	CPPC	R	T	R	C	D	R	E	T	G	E	R	R	H	L	A	Q	T	CPPC	20	0.000211795
76	CPPC	R	T	R	C	D	R	E	T	G	E	R	C	H	L	A	Q	T	CPPC	20	0.000211795
77	CPPC	E	E	C	P	S	L	N	N	C	A	Q	D	P	S	T	G	E	CPPC	20	0.000211795
78	CPPC	A	S	G	Y	S	P	E	T	G	E	F	C	W	R	E	D	D	CPPC	20	0.000211795
79	CPPC	A	S	G	C	S	P	E	T	G	E	F	C	E	R	E	D	D	CPPC	20	0.000211795
80	CPPC	A	S	G	C	S	P	E	T	G	E	F	C	W	K	E	D	D	CPPC	20	0.000211795
81	CPPC	R	T	R	C	G	R	E	T	G	E	R	C	H	L	A	Q	T	CPPC	19	0.000201205
82	CPPC	A	S	G	C	S	P	E	T	G	E	F	C	W	R	E	D	D	CPPC	19	0.000201205
83	CPPC	R	T	R	C	D	R	E	T	G	E	R	C	H	L	A	Q	T	CPPC	18	0.000190615
84	CPPC	R	T	R	C	D	R	E	T	G	E	R	C	H	L	T	Q	T	CPPC	18	0.000190615
85	CPPC	A	R	G	C	S	P	E	T	G	E	F	C	W	R	E	D	D	CPPC	18	0.000190615
86	CPPC	A	S	G	C	S	P	V	T	G	E	F	C	W	R	E	D	D	CPPC	18	0.000190615
87	CPPC	A	S	G	C	S	P	E	T	G	E	F	C	W	R	E	D	D	CPPC	18	0.000190615
88	CPPC	A	S	G	C	S	P	E	T	G	E	F	C	W	R	E	D	D	CPPC	18	0.000190615
89	CPPC	T	S	G	C	S	P	E	T	G	E	F	C	W	R	E	D	D	CPPC	17	0.000180026
90	CPPC	R	T	R	C	D	R	E	T	G	E	R	C	H	L	A	Q	T	CPPC	17	0.000180026
91	CPPC	R	T	R	C	D	R	E	A	G	E	R	C	H	L	A	Q	T	CPPC	17	0.000180026
92	CPPC	R	T	R	C	D	R	G	T	G	E	R	C	H	L	A	Q	T	CPPC	17	0.000180026
93	CPPC	P	A	L	C	E	D	I	D	L	G	V	C	S	H	V	F	E	CPPC	17	0.000180026
94	CPPC	A	S	G	C	S	P	K	T	G	E	F	C	W	R	E	D	D	CPPC	16	0.000169436
95	CPPC	A	S	G	C	S	P	E	T	R	E	F	C	W	R	E	D	D	CPPC	16	0.000169436
96	CPPC	A	S	G	C	S	P	E	T	G	E	F	C	W	R	E	D	D	CPPC	16	0.000169436
97	CPPC	A	S	G	C	S	P	E	T	G	E	F	C	W	W	E	D	D	CPPC	16	0.000169436
98	CPPC	A	S	G	C	S	P	E	S	G	E	F	C	W	R	E	D	D	CPPC	16	0.000169436
99	CPPC	A	S	G	C	S	S	E	T	G	E	F	C	W	R	E	D	D	CPPC	16	0.000169436
100	CPPC	V	E	S	H	C	P	L	L	M	S	Y	C	A	E	T	G	E	CPPC	16	0.000169436
101	CPPC	V	S	G	C	S	P	E	T	G	E	F	C	W	R	E	D	D	CPPC	16	0.000169436
102	CPPC	A	S	G	C	S	P	E	T	G	E	F	C	W	R	E	D	D	CPPC	16	0.000169436
103	CPPC	T	R	C	G	H	R	S	R	C	A	P	D	C	E	F	W	G	CPPC	15	0.000158846
104	CPPC	R	T	R	C	D	R	E	T	G	E	R	Y	H	L	A	Q	T	CPPC	15	0.000158846
105	CPPC	A	S	G	C	S	P	E	T	E	E	F	C	W	R	E	D	D	CPPC	15	0.000158846
106	CPPC	A	S	G	C	S	P	E	T	G	E	F	C	W	R	E	N	D	CPPC	15	0.000158846
107	CPPC	A	S	G	C	S	P	E	T	G	E	F	C	W	R	E	D	D	CPPC	15	0.000158846
108	CPPC	A	S	G	C	S	P	E	M	G	E	F	C	W	R	E	D	D	CPPC	15	0.000158846
109	CPPC	R	T	R	C	D	R	E	T	G	E	R	C	H	P	A	Q	T	CPPC	14	0.000148256
110	CPPC	R	T	R	C	D	R	E	T	G	E	R	C	H	L	A	Q	T	CPPC	14	0.000148256
111	CPPC	R	T	R	C	D	R	E	T	G	E	R	C	H	L	A	R	T	CPPC	14	0.000148256
112	CPPC	R	T	R	C	D	R	E	T	G	E	R	C	R	L	A	Q	T	CPPC	14	0.000148256
113	CPPC	R	T	R	C	D	R	E	T	G	E	G	C	H	L	A	Q	T	CPPC	14	0.000148256
114	CPPC	H	V	E	C	P	G	A	F	S	V	A	C	V	E	T	G	I	CPPC	14	0.000148256
115	CPPC	C	P	T	E	C	S	T	A	E	A	C	M	E	T	G	E	R	CPPC	14	0.000148256
116	CPPC	R	T	H	C	D	R	E	T	G	E	R	C	H	L	A	Q	T	CPPC	13	0.000137667
117	CPPC	R	T	R	R	D	R	E	T	G	E	R	C	H	L	A	Q	T	CPPC	13	0.000137667
118	CPPC	R	T	R	C	D	R	E	T	G	G	R	C	H	L	A	Q	T	CPPC	13	0.000137667
119	CPPC	A	R	G	C	S	P	E	T	G	E	F	C	W	R	E	D	D	CPPC	13	0.000137667
120	CPPC	G	T	W	C	P	K	V	Y	M	S	E	C	E	D	M	G	I	CPPC	13	0.000137667
121	CPPC	V	E	S	H	C	P	L	L	M	I	Y	C	A	E	A	G	E	CPPC	13	0.000137667
122	CPPC	R	R	G	C	E	V	W	R	C	F	I	C	S	E	H	V	S	CPPC	12	0.000127077
123	CPPC	A	S	E	C	S	P	E	T	G	E	F	C	W	R	E	D	D	CPPC	12	0.000127077
124	CPPC	A	S	G	C	S	P	E	T	G	E	F	C	W	R	E	D	D	CPPC	12	0.000127077
125	CPPC	A	S	G	C	S	P	E	T	G	E	F	C	*	R	E	D	D	CPPC	12	0.000127077
126	CPPC	A	S	G	C	S	P	E	T	G	E	F	C	W	R	*	D	D	CPPC	12	0.000127077
127	CPPC	A	S	G	C	S	P	E	T	G	E	F	C	W	R	E	D	D	CPPC	12	0.000127077
128	CPPC	A	S	G	C	S	P	E	T	G	V	F	C	W	R	E	D	D	CPPC	12	0.000127077
129	CPPC	L	P	L	C	C	D	A	A	S	G	E	C	L	E	G	G	N	CPPC	12	0.000127077
130	CPPC	R	T	R	C	D	R	E	T	G	E	R	C	H	L	A	Q	T	CPPC	12	0.000127077
131	CPPC	R	T	R	C	D	R	E	T	G	E	R	C	H	L	A	Q	T	CPPC	11	0.000116487
132	CPPC	R	T	R	C	D	R	E	T	G	E	R	C	H	L	A	Q	T	CPPC	11	0.000116487
133	CPPC	R	T	R	C	D	R	E	T	G	E	R	C	H	L	A	Q	T	CPPC	11	0.000116487
134	CPPC	R	T	R	C	D	R	E	T	G	E	R	C	Y	L	A	Q	T	CPPC	11	0.000116487
135	CPPC	Q	Q	C	Y	H	S	I	Y	C	E	Y	D	I	D	L	G	A	CPPC	11	0.000116487
136	CPPC	L	L	T	C	S	A	E	S	T	P	E	C	S	D	L	G	V	CPPC	11	0.000116487
137	CPPC	A	S	G	C	S	P	E	T	G	E	F	C	W	R	E	D	D	CPPC	11	0.000116487
138	CPPC	A	S	G	C	S	P	E	T	G	E	F	C	W	R	E	D	D	CPPC	11	0.000116487
139	CPPC	A	S	G	C	S	P	E	T	G	E	F	C	W	R	E	D	D	CPPC	11	0.000116487
140	CPPC	A	S	G	C	S	P	E	T	G	E	F	C	G	R	E	D	D	CPPC	11	0.000116487
141	CPPC	A	S	G	C	S	P	E	T	G	E	F	C	W	R	E	D	H	CPPC	11	0.000116487
142	CPPC	A	S	G	C	S	P	E	T	G	E	F	C	W	R	E	D	V	CPPC	11	0.000116487
143	CPPC	V	E	S	H	C	P	L	L	M	I	Y	C	A	E	T	G	E	CPPC	11	0.000116487
144	CPPC	E	H	M	C	F	S	V	L	H	Q	F	C	V	E	T	G	E	CPPC	11	0.000116487
145	CPPC	C	W	Q	C	S	E	D	D	S	L	D	C	E	E	L	G	V	CPPC	11	0.000116487
146	CPPC	K	T	R	C	D	R	E	T	G	E	R	C	H	L	A	Q	T	CPPC	10	0.000105897
147	CPPC	T	S	L	C	A	D	I	E	V	G	D	C	N	F	W	E	P	CPPC	10	0.000105897
148	CPPC	R	T	R	C	D	R	K	T	G	E	R	C	H	L	A	Q	T	CPPC	10	0.000105897
149	CPPC	R	T	R	C	D	R	E	T	G	E	R	C	H	L	A	Q	T	CPPC	10	0.000105897
150	CPPC	R	T	R	C	D	R	E	T	G	E	R	C	H	L	A	Q	T	CPPC	10	0.000105897
151	CPPC	A	N	G	C	S	P	E	T	G	E	F	C	W	R	E	D	D	CPPC	10	0.000105897
152	CPPC	A	S	G	C	S	P	E	T	G	E	C	C	W	R	E	D	D	CPPC	10	0.000105897
153	CPPC	A	S	G	C	S	P	E	T	G	E	F	C	W	R	E	V	D	CPPC	10	0.000105897
154	CPPC	A	S	G	C	S	L	E	T	G	E	F	C	W	R	E	D	D	CPPC	10	0.000105897
155	CPPC	V	L	E	C	K	V	R	P	E	A	D	C	G	A	T	G	E	CPPC	10	0.000105897
156	CPPC	V	E	S	H	C	P	L	L	R	I	Y	C	A	E	T	G	E	CPPC	10	0.000105897
157	CPPC	R	T	R	C	D	R	E	T	G	E	R	C	H	L	A	Q	T	CPPC	10	0.000105897
158	CPPC	R	T	R	C	D	R	E	T	G	E	R	C	H	L	A	Q	T	CPPC	9	9.53077e-05
159	CPPC	R	T	R	C	D	R	E	T	G	E	R	C	H	L	A	Q	T	CPPC	9	9.53077e-05
160	CPPC	R	T	R	C	D	R	E	T	G	E	R	C	H	L	A	Q	T	CPPC	9	9.53077e-05
161	CPPC	R	T	R	C	D	R	E	T	G	E	R	C	H	L	A	Q	S	CPPC	9	9.53077e-05
162	CPPC	R	T	R	C	D	R	E	T	G	E	R	C	H	L	V	Q	T	CPPC	9	9.53077e-05
163	CPPC	R	T	R	C	D	R	E	T	G	E	R	C	H	F	A	Q	T	CPPC	9	9.53077e-05
164	CPPC	R	T	R	C	D	R	E	T	G	E	R	C	H	L	A	Q	T	CPPC	9	9.53077e-05
165	CPPC	R	T	C	C	D	R	E	T	G	E	R	C	H	L	A	Q	T	CPPC	9	9.53077e-05
166	CPPC	M	V	D	C	E	W	S	E	M	D	G	C	S	T	G	E	G	CPPC	9	9.53077e-05
167	CPPC	I	I	H	C	C	A	S	H	G	S	S	C	D	V	A	S	N	CPPC	9	9.53077e-05
168	CPPC	A	S	R	C	S	P	E	T	G	E	F	C	W	R	E	D	D	CPPC	9	9.53077e-05
169	CPPC	A	S	G	C	T	P	E	T	G	E	F	C	W	R	E	D	D	CPPC	9	9.53077e-05
170	CPPC	A	S	G	C	S	P	E	T	G	E	F	C	W	R	E	D	D	CPPC	9	9.53077e-05
171	CPPC	A	C	G	C	S	P	E	T	G	E	F	C	W	R	E	D	D	CPPC	9	9.53077e-05
172	CPPC	V	E	S	H	C	P	L	L	M	I	Y	C	A	E	T	G	E	CPPC	9	9.53077e-05
173	CPPC	V	E	S	H	C	P	L	L	M	V	Y	C	A	E	T	G	E	CPPC	9	9.53077e-05
174	CPPC	S	S	G	C	S	P	E	T	G	E	F	C	W	R	E	D	D	CPPC	9	9.53077e-05
175	CPPC	A	S	G	C	S	P	E	T	G	E	F	C	W	R	E	D	D	CPPC	8	8.47179e-05
176	CPPC	R	T	R	C	D	R	E	T	G	E	R	C	H	L	A	Q	T	CPPC	8	8.47179e-05
177	CPPC	R	T	R	C	D	R	E	T	G	E	R	C	H	L	A	Q	T	CPPC	8	8.47179e-05
178	CPPC	R	T	R	C	D	R	E	T	G	E	R	C	H	L	A	L	T	CPPC	8	8.47179e-05
179	CPPC	R	T	R	C	D	R	E	T	G	E	R	C	H	L	S	Q	T	CPPC	8	8.47179e-05
180	CPPC	R	T	R	C	D	R	E	T	G	E	R	C	H	L	A	Q	T	CPPC	8	8.47179e-05
181	CPPC	R	T	R	C	D	R	E	T	G	E	F	C	W	R	E	D	D	CPPC	8	8.47179e-05
182	CPPC	R	T	R	C	D	R	E	T	G	E	R	C	H	L	A	Q	T	CPPC	8	8.47179e-05
183	CPPC	A	S	G	C	S	P	E	T	G	E	F	C	W	R	E	D	D	CPPC	8	8.47179e-05
184	CPPC	A	S	G	C	S	P	E	T	G	E	F	*	W	R	E	D	D	CPPC	8	8.47179e-05
185	CPPC	A	S	G	C	S	P	E	T	G	E	F	C	W	R	E	D	E	CPPC	8	8.47179e-05
186	CPPC	A	S	G	C	S	P	E	T	G	E	F	C	W	R	E	D	D	CPPC	8	8.47179e-05
187	CPPC	C	P	T	E	C	S	T	A	E	T	C	M	E	T	G	E	G	CPPC	8	8.47179e-05
188	CPPC	R	T	R	S	D	R	E	T	G	E	R	C	H	L	A	Q	T	CPPC	7	7.41282e-05
189	CPPC	R	T	R	C	D	Q	E	T	G	E	R	C	H	L	A	Q	T	CPPC	7	7.41282e-05
190	CPPC	R	T	R	C	D	R	E	T	G	E	R	C	H	L	A	Q	T	CPPC	7	7.41282e-05
191	CPPC	R	T	R	C	D	R	E	T	G	E	R	C	H	L	A	Q	T	CPPC	7	7.41282e-05
192	CPPC	R	T	R	C	D	R	E	T	G	E	R	C	H	L	A	Q	T	CPPC	7	7.41282e-05
193	CPPC	R	T	R	C	D	R	E	T	G	E	R	C	H	L	A	Q	T	CPPC	7	7.41282e-05
194	CPPC	R	T	R	C	D	W	E	T	G	E	R	C	H	L	A	Q	T	CPPC	7	7.41282e-05
195	CPPC	R	T	R	C	V	R	E	T	G	E	R	C	H	L	A	Q	T	CPPC	7	7.41282e-05
196	CPPC	R	L	L	A	C	A	S	*	S	S	D	C	W	D	T	G	E	CPPC	7	7.41282e-05
197	CPPC	H	D	A	C	Y	P	L	C	S	D	G	C	E	D	T	G	E	CPPC	7	7.41282e-05
198	CPPC	R	I	E	C	L	I	T	L	Y	S	A	C	Q	G	P	N	W	CPPC	7	7.41282e-05
199	CPPC	A	S	G	C	S	P	E	T	G	E	L	C	W	R	E	D	D	CPPC	7	7.41282e-05
200	CPPC	A	S	G	C	S	P	E	T	G	E	F	C	W	R	E	D	D	CPPC	7	7.41282e-05
201	CPPC	A	S	G	C	S	P	E	T	G	E	F	C	W	R	Y	D	D	CPPC	7	7.41282e-05
202	CPPC	A	S	G	C	S	P	E	T	G	E	F	W	W	R	E	D	D	CPPC	7	7.41282e-05
203	CPPC	V	E	S	H	C	P	L	P	M	I	Y	C	A	E	T	G	E	CPPC	7	7.41282e-05
204	CPPC	V	E	S	H	C	P	L	L	M	I	Y	C	A	E	T	G	K	CPPC	7	7.41282e-05
205	CPPC	R	T	R	C	D	R	E	T	G	E	R	C	H	L	A	Q	T	CPPC	7	7.41282e-05
206	CPPC	R	T	R	C	D	R	E	T	G	E	R	C	H	L	A	Q	T	CPPC	6	6.35385e-05
207	CPPC	R	T	R	C	D	R	E	T	G	E	R	C	H	H	A	Q	T	CPPC	6	6.35385e-05
208	CPPC	R	L	L	A	C	V	S	*	S	A	D	C	W	D	T	G	E	CPPC	6	6.35385e-05
209	CPPC	R	E	S	C	K	D	P	D	L	R	D	C	F	T	E	A	N	CPPC	6	6.35385e-05
210	CPPC	R	L	T	C	T	C	R	M	V	P	E	C	L	C	Y	F	W	CPPC	6	6.35385e-05
211	CPPC	A	S	G	C	S	P	E	T	G	E	F	C	W	R	E	D	D	CPPC	6	6.35385e-05
212	CPPC	A	S	G	S	S	P	E	T	G	E	F	C	W	R	E	D	D	CPPC	6	6.35385e-05
213	CPPC	A	S	G	C	S	P	E	T	G	E	V	C	W	R	E	D	D	CPPC	6	6.35385e-05
214	CPPC	A	S	G	C	S	P	E	T	G	E	F	S	W	R	E	D	D	CPPC	6	6.35385e-05
215	CPPC	A	S	G	C	S	P	E	T	G	E	F	Y	W	R	E	D	D	CPPC	6	6.35385e-05
216	CPPC	A	S	G	C	S	P	E	T	G	E	F	C	W	R	E	A	D	CPPC	6	6.35385e-05
217	CPPC	A	S	G	C	S	P	E	T	W	E	F	C	W	R	E	D	D	CPPC	6	6.35385e-05
218	CPPC	A	S	V	C	S	P	E	T	G	E	F	C	W	R	E	D	D	CPPC	6	6.35385e-05
219	CPPC	A	S	W	C	S	P	E	T	G	E	F	C	W	R	E	D	D	CPPC	6	6.35385e-05
220	CPPC	V	E	S	H	C	P	L	L	M	I	Y	C	A	E	T	G	E	CPPC	6	6.35385e-05
221	CPPC	V	E	S	H	C	P	L	L	M	I	Y	C	A	E	T	G	E	CPPC	6	6.35385e-05
222	CPPC	V	E	S	H	C	P	L	L	M	I	Y	C	A	E	T	G	G	CPPC	6	6.35385e-05
223	CPPC	V	R	P	S	C	L	E	T	G	E	R	C	G	C	E	W	I	CPPC	6	6.35385e-05
224	CPPC	E	V	G	C	Y	R	L	D	S	T	E	C	V	E	V	G	D	CPPC	6	6.35385e-05
225	CPPC	W	E	C	W	R	Q	T	D	C	D	T	G	E	L	M	S	F	CPPC	6	6.35385e-05
226	CPPC	V	E	S	H	C	P	L	L	M	I	Y	C	A	E	T	G	E	CPPC	5	5.29487e-05
227	CPPC	R	T	R	*	D	R	E	T	G	E	R	C	H	L	A	Q	T	CPPC	5	5.29487e-05
228	CPPC	R	T	R	C	E	R	E	T	G	E	R	C	H	L	A	Q	T	CPPC	5	5.29487e-05
229	CPPC	R	T	R	C	D	R	E	T	G	E	R	C	H	L	A	Q	T	CPPC	5	5.29487e-05
230	CPPC	R	T	R	C	D	R	E	T	G	E	K	C	H	L	A	Q	T	CPPC	5	5.29487e-05
231	CPPC	R	T	R	C	D	R	E	T	G	E	R	S	H	L	A	Q	T	CPPC	5	5.29487e-05
232	CPPC	R	T	R	C	D	R	E	T	G	E	R	C	H	L	A	E	T	CPPC	5	5.29487e-05
233	CPPC	R	T	R	C	Y	R	E	T	G	E	R	C	H	L	A	Q	T	CPPC	5	5.29487e-05
234	CPPC	R	L	L	A	C	V	S	*	S	S	D	C	W	D	A	G	E	CPPC	5	5.29487e-05
235	CPPC	S	L	T	V	C	A	E	T	G	E	V	C	T	S	E	F	Q	CPPC	5	5.29487e-05
236	CPPC	H	E	C	P	V	D	F	L	E	V	S	C	L	V	A	A	A	CPPC	5	5.29487e-05
237	CPPC	R	T	R	C	D	R	E	T	G	E	R	C	H	L	A	Q	T	CPPC	5	5.29487e-05
238	CPPC	A	S	G	C	S	P	E	T	G	E	F	C	W	R	E	D	D	CPPC	5	5.29487e-05
239	CPPC	A	S	G	*	S	P	E	T	G	E	F	C	W	R	E	D	D	CPPC	5	5.29487e-05
240	CPPC	A	S	G	C	S	P	E	T	G	E	L	C	W	R	E	D	D	CPPC	5	5.29487e-05
241	CPPC	A	S	G	C	S	P	E	T	G	E	F	C	R	R	E	D	D	CPPC	5	5.29487e-05
242	CPPC	A	S	G	C	S	P	E	T	G	E	F	C	W	R	E	D	D	CPPC	5	5.29487e-05
243	CPPC	A	S	G	C	S	P	E	T	G	E	F	C	C	R	E	D	D	CPPC	5	5.29487e-05
244	CPPC	A	S	G	C	S	P	E	T	G	E	F	F	W	R	E	D	D	CPPC	5	5.29487e-05
245	CPPC	A	S	G	C	S	P	E	T	G	D	F	C	W	R	E	D	D	CPPC	5	5.29487e-05
246	CPPC	A	S	G	C	S	P	E	T	V	E	F	C	W	R	E	D	D	CPPC	5	5.29487e-05
247	CPPC	A	S	G	C	S	P	E	T	G	E	R	C	H	L	A	Q	T	CPPC	5	5.29487e-05
248	CPPC	A	S	G	C	S	P	E	T	G	E	F	C	W	R	E	D	D	CPPC	5	5.29487e-05
249	CPPC	A	S	G	F	S	P	E	T	G	E	F	C	W	R	E	D	D	CPPC	5	5.29487e-05
250	CPPC	A	M	E	C	R	S	E	P	V	N	G	C	F	A	E	V	V	CPPC	5	5.29487e-05
251	CPPC	V	L	E	R	K	V	R	P	E	S	D	C	G	A	T	G	E	CPPC	5	5.29487e-05
252	CPPC	V	L	E	C	K	A	R	P	E	S	D	C	G	A	T	G	E	CPPC	5	5.29487e-05
253	CPPC	V	L	E	C	K	V	R	P	G	S	D	C	G	A	T	G	E	CPPC	5	5.29487e-05
254	CPPC	V	E	P	H	C	P	L	L	M	I	Y	C	A	E	T	G	E	CPPC	5	5.29487e-05
255	CPPC	V	E	S	H	C	P	P	L	M	I	Y	C	A	E	T	G	E	CPPC	5	5.29487e-05
256	CPPC	V	E	S	H	C	P	L	L	M	I	Y	C	A	E	T	G	E	CPPC	5	5.29487e-05
257	CPPC	V	E	S	H	C	P	L	L	M	I	Y	C	A	E	T	G	E	CPPC	5	5.29487e-05
258	CPPC	V	E	S	H	C	L	L	L	M	I	Y	C	A	E	T	G	E	CPPC	5	5.29487e-05
259	CPPC	V	W	S	H	C	P	L	L	M	I	Y	C	A	E	T	G	E	CPPC	5	5.29487e-05
260	CPPC	E	S	M	C	F	E	A	G	D	A	E	C	E	A	T	G	E	CPPC	5	5.29487e-05
261	CPPC	S	C	C	E	D	G	T	E	C	P	E	S	C	G	L	C	A	CPPC	5	5.29487e-05
262	CPPC	C	P	T	E	C	S	T	A	E	T	C	M	E	A	G	E	R	CPPC	5	5.29487e-05
263	CPPC	V	E	S	H	C	P	L	L	M	I	Y	C	A	E	T	G	E	CPPC	5	5.29487e-05
264	CPPC	V	E	S	H	C	P	L	L	M	I	Y	C	A	E	T	G	E	CPPC	4	4.2359e-05
265	CPPC	T	A	S	C	R	D	V	E	T	G	E	C	E	R	R	Y	Q	CPPC	4	4.2359e-05
266	CPPC	R	T	R	C	D	R	E	T	G	E	R	C	H	L	A	Q	T	CPPC	4	4.2359e-05
267	CPPC	R	T	R	C	D	R	E	T	G	Q	R	C	H	L	A	Q	T	CPPC	4	4.2359e-05
268	CPPC	R	T	R	C	D	R	E	T	G	E	R	C	H	L	A	Q	T	CPPC	4	4.2359e-05
269	CPPC	R	T	R	C	D	R	E	T	G	E	R	C	H	L	A	R	T	CPPC	4	4.2359e-05
270	CPPC	R	T	R	C	D	R	E	T	G	E	R	C	H	L	A	Q	M	CPPC	4	4.2359e-05
271	CPPC	R	T	R	C	D	R	E	S	G	E	R	C	H	L	A	Q	T	CPPC	4	4.2359e-05
272	CPPC	R	T	L	C	D	R	E	T	G	E	R	C	H	L	A	Q	T	CPPC	4	4.2359e-05
273	CPPC	R	L	L	A	C	V	S	R	S	S	D	C	W	D	T	G	E	CPPC	4	4.2359e-05
274	CPPC	R	L	L	A	C	V	S	*	S	S	D	S	W	D	T	G	E	CPPC	4	4.2359e-05
275	CPPC	R	L	L	A	C	V	S	*	G	S	D	C	W	D	T	G	E	CPPC	4	4.2359e-05
276	CPPC	P	S	C	R	S	R	E	T	G	E	R	C	G	V	V	W	A	CPPC	4	4.2359e-05
277	CPPC	P	S	G	C	S	P	E	T	G	E	F	C	W	R	E	D	D	CPPC	4	4.2359e-05
278	CPPC	P	Y	S	R	C	R	E	L	V	V	A	C	V	W	R	R	C	CPPC	4	4.2359e-05
279	CPPC	R	A	C	A	T	D	I	E	T	G	E	C	A	G	E	E	R	CPPC	4	4.2359e-05
280	CPPC	R	E	A	G	C	T	A	H	T	T	C	D	L	E	L	G	E	CPPC	4	4.2359e-05
281	CPPC	R	E	A	G	C	T	A	H	T	T	C	D	L	E	V	G	E	CPPC	4	4.2359e-05
282	CPPC	A	E	S	H	C	P	L	L	M	I	Y	C	A	E	T	G	E	CPPC	4	4.2359e-05
283	CPPC	A	S	G	C	A	P	E	T	G	E	F	C	W	R	E	D	D	CPPC	4	4.2359e-05
284	CPPC	A	S	G	C	S	P	E	T	G	E	R	C	H	L	A	Q	T	CPPC	4	4.2359e-05
285	CPPC	A	S	G	C	S	P	E	T	G	E	I	C	W	R	E	D	D	CPPC	4	4.2359e-05
286	CPPC	A	S	G	C	S	P	E	T	G	E	Y	C	W	R	E	D	D	CPPC	4	4.2359e-05
287	CPPC	A	S	G	C	S	P	E	T	G	E	F	C	W	R	E	E	D	CPPC	4	4.2359e-05
288	CPPC	A	S	G	C	S	P	E	T	G	E	F	C	W	R	E	E	D	CPPC	4	4.2359e-05
289	CPPC	A	S	G	C	S	P	E	T	G	E	F	C	W	R	E	Y	D	CPPC	4	4.2359e-05
290	CPPC	A	S	G	C	S	P	E	T	G	E	F	C	W	R	L	D	D	CPPC	4	4.2359e-05
291	CPPC	A	S	G	C	W	P	E	T	G	E	F	C	W	R	E	D	D	CPPC	4	4.2359e-05
292	CPPC	A	I	G	C	S	P	E	T	G	E	F	C	W	R	E	D	D	CPPC	4	4.2359e-05
293	CPPC	G	N	V	R	C	S	W	S	G	E	C	C	W	R	T	P	E	CPPC	4	4.2359e-05
294	CPPC	V	E	S	H	C	P	L	L	M	I	Y	C	A	E	T	G	E	CPPC	4	4.2359e-05
295	CPPC	V	L	Q	C	K	V	R	P	E	S	D	C	G	A	T	G	E	CPPC	4	4.2359e-05
296	CPPC	V	L	E	C	K	V	R	P	E	S	D	C	G	A	T	G	E	CPPC	4	4.2359e-05
297	CPPC	V	L	E	C	K	V	R	P	E	S	D	C	G	A	T	G	E	CPPC	4	4.2359e-05
298	CPPC	V	L	E	C	E	V	R	P	E	S	D	C	G	A	T	G	E	CPPC	4	4.2359e-05
299	CPPC	V	E	S	H	C	P	L	L	T	I	Y	C	A	E	T	G	E	CPPC	4	4.2359e-05
300	CPPC	V	E	S	H	C	P	L	L	M	I	Y	C	A	E	T	G	E	CPPC	4	4.2359e-05
301	CPPC	V	E	S	H	C	P	L	L	M	I	Y	C	A	E	T	G	E	CPPC	4	4.2359e-05
302	CPPC	V	E	S	H	C	P	L	L	M	I	Y	C	A	E	T	G	E	CPPC	4	4.2359e-05
303	CPPC	V	E	S	H	C	P	L	L	M	I	Y	C	S	E	T	G	E	CPPC	4	4.2359e-05
304	CPPC	V	E	S	H	C	P	L	L	M	I	Y	C	A	E	T	G	E	CPPC	4	4.2359e-05
305	CPPC	S	G	C	K	R	I	V	F	C	R	D	T	G	E	V	T	W	CPPC	4	4.2359e-05
306	CPPC	W	R	G	W	C	V	C	D	D	G	E	C	Q	E	T	G	D	CPPC	4	4.2359e-05
307	CPPC	C	P	T	E	C	S	T	A	E	T	C	M	E	T	G	E	R	CPPC	4	4.2359e-05
308	CPPC	C	P	T	W	C	S	T	A	E	T	C	M	E	T	G	E	R	CPPC	4	4.2359e-05
309	CPPC	L	L	C	R	A	M	V	E	C	V	T	R	T	R	F	V	R	CPPC	4	4.2359e-05
310	CPPC	L	V	C	C	H	A	Q	P	E	C	G	V	A	D	G	V	E	CPPC	4	4.2359e-05
311	CPPC	A	S	G	C	S	P	E	T	G	E	F	C	W	R	E	D	D	CPPC	4	4.2359e-05
312	CPPC	R	A	C	A	T	D	I	E	T	G	E	C	A	G	Q	E	R	CPPC	3	3.17692e-05
313	CPPC	T	A	S	C	R	D	V	E	T	G	E	C	E	R	R	Y	Q	CPPC	3	3.17692e-05
314	CPPC	T	A	S	C	R	D	V	E	T	G	E	C	E	R	R	Y	L	CPPC	3	3.17692e-05
315	CPPC	T	A	S	C	R	D	V	E	T	G	E	C	E	R	R	Y	E	CPPC	3	3.17692e-05
316	CPPC	T	A	S	C	R	D	V	E	T	G	E	C	G	R	R	Y	Q	CPPC	3	3.17692e-05
317	CPPC	T	A	S	C	R	D	V	E	T	G	G	C	E	R	R	Y	Q	CPPC	3	3.17692e-05
318	CPPC	T	A	S	C	R	G	V	E	T	G	E	C	E	R	R	Y	Q	CPPC	3	3.17692e-05
319	CPPC	T	W	K	T	C	D	H	K	E	E	C	S	Y	R	E	K	M	CPPC	3	3.17692e-05
320	CPPC	R	T	R	C	D	R	E	T	G	E	R	C	H	L	A	Q	T	CPPC	3	3.17692e-05
321	CPPC	R	T	R	C	N	R	E	T	G	E	R	C	H	L	A	Q	T	CPPC	3	3.17692e-05
322	CPPC	R	T	R	C	D	R	E	T	R	E	R	C	H	L	A	Q	T	CPPC	3	3.17692e-05
323	CPPC	R	T	R	C	D	R	E	T	G	E	R	C	H	L	A	Q	T	CPPC	3	3.17692e-05
324	CPPC	R	T	R	C	D	R	E	T	G	E	R	C	H	L	A	Q	P	CPPC	3	3.17692e-05
325	CPPC	R	T	R	C	D	R	E	T	G	E	R	C	H	L	A	H	T	CPPC	3	3.17692e-05
326	CPPC	R	T	R	C	D	R	E	T	G	V	R	C	H	L	A	Q	T	CPPC	3	3.17692e-05
327	CPPC	R	T	R	C	D	R	V	T	G	E	R	C	H	L	A	Q	T	CPPC	3	3.17692e-05
328	CPPC	R	T	R	C	D	R	E	T	G	E	R	C	H	L	A	Q	T	CPPC	3	3.17692e-05
329	CPPC	R	S	R	C	D	R	E	T	G	E	R	C	H	L	A	Q	T	CPPC	3	3.17692e-05
330	CPPC	R	L	L	A	C	V	S	*	S	P	D	C	W	D	T	G	E	CPPC	3	3.17692e-05
331	CPPC	M	T	R	C	D	R	E	T	G	E	R	C	H	L	A	Q	T	CPPC	3	3.17692e-05
332	CPPC	M	S	E	C	C	S	G	F	H	H	G	C	S	E	S	E	P	CPPC	3	3.17692e-05
333	CPPC	I	E	T	N	C	P	L	D	A	I	V	C	E	V	Y	G	Y	CPPC	3	3.17692e-05
334	CPPC	P	L	W	E	C	L	G	T	K	G	S	C	R	S	G	P	Y	CPPC	3	3.17692e-05
335	CPPC	P	C	L	L	C	D	E	S	S	G	E	C	E	A	C	D	E	CPPC	3	3.17692e-05
336	CPPC	R	A	C	A	T	D	I	E	T	G	G	C	A	G	Q	E	R	CPPC	3	3.17692e-05
337	CPPC	R	A	C	A	A	D	I	E	T	G	E	C	A	G	Q	E	R	CPPC	3	3.17692e-05
338	CPPC	R	E	T	Q	C	V	P	V	S	W	E	C	W	E	T	G	E	CPPC	3	3.17692e-05
339	CPPC	R	E	T	Q	C	V	P	V	F	G	E	C	W	E	T	G	E	CPPC	3	3.17692e-05
340	CPPC	R	E	S	C	K	D	P	D	L	G	D	C	V	T	E	A	N	CPPC	3	3.17692e-05
341	CPPC	R	E	S	C	K	D	P	D	L	G	D	C	F	T	E	A	D	CPPC	3	3.17692e-05
342	CPPC	R	R	A	T	C	L	N	L	E	R	P	C	E	E	S	D	V	CPPC	3	3.17692e-05
343	CPPC	R	R	E	C	F	L	R	M	K	C	T	T	T	M	V	M	I	CPPC	3	3.17692e-05
344	CPPC	R	E	A	G	C	T	A	H	T	T	C	D	L	E	L	G	E	CPPC	3	3.17692e-05
345	CPPC	E	G	A	C	A	P	V	D	L	P	S	C	E	E	T	G	E	CPPC	3	3.17692e-05
346	CPPC	A	S	G	S	S	P	E	T	G	E	F	C	W	R	E	D	D	CPPC	3	3.17692e-05
347	CPPC	A	S	G	C	E	P	E	T	G	E	F	C	W	R	E	D	D	CPPC	3	3.17692e-05
348	CPPC	A	S	G	C	S	P	E	T	G	E	F	C	W	R	E	D	D	CPPC	3	3.17692e-05
349	CPPC	A	S	G	C	S	T	E	T	G	E	F	C	W	R	E	D	D	CPPC	3	3.17692e-05
350	CPPC	A	S	G	C	S	H	E	T	G	E	F	C	W	R	E	D	D	CPPC	3	3.17692e-05
351	CPPC	A	S	G	C	S	P	E	K	G	E	F	C	W	R	E	D	D	CPPC	3	3.17692e-05
352	CPPC	A	S	G	C	S	P	E	T	G	Q	F	C	W	R	E	D	D	CPPC	3	3.17692e-05
353	CPPC	A	S	G	C	S	P	E	T	G	E	F	C	W	R	E	D	E	CPPC	3	3.17692e-05
354	CPPC	A	S	G	C	S	P	E	T	G	E	F	C	W	R	E	D	Y	CPPC	3	3.17692e-05
355	CPPC	A	S	G	C	S	P	E	T	G	E	F	C	W	M	E	D	D	CPPC	3	3.17692e-05
356	CPPC	A	S	G	C	S	P	E	T	G	E	F	C	L	R	E	D	D	CPPC	3	3.17692e-05
357	CPPC	A	S	G	C	S	P	E	T	G	A	F	C	W	R	E	D	D	CPPC	3	3.17692e-05
358	CPPC	A	S	G	C	S	P	E	R	G	E	F	C	W	R	E	D	D	CPPC	3	3.17692e-05
359	CPPC	A	S	G	C	S	P	E	P	G	E	F	C	W	R	E	D	D	CPPC	3	3.17692e-05
360	CPPC	A	S	G	C	S	P	E	T	G	E	F	C	W	R	E	D	D	CPPC	3	3.17692e-05
361	CPPC	A	H	R	E	C	V	C	T	V	P	C	W	W	G	Y	R	W	CPPC	3	3.17692e-05
362	CPPC	G	L	L	A	C	V	S	*	S	S	D	C	W	D	T	G	E	CPPC	3	3.17692e-05
363	CPPC	V	P	E	C	K	V	R	P	E	S	D	C	G	A	T	G	E	CPPC	3	3.17692e-05
364	CPPC	V	P	E	C	V	*	T	V	S	K	D	C	V	T	T	E	P	CPPC	3	3.17692e-05
365	CPPC	V	L	E	C	K	V	R	P	E	T	D	C	G	A	T	G	E	CPPC	3	3.17692e-05
366	CPPC	V	L	E	C	K	V	R	P	E	S	D	C	G	A	T	G	E	CPPC	3	3.17692e-05
367	CPPC	V	L	E	C	K	V	R	P	E	S	D	C	G	A	T	G	K	CPPC	3	3.17692e-05
368	CPPC	V	L	E	C	K	V	R	P	E	S	D	C	G	A	A	G	E	CPPC	3	3.17692e-05
369	CPPC	V	E	S	H	C	P	L	L	M	I	Y	C	A	E	T	G	E	CPPC	3	3.17692e-05
370	CPPC	V	E	S	H	R	P	L	L	M	I	Y	C	A	E	T	G	E	CPPC	3	3.17692e-05
371	CPPC	V	E	S	H	Y	P	L	L	M	I	Y	C	A	E	T	G	E	CPPC	3	3.17692e-05
372	CPPC	V	E	S	H	C	P	L	L	K	I	Y	C	A	E	T	G	E	CPPC	3	3.17692e-05
373	CPPC	V	E	S	H	C	P	L	L	M	I	Y	S	A	E	T	G	E	CPPC	3	3.17692e-05
374	CPPC	V	E	S	H	C	P	L	L	M	I	Y	C	A	E	T	G	D	CPPC	3	3.17692e-05
375	CPPC	V	E	S	H	C	P	L	L	M	I	Y	C	A	E	S	G	E	CPPC	3	3.17692e-05
376	CPPC	V	E	S	H	C	P	L	L	M	I	C	C	A	E	T	G	E	CPPC	3	3.17692e-05
377	CPPC	V	E	F	H	C	P	L	L	M	I	Y	C	A	E	T	G	E	CPPC	3	3.17692e-05
378	CPPC	V	S	Q	E	C	C	W	G	F	Q	V	C	R	P	L	C	G	CPPC	3	3.17692e-05
379	CPPC	S	P	T	C	M	E	M	G	S	C	E	W	T	P	T	G	L	CPPC	3	3.17692e-05
380	CPPC	W	T	R	C	D	R	E	T	G	E	R	C	H	L	A	Q	T	CPPC	3	3.17692e-05
381	CPPC	W	E	C	E	R	Q	T	D	C	D	T	G	E	L	M	S	F	CPPC	3	3.17692e-05
382	CPPC	W	E	C	E	R	Q	T	D	G	D	T	G	E	L	M	S	F	CPPC	3	3.17692e-05
383	CPPC	W	L	H	P	C	R	S	M	E	F	S	C	R	R	F	R	P	CPPC	3	3.17692e-05
384	CPPC	C	P	T	Q	C	S	T	A	E	T	C	M	E	T	G	E	R	CPPC	3	3.17692e-05
385	CPPC	C	P	T	E	R	S	T	A	E	T	C	M	E	T	G	E	R	CPPC	3	3.17692e-05
386	CPPC	C	P	T	E	C	S	T	A	E	T	C	M	E	T	G	G	R	CPPC	3	3.17692e-05
387	CPPC	C	P	T	E	C	S	T	A	E	T	C	M	G	T	G	E	R	CPPC	3	3.17692e-05
388	CPPC	C	L	K	C	E	V	P	M	S	C	Y	E	I	E	T	G	E	CPPC	3	3.17692e-05
389	CPPC	C	P	T	E	C	S	T	A	E	T	C	M	E	T	G	E	R	CPPC	3	3.17692e-05
390	CPPC	T	A	S	C	R	D	V	E	T	G	E	C	E	R	R	Y	Q	CPPC	2	2.11795e-05
391	CPPC	R	E	S	C	K	D	P	D	L	G	D	C	F	T	E	A	N	CPPC	2	2.11795e-05
392	CPPC	R	E	A	G	C	T	A	H	T	T	C	D	L	E	L	G	E	CPPC	2	2.11795e-05
393	CPPC	K	D	I	D	C	S	D	M	G	R	C	D	T	D	K	Y	N	CPPC	2	2.11795e-05
394	CPPC	K	E	F	C	A	F	S	T	G	M	W	C	Y	Y	M	W	T	CPPC	2	2.11795e-05
395	CPPC	T	A	S	S	R	D	V	E	T	G	E	C	E	R	R	Y	Q	CPPC	2	2.11795e-05
396	CPPC	T	A	S	C	R	D	V	E	T	G	E	C	E	R	R	Y	Q	CPPC	2	2.11795e-05
397	CPPC	T	A	S	C	R	D	A	E	T	G	E	C	E	R	R	Y	Q	CPPC	2	2.11795e-05
398	CPPC	T	A	S	C	R	D	V	E	T	R	E	C	E	R	R	Y	Q	CPPC	2	2.11795e-05
399	CPPC	T	A	S	C	R	D	V	E	T	G	E	C	E	R	R	Y	Q	CPPC	2	2.11795e-05
400	CPPC	T	A	S	C	R	D	V	E	T	G	E	C	E	R	R	Y	Q	CPPC	2	2.11795e-05
401	CPPC	T	A	S	C	R	D	V	E	T	G	E	C	E	R	G	Y	Q	CPPC	2	2.11795e-05
402	CPPC	T	A	S	C	R	D	V	E	T	G	E	C	E	R	W	Y	Q	CPPC	2	2.11795e-05
403	CPPC	T	A	S	C	R	D	V	E	T	G	E	C	E	R	R	Y	Q	CPPC	2	2.11795e-05
404	CPPC	T	A	S	C	R	D	V	G	T	G	E	C	E	R	R	Y	Q	CPPC	2	2.11795e-05
405	CPPC	T	S	E	C	E	H	E	I	L	C	W	F	E	K	M	S	L	CPPC	2	2.11795e-05
406	CPPC	T	I	C	N	G	S	P	C	V	C	E	C	S	L	G	P	Q	CPPC	2	2.11795e-05
407	CPPC	T	R	C	L	R	E	L	W	C	L	F	A	S	I	E	G	S	CPPC	2	2.11795e-05
408	CPPC	T	A	S	C	R	D	V	E	T	G	E	C	E	R	R	Y	Q	CPPC	2	2.11795e-05
409	CPPC	R	T	R	C	D	R	E	T	G	E	R	C	H	L	A	Q	T	CPPC	2	2.11795e-05
410	CPPC	R	T	R	C	D	R	E	T	G	E	F	C	W	R	E	D	D	CPPC	2	2.11795e-05
411	CPPC	R	T	R	C	D	R	E	T	G	E	S	C	H	L	A	Q	T	CPPC	2	2.11795e-05
412	CPPC	R	T	R	C	D	R	E	T	G	E	R	S	H	L	A	Q	T	CPPC	2	2.11795e-05
413	CPPC	R	T	R	C	D	R	E	T	G	E	R	C	H	L	A	P	T	CPPC	2	2.11795e-05
414	CPPC	R	T	R	C	D	R	E	T	G	E	R	C	P	L	A	Q	T	CPPC	2	2.11795e-05
415	CPPC	R	T	R	C	D	R	E	T	G	E	R	C	L	L	A	Q	T	CPPC	2	2.11795e-05
416	CPPC	R	T	R	C	D	R	E	T	G	E	W	C	H	L	A	Q	T	CPPC	2	2.11795e-05
417	CPPC	R	T	R	C	D	R	E	T	G	D	R	C	H	L	A	Q	T	CPPC	2	2.11795e-05
418	CPPC	R	T	R	C	D	R	E	T	W	E	R	C	H	L	A	Q	T	CPPC	2	2.11795e-05
419	CPPC	R	T	R	C	D	R	E	I	G	E	R	C	H	L	A	Q	T	CPPC	2	2.11795e-05
420	CPPC	R	T	R	C	D	R	D	T	G	E	R	C	H	L	A	Q	T	CPPC	2	2.11795e-05
421	CPPC	R	T	R	C	D	L	E	T	G	E	R	C	H	L	A	Q	T	CPPC	2	2.11795e-05
422	CPPC	R	T	R	W	D	R	E	T	G	E	R	C	H	L	A	Q	T	CPPC	2	2.11795e-05
423	CPPC	R	R	E	S	C	P	L	D	A	V	E	C	V	S	G	R	F	CPPC	2	2.11795e-05
424	CPPC	R	L	E	C	S	P	L	L	E	S	E	C	L	W	K	A	D	CPPC	2	2.11795e-05
425	CPPC	R	S	C	L	D	E	Y	G	E	R	L	C	M	G	E	P	A	CPPC	2	2.11795e-05
426	CPPC	R	L	P	A	C	V	S	*	S	S	D	C	W	D	T	G	E	CPPC	2	2.11795e-05
427	CPPC	R	L	L	A	R	V	S	*	S	S	D	C	W	D	T	G	E	CPPC	2	2.11795e-05
428	CPPC	R	L	L	A	C	V	S	*	S	S	D	C	W	D	T	G	E	CPPC	2	2.11795e-05
429	CPPC	R	L	L	A	C	V	S	*	S	S	D	C	R	D	T	G	E	CPPC	2	2.11795e-05
430	CPPC	R	L	L	A	C	V	S	*	S	S	D	C	W	D	T	G	K	CPPC	2	2.11795e-05
431	CPPC	R	L	L	A	C	V	S	*	S	S	D	C	W	D	T	G	E	CPPC	2	2.11795e-05
432	CPPC	R	L	L	V	C	V	S	*	S	S	D	C	W	D	T	G	E	CPPC	2	2.11795e-05
433	CPPC	R	F	Q	L	C	M	C	L	T	R	E	C	S	E	D	W	G	CPPC	2	2.11795e-05
434	CPPC	S	L	T	V	C	A	E	T	G	E	V	C	T	S	E	F	E	CPPC	2	2.11795e-05
435	CPPC	M	E	S	H	C	P	L	L	M	I	Y	C	A	E	T	G	E	CPPC	2	2.11795e-05
436	CPPC	I	A	C	G	E	A	C	D	C	E	W	E	E	Q	G	T	E	CPPC	2	2.11795e-05
437	CPPC	Q	N	V	T	C	H	R	F	Y	E	C	G	V	R	G	R	F	CPPC	2	2.11795e-05
438	CPPC	Q	V	F	L	C	L	Y	Q	G	E	C	H	L	W	L	G	C	CPPC	2	2.11795e-05
439	CPPC	H	Q	V	T	C	G	N	S	H	C	L	C	E	W	C	V	H	CPPC	2	2.11795e-05
440	CPPC	H	P	E	C	C	G	P	R	D	R	C	R	F	S	G	S	M	CPPC	2	2.11795e-05
441	CPPC	P	I	D	C	A	E	L	G	A	C	K	E	T	P	H	L	P	CPPC	2	2.11795e-05
442	CPPC	P	S	C	R	S	R	G	T	G	E	R	C	G	F	V	W	A	CPPC	2	2.11795e-05
443	CPPC	P	C	I	E	C	F	R	I	Q	W	C	W	R	V	H	P	G	CPPC	2	2.11795e-05
444	CPPC	P	F	R	E	C	W	R	S	T	V	C	F	Y	F	E	R	G	CPPC	2	2.11795e-05
445	CPPC	P	P	C	E	Y	R	I	G	L	A	A	C	I	R	A	S	W	CPPC	2	2.11795e-05
446	CPPC	P	L	D	H	C	E	L	E	F	S	R	C	P	G	S	S	A	CPPC	2	2.11795e-05
447	CPPC	R	D	A	C	G	E	Y	L	L	C	F	M	P	I	L	A	T	CPPC	2	2.11795e-05
448	CPPC	R	A	C	A	T	D	I	E	T	G	E	C	A	G	Q	E	R	CPPC	2	2.11795e-05
449	CPPC	R	A	C	A	T	D	I	E	T	G	E	C	A	G	Q	E	R	CPPC	2	2.11795e-05
450	CPPC	R	A	C	A	T	D	I	E	T	G	E	C	A	G	Q	E	R	CPPC	2	2.11795e-05
451	CPPC	R	A	C	A	T	D	I	E	T	S	E	C	A	G	Q	E	R	CPPC	2	2.11795e-05
452	CPPC	R	A	C	A	T	D	I	E	T	G	E	C	A	G	Q	E	S	CPPC	2	2.11795e-05
453	CPPC	R	A	C	A	T	D	I	E	T	G	E	C	A	G	Q	E	R	CPPC	2	2.11795e-05
454	CPPC	R	A	C	A	T	D	I	E	T	G	E	C	A	G	Q	G	R	CPPC	2	2.11795e-05
455	CPPC	R	A	C	A	T	D	I	E	T	G	E	C	G	G	Q	E	R	CPPC	2	2.11795e-05
456	CPPC	R	A	C	A	T	D	I	E	T	G	E	C	V	G	Q	E	R	CPPC	2	2.11795e-05
457	CPPC	R	E	T	Q	C	V	P	V	F	W	E	C	W	E	T	G	E	CPPC	2	2.11795e-05
458	CPPC	R	E	T	Q	C	V	P	V	F	W	E	C	W	E	T	V	E	CPPC	2	2.11795e-05
459	CPPC	R	E	T	Q	C	V	P	V	F	W	E	C	W	E	M	G	E	CPPC	2	2.11795e-05
460	CPPC	R	E	P	C	K	D	P	D	L	G	D	C	F	T	E	A	N	CPPC	2	2.11795e-05
461	CPPC	R	E	S	H	C	P	L	L	M	I	Y	C	A	E	T	G	E	CPPC	2	2.11795e-05
462	CPPC	R	E	S	C	K	D	P	D	L	G	D	C	F	T	E	A	K	CPPC	2	2.11795e-05
463	CPPC	R	Y	R	E	C	S	C	L	E	M	C	L	Y	A	V	W	G	CPPC	2	2.11795e-05
464	CPPC	R	S	S	C	K	D	P	D	L	G	D	C	F	T	E	A	N	CPPC	2	2.11795e-05
465	CPPC	R	T	R	C	I	L	G	F	L	D	M	C	L	V	R	T	G	CPPC	2	2.11795e-05
466	CPPC	R	P	T	E	C	S	T	A	E	T	C	M	E	T	G	E	R	CPPC	2	2.11795e-05
467	CPPC	R	R	P	E	C	R	R	D	V	N	S	C	L	L	R	I	T	CPPC	2	2.11795e-05
468	CPPC	R	E	A	G	C	T	A	H	T	T	C	D	L	E	L	G	E	CPPC	2	2.11795e-05
469	CPPC	R	E	A	G	C	T	A	H	T	T	Y	D	L	E	L	G	E	CPPC	2	2.11795e-05
470	CPPC	R	E	A	G	C	T	A	H	T	T	C	D	L	E	L	G	Q	CPPC	2	2.11795e-05
471	CPPC	R	E	A	G	C	T	A	H	T	T	C	D	L	G	L	G	E	CPPC	2	2.11795e-05
472	CPPC	R	E	A	G	C	T	A	R	T	T	C	D	L	E	L	G	E	CPPC	2	2.11795e-05
473	CPPC	R	E	A	G	C	T	A	H	T	T	C	D	L	E	L	G	E	CPPC	2	2.11795e-05
474	CPPC	R	E	A	G	C	A	A	H	T	T	C	D	L	E	L	G	E	CPPC	2	2.11795e-05
475	CPPC	R	A	C	A	T	D	I	E	T	G	E	C	A	G	Q	E	R	CPPC	2	2.11795e-05
476	CPPC	R	V	T	Q	C	H	P	E	G	P	C	I	R	P	P	R	L	CPPC	2	2.11795e-05
477	CPPC	R	S	R	A	C	S	P	R	G	A	P	C	E	C	L	L	R	CPPC	2	2.11795e-05
478	CPPC	R	C	C	G	G	A	S	C	C	A	F	A	V	F	E	F	S	CPPC	2	2.11795e-05
479	CPPC	L	A	S	E	C	R	L	R	S	A	I	C	L	W	Q	R	S	CPPC	2	2.11795e-05
480	CPPC	L	L	E	G	C	L	L	E	E	W	D	C	S	A	T	G	E	CPPC	2	2.11795e-05
481	CPPC	L	L	E	G	C	L	L	E	Y	W	D	C	S	A	T	G	E	CPPC	2	2.11795e-05
482	CPPC	L	A	R	W	C	L	E	G	V	R	F	C	E	L	R	S	S	CPPC	2	2.11795e-05
483	CPPC	L	G	S	P	C	G	Q	R	Y	E	C	C	P	S	A	N	C	CPPC	2	2.11795e-05
484	CPPC	L	E	C	N	L	R	P	R	C	C	P	T	S	S	G	G	S	CPPC	2	2.11795e-05
485	CPPC	E	T	G	C	E	S	L	G	P	C	D	A	I	S	G	A	L	CPPC	2	2.11795e-05
486	CPPC	E	T	G	C	E	S	L	G	S	C	D	A	I	S	G	A	L	CPPC	2	2.11795e-05
487	CPPC	E	T	G	C	E	S	L	G	S	C	D	A	I	S	S	A	L	CPPC	2	2.11795e-05
488	CPPC	E	G	A	C	A	S	V	D	L	P	S	C	E	E	T	G	E	CPPC	2	2.11795e-05
489	CPPC	A	S	G	C	S	P	E	T	G	G	F	C	W	R	E	D	D	CPPC	2	2.11795e-05
490	CPPC	A	I	Q	C	G	V	V	T	G	C	S	S	S	E	G	G	E	CPPC	2	2.11795e-05
491	CPPC	A	L	E	C	K	V	R	P	E	S	D	C	G	A	T	G	E	CPPC	2	2.11795e-05
492	CPPC	A	A	C	R	E	R	Y	G	F	V	R	C	L	V	G	F	E	CPPC	2	2.11795e-05
493	CPPC	A	G	A	C	A	S	V	D	L	P	S	C	E	E	T	G	E	CPPC	2	2.11795e-05
494	CPPC	A	T	G	C	S	P	E	T	G	E	F	C	W	R	E	D	D	CPPC	2	2.11795e-05
495	CPPC	A	S	G	G	S	P	E	T	G	E	F	C	W	R	E	D	D	CPPC	2	2.11795e-05
496	CPPC	A	S	G	C	T	E	E	F	T	E	G	C	F	L	V	G	L	CPPC	2	2.11795e-05
497	CPPC	A	S	G	C	S	P	E	T	G	E	F	C	W	R	E	D	D	CPPC	2	2.11795e-05
498	CPPC	A	S	G	C	S	P	Q	T	G	E	F	C	W	R	E	D	D	CPPC	2	2.11795e-05
499	CPPC	A	S	G	C	S	P	E	T	G	E	F	C	W	R	E	D	D	CPPC	2	2.11795e-05
500	CPPC	A	S	G	C	S	P	E	T	G	D	F	C	W	R	E	D	D	CPPC	2	2.11795e-05
501	CPPC	A	S	G	C	S	P	E	T	G	E	F	C	S	R	E	D	D	CPPC	2	2.11795e-05
502	CPPC	A	S	G	C	S	P	E	T	G	E	F	C	W	S	E	D	D	CPPC	2	2.11795e-05
503	CPPC	A	S	G	C	S	P	E	T	G	E	F	C	W	R	E	H	D	CPPC	2	2.11795e-05
504	CPPC	A	S	G	C	S	P	E	T	G	E	F	C	W	R	E	D	D	CPPC	2	2.11795e-05
505	CPPC	A	S	G	C	S	P	E	T	G	E	F	C	W	R	E	D	D	CPPC	2	2.11795e-05
506	CPPC	A	S	G	C	S	P	E	T	G	E	F	C	W	R	E	G	D	CPPC	2	2.11795e-05
507	CPPC	A	S	G	C	S	P	E	T	G	E	F	C	W	R	E	D	D	CPPC	2	2.11795e-05
508	CPPC	A	S	G	C	S	P	D	T	G	E	F	C	W	R	E	D	D	CPPC	2	2.11795e-05
509	CPPC	A	S	G	C	S	A	E	T	G	E	F	C	W	R	E	D	D	CPPC	2	2.11795e-05
510	CPPC	A	S	G	C	S	F	E	T	G	E	F	C	W	R	E	D	D	CPPC	2	2.11795e-05
511	CPPC	A	S	G	C	S	P	E	T	G	E	F	C	W	R	E	D	D	CPPC	2	2.11795e-05
512	CPPC	A	E	M	C	H	T	T	F	V	C	E	C	N	R	A	E	D	CPPC	2	2.11795e-05
513	CPPC	G	T	A	E	C	W	G	V	L	D	E	C	D	D	R	W	P	CPPC	2	2.11795e-05
514	CPPC	G	T	R	C	D	R	E	T	G	E	R	C	H	L	A	Q	A	CPPC	2	2.11795e-05
515	CPPC	G	S	C	K	S	T	Q	R	E	T	E	C	G	R	E	R	K	CPPC	2	2.11795e-05
516	CPPC	G	E	R	C	C	T	W	C	L	R	E	C	C	S	E	V	S	CPPC	2	2.11795e-05
517	CPPC	G	E	S	H	C	P	L	L	M	I	Y	C	A	E	T	G	E	CPPC	2	2.11795e-05
518	CPPC	G	W	V	E	C	Y	I	A	S	Y	L	C	G	N	R	G	A	CPPC	2	2.11795e-05
519	CPPC	G	F	K	C	R	S	A	E	R	S	A	C	G	V	A	G	V	CPPC	2	2.11795e-05
520	CPPC	G	S	G	C	S	P	E	T	G	E	F	C	W	R	E	D	D	CPPC	2	2.11795e-05
521	CPPC	G	P	T	E	C	S	T	A	E	T	C	M	E	T	G	E	R	CPPC	2	2.11795e-05
522	CPPC	G	R	N	C	C	A	T	C	E	T	D	C	E	E	L	G	F	CPPC	2	2.11795e-05
523	CPPC	G	A	C	K	H	E	L	G	P	W	E	C	G	T	D	S	V	CPPC	2	2.11795e-05
524	CPPC	V	Q	S	H	C	P	L	L	M	I	Y	C	A	E	T	G	E	CPPC	2	2.11795e-05
525	CPPC	V	R	V	A	C	L	P	L	L	Y	E	C	Q	A	I	F	L	CPPC	2	2.11795e-05
526	CPPC	V	L	E	C	K	V	R	P	E	S	D	C	G	A	T	G	E	CPPC	2	2.11795e-05
527	CPPC	V	L	E	C	K	V	R	P	E	S	D	C	G	A	T	G	E	CPPC	2	2.11795e-05
528	CPPC	V	L	E	C	K	V	R	P	E	S	D	R	G	A	T	G	E	CPPC	2	2.11795e-05
529	CPPC	V	L	E	C	K	V	R	P	E	S	D	C	G	A	T	G	E	CPPC	2	2.11795e-05
530	CPPC	V	L	E	C	K	V	R	P	E	S	D	C	G	A	T	G	E	CPPC	2	2.11795e-05
531	CPPC	V	L	E	C	K	V	R	P	E	S	D	C	G	V	T	G	E	CPPC	2	2.11795e-05
532	CPPC	V	L	E	C	K	V	R	P	E	S	G	C	G	A	T	G	E	CPPC	2	2.11795e-05
533	CPPC	V	L	E	C	N	V	R	P	E	S	D	C	G	A	T	G	E	CPPC	2	2.11795e-05
534	CPPC	V	L	E	C	M	V	R	P	E	S	D	C	G	A	T	G	E	CPPC	2	2.11795e-05
535	CPPC	V	E	S	H	C	P	L	Q	M	I	Y	C	A	E	T	G	E	CPPC	2	2.11795e-05
536	CPPC	V	E	S	H	C	P	L	R	M	I	Y	C	A	E	T	G	E	CPPC	2	2.11795e-05
537	CPPC	V	E	S	H	C	P	L	L	M	M	Y	C	A	E	T	G	E	CPPC	2	2.11795e-05
538	CPPC	V	E	S	H	C	P	L	L	M	I	H	C	A	E	T	G	E	CPPC	2	2.11795e-05
539	CPPC	V	E	S	H	C	P	L	L	M	I	Y	Y	A	E	T	G	E	CPPC	2	2.11795e-05
540	CPPC	V	E	S	H	C	P	L	L	M	I	Y	*	A	E	T	G	E	CPPC	2	2.11795e-05
541	CPPC	V	E	S	H	C	P	L	L	M	I	Y	C	A	E	T	G	E	CPPC	2	2.11795e-05
542	CPPC	V	E	S	H	C	P	L	L	M	I	Y	C	A	E	T	G	E	CPPC	2	2.11795e-05
543	CPPC	V	E	S	H	C	P	L	L	M	I	Y	C	A	E	T	G	E	CPPC	2	2.11795e-05
544	CPPC	V	E	S	H	C	P	L	L	M	I	Y	C	A	E	T	G	E	CPPC	2	2.11795e-05
545	CPPC	V	E	S	H	C	P	L	L	M	I	Y	C	A	E	T	G	V	CPPC	2	2.11795e-05
546	CPPC	V	E	S	H	C	P	L	L	M	I	Y	C	A	E	I	G	E	CPPC	2	2.11795e-05
547	CPPC	V	E	S	H	C	P	L	L	M	I	Y	C	A	E	T	G	E	CPPC	2	2.11795e-05
548	CPPC	V	E	S	H	C	P	L	L	M	F	Y	C	A	E	T	G	E	CPPC	2	2.11795e-05
549	CPPC	V	E	S	H	C	P	L	L	V	I	Y	C	A	E	T	G	E	CPPC	2	2.11795e-05
550	CPPC	V	E	S	H	C	P	L	L	M	I	Y	C	A	E	T	G	E	CPPC	2	2.11795e-05
551	CPPC	V	E	S	R	C	P	L	L	M	I	Y	C	A	E	T	G	E	CPPC	2	2.11795e-05
552	CPPC	V	E	S	Y	C	P	L	L	M	I	Y	C	A	E	T	G	E	CPPC	2	2.11795e-05
553	CPPC	V	R	S	W	C	V	F	V	T	V	R	C	N	W	F	Q	E	CPPC	2	2.11795e-05
554	CPPC	V	L	*	G	C	T	H	S	S	A	C	S	N	M	R	S	L	CPPC	2	2.11795e-05
555	CPPC	V	V	C	V	D	A	D	L	G	V	P	C	S	P	R	A	V	CPPC	2	2.11795e-05
556	CPPC	V	L	C	L	R	L	G	P	L	E	Y	C	T	L	H	E	M	CPPC	2	2.11795e-05
557	CPPC	E	R	A	C	S	I	V	Y	V	E	Q	C	L	R	G	P	S	CPPC	2	2.11795e-05
558	CPPC	E	R	L	G	M	C	A	E	T	S	D	C	A	D	L	G	A	CPPC	2	2.11795e-05
559	CPPC	E	S	C	L	I	S	I	L	C	R	R	D	G	M	D	G	E	CPPC	2	2.11795e-05
560	CPPC	E	F	C	L	R	S	Q	F	G	R	L	C	G	V	S	W	L	CPPC	2	2.11795e-05
561	CPPC	Y	T	E	C	C	E	T	G	E	M	Y	C	C	D	E	L	A	CPPC	2	2.11795e-05
562	CPPC	Y	T	R	P	W	C	T	T	N	V	E	C	E	D	T	G	E	CPPC	2	2.11795e-05
563	CPPC	S	A	S	C	R	D	V	E	T	G	E	C	E	R	R	Y	Q	CPPC	2	2.11795e-05
564	CPPC	S	W	C	M	T	V	C	E	V	F	E	C	W	R	A	C	L	CPPC	2	2.11795e-05
565	CPPC	S	C	S	C	E	E	Y	F	V	C	D	L	Y	C	V	C	R	CPPC	2	2.11795e-05
566	CPPC	C	P	T	E	C	S	T	A	E	T	C	M	E	T	G	E	R	CPPC	2	2.11795e-05
567	CPPC	W	I	C	K	V	R	A	K	W	G	E	C	S	S	C	K	R	CPPC	2	2.11795e-05
568	CPPC	W	E	C	E	R	Q	T	D	R	D	T	G	E	L	M	S	F	CPPC	2	2.11795e-05
569	CPPC	W	E	C	E	R	Q	T	D	C	D	T	G	E	L	M	P	F	CPPC	2	2.11795e-05
570	CPPC	W	E	C	E	R	Q	T	D	C	D	T	G	E	L	V	S	F	CPPC	2	2.11795e-05
571	CPPC	W	A	C	A	T	D	I	E	T	G	E	C	A	G	Q	E	R	CPPC	2	2.11795e-05
572	CPPC	C	P	T	E	C	S	T	A	E	T	C	M	E	T	G	E	R	CPPC	2	2.11795e-05
573	CPPC	C	P	T	E	S	S	T	A	E	T	C	M	E	T	G	E	R	CPPC	2	2.11795e-05
574	CPPC	C	P	T	E	C	S	T	A	E	T	C	M	E	T	G	E	R	CPPC	2	2.11795e-05
575	CPPC	C	P	T	E	C	S	T	A	E	T	R	M	E	T	G	E	R	CPPC	2	2.11795e-05
576	CPPC	C	P	T	E	C	S	T	A	E	T	C	M	E	T	G	E	R	CPPC	2	2.11795e-05
577	CPPC	C	P	T	E	C	S	T	A	E	T	C	M	E	T	G	E	R	CPPC	2	2.11795e-05
578	CPPC	C	P	T	E	C	S	T	A	E	T	C	M	E	T	G	E	S	CPPC	2	2.11795e-05
579	CPPC	C	P	T	E	C	S	T	A	E	T	C	M	E	T	G	V	R	CPPC	2	2.11795e-05
580	CPPC	C	P	T	E	C	S	T	A	E	T	C	V	E	T	G	E	R	CPPC	2	2.11795e-05
581	CPPC	C	P	T	E	C	S	T	V	E	T	C	M	E	T	G	E	R	CPPC	2	2.11795e-05
582	CPPC	C	P	I	E	C	S	T	A	E	T	C	M	E	T	G	E	R	CPPC	2	2.11795e-05
583	CPPC	C	P	A	E	C	S	T	A	E	T	C	M	E	T	G	E	R	CPPC	2	2.11795e-05
584	CPPC	L	P	V	C	F	C	H	S	R	V	E	C	F	A	M	L	I	CPPC	2	2.11795e-05
585	CPPC	F	D	M	A	C	V	S	W	G	E	C	S	T	P	E	K	E	CPPC	2	2.11795e-05
586	CPPC	E	E	E	C	N	S	T	T	P	C	L	A	Y	V	A	F	M	CPPC	2	2.11795e-05
587	CPPC	Y	P	E	C	F	P	R	G	W	C	V	V	V	P	D	W	T	CPPC	2	2.11795e-05
588	CPPC	K	D	I	D	C	S	D	M	G	R	C	D	T	D	E	Y	N	CPPC	1	1.05897e-05
589	CPPC	R	L	L	A	C	V	S	*	S	S	D	C	W	D	T	G	E	CPPC	1	1.05897e-05
590	CPPC	H	V	E	C	P	G	A	F	S	V	A	C	V	E	T	G	I	CPPC	1	1.05897e-05
591	CPPC	P	S	C	R	S	R	E	T	G	E	R	C	G	F	V	W	A	CPPC	1	1.05897e-05
592	CPPC	R	A	C	A	T	D	I	E	T	G	E	C	A	G	Q	E	R	CPPC	1	1.05897e-05
593	CPPC	R	A	C	A	T	D	I	E	T	G	E	C	A	G	Q	E	R	CPPC	1	1.05897e-05
594	CPPC	L	L	E	G	C	L	L	E	Y	W	D	C	S	A	T	G	E	CPPC	1	1.05897e-05
595	CPPC	V	L	E	C	K	V	R	P	E	S	D	C	G	A	T	G	E	CPPC	1	1.05897e-05
596	CPPC	V	L	E	C	K	V	R	P	E	S	D	C	G	V	T	G	E	CPPC	1	1.05897e-05
597	CPPC	E	R	L	G	M	C	A	E	T	S	D	C	T	D	L	G	A	CPPC	1	1.05897e-05
598	CPPC	W	E	C	E	R	Q	T	D	C	D	T	G	E	L	M	S	F	CPPC	1	1.05897e-05
599	CPPC	C	P	T	E	C	S	T	A	E	T	C	M	E	T	G	E	R	CPPC	1	1.05897e-05
600	CPPC	F	D	M	A	C	V	I	W	G	E	C	S	T	P	E	K	E	CPPC	1	1.05897e-05
601	CPPC	R	T	R	C	D	R	E	T	G	E	R	C	H	L	A	Q	T	CPPC	1	1.05897e-05
602	CPPC	R	L	L	A	C	V	S	*	S	S	D	C	W	D	T	G	E	CPPC	1	1.05897e-05
603	CPPC	W	E	C	E	R	Q	T	D	C	D	T	G	E	L	M	S	F	CPPC	1	1.05897e-05
604	CPPC	C	P	T	E	C	S	T	A	E	T	C	M	E	T	G	E	R	CPPC	1	1.05897e-05
605	CPPC	K	I	I	C	V	S	F	W	F	C	Y	Y	E	W	P	G	E	CPPC	1	1.05897e-05
606	CPPC	K	P	L	C	F	F	F	H	S	C	R	E	W	S	P	V	R	CPPC	1	1.05897e-05
607	CPPC	K	D	I	D	C	S	D	M	G	R	C	D	T	D	E	Y	N	CPPC	1	1.05897e-05
608	CPPC	K	D	I	D	C	S	D	M	G	R	C	D	T	E	E	Y	N	CPPC	1	1.05897e-05
609	CPPC	K	D	I	D	C	S	D	M	G	R	C	D	T	D	E	Y	N	CPPC	1	1.05897e-05
610	CPPC	K	D	I	D	C	S	D	M	G	R	C	D	T	D	E	Y	I	CPPC	1	1.05897e-05
611	CPPC	K	D	I	D	C	S	D	L	G	R	C	D	T	D	E	Y	N	CPPC	1	1.05897e-05
612	CPPC	K	L	L	A	C	V	S	*	S	S	D	C	W	D	T	G	E	CPPC	1	1.05897e-05
613	CPPC	K	L	Y	N	P	E	S	G	E	E	S	C	A	H	E	C	L	CPPC	1	1.05897e-05
614	CPPC	K	L	C	N	P	E	S	G	E	E	S	C	A	H	E	C	L	CPPC	1	1.05897e-05
615	CPPC	N	T	C	M	A	G	H	S	L	V	E	C	P	C	E	R	P	CPPC	1	1.05897e-05
616	CPPC	N	R	C	T	L	T	V	N	C	R	E	L	E	T	L	S	S	CPPC	1	1.05897e-05
617	CPPC	N	G	R	G	C	P	Q	L	H	E	C	V	W	S	S	L	S	CPPC	1	1.05897e-05
618	CPPC	N	E	C	Q	T	P	G	P	A	A	Y	C	T	Q	N	D	H	CPPC	1	1.05897e-05
619	CPPC	N	S	Y	E	C	K	V	I	R	G	E	C	C	A	G	K	N	CPPC	1	1.05897e-05
620	CPPC	N	S	C	A	S	I	E	S	C	E	A	C	F	E	F	L	S	CPPC	1	1.05897e-05
621	CPPC	T	K	E	C	E	I	P	V	A	T	E	C	W	F	V	P	E	CPPC	1	1.05897e-05
622	CPPC	T	T	R	C	D	R	E	T	G	E	R	C	H	L	A	Q	T	CPPC	1	1.05897e-05
623	CPPC	T	P	V	L	C	I	L	R	G	Q	F	C	W	E	W	I	W	CPPC	1	1.05897e-05
624	CPPC	T	A	N	C	R	D	V	E	T	G	E	C	E	R	R	Y	Q	CPPC	1	1.05897e-05
625	CPPC	T	A	S	C	R	D	V	E	T	G	E	C	E	R	R	Y	Q	CPPC	1	1.05897e-05
626	CPPC	T	A	S	R	R	D	V	E	T	G	E	C	E	R	R	Y	Q	CPPC	1	1.05897e-05
627	CPPC	T	A	S	Y	R	D	V	E	T	G	E	C	E	R	R	Y	Q	CPPC	1	1.05897e-05
628	CPPC	T	A	S	C	R	D	V	E	T	G	E	C	E	R	R	Y	K	CPPC	1	1.05897e-05
629	CPPC	T	A	S	C	R	N	V	E	T	G	E	C	E	R	R	Y	Q	CPPC	1	1.05897e-05
630	CPPC	T	A	S	C	R	D	V	E	T	G	E	C	E	R	R	Y	Q	CPPC	1	1.05897e-05
631	CPPC	T	A	S	C	R	D	V	E	T	G	E	R	E	R	R	Y	Q	CPPC	1	1.05897e-05
632	CPPC	T	A	S	C	R	D	V	E	T	G	E	C	E	Q	R	Y	Q	CPPC	1	1.05897e-05
633	CPPC	T	A	S	C	R	D	V	E	T	G	E	C	E	R	R	Y	Q	CPPC	1	1.05897e-05
634	CPPC	T	A	S	C	R	D	V	E	T	G	E	C	E	R	R	Y	K	CPPC	1	1.05897e-05
635	CPPC	T	A	S	C	R	D	V	E	T	G	E	C	E	R	R	Y	Q	CPPC	1	1.05897e-05
636	CPPC	T	A	S	C	R	D	V	E	T	G	E	C	E	R	R	Y	P	CPPC	1	1.05897e-05
637	CPPC	T	A	S	C	R	D	V	E	T	G	E	C	E	R	L	Y	Q	CPPC	1	1.05897e-05
638	CPPC	T	A	S	C	R	D	V	E	T	W	E	C	E	R	R	Y	Q	CPPC	1	1.05897e-05
639	CPPC	T	A	S	C	R	D	V	E	R	G	E	C	E	R	R	Y	Q	CPPC	1	1.05897e-05
640	CPPC	T	A	S	C	R	D	V	E	A	G	E	C	E	R	R	Y	Q	CPPC	1	1.05897e-05
641	CPPC	T	A	S	C	C	D	V	E	T	G	E	C	E	R	R	Y	Q	CPPC	1	1.05897e-05
642	CPPC	T	A	S	F	R	D	V	E	T	G	E	C	E	R	R	Y	Q	CPPC	1	1.05897e-05
643	CPPC	T	A	E	C	E	R	S	S	E	C	K	C	A	P	L	S	P	CPPC	1	1.05897e-05
644	CPPC	T	A	G	C	R	D	V	E	T	G	E	C	E	R	R	Y	Q	CPPC	1	1.05897e-05
645	CPPC	T	S	C	L	E	F	T	L	C	V	W	L	L	S	A	L	S	CPPC	1	1.05897e-05
646	CPPC	T	L	L	A	C	V	S	*	S	S	D	C	W	D	T	G	E	CPPC	1	1.05897e-05
647	CPPC	T	R	G	C	E	A	L	Q	R	S	E	C	L	Y	V	G	E	CPPC	1	1.05897e-05
648	CPPC	T	R	W	P	C	D	P	D	I	G	I	C	E	S	G	F	Y	CPPC	1	1.05897e-05
649	CPPC	T	L	F	W	C	D	A	E	L	G	E	C	H	T	L	P	G	CPPC	1	1.05897e-05
650	CPPC	S	T	R	C	D	R	E	T	G	E	R	C	H	L	A	Q	T	CPPC	1	1.05897e-05
651	CPPC	R	T	R	C	D	R	E	T	G	E	R	C	L	L	A	Q	T	CPPC	1	1.05897e-05
652	CPPC	R	T	R	C	H	R	E	T	G	E	R	C	H	L	A	Q	T	CPPC	1	1.05897e-05
653	CPPC	R	T	R	C	E	R	E	T	G	E	R	C	H	L	A	Q	T	CPPC	1	1.05897e-05
654	CPPC	R	T	R	C	D	R	E	T	G	E	R	C	H	L	A	Q	T	CPPC	1	1.05897e-05
655	CPPC	R	T	R	C	D	Q	E	T	G	E	R	C	H	L	A	Q	T	CPPC	1	1.05897e-05
656	CPPC	R	T	R	C	D	R	E	T	G	E	R	C	H	L	A	Q	T	CPPC	1	1.05897e-05
657	CPPC	R	T	R	C	D	R	D	T	G	E	R	C	H	L	A	Q	T	CPPC	1	1.05897e-05
658	CPPC	R	T	R	C	D	R	E	N	G	E	R	C	H	L	A	Q	T	CPPC	1	1.05897e-05
659	CPPC	R	T	R	C	D	R	E	T	E	E	R	C	H	L	A	Q	T	CPPC	1	1.05897e-05
660	CPPC	R	T	R	C	D	R	E	T	E	E	R	C	H	L	A	Q	T	CPPC	1	1.05897e-05
661	CPPC	R	T	R	C	D	R	E	T	G	K	R	C	H	L	A	R	T	CPPC	1	1.05897e-05
662	CPPC	R	T	R	C	D	R	E	T	G	E	T	C	H	L	A	Q	T	CPPC	1	1.05897e-05
663	CPPC	R	T	R	C	D	R	E	T	G	E	R	G	H	L	A	Q	T	CPPC	1	1.05897e-05
664	CPPC	R	T	R	C	D	R	E	T	G	E	R	C	N	L	A	Q	T	CPPC	1	1.05897e-05
665	CPPC	R	T	R	C	D	R	E	T	G	E	R	C	Q	L	A	Q	T	CPPC	1	1.05897e-05
666	CPPC	R	T	R	C	D	R	E	T	G	E	R	C	Q	L	A	Q	T	CPPC	1	1.05897e-05
667	CPPC	R	T	R	C	D	R	E	T	G	E	R	C	H	R	A	Q	T	CPPC	1	1.05897e-05
668	CPPC	R	T	R	C	D	R	E	T	G	E	R	C	H	L	P	Q	T	CPPC	1	1.05897e-05
669	CPPC	R	T	R	C	D	R	E	T	G	E	R	C	H	L	D	Q	T	CPPC	1	1.05897e-05
670	CPPC	R	T	R	C	D	R	E	T	G	E	R	C	H	L	A	Q	T	CPPC	1	1.05897e-05
671	CPPC	R	T	R	C	D	R	E	T	G	E	R	C	H	L	A	Q	K	CPPC	1	1.05897e-05
672	CPPC	R	T	R	C	D	R	E	T	G	E	R	C	H	L	A	Q	T	CPPC	1	1.05897e-05
673	CPPC	R	T	R	C	D	R	E	T	G	E	R	C	H	L	A	Q	T	CPPC	1	1.05897e-05
674	CPPC	R	T	R	C	D	R	E	T	G	E	R	C	H	L	A	Q	T	CPPC	1	1.05897e-05
675	CPPC	R	T	R	C	D	R	E	T	G	E	R	C	H	L	S	H	T	CPPC	1	1.05897e-05
676	CPPC	R	T	R	C	D	R	E	T	G	E	R	C	D	L	A	Q	T	CPPC	1	1.05897e-05
677	CPPC	R	T	R	C	D	R	E	T	G	E	R	C	Y	L	T	Q	T	CPPC	1	1.05897e-05
678	CPPC	R	T	R	C	D	R	E	T	G	E	R	W	H	L	A	Q	T	CPPC	1	1.05897e-05
679	CPPC	R	T	R	C	D	R	E	T	G	E	R	C	H	L	A	Q	A	CPPC	1	1.05897e-05
680	CPPC	R	T	R	C	D	R	E	T	G	E	R	F	H	L	A	Q	T	CPPC	1	1.05897e-05
681	CPPC	R	T	R	C	D	R	E	T	G	E	R	C	H	L	A	Q	T	CPPC	1	1.05897e-05
682	CPPC	R	T	R	C	D	R	E	S	G	E	R	C	H	L	A	Q	T	CPPC	1	1.05897e-05
683	CPPC	R	T	R	C	D	R	E	S	G	E	R	C	H	L	A	Q	S	CPPC	1	1.05897e-05
684	CPPC	R	T	R	C	D	R	E	S	G	G	R	C	H	L	A	Q	T	CPPC	1	1.05897e-05
685	CPPC	R	T	R	C	D	R	E	T	G	E	R	C	H	L	A	Q	T	CPPC	1	1.05897e-05
686	CPPC	R	T	R	C	D	W	E	T	G	E	R	C	P	L	A	Q	T	CPPC	1	1.05897e-05
687	CPPC	R	T	R	C	D	R	E	T	G	E	R	C	H	L	A	Q	A	CPPC	1	1.05897e-05
688	CPPC	R	T	R	F	D	R	E	T	G	E	R	C	H	L	A	E	T	CPPC	1	1.05897e-05
689	CPPC	R	P	R	C	D	R	E	T	G	E	R	C	H	L	A	Q	T	CPPC	1	1.05897e-05
690	CPPC	R	R	W	E	C	Y	T	M	S	R	C	L	P	V	R	V	E	CPPC	1	1.05897e-05
691	CPPC	R	R	P	C	R	P	P	S	L	A	C	C	E	A	T	S	S	CPPC	1	1.05897e-05
692	CPPC	R	A	S	C	R	D	V	E	T	G	E	C	E	R	R	Y	Q	CPPC	1	1.05897e-05
693	CPPC	R	A	R	C	D	R	E	T	G	D	R	C	H	L	A	Q	T	CPPC	1	1.05897e-05
694	CPPC	R	E	T	Q	C	V	P	V	F	W	E	C	W	E	T	G	E	CPPC	1	1.05897e-05
695	CPPC	R	S	L	A	C	V	S	*	S	S	D	C	W	D	T	G	E	CPPC	1	1.05897e-05
696	CPPC	R	L	L	A	C	V	S	*	S	S	D	C	W	D	T	G	E	CPPC	1	1.05897e-05
697	CPPC	R	L	L	A	C	V	I	W	G	E	C	S	T	P	E	K	E	CPPC	1	1.05897e-05
698	CPPC	R	L	L	A	C	V	P	*	S	S	D	C	W	D	T	G	E	CPPC	1	1.05897e-05
699	CPPC	R	L	L	A	C	V	S	*	S	S	D	C	W	D	T	G	E	CPPC	1	1.05897e-05
700	CPPC	R	L	L	A	C	V	S	*	S	S	D	C	W	D	T	G	E	CPPC	1	1.05897e-05
701	CPPC	R	L	L	A	C	V	S	*	S	S	D	C	W	D	T	G	E	CPPC	1	1.05897e-05
702	CPPC	R	L	L	A	C	V	S	*	S	S	D	C	W	N	T	G	E	CPPC	1	1.05897e-05
703	CPPC	R	L	L	A	C	V	S	*	S	S	D	C	W	D	T	G	E	CPPC	1	1.05897e-05
704	CPPC	R	L	L	A	C	V	S	*	S	S	D	C	W	D	T	R	E	CPPC	1	1.05897e-05
705	CPPC	R	L	L	A	C	V	S	*	S	S	D	C	W	D	T	G	Q	CPPC	1	1.05897e-05
706	CPPC	R	L	L	A	C	V	S	*	S	S	D	C	W	D	T	G	E	CPPC	1	1.05897e-05
707	CPPC	R	L	L	A	C	V	S	*	S	S	D	C	W	D	T	G	E	CPPC	1	1.05897e-05
708	CPPC	R	L	L	A	C	V	S	*	S	S	D	C	W	D	T	G	G	CPPC	1	1.05897e-05
709	CPPC	R	L	L	A	C	V	S	*	S	S	D	C	W	D	M	G	E	CPPC	1	1.05897e-05
710	CPPC	R	L	L	A	C	V	S	*	S	S	D	C	W	D	S	G	E	CPPC	1	1.05897e-05
711	CPPC	R	L	L	A	C	V	S	*	S	S	D	C	W	Y	T	G	E	CPPC	1	1.05897e-05
712	CPPC	R	L	L	A	C	V	S	*	S	S	G	C	W	D	T	G	E	CPPC	1	1.05897e-05
713	CPPC	R	L	L	A	C	V	S	*	S	S	V	C	W	D	T	G	E	CPPC	1	1.05897e-05
714	CPPC	R	L	L	A	C	V	S	*	I	S	D	C	W	D	T	G	E	CPPC	1	1.05897e-05
715	CPPC	R	L	L	A	C	V	S	W	S	S	D	C	A	E	T	G	E	CPPC	1	1.05897e-05
716	CPPC	R	L	L	A	C	V	S	W	S	S	D	C	W	D	T	G	E	CPPC	1	1.05897e-05
717	CPPC	R	L	L	G	C	V	S	*	S	S	D	C	W	D	T	G	E	CPPC	1	1.05897e-05
718	CPPC	R	F	L	A	C	V	S	*	S	S	D	C	W	D	T	G	E	CPPC	1	1.05897e-05
719	CPPC	S	N	H	P	C	P	T	N	V	H	C	M	S	S	Q	E	H	CPPC	1	1.05897e-05
720	CPPC	S	L	T	V	C	A	E	T	G	E	E	C	T	S	E	F	Q	CPPC	1	1.05897e-05
721	CPPC	S	D	C	G	L	I	C	S	A	W	E	C	W	W	V	G	H	CPPC	1	1.05897e-05
722	CPPC	S	G	N	K	C	V	R	T	A	N	Q	C	S	E	E	V	G	CPPC	1	1.05897e-05
723	CPPC	M	H	P	K	C	Q	E	D	T	D	R	C	W	W	E	E	Y	CPPC	1	1.05897e-05
724	CPPC	M	A	S	C	R	D	V	E	T	G	E	C	E	R	R	Y	Q	CPPC	1	1.05897e-05
725	CPPC	M	A	S	C	L	W	D	E	Y	G	E	C	E	Y	M	M	P	CPPC	1	1.05897e-05
726	CPPC	M	G	C	A	R	P	R	G	C	E	S	Y	C	L	L	T	G	CPPC	1	1.05897e-05
727	CPPC	I	P	E	L	C	C	V	D	P	P	C	W	P	C	G	L	G	CPPC	1	1.05897e-05
728	CPPC	I	G	C	R	R	V	Q	V	W	S	L	C	R	I	R	E	A	CPPC	1	1.05897e-05
729	CPPC	I	L	F	T	C	T	V	F	I	E	C	L	R	G	S	F	L	CPPC	1	1.05897e-05
730	CPPC	Q	R	C	I	L	G	R	W	*	S	R	C	W	F	A	D	E	CPPC	1	1.05897e-05
731	CPPC	Q	S	G	G	C	M	M	L	L	S	C	C	L	P	P	L	P	CPPC	1	1.05897e-05
732	CPPC	Q	P	E	C	S	Y	G	L	F	C	E	D	V	F	D	V	V	CPPC	1	1.05897e-05
733	CPPC	Q	P	T	C	L	D	N	D	T	G	E	C	A	V	L	E	G	CPPC	1	1.05897e-05
734	CPPC	Q	P	R	E	C	P	E	C	R	G	C	T	L	E	C	A	P	CPPC	1	1.05897e-05
735	CPPC	Q	L	T	C	L	S	S	E	R	L	T	C	P	F	V	G	C	CPPC	1	1.05897e-05
736	CPPC	Q	L	T	C	L	S	S	E	R	V	T	C	P	F	V	G	C	CPPC	1	1.05897e-05
737	CPPC	Q	A	C	P	Q	N	R	E	V	L	L	C	T	E	L	T	H	CPPC	1	1.05897e-05
738	CPPC	Q	A	C	A	T	D	I	E	T	G	E	C	A	G	Q	E	R	CPPC	1	1.05897e-05
739	CPPC	Q	V	Q	C	I	T	S	S	S	T	E	C	R	F	G	S	L	CPPC	1	1.05897e-05
740	CPPC	Q	S	C	F	R	E	R	L	F	S	L	C	L	L	S	W	E	CPPC	1	1.05897e-05
741	CPPC	Q	W	V	C	T	P	S	P	W	V	L	C	A	A	S	R	G	CPPC	1	1.05897e-05
742	CPPC	H	T	A	R	C	P	S	Q	T	L	C	V	S	E	E	D	I	CPPC	1	1.05897e-05
743	CPPC	H	R	P	C	G	V	V	L	I	F	E	C	I	S	M	T	G	CPPC	1	1.05897e-05
744	CPPC	H	R	A	W	E	C	H	E	T	G	E	C	D	L	P	V	Y	CPPC	1	1.05897e-05
745	CPPC	H	V	E	C	P	G	A	F	S	V	A	C	V	E	T	G	I	CPPC	1	1.05897e-05
746	CPPC	H	V	E	C	P	G	A	F	S	V	A	C	V	E	A	G	I	CPPC	1	1.05897e-05
747	CPPC	H	W	A	W	E	C	H	E	T	G	E	C	D	L	P	V	N	CPPC	1	1.05897e-05
748	CPPC	H	W	A	W	E	C	H	G	T	G	E	C	D	L	P	V	Y	CPPC	1	1.05897e-05
749	CPPC	P	R	N	L	C	S	S	L	G	Q	L	C	L	Y	D	S	E	CPPC	1	1.05897e-05
750	CPPC	P	R	W	A	C	M	S	F	G	G	P	C	Q	N	P	E	S	CPPC	1	1.05897e-05
751	CPPC	P	L	W	R	C	L	A	F	S	E	C	E	R	E	W	A	T	CPPC	1	1.05897e-05
752	CPPC	P	A	L	C	E	D	I	D	L	G	V	C	S	Q	V	F	E	CPPC	1	1.05897e-05
753	CPPC	P	V	L	C	E	D	I	D	L	G	V	C	S	H	V	F	E	CPPC	1	1.05897e-05
754	CPPC	P	E	L	C	Q	Q	A	T	G	H	M	C	S	R	K	L	R	CPPC	1	1.05897e-05
755	CPPC	P	S	Y	E	C	W	R	G	R	R	P	C	P	S	G	E	S	CPPC	1	1.05897e-05
756	CPPC	P	S	C	R	S	R	E	T	G	E	R	Y	G	F	V	W	A	CPPC	1	1.05897e-05
757	CPPC	P	S	C	R	S	R	E	T	G	E	R	C	G	F	L	W	A	CPPC	1	1.05897e-05
758	CPPC	P	S	C	R	S	R	E	T	G	E	R	C	G	F	A	W	A	CPPC	1	1.05897e-05
759	CPPC	P	S	C	R	S	R	E	T	G	E	R	C	G	F	V	W	A	CPPC	1	1.05897e-05
760	CPPC	P	S	C	R	S	R	E	T	G	E	R	C	G	F	V	W	A	CPPC	1	1.05897e-05
761	CPPC	P	S	C	R	S	R	E	T	V	E	R	C	G	F	V	W	A	CPPC	1	1.05897e-05
762	CPPC	P	W	M	E	K	C	S	W	D	P	E	C	A	H	T	W	A	CPPC	1	1.05897e-05
763	CPPC	P	L	W	C	M	L	P	H	E	C	S	W	A	S	E	R	P	CPPC	1	1.05897e-05
764	CPPC	P	N	C	C	P	A	R	S	S	L	L	C	E	A	D	W	E	CPPC	1	1.05897e-05
765	CPPC	P	S	S	W	L	C	I	F	F	D	E	C	R	F	F	N	T	CPPC	1	1.05897e-05
766	CPPC	P	P	C	L	R	I	E	W	C	V	R	S	C	R	Q	W	R	CPPC	1	1.05897e-05
767	CPPC	P	R	E	C	A	Q	A	F	T	T	I	C	V	W	Y	R	A	CPPC	1	1.05897e-05
768	CPPC	P	R	L	R	C	G	V	V	V	L	C	T	A	K	E	S	W	CPPC	1	1.05897e-05
769	CPPC	P	G	G	C	L	E	G	V	R	S	R	C	L	Y	G	T	E	CPPC	1	1.05897e-05
770	CPPC	P	V	C	L	L	T	R	A	W	V	I	C	E	W	G	Y	R	CPPC	1	1.05897e-05
771	CPPC	R	S	E	C	S	M	I	E	G	T	T	C	H	P	S	R	T	CPPC	1	1.05897e-05
772	CPPC	R	Q	A	L	C	D	E	E	S	G	E	C	P	Y	L	W	I	CPPC	1	1.05897e-05
773	CPPC	R	Q	A	L	C	D	E	E	S	G	E	C	P	Y	L	W	I	CPPC	1	1.05897e-05
774	CPPC	R	Q	A	L	C	D	E	E	S	G	E	C	P	Y	L	W	V	CPPC	1	1.05897e-05
775	CPPC	R	P	L	C	E	E	S	G	E	E	P	C	H	P	L	G	N	CPPC	1	1.05897e-05
776	CPPC	R	R	E	C	L	P	D	V	W	T	D	C	M	E	L	G	I	CPPC	1	1.05897e-05
777	CPPC	R	R	E	C	L	P	D	V	W	T	D	C	M	E	V	G	I	CPPC	1	1.05897e-05
778	CPPC	R	A	R	C	G	A	A	E	W	L	A	C	C	N	R	L	V	CPPC	1	1.05897e-05
779	CPPC	R	A	S	C	E	S	S	G	T	V	E	C	H	Q	A	S	V	CPPC	1	1.05897e-05
780	CPPC	R	A	C	A	T	D	I	E	T	G	E	C	A	G	Q	E	R	CPPC	1	1.05897e-05
781	CPPC	R	A	C	A	T	D	I	E	T	G	E	C	A	G	Q	E	R	CPPC	1	1.05897e-05
782	CPPC	R	A	C	A	T	D	I	E	T	R	E	C	A	G	Q	E	R	CPPC	1	1.05897e-05
783	CPPC	R	A	C	A	T	D	I	E	T	G	E	C	A	G	Q	E	R	CPPC	1	1.05897e-05
784	CPPC	R	A	C	A	T	D	I	E	T	G	E	C	A	G	Q	E	R	CPPC	1	1.05897e-05
785	CPPC	R	A	C	A	T	D	I	E	T	G	E	S	A	G	Q	E	R	CPPC	1	1.05897e-05
786	CPPC	R	A	C	A	T	D	I	E	T	G	E	C	T	G	Q	E	R	CPPC	1	1.05897e-05
787	CPPC	R	A	C	A	T	D	I	E	T	G	E	C	A	G	Q	E	R	CPPC	1	1.05897e-05
788	CPPC	R	A	C	A	T	D	I	E	T	G	E	C	A	G	Q	E	R	CPPC	1	1.05897e-05
789	CPPC	R	A	C	A	T	D	I	E	T	G	E	C	A	G	Q	E	R	CPPC	1	1.05897e-05
790	CPPC	R	A	C	A	T	D	I	E	T	G	E	C	S	G	Q	E	R	CPPC	1	1.05897e-05
791	CPPC	R	A	C	A	T	D	I	E	T	G	E	W	A	G	Q	E	R	CPPC	1	1.05897e-05
792	CPPC	R	A	C	A	T	D	I	E	T	G	E	C	A	G	Q	E	R	CPPC	1	1.05897e-05
793	CPPC	R	A	C	A	T	D	I	E	T	G	V	C	A	G	Q	E	R	CPPC	1	1.05897e-05
794	CPPC	R	A	C	A	T	D	I	E	T	C	E	C	A	G	Q	E	R	CPPC	1	1.05897e-05
795	CPPC	R	A	C	A	T	D	I	E	M	G	E	C	A	G	Q	E	S	CPPC	1	1.05897e-05
796	CPPC	R	A	C	A	T	D	I	E	S	G	E	C	A	G	Q	E	R	CPPC	1	1.05897e-05
797	CPPC	R	A	C	A	T	D	I	V	T	G	E	C	A	G	Q	E	R	CPPC	1	1.05897e-05
798	CPPC	R	A	C	A	T	D	V	E	T	G	E	C	A	G	Q	E	R	CPPC	1	1.05897e-05
799	CPPC	R	A	C	A	S	D	I	E	T	G	E	C	A	G	Q	E	R	CPPC	1	1.05897e-05
800	CPPC	R	A	C	V	T	D	I	E	T	G	E	C	A	G	Q	E	R	CPPC	1	1.05897e-05
801	CPPC	R	A	C	S	T	D	I	E	T	G	E	C	A	G	Q	E	H	CPPC	1	1.05897e-05
802	CPPC	R	A	C	S	T	D	I	E	T	G	E	C	A	G	Q	E	R	CPPC	1	1.05897e-05
803	CPPC	R	V	C	P	E	E	G	S	C	A	F	L	R	C	R	Y	R	CPPC	1	1.05897e-05
804	CPPC	R	V	C	P	E	E	G	S	C	A	F	L	R	C	R	Y	G	CPPC	1	1.05897e-05
805	CPPC	R	E	T	Q	C	V	P	G	F	W	E	C	W	E	T	G	E	CPPC	1	1.05897e-05
806	CPPC	R	E	T	Q	C	V	P	V	V	W	E	C	W	E	T	G	E	CPPC	1	1.05897e-05
807	CPPC	R	E	T	Q	C	V	P	V	C	W	E	C	W	E	T	G	E	CPPC	1	1.05897e-05
808	CPPC	R	E	T	Q	C	V	P	V	F	W	K	C	W	E	T	G	E	CPPC	1	1.05897e-05
809	CPPC	R	E	T	Q	C	V	P	V	F	W	E	Y	W	E	T	G	E	CPPC	1	1.05897e-05
810	CPPC	R	E	T	Q	C	V	P	V	F	W	E	C	R	E	T	G	E	CPPC	1	1.05897e-05
811	CPPC	R	E	T	Q	C	V	P	V	F	W	E	C	E	E	T	G	E	CPPC	1	1.05897e-05
812	CPPC	R	E	T	Q	C	V	P	V	F	W	E	C	W	E	T	G	E	CPPC	1	1.05897e-05
813	CPPC	R	E	T	Q	C	V	P	V	F	W	E	C	W	E	T	G	E	CPPC	1	1.05897e-05
814	CPPC	R	E	T	Q	C	V	P	V	F	W	E	C	W	E	A	G	E	CPPC	1	1.05897e-05
815	CPPC	R	E	T	Q	C	V	P	V	F	W	E	C	W	E	T	G	E	CPPC	1	1.05897e-05
816	CPPC	R	E	T	Q	C	V	P	V	F	W	V	C	W	E	T	G	E	CPPC	1	1.05897e-05
817	CPPC	R	E	T	E	C	V	P	V	F	W	E	C	W	E	T	G	E	CPPC	1	1.05897e-05
818	CPPC	R	E	S	Q	C	V	P	V	F	W	E	C	W	E	T	G	E	CPPC	1	1.05897e-05
819	CPPC	R	E	S	C	K	D	P	E	L	G	D	C	F	T	E	A	N	CPPC	1	1.05897e-05
820	CPPC	R	E	S	C	K	D	P	D	L	R	D	C	F	T	E	A	N	CPPC	1	1.05897e-05
821	CPPC	R	E	S	C	K	D	P	D	L	G	D	C	F	T	E	A	N	CPPC	1	1.05897e-05
822	CPPC	R	E	S	C	K	D	P	D	L	G	N	C	F	T	E	A	N	CPPC	1	1.05897e-05
823	CPPC	R	E	S	C	K	D	P	D	L	G	D	C	F	T	E	A	N	CPPC	1	1.05897e-05
824	CPPC	R	E	S	C	K	D	P	D	L	G	D	C	L	T	E	A	N	CPPC	1	1.05897e-05
825	CPPC	R	E	S	C	K	D	P	D	L	G	D	C	S	T	E	A	N	CPPC	1	1.05897e-05
826	CPPC	R	E	S	C	K	D	P	D	L	G	D	C	F	T	E	A	N	CPPC	1	1.05897e-05
827	CPPC	R	E	S	C	K	D	P	D	L	G	D	C	F	T	E	A	S	CPPC	1	1.05897e-05
828	CPPC	R	E	C	R	M	S	R	A	A	F	D	C	P	L	L	I	G	CPPC	1	1.05897e-05
829	CPPC	R	L	C	R	A	C	R	V	C	F	V	G	P	G	L	A	E	CPPC	1	1.05897e-05
830	CPPC	R	L	C	G	N	P	C	L	M	L	E	C	A	F	A	E	F	CPPC	1	1.05897e-05
831	CPPC	R	F	C	E	A	D	W	G	Y	V	W	C	L	F	L	R	W	CPPC	1	1.05897e-05
832	CPPC	R	T	R	C	I	L	G	F	L	D	M	C	L	V	R	T	R	CPPC	1	1.05897e-05
833	CPPC	R	T	P	R	C	G	G	F	G	D	E	C	G	V	T	R	G	CPPC	1	1.05897e-05
834	CPPC	R	P	N	C	H	S	R	E	G	F	R	C	E	Q	L	E	L	CPPC	1	1.05897e-05
835	CPPC	R	P	V	C	A	I	A	P	A	C	R	S	P	E	T	G	E	CPPC	1	1.05897e-05
836	CPPC	R	R	I	W	C	G	W	E	W	D	Y	C	T	Y	R	Y	I	CPPC	1	1.05897e-05
837	CPPC	R	R	L	C	N	R	K	A	R	C	C	R	P	E	V	V	C	CPPC	1	1.05897e-05
838	CPPC	R	R	S	E	C	E	T	H	E	G	C	V	G	S	G	P	V	CPPC	1	1.05897e-05
839	CPPC	R	L	E	C	L	P	A	E	F	L	G	C	L	A	L	M	R	CPPC	1	1.05897e-05
840	CPPC	R	L	C	E	P	V	P	S	T	G	R	C	R	R	A	F	E	CPPC	1	1.05897e-05
841	CPPC	R	E	A	G	C	T	A	H	T	T	C	D	L	E	L	G	E	CPPC	1	1.05897e-05
842	CPPC	R	E	A	G	C	T	A	H	T	T	R	D	L	E	L	G	E	CPPC	1	1.05897e-05
843	CPPC	R	E	A	G	C	T	A	H	T	T	C	E	L	E	L	G	E	CPPC	1	1.05897e-05
844	CPPC	R	E	A	G	C	T	A	H	T	T	C	D	L	E	L	G	E	CPPC	1	1.05897e-05
845	CPPC	R	E	A	G	C	T	A	H	T	T	C	D	L	E	M	G	E	CPPC	1	1.05897e-05
846	CPPC	R	E	A	G	C	T	A	H	T	T	C	D	L	E	Q	G	E	CPPC	1	1.05897e-05
847	CPPC	R	E	A	G	C	T	A	H	T	T	C	D	L	E	P	G	E	CPPC	1	1.05897e-05
848	CPPC	R	E	A	G	C	T	A	H	T	T	C	D	L	E	L	G	K	CPPC	1	1.05897e-05
849	CPPC	R	E	A	G	C	T	A	H	T	T	C	D	L	E	L	G	E	CPPC	1	1.05897e-05
850	CPPC	R	E	A	G	C	T	A	H	T	T	W	D	L	E	L	G	E	CPPC	1	1.05897e-05
851	CPPC	R	E	A	G	C	T	A	H	T	A	C	D	L	E	L	G	E	CPPC	1	1.05897e-05
852	CPPC	R	E	A	G	C	T	A	H	M	T	C	D	L	E	L	G	E	CPPC	1	1.05897e-05
853	CPPC	R	E	A	W	C	T	A	H	T	T	C	D	L	E	L	G	E	CPPC	1	1.05897e-05
854	CPPC	R	A	V	Q	C	N	S	P	R	L	E	C	P	G	L	R	E	CPPC	1	1.05897e-05
855	CPPC	R	A	G	C	C	I	R	A	F	A	D	C	E	S	L	G	A	CPPC	1	1.05897e-05
856	CPPC	R	G	C	W	R	K	A	N	L	C	E	C	I	W	R	G	E	CPPC	1	1.05897e-05
857	CPPC	R	E	R	C	G	F	L	E	V	E	E	C	T	K	V	F	G	CPPC	1	1.05897e-05
858	CPPC	R	S	R	A	C	R	E	R	C	R	R	C	S	K	M	H	S	CPPC	1	1.05897e-05
859	CPPC	R	S	L	C	R	V	A	E	G	C	D	P	E	T	G	G	G	CPPC	1	1.05897e-05
860	CPPC	R	C	C	E	V	Q	R	Y	C	Q	S	C	S	E	Y	G	W	CPPC	1	1.05897e-05
861	CPPC	L	T	Y	E	C	T	S	P	N	P	V	C	L	I	L	F	I	CPPC	1	1.05897e-05
862	CPPC	L	R	Y	C	A	E	P	A	M	C	R	G	R	S	G	S	R	CPPC	1	1.05897e-05
863	CPPC	L	R	S	C	R	S	R	L	R	G	F	C	T	E	T	R	A	CPPC	1	1.05897e-05
864	CPPC	L	Q	C	P	W	T	A	L	C	E	R	G	E	R	V	P	E	CPPC	1	1.05897e-05
865	CPPC	L	L	F	T	C	T	G	G	V	R	E	C	R	W	R	P	L	CPPC	1	1.05897e-05
866	CPPC	L	A	C	A	T	D	I	E	T	G	E	C	A	G	Q	E	R	CPPC	1	1.05897e-05
867	CPPC	L	V	C	T	R	R	R	N	C	D	L	L	G	Y	V	E	C	CPPC	1	1.05897e-05
868	CPPC	L	E	C	L	H	L	P	W	C	F	G	S	L	C	G	Q	I	CPPC	1	1.05897e-05
869	CPPC	L	E	C	V	L	W	R	V	H	W	S	C	D	G	S	S	G	CPPC	1	1.05897e-05
870	CPPC	L	P	G	I	C	M	R	V	H	V	S	C	L	G	C	L	G	CPPC	1	1.05897e-05
871	CPPC	L	R	C	R	L	A	E	L	C	A	I	T	V	W	R	S	R	CPPC	1	1.05897e-05
872	CPPC	L	R	C	S	L	K	C	I	A	A	T	C	L	L	P	E	Y	CPPC	1	1.05897e-05
873	CPPC	L	L	E	G	C	L	V	E	E	W	D	C	S	A	T	G	E	CPPC	1	1.05897e-05
874	CPPC	L	L	E	G	C	L	L	E	Y	R	D	C	S	A	T	G	E	CPPC	1	1.05897e-05
875	CPPC	L	L	E	G	C	L	L	E	Y	G	D	C	S	A	T	G	E	CPPC	1	1.05897e-05
876	CPPC	L	L	E	G	C	L	L	E	Y	E	D	C	S	A	T	G	E	CPPC	1	1.05897e-05
877	CPPC	L	L	E	G	C	L	L	E	Y	W	D	C	S	A	T	G	K	CPPC	1	1.05897e-05
878	CPPC	L	L	E	G	C	L	L	E	Y	W	D	C	S	A	T	G	E	CPPC	1	1.05897e-05
879	CPPC	L	L	E	G	C	L	L	E	Y	W	D	C	S	A	T	G	G	CPPC	1	1.05897e-05
880	CPPC	L	L	E	G	C	L	L	E	Y	W	G	C	S	A	T	G	E	CPPC	1	1.05897e-05
881	CPPC	L	L	E	G	C	L	L	E	Y	W	D	C	S	A	T	G	E	CPPC	1	1.05897e-05
882	CPPC	L	V	A	E	C	V	P	L	R	R	V	C	K	L	T	L	W	CPPC	1	1.05897e-05
883	CPPC	L	W	V	P	C	F	L	P	E	F	V	C	E	R	H	R	N	CPPC	1	1.05897e-05
884	CPPC	L	W	C	A	K	C	W	L	S	R	W	C	S	E	R	M	S	CPPC	1	1.05897e-05
885	CPPC	L	F	D	C	V	Y	K	E	W	F	E	C	S	V	V	V	W	CPPC	1	1.05897e-05
886	CPPC	E	T	R	C	E	S	L	G	S	C	D	A	S	S	G	A	L	CPPC	1	1.05897e-05
887	CPPC	E	T	R	C	E	S	L	G	S	C	D	A	I	S	G	A	L	CPPC	1	1.05897e-05
888	CPPC	E	T	G	C	E	S	L	G	S	C	D	A	I	S	G	A	L	CPPC	1	1.05897e-05
889	CPPC	E	L	K	K	C	Y	N	E	R	E	H	C	Y	Q	D	Y	L	CPPC	1	1.05897e-05
890	CPPC	E	A	C	R	Q	R	S	N	C	S	Q	A	R	S	E	P	M	CPPC	1	1.05897e-05
891	CPPC	E	G	D	C	G	M	V	W	R	L	P	C	R	E	R	S	L	CPPC	1	1.05897e-05
892	CPPC	E	G	A	C	A	S	G	D	L	P	S	C	E	E	T	G	E	CPPC	1	1.05897e-05
893	CPPC	E	G	A	C	A	S	V	D	L	P	S	C	E	E	T	G	E	CPPC	1	1.05897e-05
894	CPPC	E	G	A	C	A	S	V	D	P	P	S	C	E	E	T	G	E	CPPC	1	1.05897e-05
895	CPPC	E	G	A	C	A	S	V	D	L	P	S	C	E	E	T	G	E	CPPC	1	1.05897e-05
896	CPPC	E	G	A	C	A	S	V	D	L	P	S	C	E	E	A	G	E	CPPC	1	1.05897e-05
897	CPPC	D	T	R	F	C	L	V	V	L	W	E	C	L	A	G	L	H	CPPC	1	1.05897e-05
898	CPPC	D	S	G	C	S	P	E	T	G	E	F	C	W	R	E	D	D	CPPC	1	1.05897e-05
899	CPPC	D	R	Y	C	V	S	L	S	G	Q	C	C	P	V	S	E	E	CPPC	1	1.05897e-05
900	CPPC	D	E	C	D	T	N	K	V	C	E	S	H	M	R	L	P	N	CPPC	1	1.05897e-05
901	CPPC	A	R	G	C	S	P	E	T	G	E	F	C	W	R	E	D	D	CPPC	1	1.05897e-05
902	CPPC	A	S	G	C	S	P	K	T	G	E	F	C	W	R	E	D	D	CPPC	1	1.05897e-05
903	CPPC	A	S	G	C	S	P	E	T	E	E	F	C	W	R	E	D	D	CPPC	1	1.05897e-05
904	CPPC	A	S	G	C	S	P	E	T	G	E	F	C	G	R	E	D	D	CPPC	1	1.05897e-05
905	CPPC	A	S	G	C	S	P	E	T	G	E	F	C	W	R	E	D	D	CPPC	1	1.05897e-05
906	CPPC	A	P	S	C	A	E	T	G	E	C	R	F	S	W	F	E	G	CPPC	1	1.05897e-05
907	CPPC	A	R	S	G	C	P	A	I	S	M	C	E	G	L	S	L	E	CPPC	1	1.05897e-05
908	CPPC	A	S	V	C	R	T	T	W	M	C	T	R	T	Y	E	C	L	CPPC	1	1.05897e-05
909	CPPC	A	N	G	C	S	P	E	T	G	Q	F	C	W	R	E	D	D	CPPC	1	1.05897e-05
910	CPPC	A	T	A	C	S	C	T	F	F	L	H	C	R	N	E	C	C	CPPC	1	1.05897e-05
911	CPPC	A	T	C	G	S	T	C	C	C	G	S	V	V	C	P	E	Y	CPPC	1	1.05897e-05
912	CPPC	A	R	G	C	S	P	E	T	G	E	F	C	W	R	E	D	D	CPPC	1	1.05897e-05
913	CPPC	A	S	G	C	S	P	E	T	G	E	F	C	W	R	E	D	D	CPPC	1	1.05897e-05
914	CPPC	A	S	G	C	S	P	E	T	G	E	F	C	W	R	E	D	D	CPPC	1	1.05897e-05
915	CPPC	A	S	G	C	S	P	E	T	G	E	F	C	W	R	E	Y	D	CPPC	1	1.05897e-05
916	CPPC	A	S	G	C	S	P	E	T	G	G	F	C	W	R	E	D	D	CPPC	1	1.05897e-05
917	CPPC	A	R	C	F	R	R	A	R	S	P	S	C	L	V	E	T	R	CPPC	1	1.05897e-05
918	CPPC	A	S	R	C	S	P	E	T	G	E	F	C	W	R	E	D	D	CPPC	1	1.05897e-05
919	CPPC	A	S	A	C	S	P	E	T	G	E	F	C	W	R	E	D	D	CPPC	1	1.05897e-05
920	CPPC	A	S	G	C	S	P	E	T	G	E	F	C	W	R	E	D	D	CPPC	1	1.05897e-05
921	CPPC	A	S	G	R	S	P	E	T	V	E	F	C	W	R	E	D	D	CPPC	1	1.05897e-05
922	CPPC	A	S	G	G	S	P	E	T	G	E	F	C	W	R	E	D	D	CPPC	1	1.05897e-05
923	CPPC	A	S	G	*	S	P	E	T	G	E	F	C	R	R	E	D	D	CPPC	1	1.05897e-05
924	CPPC	A	S	G	*	S	P	E	T	G	E	F	C	W	R	E	D	D	CPPC	1	1.05897e-05
925	CPPC	A	S	G	C	S	P	E	T	G	E	F	C	W	R	K	D	D	CPPC	1	1.05897e-05
926	CPPC	A	S	G	C	S	P	E	T	G	E	F	C	W	R	S	D	D	CPPC	1	1.05897e-05
927	CPPC	A	S	G	C	S	P	E	T	G	E	R	C	H	L	A	Q	T	CPPC	1	1.05897e-05
928	CPPC	A	S	G	C	S	P	E	T	R	E	F	C	W	R	E	D	D	CPPC	1	1.05897e-05
929	CPPC	A	S	G	C	S	P	E	T	A	E	F	C	W	R	E	D	D	CPPC	1	1.05897e-05
930	CPPC	A	S	G	C	S	P	E	T	G	E	L	C	W	R	K	D	D	CPPC	1	1.05897e-05
931	CPPC	A	S	G	C	S	P	E	T	G	E	L	C	W	R	E	D	N	CPPC	1	1.05897e-05
932	CPPC	A	S	G	C	S	P	E	T	G	E	F	S	W	R	Q	D	D	CPPC	1	1.05897e-05
933	CPPC	A	S	G	C	S	P	E	T	G	E	F	G	W	R	E	D	D	CPPC	1	1.05897e-05
934	CPPC	A	S	G	C	S	P	E	T	G	E	F	C	T	R	E	D	D	CPPC	1	1.05897e-05
935	CPPC	A	S	G	C	S	P	E	T	G	E	F	C	R	R	E	N	D	CPPC	1	1.05897e-05
936	CPPC	A	S	G	C	S	P	E	T	G	E	F	C	C	T	E	D	D	CPPC	1	1.05897e-05
937	CPPC	A	S	G	C	S	P	E	T	G	E	F	C	W	K	E	D	D	CPPC	1	1.05897e-05
938	CPPC	A	S	G	C	S	P	E	T	G	E	F	C	W	R	*	D	D	CPPC	1	1.05897e-05
939	CPPC	A	S	G	C	S	P	E	T	G	E	F	C	W	R	E	N	G	CPPC	1	1.05897e-05
940	CPPC	A	S	G	C	S	P	E	T	G	E	F	C	W	R	E	D	D	CPPC	1	1.05897e-05
941	CPPC	A	S	G	C	S	P	E	T	G	E	F	C	W	R	E	D	D	CPPC	1	1.05897e-05
942	CPPC	A	S	G	C	S	P	E	T	G	E	F	C	W	R	E	D	D	CPPC	1	1.05897e-05
943	CPPC	A	S	G	C	S	P	E	T	G	E	F	C	W	R	E	D	A	CPPC	1	1.05897e-05
944	CPPC	A	S	G	C	S	P	E	T	G	E	F	C	W	R	E	G	E	CPPC	1	1.05897e-05
945	CPPC	A	S	G	C	S	P	E	T	G	E	F	C	W	S	E	D	D	CPPC	1	1.05897e-05
946	CPPC	A	S	G	C	S	P	E	T	G	E	F	C	W	E	T	G	E	CPPC	1	1.05897e-05
947	CPPC	A	S	G	C	S	P	E	T	G	E	F	C	W	D	T	G	E	CPPC	1	1.05897e-05
948	CPPC	A	S	G	C	S	P	E	T	G	E	F	C	W	G	Q	D	D	CPPC	1	1.05897e-05
949	CPPC	A	S	G	C	S	P	E	T	G	E	F	C	W	W	E	N	D	CPPC	1	1.05897e-05
950	CPPC	A	S	G	C	S	P	E	T	G	E	F	W	W	R	S	D	D	CPPC	1	1.05897e-05
951	CPPC	A	S	G	C	S	P	E	T	G	E	F	C	W	R	S	D	D	CPPC	1	1.05897e-05
952	CPPC	A	S	G	C	S	P	E	T	G	G	F	C	W	R	K	D	D	CPPC	1	1.05897e-05
953	CPPC	A	S	G	C	S	P	E	T	G	G	F	C	W	W	E	D	D	CPPC	1	1.05897e-05
954	CPPC	A	S	G	C	S	P	E	T	V	E	F	*	W	R	E	D	D	CPPC	1	1.05897e-05
955	CPPC	A	S	G	C	L	P	E	A	G	E	F	C	W	R	E	D	D	CPPC	1	1.05897e-05
956	CPPC	A	H	R	I	C	Y	P	P	G	D	G	C	C	T	E	A	E	CPPC	1	1.05897e-05
957	CPPC	A	H	R	I	C	Y	L	P	G	G	G	C	C	T	E	A	E	CPPC	1	1.05897e-05
958	CPPC	A	R	A	W	C	G	L	S	G	E	C	A	F	P	W	T	C	CPPC	1	1.05897e-05
959	CPPC	A	R	M	C	L	T	L	G	T	C	D	E	E	S	R	W	G	CPPC	1	1.05897e-05
960	CPPC	A	R	G	C	S	P	E	T	G	E	F	C	W	R	E	G	D	CPPC	1	1.05897e-05
961	CPPC	A	L	Q	E	C	W	F	L	P	C	P	C	S	R	E	S	E	CPPC	1	1.05897e-05
962	CPPC	A	L	V	C	E	Q	W	V	W	N	L	C	I	I	W	E	E	CPPC	1	1.05897e-05
963	CPPC	A	G	G	C	S	P	E	T	G	E	F	C	W	R	K	D	D	CPPC	1	1.05897e-05
964	CPPC	G	T	R	C	D	R	E	T	G	E	R	C	H	L	A	Q	T	CPPC	1	1.05897e-05
965	CPPC	G	T	R	Y	D	R	E	T	G	E	R	C	H	L	A	Q	A	CPPC	1	1.05897e-05
966	CPPC	G	T	E	H	C	R	R	T	R	D	C	D	M	D	I	G	Q	CPPC	1	1.05897e-05
967	CPPC	G	Q	L	E	C	Y	Y	E	L	G	C	G	T	E	I	R	W	CPPC	1	1.05897e-05
968	CPPC	G	H	P	C	E	Y	P	P	T	I	T	C	E	E	D	G	T	CPPC	1	1.05897e-05
969	CPPC	G	P	R	C	E	G	P	C	T	C	C	P	C	R	L	E	S	CPPC	1	1.05897e-05
970	CPPC	G	P	D	C	Y	L	R	C	A	R	E	C	R	L	F	C	S	CPPC	1	1.05897e-05
971	CPPC	G	A	V	C	V	E	W	T	W	M	N	C	L	I	M	H	A	CPPC	1	1.05897e-05
972	CPPC	G	A	E	C	S	T	W	A	Q	A	E	C	E	L	S	V	E	CPPC	1	1.05897e-05
973	CPPC	G	G	A	C	A	S	V	D	L	P	S	C	E	E	T	G	E	CPPC	1	1.05897e-05
974	CPPC	G	V	S	C	R	A	P	V	Q	L	W	C	G	Q	S	T	R	CPPC	1	1.05897e-05
975	CPPC	G	E	W	P	C	M	K	Y	E	F	C	R	K	G	H	P	H	CPPC	1	1.05897e-05
976	CPPC	G	F	A	E	C	Q	A	C	R	R	C	G	G	R	P	P	V	CPPC	1	1.05897e-05
977	CPPC	G	T	G	C	H	P	Q	F	P	C	A	Y	T	G	A	E	S	CPPC	1	1.05897e-05
978	CPPC	G	P	R	R	C	W	R	L	P	S	N	C	R	C	A	P	R	CPPC	1	1.05897e-05
979	CPPC	G	E	I	G	C	E	W	M	I	Y	M	C	Q	I	W	V	E	CPPC	1	1.05897e-05
980	CPPC	G	E	C	R	I	E	T	S	C	E	C	F	S	W	Y	A	D	CPPC	1	1.05897e-05
981	CPPC	G	S	P	C	N	R	P	G	A	C	F	Q	H	E	R	S	T	CPPC	1	1.05897e-05
982	CPPC	G	L	Y	E	C	T	R	S	Y	C	C	C	L	P	Y	L	Y	CPPC	1	1.05897e-05
983	CPPC	V	K	S	H	C	P	L	L	M	I	Y	C	A	E	T	G	E	CPPC	1	1.05897e-05
984	CPPC	V	T	Y	P	C	E	N	R	V	R	Q	C	S	T	L	I	P	CPPC	1	1.05897e-05
985	CPPC	V	R	C	W	L	R	P	S	L	L	E	C	V	F	G	S	S	CPPC	1	1.05897e-05
986	CPPC	V	R	E	C	K	V	R	P	E	S	D	C	G	A	T	G	E	CPPC	1	1.05897e-05
987	CPPC	V	L	E	C	K	V	R	P	E	S	D	C	G	A	T	G	E	CPPC	1	1.05897e-05
988	CPPC	V	L	E	S	K	V	R	P	E	S	D	C	G	A	T	G	E	CPPC	1	1.05897e-05
989	CPPC	V	L	E	C	K	V	R	P	E	S	D	C	G	A	T	G	E	CPPC	1	1.05897e-05
990	CPPC	V	L	E	C	K	V	R	P	E	S	D	C	G	A	T	G	E	CPPC	1	1.05897e-05
991	CPPC	V	L	E	C	K	V	R	P	E	S	D	C	G	A	T	G	E	CPPC	1	1.05897e-05
992	CPPC	V	L	E	C	K	V	R	P	E	S	D	C	G	A	T	G	E	CPPC	1	1.05897e-05
993	CPPC	V	L	E	C	K	V	R	P	E	P	D	C	G	A	T	G	E	CPPC	1	1.05897e-05
994	CPPC	V	L	E	C	K	V	R	P	E	S	N	C	G	A	T	G	E	CPPC	1	1.05897e-05
995	CPPC	V	L	E	C	K	V	R	P	E	S	D	C	D	L	P	V	Y	CPPC	1	1.05897e-05
996	CPPC	V	L	E	C	K	V	R	P	E	S	D	C	A	E	T	G	E	CPPC	1	1.05897e-05
997	CPPC	V	L	E	C	K	V	R	P	E	S	D	C	G	A	T	G	E	CPPC	1	1.05897e-05
998	CPPC	V	L	E	C	K	V	R	P	E	S	D	C	G	A	T	G	D	CPPC	1	1.05897e-05
999	CPPC	V	L	E	C	K	V	R	P	E	S	D	C	G	A	T	G	E	CPPC	1	1.05897e-05
1000	CPPC	V	L	E	C	K	V	R	P	E	S	D	C	G	A	M	G	E	CPPC	1	1.05897e-05
1001	CPPC	V	L	E	C	K	V	R	P	E	S	D	C	G	A	S	G	E	CPPC	1	1.05897e-05
1002	CPPC	V	L	E	C	K	V	R	P	E	S	D	C	G	A	T	G	E	CPPC	1	1.05897e-05
1003	CPPC	V	L	E	C	K	V	R	P	V	S	D	C	G	A	T	G	E	CPPC	1	1.05897e-05
1004	CPPC	V	L	E	C	R	V	R	P	E	S	D	C	G	A	T	G	E	CPPC	1	1.05897e-05
1005	CPPC	V	L	E	C	E	V	R	P	E	S	D	C	G	A	T	G	E	CPPC	1	1.05897e-05
1006	CPPC	V	L	S	C	K	V	R	P	E	S	D	C	G	A	T	G	E	CPPC	1	1.05897e-05
1007	CPPC	V	E	S	H	C	P	L	L	M	I	Y	C	A	E	T	G	E	CPPC	1	1.05897e-05
1008	CPPC	V	A	T	S	C	V	P	H	L	L	A	C	S	G	P	L	L	CPPC	1	1.05897e-05
1009	CPPC	V	G	S	C	T	P	K	V	R	E	V	C	E	W	E	S	D	CPPC	1	1.05897e-05
1010	CPPC	V	*	S	H	C	P	L	L	M	I	Y	C	A	E	T	G	E	CPPC	1	1.05897e-05
1011	CPPC	V	Y	S	H	C	P	L	L	M	I	Y	C	A	E	T	G	E	CPPC	1	1.05897e-05
1012	CPPC	V	E	T	H	C	P	L	L	M	I	Y	C	A	E	T	G	E	CPPC	1	1.05897e-05
1013	CPPC	V	E	E	E	C	L	G	T	S	L	H	C	C	I	G	P	G	CPPC	1	1.05897e-05
1014	CPPC	V	E	Y	H	C	P	L	L	M	I	Y	C	A	E	T	G	E	CPPC	1	1.05897e-05
1015	CPPC	V	E	S	H	S	P	L	L	M	I	Y	C	A	E	A	G	E	CPPC	1	1.05897e-05
1016	CPPC	V	E	S	H	G	P	L	L	M	I	Y	C	A	E	T	G	E	CPPC	1	1.05897e-05
1017	CPPC	V	E	S	H	*	P	L	L	M	I	Y	C	A	E	T	G	E	CPPC	1	1.05897e-05
1018	CPPC	V	E	S	H	C	T	L	L	T	I	Y	C	A	E	T	G	E	CPPC	1	1.05897e-05
1019	CPPC	V	E	S	H	C	T	L	L	M	I	Y	C	A	E	T	G	E	CPPC	1	1.05897e-05
1020	CPPC	V	E	S	H	C	P	R	L	M	I	Y	C	A	E	T	G	E	CPPC	1	1.05897e-05
1021	CPPC	V	E	S	H	C	P	L	M	M	I	Y	C	A	E	T	G	E	CPPC	1	1.05897e-05
1022	CPPC	V	E	S	H	C	P	L	L	M	I	Y	C	A	E	T	G	E	CPPC	1	1.05897e-05
1023	CPPC	V	E	S	H	C	P	L	L	R	S	Y	C	A	E	T	G	E	CPPC	1	1.05897e-05
1024	CPPC	V	E	S	H	C	P	L	L	M	N	Y	C	A	E	T	G	E	CPPC	1	1.05897e-05
1025	CPPC	V	E	S	H	C	P	L	L	M	T	Y	C	A	E	T	G	E	CPPC	1	1.05897e-05
1026	CPPC	V	E	S	H	C	P	L	L	M	T	Y	C	A	E	T	G	E	CPPC	1	1.05897e-05
1027	CPPC	V	E	S	H	C	P	L	L	M	I	Y	R	A	E	T	G	E	CPPC	1	1.05897e-05
1028	CPPC	V	E	S	H	C	P	L	L	M	I	Y	C	T	D	L	G	A	CPPC	1	1.05897e-05
1029	CPPC	V	E	S	H	C	P	L	L	M	I	Y	C	A	E	T	G	E	CPPC	1	1.05897e-05
1030	CPPC	V	E	S	H	C	P	L	L	M	I	Y	C	A	E	T	S	E	CPPC	1	1.05897e-05
1031	CPPC	V	E	S	H	C	P	L	L	M	I	Y	C	A	E	T	D	D	CPPC	1	1.05897e-05
1032	CPPC	V	E	S	H	C	P	L	L	M	I	Y	C	A	E	T	G	E	CPPC	1	1.05897e-05
1033	CPPC	V	E	S	H	C	P	L	L	M	I	Y	C	A	E	T	G	Q	CPPC	1	1.05897e-05
1034	CPPC	V	E	S	H	C	P	L	L	M	I	Y	C	A	E	T	G	E	CPPC	1	1.05897e-05
1035	CPPC	V	E	S	H	C	P	L	L	M	I	Y	C	A	E	T	G	E	CPPC	1	1.05897e-05
1036	CPPC	V	E	S	H	C	P	L	L	M	I	Y	C	A	E	P	G	E	CPPC	1	1.05897e-05
1037	CPPC	V	E	S	H	C	P	L	L	M	I	Y	C	A	E	T	G	E	CPPC	1	1.05897e-05
1038	CPPC	V	E	S	H	C	P	L	L	M	I	Y	C	V	E	T	G	E	CPPC	1	1.05897e-05
1039	CPPC	V	E	S	H	C	P	L	L	M	I	Y	F	A	E	T	G	E	CPPC	1	1.05897e-05
1040	CPPC	V	E	S	H	C	P	L	L	M	L	Y	C	A	E	T	G	E	CPPC	1	1.05897e-05
1041	CPPC	V	E	S	H	C	P	L	L	L	I	Y	C	A	E	T	G	E	CPPC	1	1.05897e-05
1042	CPPC	V	E	S	H	C	P	L	L	M	I	Y	C	A	E	T	G	E	CPPC	1	1.05897e-05
1043	CPPC	V	E	S	H	C	R	L	L	M	I	Y	C	A	E	T	G	E	CPPC	1	1.05897e-05
1044	CPPC	V	E	S	H	C	L	L	L	M	I	Y	C	A	E	T	G	E	CPPC	1	1.05897e-05
1045	CPPC	V	E	S	H	C	P	L	L	M	I	Y	C	A	E	T	G	E	CPPC	1	1.05897e-05
1046	CPPC	V	E	S	L	C	P	L	L	M	I	Y	C	A	E	T	G	E	CPPC	1	1.05897e-05
1047	CPPC	V	S	G	C	T	P	E	T	G	E	F	C	W	R	E	D	D	CPPC	1	1.05897e-05
1048	CPPC	V	S	S	S	C	S	S	E	R	G	C	G	A	A	Q	V	M	CPPC	1	1.05897e-05
1049	CPPC	V	R	V	C	V	V	S	W	I	G	H	C	E	W	I	I	L	CPPC	1	1.05897e-05
1050	CPPC	V	L	K	A	W	L	V	D	*	S	L	L	L	V	Y	L	D	CPPC	1	1.05897e-05
1051	CPPC	V	L	G	E	C	W	Y	S	G	G	Y	C	I	L	L	I	H	CPPC	1	1.05897e-05
1052	CPPC	V	L	V	T	C	Q	G	S	L	L	C	F	V	H	W	H	E	CPPC	1	1.05897e-05
1053	CPPC	V	L	C	L	R	L	G	P	L	E	Y	C	T	L	H	E	T	CPPC	1	1.05897e-05
1054	CPPC	E	R	Q	P	C	H	R	E	Q	S	C	Y	S	A	A	A	H	CPPC	1	1.05897e-05
1055	CPPC	E	Q	D	C	W	I	G	R	R	A	D	C	R	L	G	L	S	CPPC	1	1.05897e-05
1056	CPPC	E	R	A	C	P	C	G	E	R	T	E	C	S	T	S	R	E	CPPC	1	1.05897e-05
1057	CPPC	E	R	C	R	L	G	L	V	C	H	V	F	G	R	R	R	V	CPPC	1	1.05897e-05
1058	CPPC	E	R	L	G	M	C	A	E	T	S	D	C	T	D	L	G	A	CPPC	1	1.05897e-05
1059	CPPC	E	L	C	G	L	L	R	S	C	P	R	R	E	K	A	C	R	CPPC	1	1.05897e-05
1060	CPPC	E	V	G	A	C	L	D	L	G	D	C	G	W	V	G	M	I	CPPC	1	1.05897e-05
1061	CPPC	E	V	C	F	L	I	R	W	C	P	W	G	R	A	E	L	F	CPPC	1	1.05897e-05
1062	CPPC	E	E	C	V	R	R	P	W	S	P	E	C	S	N	L	S	R	CPPC	1	1.05897e-05
1063	CPPC	E	S	C	P	S	R	R	V	S	L	V	C	P	C	E	N	E	CPPC	1	1.05897e-05
1064	CPPC	E	S	C	L	I	S	I	L	C	R	R	D	G	M	D	G	E	CPPC	1	1.05897e-05
1065	CPPC	E	L	C	V	T	V	C	F	C	R	S	R	C	T	P	E	S	CPPC	1	1.05897e-05
1066	CPPC	Y	I	C	R	C	M	G	W	C	E	F	L	C	I	H	V	I	CPPC	1	1.05897e-05
1067	CPPC	Y	P	T	E	C	S	T	A	E	T	C	M	E	T	G	E	R	CPPC	1	1.05897e-05
1068	CPPC	Y	P	L	R	C	G	S	E	E	D	C	G	R	N	D	S	G	CPPC	1	1.05897e-05
1069	CPPC	Y	P	L	C	R	D	P	R	R	C	V	E	Q	S	G	V	R	CPPC	1	1.05897e-05
1070	CPPC	Y	V	C	L	E	S	S	S	K	F	L	C	G	A	F	R	K	CPPC	1	1.05897e-05
1071	CPPC	Y	S	C	R	R	P	A	E	C	T	S	S	E	L	W	P	L	CPPC	1	1.05897e-05
1072	CPPC	Y	W	E	E	C	N	V	R	G	A	S	C	E	D	I	G	S	CPPC	1	1.05897e-05
1073	CPPC	Y	F	E	C	D	C	H	V	A	I	V	C	E	E	T	W	V	CPPC	1	1.05897e-05
1074	CPPC	S	P	E	C	W	S	V	S	S	R	F	C	P	L	P	V	H	CPPC	1	1.05897e-05
1075	CPPC	S	P	C	R	Q	R	L	L	D	V	E	C	I	E	V	G	A	CPPC	1	1.05897e-05
1076	CPPC	S	L	R	L	C	S	L	R	E	R	C	A	A	M	G	V	E	CPPC	1	1.05897e-05
1077	CPPC	S	L	R	Y	G	C	G	N	L	Y	L	C	C	E	W	G	V	CPPC	1	1.05897e-05
1078	CPPC	S	A	A	C	D	S	E	G	Y	C	V	E	T	G	E	K	S	CPPC	1	1.05897e-05
1079	CPPC	S	S	L	R	C	R	T	L	R	E	C	V	S	G	I	I	Y	CPPC	1	1.05897e-05
1080	CPPC	S	S	G	C	S	P	E	T	G	E	F	C	W	R	E	D	D	CPPC	1	1.05897e-05
1081	CPPC	S	P	F	E	C	F	R	S	I	W	S	C	Q	R	T	A	R	CPPC	1	1.05897e-05
1082	CPPC	S	R	R	G	C	E	A	L	T	A	R	A	E	T	G	E	T	CPPC	1	1.05897e-05
1083	CPPC	S	R	R	G	C	E	A	L	T	A	C	A	E	T	E	E	T	CPPC	1	1.05897e-05
1084	CPPC	S	R	R	G	C	E	A	L	T	A	C	A	E	T	G	E	T	CPPC	1	1.05897e-05
1085	CPPC	S	R	R	G	C	E	A	L	T	A	C	A	G	T	G	E	T	CPPC	1	1.05897e-05
1086	CPPC	S	R	R	G	C	E	A	L	T	A	C	V	E	T	G	E	T	CPPC	1	1.05897e-05
1087	CPPC	S	R	R	G	C	E	A	L	T	A	C	A	E	T	G	E	T	CPPC	1	1.05897e-05
1088	CPPC	S	R	C	M	C	S	V	W	E	E	S	C	P	N	E	S	E	CPPC	1	1.05897e-05
1089	CPPC	S	R	C	M	C	S	L	W	E	E	S	C	P	N	E	S	E	CPPC	1	1.05897e-05
1090	CPPC	S	E	R	H	C	S	V	M	G	C	L	C	N	A	H	W	E	CPPC	1	1.05897e-05
1091	CPPC	S	A	V	G	C	L	A	D	G	P	E	C	R	V	M	E	F	CPPC	1	1.05897e-05
1092	CPPC	S	V	V	V	C	V	G	G	E	E	E	C	G	T	V	D	W	CPPC	1	1.05897e-05
1093	CPPC	S	E	Q	C	W	S	T	Y	C	N	S	C	S	E	P	K	V	CPPC	1	1.05897e-05
1094	CPPC	S	E	C	L	I	W	L	F	C	Y	S	K	Y	P	P	P	P	CPPC	1	1.05897e-05
1095	CPPC	W	K	E	E	C	M	I	K	T	A	C	A	V	Y	D	P	E	CPPC	1	1.05897e-05
1096	CPPC	W	K	C	I	L	H	P	E	C	G	R	C	G	L	G	S	E	CPPC	1	1.05897e-05
1097	CPPC	W	I	L	C	L	T	T	L	R	P	E	C	S	P	W	F	M	CPPC	1	1.05897e-05
1098	CPPC	W	P	R	C	F	L	K	V	A	M	G	C	R	V	Y	I	P	CPPC	1	1.05897e-05
1099	CPPC	W	E	R	E	R	Q	T	D	C	D	T	G	E	L	M	S	F	CPPC	1	1.05897e-05
1100	CPPC	W	E	Y	E	R	Q	T	D	C	D	T	G	E	L	M	S	F	CPPC	1	1.05897e-05
1101	CPPC	W	E	C	K	R	Q	T	D	C	D	T	G	E	L	M	S	F	CPPC	1	1.05897e-05
1102	CPPC	W	E	C	E	R	Q	T	D	C	D	T	A	E	L	M	S	F	CPPC	1	1.05897e-05
1103	CPPC	W	E	C	E	R	Q	T	D	C	D	T	G	E	Q	M	S	F	CPPC	1	1.05897e-05
1104	CPPC	W	E	C	E	R	Q	T	D	C	D	T	G	E	L	T	S	F	CPPC	1	1.05897e-05
1105	CPPC	W	E	C	E	R	Q	T	D	C	D	T	G	E	L	M	S	F	CPPC	1	1.05897e-05
1106	CPPC	W	E	C	E	R	Q	T	D	C	D	T	G	E	L	M	S	V	CPPC	1	1.05897e-05
1107	CPPC	W	E	C	E	R	Q	T	D	C	D	T	G	E	L	M	S	Y	CPPC	1	1.05897e-05
1108	CPPC	W	E	C	E	R	Q	T	D	C	D	T	G	E	L	L	S	F	CPPC	1	1.05897e-05
1109	CPPC	W	E	C	E	R	Q	T	D	C	D	T	G	G	L	M	S	F	CPPC	1	1.05897e-05
1110	CPPC	W	E	C	E	R	Q	T	D	C	G	T	G	E	L	M	S	F	CPPC	1	1.05897e-05
1111	CPPC	W	E	C	E	R	R	T	D	C	D	T	G	E	L	M	S	F	CPPC	1	1.05897e-05
1112	CPPC	W	E	C	E	R	L	T	D	C	D	T	G	E	L	M	S	F	CPPC	1	1.05897e-05
1113	CPPC	W	D	C	E	R	Q	T	D	C	D	T	G	E	L	M	S	F	CPPC	1	1.05897e-05
1114	CPPC	W	G	C	E	R	Q	T	D	C	D	T	G	E	L	M	S	F	CPPC	1	1.05897e-05
1115	CPPC	W	V	P	C	S	Y	V	V	S	G	S	C	R	T	V	R	L	CPPC	1	1.05897e-05
1116	CPPC	C	M	S	C	L	R	G	S	V	T	E	C	M	E	S	P	G	CPPC	1	1.05897e-05
1117	CPPC	C	P	T	E	C	S	T	T	E	T	C	M	E	T	G	E	R	CPPC	1	1.05897e-05
1118	CPPC	C	P	T	E	C	S	T	A	*	T	C	M	E	T	G	E	R	CPPC	1	1.05897e-05
1119	CPPC	C	P	T	E	C	S	T	A	E	T	G	M	E	T	G	E	R	CPPC	1	1.05897e-05
1120	CPPC	C	P	T	E	C	S	T	A	E	T	Y	M	E	T	G	E	R	CPPC	1	1.05897e-05
1121	CPPC	C	P	T	E	C	S	T	A	E	T	C	I	E	T	G	E	R	CPPC	1	1.05897e-05
1122	CPPC	C	P	T	E	C	S	T	A	E	T	C	M	K	T	G	E	R	CPPC	1	1.05897e-05
1123	CPPC	C	P	T	E	C	S	T	A	E	T	C	M	E	T	S	E	R	CPPC	1	1.05897e-05
1124	CPPC	C	P	T	E	C	S	T	A	E	T	C	M	E	T	G	E	R	CPPC	1	1.05897e-05
1125	CPPC	C	P	T	E	C	S	T	A	E	T	C	M	E	T	G	E	R	CPPC	1	1.05897e-05
1126	CPPC	C	P	T	E	C	S	T	A	E	T	C	M	E	T	G	D	R	CPPC	1	1.05897e-05
1127	CPPC	C	P	T	E	C	S	T	A	E	T	C	M	E	T	C	E	R	CPPC	1	1.05897e-05
1128	CPPC	C	P	T	E	C	S	T	A	E	P	C	M	E	T	G	E	R	CPPC	1	1.05897e-05
1129	CPPC	C	P	T	E	C	S	T	A	E	S	C	M	E	T	G	E	R	CPPC	1	1.05897e-05
1130	CPPC	C	P	T	E	C	S	T	A	E	T	C	M	E	T	G	E	R	CPPC	1	1.05897e-05
1131	CPPC	C	P	T	E	C	S	M	A	E	T	C	M	E	T	G	E	R	CPPC	1	1.05897e-05
1132	CPPC	C	P	T	E	C	S	A	A	E	T	C	M	E	T	G	E	R	CPPC	1	1.05897e-05
1133	CPPC	C	R	T	E	C	S	T	A	E	T	C	M	E	T	G	E	R	CPPC	1	1.05897e-05
1134	CPPC	C	L	K	C	E	V	P	M	S	S	Y	E	I	E	T	G	E	CPPC	1	1.05897e-05
1135	CPPC	C	L	K	C	E	V	P	M	S	C	Y	E	I	E	T	G	G	CPPC	1	1.05897e-05
1136	CPPC	C	L	V	C	K	S	W	F	L	C	R	C	E	Y	N	M	D	CPPC	1	1.05897e-05
1137	CPPC	C	L	S	C	A	A	S	L	T	C	W	R	R	L	S	E	H	CPPC	1	1.05897e-05
1138	CPPC	C	L	C	L	S	I	W	G	E	F	S	C	I	V	R	I	R	CPPC	1	1.05897e-05
1139	CPPC	C	W	Q	C	T	E	D	D	S	L	D	C	E	E	L	G	V	CPPC	1	1.05897e-05
1140	CPPC	C	W	A	R	C	E	R	H	L	G	R	C	R	L	P	V	H	CPPC	1	1.05897e-05
1141	CPPC	L	Q	S	C	I	T	Q	S	M	C	W	D	E	W	T	W	L	CPPC	1	1.05897e-05
1142	CPPC	L	P	L	C	T	D	Y	S	K	S	L	C	S	L	S	P	E	CPPC	1	1.05897e-05
1143	CPPC	L	P	L	C	C	D	A	A	S	G	E	C	L	E	G	G	N	CPPC	1	1.05897e-05
1144	CPPC	L	L	Y	L	C	P	E	F	T	G	L	C	T	R	R	S	R	CPPC	1	1.05897e-05
1145	CPPC	L	D	Y	F	V	C	L	S	E	Y	F	C	F	L	I	T	F	CPPC	1	1.05897e-05
1146	CPPC	L	G	W	E	C	S	S	Q	A	C	R	C	E	E	V	R	S	CPPC	1	1.05897e-05
1147	CPPC	L	Y	V	C	R	G	V	G	E	C	C	L	L	A	G	I	R	CPPC	1	1.05897e-05
1148	CPPC	L	C	A	P	C	T	G	S	G	A	E	C	V	F	F	L	W	CPPC	1	1.05897e-05
1149	CPPC	L	L	E	N	C	F	V	A	F	A	V	C	K	E	E	E	R	CPPC	1	1.05897e-05
1150	CPPC	F	T	L	S	C	P	P	D	G	T	V	C	R	I	S	E	S	CPPC	1	1.05897e-05
1151	CPPC	F	T	C	Y	E	C	E	A	P	S	Q	C	A	H	T	L	M	CPPC	1	1.05897e-05
1152	CPPC	F	P	R	F	C	R	G	L	P	T	C	R	S	F	R	W	L	CPPC	1	1.05897e-05
1153	CPPC	F	D	M	A	R	V	I	W	G	E	C	S	T	P	E	K	E	CPPC	1	1.05897e-05
1154	CPPC	F	D	M	A	C	V	M	W	G	E	C	S	T	P	E	K	E	CPPC	1	1.05897e-05
1155	CPPC	F	D	M	A	C	V	I	W	G	E	R	S	T	P	E	K	E	CPPC	1	1.05897e-05
1156	CPPC	F	D	M	A	C	V	I	W	G	E	C	N	T	P	E	K	E	CPPC	1	1.05897e-05
1157	CPPC	F	D	M	A	C	V	I	W	G	E	C	S	T	P	E	K	G	CPPC	1	1.05897e-05
1158	CPPC	F	A	L	E	C	L	F	H	L	A	G	C	V	A	G	I	A	CPPC	1	1.05897e-05
1159	CPPC	F	V	C	D	F	G	R	G	L	S	F	C	G	G	G	E	E	CPPC	1	1.05897e-05
1160	CPPC	F	E	C	L	P	D	V	E	M	G	I	C	V	P	V	L	S	CPPC	1	1.05897e-05
1161	CPPC	F	E	C	L	P	D	V	E	M	G	I	C	V	P	V	L	S	CPPC	1	1.05897e-05
1162	CPPC	F	E	C	L	P	D	V	E	M	G	I	R	V	P	V	L	S	CPPC	1	1.05897e-05
1163	CPPC	F	E	C	L	P	D	V	E	M	G	I	C	V	P	M	L	S	CPPC	1	1.05897e-05
1164	CPPC	F	Y	M	A	C	V	I	W	G	E	C	S	T	P	E	K	E	CPPC	1	1.05897e-05
1165	CPPC	F	W	C	T	C	E	S	E	R	F	D	C	E	P	S	W	G	CPPC	1	1.05897e-05
1166	CPPC	F	C	F	C	L	T	Q	L	E	S	R	C	G	R	D	D	T	CPPC	1	1.05897e-05
1167	CPPC	R	E	T	E	C	V	P	V	F	W	E	C	W	E	T	G	E	CPPC	1	1.05897e-05
1168	CPPC	R	E	S	C	K	D	P	D	L	G	D	C	F	T	E	A	N	CPPC	1	1.05897e-05
1169	CPPC	R	E	A	G	C	T	A	H	T	T	C	D	L	E	L	G	E	CPPC	1	1.05897e-05
1170	CPPC	A	S	G	C	S	P	E	T	G	E	F	C	W	R	E	D	N	CPPC	1	1.05897e-05
1171	CPPC	V	L	E	C	K	V	R	P	E	S	D	C	G	A	T	G	E	CPPC	1	1.05897e-05
1172	CPPC	R	T	R	C	D	R	E	T	G	E	R	C	H	L	A	Q	T	CPPC	1	1.05897e-05
1173	CPPC	T	A	S	C	R	D	V	E	T	G	E	C	E	R	R	Y	Q	CPPC	1	1.05897e-05
1174	CPPC	R	A	C	A	T	D	I	E	T	G	E	C	A	G	Q	E	R	CPPC	1	1.05897e-05
1175	CPPC	A	S	G	C	S	P	E	T	G	E	F	C	W	R	K	D	D	CPPC	1	1.05897e-05
1176	CPPC	V	L	E	C	K	V	R	P	E	S	D	C	G	A	T	G	E	CPPC	1	1.05897e-05
1177	CPPC	V	E	S	H	C	P	L	L	T	I	Y	C	A	E	T	G	E	CPPC	1	1.05897e-05
1178	CPPC	V	E	S	H	C	P	L	L	M	I	Y	C	A	E	T	G	E	CPPC	1	1.05897e-05
1179	CPPC	C	P	T	E	C	S	T	A	E	T	C	M	E	T	G	E	R	CPPC	1	1.05897e-05
1180	CPPC	P	S	S	C	T	F	N	S	E	C	S	S	K	R	Q	W	S	CPPC	1	1.05897e-05
1181	CPPC	V	E	S	H	C	P	L	L	M	I	Y	C	A	E	T	G	E	CPPC	1	1.05897e-05
