# Supplementary material for: Structure-guided design of CPPC-paired disulfide-rich peptide libraries for ligand and drug discovery
Source: Chem Sci. 2022 May 20;13(26):7780–9. doi: 10.1039/d2sc00924b (PMC9258321; doi:10.1039/d2sc00924b)
Supplement: SC-013-D2SC00924B-s005 [file SC-013-D2SC00924B-s005.xlsx]

## Sheet: Sheet1
Number	Sequence																								Abundance	Percentages
1	CPPC	P	R	E	H	E	L	V	A	V	P	C	D	S	F	T	N	C	W	E	L	L	T	CPPC	91153	0.865642
2	CPPC	R	A	W	R	Y						C	D	S	F	T	N	C	W	E	L	L	T	CPPC	1353	0.0128489
3	CPPC	G	T	A	T	E	W	I	V	Q	P	C	D	S	F	T	N	C	W	E	L	L	T	CPPC	1112	0.0105602
4	CPPC	H	R	W	E	Y						C	D	S	F	T	N	C	W	E	L	L	T	CPPC	804	0.00763526
5	CPPC	G	S	V	G	E	F	Y	V	K	E	C	D	S	F	T	N	C	W	E	L	L	T	CPPC	795	0.00754979
6	CPPC	R	F	M	V	E	P					C	D	S	F	T	N	C	W	E	L	L	T	CPPC	793	0.00753079
7	CPPC	P	R	A	G	F	L	F	V	K	E	C	D	S	F	T	N	C	W	E	L	L	T	CPPC	629	0.00597335
8	CPPC	H	V	L	V	R	E					C	D	S	F	T	N	C	W	E	L	L	T	CPPC	555	0.00527061
9	CPPC	R	F	F	L	R	P					C	D	S	F	T	N	C	W	E	L	L	T	CPPC	527	0.0050047
10	CPPC	P	R	G	R	V	W	V	V	W	A	C	D	S	F	T	N	C	W	E	L	L	T	CPPC	417	0.00396008
11	CPPC	E	Y	S	H	W						C	D	S	F	T	N	C	W	E	L	L	T	CPPC	411	0.0039031
12	CPPC	S	R	E	G	A	W	W	V	I	P	C	D	S	F	T	N	C	W	E	L	L	T	CPPC	244	0.00231717
13	CPPC	E	F	Y	L	R	K					C	D	S	F	T	N	C	W	E	L	L	T	CPPC	241	0.00228868
14	CPPC	S	F	F	V	R	E					C	D	S	F	T	N	C	W	E	L	L	T	CPPC	209	0.00198479
15	CPPC	R	F	Y	R	Y						C	D	S	F	T	N	C	W	E	L	L	T	CPPC	205	0.0019468
16	CPPC	R	G	W	E	W						C	D	S	F	T	N	C	W	E	L	L	T	CPPC	170	0.00161442
17	CPPC	L	R	W	R	S						C	D	S	F	T	N	C	W	E	L	L	T	CPPC	137	0.00130103
18	CPPC	E	W	M	V	R	P					C	D	S	F	T	N	C	W	E	L	L	T	CPPC	127	0.00120607
19	CPPC	G	A	L	R	E	W	V	V	L	P	C	D	S	F	T	N	C	W	E	L	L	T	CPPC	120	0.00113959
20	CPPC	N	P	E	P	L	L	F	A	R	P	C	D	S	F	T	N	C	W	E	L	L	T	CPPC	110	0.00104462
21	CPPC	E	S	W	S	Y						C	D	S	F	T	N	C	W	E	L	L	T	CPPC	107	0.00101613
22	CPPC	T	E	Y	R	W						C	D	S	F	T	N	C	W	E	L	L	T	CPPC	103	0.000978148
23	CPPC	T	I	E	A	T	P					C	D	S	F	T	N	C	W	E	L	L	T	CPPC	100	0.000949659
24	CPPC	H	E	L	S	W						C	D	S	F	T	N	C	W	E	L	L	T	CPPC	93	0.000883182
25	CPPC	S	E	L	W	L	W	H	W	R		C	D	S	F	T	N	C	W	E	L	L	T	CPPC	83	0.000788217
26	CPPC	R	F	Q	V	R	E					C	D	S	F	T	N	C	W	E	L	L	T	CPPC	80	0.000759727
27	CPPC	R	R	V	G	L	L					C	D	S	F	T	N	C	W	E	L	L	T	CPPC	75	0.000712244
28	CPPC	S	F	H	V	K	E					C	D	S	F	T	N	C	W	E	L	L	T	CPPC	71	0.000674258
29	CPPC	S	F	Y	V	L	E					C	D	S	F	T	N	C	W	E	L	L	T	CPPC	63	0.000598285
30	CPPC	M	A	V	S	E	W	Y	V	R	P	C	D	S	F	T	N	C	W	E	L	L	T	CPPC	62	0.000588788
31	CPPC	S	W	P	E	H	H	F	R	Y		C	D	S	F	T	N	C	W	E	L	L	T	CPPC	58	0.000550802
32	CPPC	T	R	W	G	E						C	D	S	F	T	N	C	W	E	L	L	T	CPPC	56	0.000531809
33	CPPC	T	R	Q	G	K	I	F	A	R	P	C	D	S	F	T	N	C	W	E	L	L	T	CPPC	55	0.000522312
34	CPPC	E	Y	S	W	W						C	D	S	F	T	N	C	W	E	L	L	T	CPPC	55	0.000522312
35	CPPC	T	S	R	P	S	I	E	V	R	P	C	D	S	F	T	N	C	W	E	L	L	T	CPPC	54	0.000512816
36	CPPC	E	L	Y	Y	R	R					C	D	S	F	T	N	C	W	E	L	L	T	CPPC	52	0.000493822
37	CPPC	E	W	L	R	T						C	D	S	F	T	N	C	W	E	L	L	T	CPPC	51	0.000484326
38	CPPC	R	F	L	I	R	E					C	D	S	F	T	N	C	W	E	L	L	T	CPPC	48	0.000455836
39	CPPC	E	W	Y	R	T						C	D	S	F	T	N	C	W	E	L	L	T	CPPC	48	0.000455836
40	CPPC	S	W	L	V	R	E					C	D	S	F	T	N	C	W	E	L	L	T	CPPC	49	0.000465333
41	CPPC	F	R	W	R	M						C	D	S	F	T	N	C	W	E	L	L	T	CPPC	47	0.00044634
42	CPPC	R	W	F	V	R	E					C	D	S	F	T	N	C	W	E	L	L	T	CPPC	46	0.000436843
43	CPPC	A	L	V	E	W						C	D	S	F	T	N	C	W	E	L	L	T	CPPC	46	0.000436843
44	CPPC	G	K	E	G	S	V	H	V	I	P	C	D	S	F	T	N	C	W	E	L	L	T	CPPC	45	0.000427346
45	CPPC	S	L	I	V	R	R					C	D	S	F	T	N	C	W	E	L	L	T	CPPC	44	0.00041785
46	CPPC	L	R	E	H	E	L	V	A	V	P	C	D	S	F	T	N	C	W	E	L	L	T	CPPC	49	0.000465333
47	CPPC	W	R	I	L	E						C	D	S	F	T	N	C	W	E	L	L	T	CPPC	42	0.000398857
48	CPPC	G	S	L	V	E	W	H	V	R	P	C	D	S	F	T	N	C	W	E	L	L	T	CPPC	40	0.000379863
49	CPPC	S	R	K	V	S	L	W	R	H		C	D	S	F	T	N	C	W	E	L	L	T	CPPC	40	0.000379863
50	CPPC	R	G	L	E	W						C	D	S	F	T	N	C	W	E	L	L	T	CPPC	38	0.00036087
51	CPPC	R	E	E	H	T	L	Y	I	R	E	C	D	S	F	T	N	C	W	E	L	L	T	CPPC	38	0.00036087
52	CPPC	E	R	S	G	L						C	D	S	F	T	N	C	W	E	L	L	T	CPPC	38	0.00036087
53	CPPC	W	R	W	E	S						C	D	S	F	T	N	C	W	E	L	L	T	CPPC	38	0.00036087
54	CPPC	L	E	W	R	G						C	D	S	F	T	N	C	W	E	L	L	T	CPPC	37	0.000351374
55	CPPC	E	E	N	P	T	W	E	V	R	Q	C	D	S	F	T	N	C	W	E	L	L	T	CPPC	37	0.000351374
56	CPPC	A	P	G	S	E	L	V	V	R	A	C	D	S	F	T	N	C	W	E	L	L	T	CPPC	37	0.000351374
57	CPPC	W	F	W	R	E						C	D	S	F	T	N	C	W	E	L	L	T	CPPC	36	0.000341877
58	CPPC	R	R	L	A	V	F					C	D	S	F	T	N	C	W	E	L	L	T	CPPC	35	0.000332381
59	CPPC	S	L	I	V	R	E					C	D	S	F	T	N	C	W	E	L	L	T	CPPC	36	0.000341877
60	CPPC	P	R	E	H	E	L	V	A	V	L	C	D	S	F	T	N	C	W	E	L	L	T	CPPC	34	0.000322884
61	CPPC	G	V	M	E	S	L	W	V	R	V	C	D	S	F	T	N	C	W	E	L	L	T	CPPC	34	0.000322884
62	CPPC	S	R	W	E	F						C	D	S	F	T	N	C	W	E	L	L	T	CPPC	34	0.000322884
63	CPPC	S	E	L	M	W						C	D	S	F	T	N	C	W	E	L	L	T	CPPC	34	0.000322884
64	CPPC	R	R	W	V	W						C	D	S	F	T	N	C	W	E	L	L	T	CPPC	33	0.000313387
65	CPPC	E	A	W	S	K						C	D	S	F	T	N	C	W	E	L	L	T	CPPC	33	0.000313387
66	CPPC	T	P	R	S	E	L	V	I	R	S	C	D	S	F	T	N	C	W	E	L	L	T	CPPC	32	0.000303891
67	CPPC	G	P	F	Q	E	W	H	V	V	P	C	D	S	F	T	N	C	W	E	L	L	T	CPPC	32	0.000303891
68	CPPC	S	L	F	V	R	E					C	D	S	F	T	N	C	W	E	L	L	T	CPPC	31	0.000294394
69	CPPC	T	I	E	V	R	E					C	D	S	F	T	N	C	W	E	L	L	T	CPPC	30	0.000284898
70	CPPC	L	E	W	R	V						C	D	S	F	T	N	C	W	E	L	L	T	CPPC	29	0.000275401
71	CPPC	D	N	R	L	L	W	L	V	R	E	C	D	S	F	T	N	C	W	E	L	L	T	CPPC	28	0.000265904
72	CPPC	E	R	W	G	A						C	D	S	F	T	N	C	W	E	L	L	T	CPPC	27	0.000256408
73	CPPC	L	W	R	E	W						C	D	S	F	T	N	C	W	E	L	L	T	CPPC	26	0.000246911
74	CPPC	E	R	L	W	G						C	D	S	F	T	N	C	W	E	L	L	T	CPPC	26	0.000246911
75	CPPC	S	E	Y	A	W						C	D	S	F	T	N	C	W	E	L	L	T	CPPC	24	0.000227918
76	CPPC	E	W	W	W	G						C	D	S	F	T	N	C	W	E	L	L	T	CPPC	23	0.000218421
77	CPPC	W	E	W	R	W						C	D	S	F	T	N	C	W	E	L	L	T	CPPC	23	0.000218421
78	CPPC	T	F	Q	E	W						C	D	S	F	T	N	C	W	E	L	L	T	CPPC	22	0.000208925
79	CPPC	P	R	P	S	V	F	G	V	R	E	C	D	S	F	T	N	C	W	E	L	L	T	CPPC	22	0.000208925
80	CPPC	L	P	D	R	E	L	I	K	R	P	C	D	S	F	T	N	C	W	E	L	L	T	CPPC	21	0.000199428
81	CPPC	E	S	G	E	V	W	Y	L	V	E	C	D	S	F	T	N	C	W	E	L	L	T	CPPC	21	0.000199428
82	CPPC	W	R	E	L	L						C	D	S	F	T	N	C	W	E	L	L	T	CPPC	21	0.000199428
83	CPPC	W	E	V	R	E						C	D	S	F	T	N	C	W	E	L	L	T	CPPC	21	0.000199428
84	CPPC	H	A	R	G	E	L	V	V	R	P	C	D	S	F	T	N	C	W	E	L	L	T	CPPC	20	0.000189932
85	CPPC	P	R	K	S	L	W	Q	V	T	P	C	D	S	F	T	N	C	W	E	L	L	T	CPPC	20	0.000189932
86	CPPC	E	W	I	V	R	K					C	D	S	F	T	N	C	W	E	L	L	T	CPPC	20	0.000189932
87	CPPC	E	F	R	H	Y	W	W	V	V	A	C	D	S	F	T	N	C	W	E	L	L	T	CPPC	20	0.000189932
88	CPPC	R	G	E	R	W						C	D	S	F	T	N	C	W	E	L	L	T	CPPC	19	0.000180435
89	CPPC	E	W	W	W	Y						C	D	S	F	T	N	C	W	E	L	L	T	CPPC	19	0.000180435
90	CPPC	T	L	W	W	E	S					C	D	S	F	T	N	C	W	E	L	L	T	CPPC	18	0.000170939
91	CPPC	M	Y	E	V	R						C	D	S	F	T	N	C	W	E	L	L	T	CPPC	18	0.000170939
92	CPPC	V	Y	G	E	F						C	D	S	F	T	N	C	W	E	L	L	T	CPPC	18	0.000170939
93	CPPC	N	E	Y	T	Q	I	W	A	R	S	C	D	S	F	T	N	C	W	E	L	L	T	CPPC	17	0.000161442
94	CPPC	R	H	R	M	L	W					C	D	S	F	T	N	C	W	E	L	L	T	CPPC	17	0.000161442
95	CPPC	R	E	W	K	W						C	D	S	F	T	N	C	W	E	L	L	T	CPPC	17	0.000161442
96	CPPC	E	L	V	E	W						C	D	S	F	T	N	C	W	E	L	L	T	CPPC	17	0.000161442
97	CPPC	E	Y	E	V	L	W	L	V	M	P	C	D	S	F	T	N	C	W	E	L	L	T	CPPC	17	0.000161442
98	CPPC	R	I	W	E	S						C	D	S	F	T	N	C	W	E	L	L	T	CPPC	15	0.000142449
99	CPPC	D	R	E	R	V	L	L	V	R	P	C	D	S	F	T	N	C	W	E	L	L	T	CPPC	15	0.000142449
100	CPPC	A	I	F	A	R	E					C	D	S	F	T	N	C	W	E	L	L	T	CPPC	15	0.000142449
101	CPPC	S	S	E	F	Q	W	L	V	R	E	C	D	S	F	T	N	C	W	E	L	L	T	CPPC	15	0.000142449
102	CPPC	T	I	Y	I	K	E					C	D	S	F	T	N	C	W	E	L	L	T	CPPC	14	0.000132952
103	CPPC	M	W	E	R	W						C	D	S	F	T	N	C	W	E	L	L	T	CPPC	14	0.000132952
104	CPPC	P	R	E	H	Y	L	V	A	V	P	C	D	S	F	T	N	C	W	E	L	L	T	CPPC	14	0.000132952
105	CPPC	P	R	E	H	W	L	V	A	V	P	C	D	S	F	T	N	C	W	E	L	L	T	CPPC	14	0.000132952
106	CPPC	L	L	E	W	G						C	D	S	F	T	N	C	W	E	L	L	T	CPPC	14	0.000132952
107	CPPC	A	L	Y	A	V	E					C	D	S	F	T	N	C	W	E	L	L	T	CPPC	14	0.000132952
108	CPPC	G	I	L	V	E	E					C	D	S	F	T	N	C	W	E	L	L	T	CPPC	14	0.000132952
109	CPPC	V	V	V	E	W						C	D	S	F	T	N	C	W	E	L	L	T	CPPC	14	0.000132952
110	CPPC	V	S	E	Y	W						C	D	S	F	T	N	C	W	E	L	L	T	CPPC	14	0.000132952
111	CPPC	K	F	Q	F	R	E					C	D	S	F	T	N	C	W	E	L	L	T	CPPC	13	0.000123456
112	CPPC	T	M	Y	V	R	E					C	D	S	F	T	N	C	W	E	L	L	T	CPPC	13	0.000123456
113	CPPC	R	D	V	E	L	W	S	L	R	P	C	D	S	F	T	N	C	W	E	L	L	T	CPPC	13	0.000123456
114	CPPC	P	R	K	P	V	T	L	V	Y	P	C	D	S	F	T	N	C	W	E	L	L	T	CPPC	13	0.000123456
115	CPPC	R	L	W	R	W						C	D	S	F	T	N	C	W	E	L	L	T	CPPC	13	0.000123456
116	CPPC	R	F	L	V	R	E					C	D	S	F	T	N	C	W	E	L	L	T	CPPC	13	0.000123456
117	CPPC	L	S	L	E	F						C	D	S	F	T	N	C	W	E	L	L	T	CPPC	14	0.000132952
118	CPPC	L	E	W	R	A						C	D	S	F	T	N	C	W	E	L	L	T	CPPC	13	0.000123456
119	CPPC	V	G	F	L	V	A	E				C	D	S	F	T	N	C	W	E	L	L	T	CPPC	13	0.000123456
120	CPPC	W	T	L	V	T	E					C	D	S	F	T	N	C	W	E	L	L	T	CPPC	13	0.000123456
121	CPPC	W	E	W	S	H						C	D	S	F	T	N	C	W	E	L	L	T	CPPC	13	0.000123456
122	CPPC	K	E	W	R	F						C	D	S	F	T	N	C	W	E	L	L	T	CPPC	12	0.000113959
123	CPPC	K	S	I	E	S	F	I	A	K	P	C	D	S	F	T	N	C	W	E	L	L	T	CPPC	12	0.000113959
124	CPPC	R	A	L	I	R	E					C	D	S	F	T	N	C	W	E	L	L	T	CPPC	12	0.000113959
125	CPPC	I	E	W	A	Q						C	D	S	F	T	N	C	W	E	L	L	T	CPPC	13	0.000123456
126	CPPC	P	R	E	H	E	L	F	A	V	P	C	D	S	F	T	N	C	W	E	L	L	T	CPPC	11	0.000104462
127	CPPC	P	R	E	R	E	L	V	A	V	P	C	D	S	F	T	N	C	W	E	L	L	T	CPPC	11	0.000104462
128	CPPC	E	R	L	V	W						C	D	S	F	T	N	C	W	E	L	L	T	CPPC	11	0.000104462
129	CPPC	E	R	L	W	W						C	D	S	F	T	N	C	W	E	L	L	T	CPPC	11	0.000104462
130	CPPC	I	E	Y	S	Y						C	D	S	F	T	N	C	W	E	L	L	T	CPPC	10	9.49659e-05
131	CPPC	H	D	K	Y	E	L	F	Y	R	K	C	D	S	F	T	N	C	W	E	L	L	T	CPPC	10	9.49659e-05
132	CPPC	P	R	E	H	E	L	V	A	A	P	C	D	S	F	T	N	C	W	E	L	L	T	CPPC	10	9.49659e-05
133	CPPC	P	R	E	H	E	L	V	A	F	P	C	D	S	F	T	N	C	W	E	L	L	T	CPPC	10	9.49659e-05
134	CPPC	R	L	L	R	W						C	D	S	F	T	N	C	W	E	L	L	T	CPPC	10	9.49659e-05
135	CPPC	E	V	I	V	R	P	S	G	R		C	D	S	F	T	N	C	W	E	L	L	T	CPPC	10	9.49659e-05
136	CPPC	E	E	L	V	Y	G	W				C	D	S	F	T	N	C	W	E	L	L	T	CPPC	10	9.49659e-05
137	CPPC	F	R	M	R	W						C	D	S	F	T	N	C	W	E	L	L	T	CPPC	10	9.49659e-05
138	CPPC	Q	E	L	S	W						C	D	S	F	T	N	C	W	E	L	L	T	CPPC	9	8.54693e-05
139	CPPC	P	R	K	H	E	L	V	A	V	P	C	D	S	F	T	N	C	W	E	L	L	T	CPPC	9	8.54693e-05
140	CPPC	P	R	E	N	E	L	V	A	V	P	C	D	S	F	T	N	C	W	E	L	L	T	CPPC	9	8.54693e-05
141	CPPC	P	R	S	H	E	L	V	A	V	P	C	D	S	F	T	N	C	W	E	L	L	T	CPPC	9	8.54693e-05
142	CPPC	P	R	W	H	E	L	V	A	V	P	C	D	S	F	T	N	C	W	E	L	L	T	CPPC	9	8.54693e-05
143	CPPC	R	E	W	V	W						C	D	S	F	T	N	C	W	E	L	L	T	CPPC	14	0.000132952
144	CPPC	E	H	W	A	F						C	D	S	F	T	N	C	W	E	L	L	T	CPPC	9	8.54693e-05
145	CPPC	S	R	E	H	E	L	V	A	V	P	C	D	S	F	T	N	C	W	E	L	L	T	CPPC	9	8.54693e-05
146	CPPC	S	F	L	I	R	E					C	D	S	F	T	N	C	W	E	L	L	T	CPPC	9	8.54693e-05
147	CPPC	W	L	F	E	W						C	D	S	F	T	N	C	W	E	L	L	T	CPPC	9	8.54693e-05
148	CPPC	F	L	E	V	R						C	D	S	F	T	N	C	W	E	L	L	T	CPPC	9	8.54693e-05
149	CPPC	R	F	L	V	Y	E					C	D	S	F	T	N	C	W	E	L	L	T	CPPC	8	7.59727e-05
150	CPPC	S	E	S	R	S	W	Y	V	R	A	C	D	S	F	T	N	C	W	E	L	L	T	CPPC	8	7.59727e-05
151	CPPC	Q	E	Y	L	W						C	D	S	F	T	N	C	W	E	L	L	T	CPPC	8	7.59727e-05
152	CPPC	P	R	E	H	E	P	V	A	V	P	C	D	S	F	T	N	C	W	E	L	L	T	CPPC	8	7.59727e-05
153	CPPC	P	R	E	H	E	L	V	V	V	P	C	D	S	F	T	N	C	W	E	L	L	T	CPPC	8	7.59727e-05
154	CPPC	P	R	E	H	E	L	V	S	V	P	C	D	S	F	T	N	C	W	E	L	L	T	CPPC	8	7.59727e-05
155	CPPC	P	R	E	H	E	F	V	A	V	P	C	D	S	F	T	N	C	W	E	L	L	T	CPPC	8	7.59727e-05
156	CPPC	P	R	Y	H	E	L	V	A	V	P	C	D	S	F	T	N	C	W	E	L	L	T	CPPC	9	8.54693e-05
157	CPPC	P	S	E	H	E	L	V	A	V	P	C	D	S	F	T	N	C	W	E	L	L	T	CPPC	9	8.54693e-05
158	CPPC	P	R	G	P	A	L	R	V	R	A	C	D	S	F	T	N	C	W	E	L	L	T	CPPC	8	7.59727e-05
159	CPPC	E	P	L	E	N	F	S	F	S	W	C	D	S	F	T	N	C	W	E	L	L	T	CPPC	8	7.59727e-05
160	CPPC	F	E	W	R	A						C	D	S	F	T	N	C	W	E	L	L	T	CPPC	8	7.59727e-05
161	CPPC	T	V	G	L	E	W	L	A	V	P	C	D	S	F	T	N	C	W	E	L	L	T	CPPC	7	6.64761e-05
162	CPPC	Q	I	W	E	W						C	D	S	F	T	N	C	W	E	L	L	T	CPPC	7	6.64761e-05
163	CPPC	P	R	E	H	E	L	V	D	V	P	C	D	S	F	T	N	C	W	E	L	L	T	CPPC	7	6.64761e-05
164	CPPC	P	R	E	H	E	L	V	A	V	S	C	D	S	F	T	N	C	W	E	L	L	T	CPPC	7	6.64761e-05
165	CPPC	P	A	E	Q	L	W	F	A	R	E	C	D	S	F	T	N	C	W	E	L	L	T	CPPC	7	6.64761e-05
166	CPPC	R	K	W	E	V	G					C	D	S	F	T	N	C	W	E	L	L	T	CPPC	7	6.64761e-05
167	CPPC	L	K	T	E	W						C	D	S	F	T	N	C	W	E	L	L	T	CPPC	7	6.64761e-05
168	CPPC	L	R	R	V	W						C	D	S	F	T	N	C	W	E	L	L	T	CPPC	9	8.54693e-05
169	CPPC	A	S	E	S	T	W	L	V	V	P	C	D	S	F	T	N	C	W	E	L	L	T	CPPC	7	6.64761e-05
170	CPPC	A	I	E	V	R	E					C	D	S	F	T	N	C	W	E	L	L	T	CPPC	7	6.64761e-05
171	CPPC	A	E	Y	L	W						C	D	S	F	T	N	C	W	E	L	L	T	CPPC	7	6.64761e-05
172	CPPC	A	L	A	N	M	V	K	R	E	W	C	D	S	F	T	N	C	W	E	L	L	T	CPPC	7	6.64761e-05
173	CPPC	G	S	V	E	Q	W	V	T	R	P	C	D	S	F	T	N	C	W	E	L	L	T	CPPC	7	6.64761e-05
174	CPPC	E	R	W	I	W						C	D	S	F	T	N	C	W	E	L	L	T	CPPC	7	6.64761e-05
175	CPPC	E	R	W	V	Y						C	D	S	F	T	N	C	W	E	L	L	T	CPPC	7	6.64761e-05
176	CPPC	E	G	T	H	E	W	H	V	T	P	C	D	S	F	T	N	C	W	E	L	L	T	CPPC	7	6.64761e-05
177	CPPC	Y	L	W	A	E						C	D	S	F	T	N	C	W	E	L	L	T	CPPC	7	6.64761e-05
178	CPPC	S	E	Q	W	R	R	W	L	V		C	D	S	F	T	N	C	W	E	L	L	T	CPPC	7	6.64761e-05
179	CPPC	L	K	W	R	E						C	D	S	F	T	N	C	W	E	L	L	T	CPPC	7	6.64761e-05
180	CPPC	F	R	W	E	H						C	D	S	F	T	N	C	W	E	L	L	T	CPPC	7	6.64761e-05
181	CPPC	M	H	F	W	E						C	D	S	F	T	N	C	W	E	L	L	T	CPPC	6	5.69795e-05
182	CPPC	I	V	P	L	P	R	L	F	R		C	D	S	F	T	N	C	W	E	L	L	T	CPPC	6	5.69795e-05
183	CPPC	Q	H	W	W	E						C	D	S	F	T	N	C	W	E	L	L	T	CPPC	6	5.69795e-05
184	CPPC	H	E	W	R	V						C	D	S	F	T	N	C	W	E	L	L	T	CPPC	6	5.69795e-05
185	CPPC	P	R	Q	H	E	L	V	A	V	P	C	D	S	F	T	N	C	W	E	L	L	T	CPPC	6	5.69795e-05
186	CPPC	P	R	E	H	K	L	V	A	V	P	C	D	S	F	T	N	C	W	E	L	L	T	CPPC	6	5.69795e-05
187	CPPC	P	R	E	H	E	L	V	A	I	P	C	D	S	F	T	N	C	W	E	L	L	T	CPPC	6	5.69795e-05
188	CPPC	P	G	E	H	E	L	V	A	V	P	C	D	S	F	T	N	C	W	E	L	L	T	CPPC	6	5.69795e-05
189	CPPC	P	E	L	G	W	I	I	S	P		C	D	S	F	T	N	C	W	E	L	L	T	CPPC	6	5.69795e-05
190	CPPC	L	P	E	P	E	W	W	V	R	S	C	D	S	F	T	N	C	W	E	L	L	T	CPPC	6	5.69795e-05
191	CPPC	L	H	Y	V	E						C	D	S	F	T	N	C	W	E	L	L	T	CPPC	6	5.69795e-05
192	CPPC	E	R	W	S	T						C	D	S	F	T	N	C	W	E	L	L	T	CPPC	6	5.69795e-05
193	CPPC	E	W	V	V	A	A					C	D	S	F	T	N	C	W	E	L	L	T	CPPC	6	5.69795e-05
194	CPPC	E	L	W	W	S						C	D	S	F	T	N	C	W	E	L	L	T	CPPC	6	5.69795e-05
195	CPPC	S	T	N	V	V	I	Y	A	R	E	C	D	S	F	T	N	C	W	E	L	L	T	CPPC	6	5.69795e-05
196	CPPC	S	L	V	L	K	E					C	D	S	F	T	N	C	W	E	L	L	T	CPPC	6	5.69795e-05
197	CPPC	S	W	W	E	R						C	D	S	F	T	N	C	W	E	L	L	T	CPPC	6	5.69795e-05
198	CPPC	L	R	M	R	G						C	D	S	F	T	N	C	W	E	L	L	T	CPPC	6	5.69795e-05
199	CPPC	L	H	L	E	W						C	D	S	F	T	N	C	W	E	L	L	T	CPPC	6	5.69795e-05
200	CPPC	T	R	L	E	W						C	D	S	F	T	N	C	W	E	L	L	T	CPPC	6	5.69795e-05
201	CPPC	T	F	M	V	R	E					C	D	S	F	T	N	C	W	E	L	L	T	CPPC	5	4.74829e-05
202	CPPC	M	E	W	V	L						C	D	S	F	T	N	C	W	E	L	L	T	CPPC	5	4.74829e-05
203	CPPC	I	R	W	E	Y						C	D	S	F	T	N	C	W	E	L	L	T	CPPC	5	4.74829e-05
204	CPPC	I	E	W	R	F						C	D	S	F	T	N	C	W	E	L	L	T	CPPC	5	4.74829e-05
205	CPPC	H	W	S	W	E						C	D	S	F	T	N	C	W	E	L	L	T	CPPC	5	4.74829e-05
206	CPPC	P	R	E	H	E	L	D	A	V	P	C	D	S	F	T	N	C	W	E	L	L	T	CPPC	5	4.74829e-05
207	CPPC	P	R	R	E	S	W	I	V	R	P	C	D	S	F	T	N	C	W	E	L	L	T	CPPC	5	4.74829e-05
208	CPPC	P	W	E	H	E	L	V	A	V	P	C	D	S	F	T	N	C	W	E	L	L	T	CPPC	5	4.74829e-05
209	CPPC	P	R	G	L	A	V	A	V	K	E	C	D	S	F	T	N	C	W	E	L	L	T	CPPC	5	4.74829e-05
210	CPPC	R	I	Q	V	R	E					C	D	S	F	T	N	C	W	E	L	L	T	CPPC	5	4.74829e-05
211	CPPC	G	P	A	R	S	T	E				C	D	S	F	T	N	C	W	E	L	L	T	CPPC	5	4.74829e-05
212	CPPC	G	R	W	R	V						C	D	S	F	T	N	C	W	E	L	L	T	CPPC	5	4.74829e-05
213	CPPC	G	P	R	R	L	W	V	A	V	P	C	D	S	F	T	N	C	W	E	L	L	T	CPPC	5	4.74829e-05
214	CPPC	V	R	W	A	E						C	D	S	F	T	N	C	W	E	L	L	T	CPPC	5	4.74829e-05
215	CPPC	V	E	E	P	L	I	M	I	R	S	C	D	S	F	T	N	C	W	E	L	L	T	CPPC	5	4.74829e-05
216	CPPC	V	A	V	V	M	W	V	V	Y	E	C	D	S	F	T	N	C	W	E	L	L	T	CPPC	5	4.74829e-05
217	CPPC	E	Y	R	V	L	P	R	F	W	W	C	D	S	F	T	N	C	W	E	L	L	T	CPPC	5	4.74829e-05
218	CPPC	E	W	S	F	G						C	D	S	F	T	N	C	W	E	L	L	T	CPPC	5	4.74829e-05
219	CPPC	E	L	W	A	E						C	D	S	F	T	N	C	W	E	L	L	T	CPPC	5	4.74829e-05
220	CPPC	E	F	M	T	R	P					C	D	S	F	T	N	C	W	E	L	L	T	CPPC	5	4.74829e-05
221	CPPC	Y	E	H	R	W						C	D	S	F	T	N	C	W	E	L	L	T	CPPC	5	4.74829e-05
222	CPPC	S	I	L	V	R	E					C	D	S	F	T	N	C	W	E	L	L	T	CPPC	5	4.74829e-05
223	CPPC	S	Y	V	V	T	W	L	V	R	E	C	D	S	F	T	N	C	W	E	L	L	T	CPPC	5	4.74829e-05
224	CPPC	F	N	V	E	S						C	D	S	F	T	N	C	W	E	L	L	T	CPPC	5	4.74829e-05
225	CPPC	K	F	E	R	I						C	D	S	F	T	N	C	W	E	L	L	T	CPPC	4	3.79863e-05
226	CPPC	R	E	F	H	W						C	D	S	F	T	N	C	W	E	L	L	T	CPPC	4	3.79863e-05
227	CPPC	M	P	W	L	L	W	E	W	S		C	D	S	F	T	N	C	W	E	L	L	T	CPPC	4	3.79863e-05
228	CPPC	M	E	Y	R	T						C	D	S	F	T	N	C	W	E	L	L	T	CPPC	4	3.79863e-05
229	CPPC	M	W	V	I	E	P					C	D	S	F	T	N	C	W	E	L	L	T	CPPC	4	3.79863e-05
230	CPPC	I	R	L	A	E						C	D	S	F	T	N	C	W	E	L	L	T	CPPC	4	3.79863e-05
231	CPPC	I	E	W	K	V						C	D	S	F	T	N	C	W	E	L	L	T	CPPC	4	3.79863e-05
232	CPPC	I	E	W	V	L						C	D	S	F	T	N	C	W	E	L	L	T	CPPC	4	3.79863e-05
233	CPPC	Q	R	E	H	E	L	V	A	V	P	C	D	S	F	T	N	C	W	E	L	L	T	CPPC	4	3.79863e-05
234	CPPC	Q	S	E	R	A	W	G	V	V	P	C	D	S	F	T	N	C	W	E	L	L	T	CPPC	4	3.79863e-05
235	CPPC	P	R	E	Q	E	L	V	A	V	P	C	D	S	F	T	N	C	W	E	L	L	T	CPPC	7	6.64761e-05
236	CPPC	P	R	E	H	Q	L	V	A	V	P	C	D	S	F	T	N	C	W	E	L	L	T	CPPC	4	3.79863e-05
237	CPPC	P	R	E	H	E	I	V	A	V	P	C	D	S	F	T	N	C	W	E	L	L	T	CPPC	4	3.79863e-05
238	CPPC	P	R	E	H	E	L	V	A	D	P	C	D	S	F	T	N	C	W	E	L	L	T	CPPC	4	3.79863e-05
239	CPPC	P	M	E	H	E	L	V	A	V	P	C	D	S	F	T	N	C	W	E	L	L	T	CPPC	4	3.79863e-05
240	CPPC	P	R	E	H	V	L	G	W	R	P	C	D	S	F	T	N	C	W	E	L	L	T	CPPC	4	3.79863e-05
241	CPPC	P	E	P	R	T	I	Y	V	L	H	C	D	S	F	T	N	C	W	E	L	L	T	CPPC	4	3.79863e-05
242	CPPC	P	S	T	Y	E	L	W	I	R	P	C	D	S	F	T	N	C	W	E	L	L	T	CPPC	4	3.79863e-05
243	CPPC	R	V	F	R	W						C	D	S	F	T	N	C	W	E	L	L	T	CPPC	4	3.79863e-05
244	CPPC	R	E	W	L	W						C	D	S	F	T	N	C	W	E	L	L	T	CPPC	4	3.79863e-05
245	CPPC	R	F	Q	R	W						C	D	S	F	T	N	C	W	E	L	L	T	CPPC	4	3.79863e-05
246	CPPC	R	R	L	L	L						C	D	S	F	T	N	C	W	E	L	L	T	CPPC	4	3.79863e-05
247	CPPC	R	I	E	F	Y						C	D	S	F	T	N	C	W	E	L	L	T	CPPC	4	3.79863e-05
248	CPPC	L	V	H	E	W						C	D	S	F	T	N	C	W	E	L	L	T	CPPC	4	3.79863e-05
249	CPPC	E	R	L	E	W						C	D	S	F	T	N	C	W	E	L	L	T	CPPC	4	3.79863e-05
250	CPPC	E	R	D	T	E	F	V	V	T	R	C	D	S	F	T	N	C	W	E	L	L	T	CPPC	4	3.79863e-05
251	CPPC	D	R	G	R	Y	Y	E	M	M	L	C	D	S	F	T	N	C	W	E	L	L	T	CPPC	4	3.79863e-05
252	CPPC	V	E	W	R	V						C	D	S	F	T	N	C	W	E	L	L	T	CPPC	5	4.74829e-05
253	CPPC	V	L	M	V	K	E					C	D	S	F	T	N	C	W	E	L	L	T	CPPC	4	3.79863e-05
254	CPPC	V	E	Y	S	Y						C	D	S	F	T	N	C	W	E	L	L	T	CPPC	4	3.79863e-05
255	CPPC	E	R	W	S	W						C	D	S	F	T	N	C	W	E	L	L	T	CPPC	4	3.79863e-05
256	CPPC	E	R	W	M	A						C	D	S	F	T	N	C	W	E	L	L	T	CPPC	6	5.69795e-05
257	CPPC	E	W	A	G	G						C	D	S	F	T	N	C	W	E	L	L	T	CPPC	4	3.79863e-05
258	CPPC	E	W	W	R	W						C	D	S	F	T	N	C	W	E	L	L	T	CPPC	4	3.79863e-05
259	CPPC	E	W	W	R	G						C	D	S	F	T	N	C	W	E	L	L	T	CPPC	4	3.79863e-05
260	CPPC	E	L	W	S	A						C	D	S	F	T	N	C	W	E	L	L	T	CPPC	4	3.79863e-05
261	CPPC	E	F	W	W	R	A					C	D	S	F	T	N	C	W	E	L	L	T	CPPC	4	3.79863e-05
262	CPPC	S	Q	W	E	W						C	D	S	F	T	N	C	W	E	L	L	T	CPPC	4	3.79863e-05
263	CPPC	S	Y	W	M	E						C	D	S	F	T	N	C	W	E	L	L	T	CPPC	4	3.79863e-05
264	CPPC	S	E	H	G	Y						C	D	S	F	T	N	C	W	E	L	L	T	CPPC	4	3.79863e-05
265	CPPC	S	F	M	L	K	E					C	D	S	F	T	N	C	W	E	L	L	T	CPPC	4	3.79863e-05
266	CPPC	W	R	W	A	E						C	D	S	F	T	N	C	W	E	L	L	T	CPPC	4	3.79863e-05
267	CPPC	L	R	L	W	E						C	D	S	F	T	N	C	W	E	L	L	T	CPPC	4	3.79863e-05
268	CPPC	L	H	M	E	M						C	D	S	F	T	N	C	W	E	L	L	T	CPPC	4	3.79863e-05
269	CPPC	F	R	T	W	E	T	W	S	V	R	C	D	S	F	T	N	C	W	E	L	L	T	CPPC	4	3.79863e-05
270	CPPC	F	R	Y	F	E						C	D	S	F	T	N	C	W	E	L	L	T	CPPC	4	3.79863e-05
271	CPPC	F	R	V	R	P						C	D	S	F	T	N	C	W	E	L	L	T	CPPC	4	3.79863e-05
272	CPPC	F	G	P	E	W	W	F	R	L		C	D	S	F	T	N	C	W	E	L	L	T	CPPC	4	3.79863e-05
273	CPPC	F	E	L	R	P						C	D	S	F	T	N	C	W	E	L	L	T	CPPC	4	3.79863e-05
274	CPPC	K	S	R	A	R	L					C	D	S	F	T	N	C	W	E	L	L	T	CPPC	3	2.84898e-05
275	CPPC	N	R	Q	E	V	L	V	V	V	P	C	D	S	F	T	N	C	W	E	L	L	T	CPPC	3	2.84898e-05
276	CPPC	N	L	Y	E	Y						C	D	S	F	T	N	C	W	E	L	L	T	CPPC	3	2.84898e-05
277	CPPC	T	G	S	G	I	F	Y	A	R	E	C	D	S	F	T	N	C	W	E	L	L	T	CPPC	3	2.84898e-05
278	CPPC	T	E	R	A	I	L	S	V	R	Q	C	D	S	F	T	N	C	W	E	L	L	T	CPPC	3	2.84898e-05
279	CPPC	T	E	W	R	G						C	D	S	F	T	N	C	W	E	L	L	T	CPPC	3	2.84898e-05
280	CPPC	S	E	W	Q	W						C	D	S	F	T	N	C	W	E	L	L	T	CPPC	3	2.84898e-05
281	CPPC	I	L	W	S	E						C	D	S	F	T	N	C	W	E	L	L	T	CPPC	3	2.84898e-05
282	CPPC	Q	P	Q	R	Y	L	Y	L	R	E	C	D	S	F	T	N	C	W	E	L	L	T	CPPC	3	2.84898e-05
283	CPPC	Q	A	S	T	V	W	K	V	S	E	C	D	S	F	T	N	C	W	E	L	L	T	CPPC	3	2.84898e-05
284	CPPC	Q	Y	F	M	V	R	E				C	D	S	F	T	N	C	W	E	L	L	T	CPPC	3	2.84898e-05
285	CPPC	H	E	Y	R	F						C	D	S	F	T	N	C	W	E	L	L	T	CPPC	3	2.84898e-05
286	CPPC	P	R	L	R	A	L	M	I	E	P	C	D	S	F	T	N	C	W	E	L	L	T	CPPC	3	2.84898e-05
287	CPPC	P	R	E	H	E	L	V	T	V	P	C	D	S	F	T	N	C	W	E	L	L	T	CPPC	3	2.84898e-05
288	CPPC	P	R	E	H	E	L	V	A	V	H	C	D	S	F	T	N	C	W	E	L	L	T	CPPC	3	2.84898e-05
289	CPPC	P	R	E	G	A	W	W	V	I	P	C	D	S	F	T	N	C	W	E	L	L	T	CPPC	3	2.84898e-05
290	CPPC	P	S	D	E	T	I	F	V	R	E	C	D	S	F	T	N	C	W	E	L	L	T	CPPC	3	2.84898e-05
291	CPPC	R	I	I	A	R	E	S	L	L		C	D	S	F	T	N	C	W	E	L	L	T	CPPC	3	2.84898e-05
292	CPPC	R	R	W	G	W						C	D	S	F	T	N	C	W	E	L	L	T	CPPC	3	2.84898e-05
293	CPPC	R	A	W	E	W						C	D	S	F	T	N	C	W	E	L	L	T	CPPC	3	2.84898e-05
294	CPPC	R	E	W	L	L						C	D	S	F	T	N	C	W	E	L	L	T	CPPC	3	2.84898e-05
295	CPPC	R	W	L	F	G	E					C	D	S	F	T	N	C	W	E	L	L	T	CPPC	3	2.84898e-05
296	CPPC	R	E	S	W	G						C	D	S	F	T	N	C	W	E	L	L	T	CPPC	3	2.84898e-05
297	CPPC	L	R	W	L	S						C	D	S	F	T	N	C	W	E	L	L	T	CPPC	3	2.84898e-05
298	CPPC	L	I	V	R	E						C	D	S	F	T	N	C	W	E	L	L	T	CPPC	3	2.84898e-05
299	CPPC	L	E	Y	R	P						C	D	S	F	T	N	C	W	E	L	L	T	CPPC	3	2.84898e-05
300	CPPC	D	R	V	Y	V	E	R	S	T	T	C	D	S	F	T	N	C	W	E	L	L	T	CPPC	3	2.84898e-05
301	CPPC	A	A	E	R	W						C	D	S	F	T	N	C	W	E	L	L	T	CPPC	3	2.84898e-05
302	CPPC	A	E	W	T	W						C	D	S	F	T	N	C	W	E	L	L	T	CPPC	3	2.84898e-05
303	CPPC	G	W	L	V	R	K					C	D	S	F	T	N	C	W	E	L	L	T	CPPC	3	2.84898e-05
304	CPPC	G	W	E	W	W						C	D	S	F	T	N	C	W	E	L	L	T	CPPC	3	2.84898e-05
305	CPPC	G	T	S	T	E	W	I	V	Q	P	C	D	S	F	T	N	C	W	E	L	L	T	CPPC	3	2.84898e-05
306	CPPC	G	R	E	A	E	W	L	V	R	E	C	D	S	F	T	N	C	W	E	L	L	T	CPPC	3	2.84898e-05
307	CPPC	G	E	A	G	M	W	R	V	R	P	C	D	S	F	T	N	C	W	E	L	L	T	CPPC	3	2.84898e-05
308	CPPC	V	A	L	L	E	S	W				C	D	S	F	T	N	C	W	E	L	L	T	CPPC	3	2.84898e-05
309	CPPC	V	S	V	G	E	F	Y	V	K	E	C	D	S	F	T	N	C	W	E	L	L	T	CPPC	3	2.84898e-05
310	CPPC	V	R	F	R	W						C	D	S	F	T	N	C	W	E	L	L	T	CPPC	3	2.84898e-05
311	CPPC	V	E	W	T	V						C	D	S	F	T	N	C	W	E	L	L	T	CPPC	3	2.84898e-05
312	CPPC	E	Q	D	S	E	V	F	A	R	P	C	D	S	F	T	N	C	W	E	L	L	T	CPPC	3	2.84898e-05
313	CPPC	E	R	W	S	Y						C	D	S	F	T	N	C	W	E	L	L	T	CPPC	3	2.84898e-05
314	CPPC	E	L	W	R	W						C	D	S	F	T	N	C	W	E	L	L	T	CPPC	3	2.84898e-05
315	CPPC	E	W	Q	R	W						C	D	S	F	T	N	C	W	E	L	L	T	CPPC	3	2.84898e-05
316	CPPC	E	W	R	G	W						C	D	S	F	T	N	C	W	E	L	L	T	CPPC	3	2.84898e-05
317	CPPC	E	W	E	M	W						C	D	S	F	T	N	C	W	E	L	L	T	CPPC	3	2.84898e-05
318	CPPC	Y	R	V	W	E						C	D	S	F	T	N	C	W	E	L	L	T	CPPC	3	2.84898e-05
319	CPPC	S	E	W	R	W						C	D	S	F	T	N	C	W	E	L	L	T	CPPC	4	3.79863e-05
320	CPPC	S	R	W	R	G						C	D	S	F	T	N	C	W	E	L	L	T	CPPC	3	2.84898e-05
321	CPPC	S	E	W	A	W						C	D	S	F	T	N	C	W	E	L	L	T	CPPC	6	5.69795e-05
322	CPPC	S	E	F	H	V						C	D	S	F	T	N	C	W	E	L	L	T	CPPC	3	2.84898e-05
323	CPPC	W	R	V	L	H	E					C	D	S	F	T	N	C	W	E	L	L	T	CPPC	3	2.84898e-05
324	CPPC	W	R	W	V	E						C	D	S	F	T	N	C	W	E	L	L	T	CPPC	3	2.84898e-05
325	CPPC	W	E	Y	R	T						C	D	S	F	T	N	C	W	E	L	L	T	CPPC	3	2.84898e-05
326	CPPC	L	R	E	A	G						C	D	S	F	T	N	C	W	E	L	L	T	CPPC	3	2.84898e-05
327	CPPC	L	Y	E	W	R						C	D	S	F	T	N	C	W	E	L	L	T	CPPC	3	2.84898e-05
328	CPPC	L	F	E	R	F						C	D	S	F	T	N	C	W	E	L	L	T	CPPC	3	2.84898e-05
329	CPPC	F	V	V	R	P	Y	R	G	V	G	C	D	S	F	T	N	C	W	E	L	L	T	CPPC	4	3.79863e-05
330	CPPC	K	E	F	G	W						C	D	S	F	T	N	C	W	E	L	L	T	CPPC	2	1.89932e-05
331	CPPC	K	W	F	E	W						C	D	S	F	T	N	C	W	E	L	L	T	CPPC	2	1.89932e-05
332	CPPC	N	G	S	M	H	F	W	E	W		C	D	S	F	T	N	C	W	E	L	L	T	CPPC	2	1.89932e-05
333	CPPC	T	L	W	R	E						C	D	S	F	T	N	C	W	E	L	L	T	CPPC	2	1.89932e-05
334	CPPC	T	E	L	M	S	H	W	K	W		C	D	S	F	T	N	C	W	E	L	L	T	CPPC	2	1.89932e-05
335	CPPC	T	M	R	S	V	R					C	D	S	F	T	N	C	W	E	L	L	T	CPPC	2	1.89932e-05
336	CPPC	T	H	W	S	E						C	D	S	F	T	N	C	W	E	L	L	T	CPPC	2	1.89932e-05
337	CPPC	T	R	W	R	W						C	D	S	F	T	N	C	W	E	L	L	T	CPPC	2	1.89932e-05
338	CPPC	T	E	Y	S	W						C	D	S	F	T	N	C	W	E	L	L	T	CPPC	2	1.89932e-05
339	CPPC	T	Y	W	R	E						C	D	S	F	T	N	C	W	E	L	L	T	CPPC	2	1.89932e-05
340	CPPC	T	S	L	E	W						C	D	S	F	T	N	C	W	E	L	L	T	CPPC	2	1.89932e-05
341	CPPC	R	I	V	W	W	W	E	F	R		C	D	S	F	T	N	C	W	E	L	L	T	CPPC	2	1.89932e-05
342	CPPC	R	P	W	R	Y						C	D	S	F	T	N	C	W	E	L	L	T	CPPC	2	1.89932e-05
343	CPPC	R	A	W	R	S						C	D	S	F	T	N	C	W	E	L	L	T	CPPC	2	1.89932e-05
344	CPPC	S	R	L	E	W						C	D	S	F	T	N	C	W	E	L	L	T	CPPC	2	1.89932e-05
345	CPPC	S	A	W	R	Y						C	D	S	F	T	N	C	W	E	L	L	T	CPPC	2	1.89932e-05
346	CPPC	S	E	W	V	L						C	D	S	F	T	N	C	W	E	L	L	T	CPPC	2	1.89932e-05
347	CPPC	M	M	Y	M	I	Y	E	R	W		C	D	S	F	T	N	C	W	E	L	L	T	CPPC	2	1.89932e-05
348	CPPC	M	E	V	W	K	S	R	W	G	S	C	D	S	F	T	N	C	W	E	L	L	T	CPPC	2	1.89932e-05
349	CPPC	I	E	V	W	P						C	D	S	F	T	N	C	W	E	L	L	T	CPPC	2	1.89932e-05
350	CPPC	I	E	W	S	F						C	D	S	F	T	N	C	W	E	L	L	T	CPPC	2	1.89932e-05
351	CPPC	I	L	V	M	P						C	D	S	F	T	N	C	W	E	L	L	T	CPPC	2	1.89932e-05
352	CPPC	Q	K	W	E	W						C	D	S	F	T	N	C	W	E	L	L	T	CPPC	2	1.89932e-05
353	CPPC	Q	H	A	E	W						C	D	S	F	T	N	C	W	E	L	L	T	CPPC	2	1.89932e-05
354	CPPC	Q	L	W	G	E	A	E	W	E		C	D	S	F	T	N	C	W	E	L	L	T	CPPC	2	1.89932e-05
355	CPPC	Q	A	E	P	A	F	W	A	R	R	C	D	S	F	T	N	C	W	E	L	L	T	CPPC	2	1.89932e-05
356	CPPC	Q	E	E	A	P	P	V	W	R	L	C	D	S	F	T	N	C	W	E	L	L	T	CPPC	2	1.89932e-05
357	CPPC	H	R	R	E	Y						C	D	S	F	T	N	C	W	E	L	L	T	CPPC	2	1.89932e-05
358	CPPC	H	G	W	G	F	E	T	F	W	M	C	D	S	F	T	N	C	W	E	L	L	T	CPPC	2	1.89932e-05
359	CPPC	H	Y	W	E	W						C	D	S	F	T	N	C	W	E	L	L	T	CPPC	2	1.89932e-05
360	CPPC	H	S	G	H	E	F	Y	V	R	K	C	D	S	F	T	N	C	W	E	L	L	T	CPPC	2	1.89932e-05
361	CPPC	H	F	L	V	R	E					C	D	S	F	T	N	C	W	E	L	L	T	CPPC	2	1.89932e-05
362	CPPC	H	F	W	W	E						C	D	S	F	T	N	C	W	E	L	L	T	CPPC	2	1.89932e-05
363	CPPC	P	T	E	H	E	L	V	A	V	P	C	D	S	F	T	N	C	W	E	L	L	T	CPPC	2	1.89932e-05
364	CPPC	P	R	E	H	E	L	V	A	V	T	C	D	S	F	T	N	C	W	E	L	L	T	CPPC	2	1.89932e-05
365	CPPC	P	R	E	H	E	L	V	G	V	P	C	D	S	F	T	N	C	W	E	L	L	T	CPPC	2	1.89932e-05
366	CPPC	P	R	E	P	Y	L	V	A	V	P	C	D	S	F	T	N	C	W	E	L	L	T	CPPC	2	1.89932e-05
367	CPPC	P	R	E	Y	E	L	V	A	V	P	C	D	S	F	T	N	C	W	E	L	L	T	CPPC	2	1.89932e-05
368	CPPC	P	R	S	E	L	I	L	T	R	P	C	D	S	F	T	N	C	W	E	L	L	T	CPPC	2	1.89932e-05
369	CPPC	P	R	S	S	E	L	M	V	A	P	C	D	S	F	T	N	C	W	E	L	L	T	CPPC	2	1.89932e-05
370	CPPC	P	R	L	P	K	I	Y	V	E	L	C	D	S	F	T	N	C	W	E	L	L	T	CPPC	2	1.89932e-05
371	CPPC	P	L	S	G	T	L	Y	I	R	E	C	D	S	F	T	N	C	W	E	L	L	T	CPPC	2	1.89932e-05
372	CPPC	P	R	P	A	A	L	Y	V	R	R	C	D	S	F	T	N	C	W	E	L	L	T	CPPC	2	1.89932e-05
373	CPPC	R	M	F	G	E						C	D	S	F	T	N	C	W	E	L	L	T	CPPC	2	1.89932e-05
374	CPPC	R	R	S	I	L						C	D	S	F	T	N	C	W	E	L	L	T	CPPC	2	1.89932e-05
375	CPPC	R	Y	A	F	R						C	D	S	F	T	N	C	W	E	L	L	T	CPPC	2	1.89932e-05
376	CPPC	R	S	S	V	A	W	L	V	V	E	C	D	S	F	T	N	C	W	E	L	L	T	CPPC	2	1.89932e-05
377	CPPC	R	S	W	R	H						C	D	S	F	T	N	C	W	E	L	L	T	CPPC	2	1.89932e-05
378	CPPC	R	F	M	V	R	E					C	D	S	F	T	N	C	W	E	L	L	T	CPPC	2	1.89932e-05
379	CPPC	R	F	W	R	W						C	D	S	F	T	N	C	W	E	L	L	T	CPPC	2	1.89932e-05
380	CPPC	R	R	A	A	W						C	D	S	F	T	N	C	W	E	L	L	T	CPPC	2	1.89932e-05
381	CPPC	R	L	S	W	I	T	I	A	R	E	C	D	S	F	T	N	C	W	E	L	L	T	CPPC	2	1.89932e-05
382	CPPC	R	E	P	L	V	L	F	R	G	I	C	D	S	F	T	N	C	W	E	L	L	T	CPPC	2	1.89932e-05
383	CPPC	R	W	E	V	R	E					C	D	S	F	T	N	C	W	E	L	L	T	CPPC	2	1.89932e-05
384	CPPC	L	R	A	G	F	L	F	V	K	E	C	D	S	F	T	N	C	W	E	L	L	T	CPPC	2	1.89932e-05
385	CPPC	L	L	E	R	L						C	D	S	F	T	N	C	W	E	L	L	T	CPPC	2	1.89932e-05
386	CPPC	L	A	E	W	V						C	D	S	F	T	N	C	W	E	L	L	T	CPPC	2	1.89932e-05
387	CPPC	L	E	W	G	F						C	D	S	F	T	N	C	W	E	L	L	T	CPPC	2	1.89932e-05
388	CPPC	L	W	E	F	M						C	D	S	F	T	N	C	W	E	L	L	T	CPPC	2	1.89932e-05
389	CPPC	L	W	*	A	T						C	D	S	F	T	N	C	W	E	L	L	T	CPPC	2	1.89932e-05
390	CPPC	L	F	W	R	E						C	D	S	F	T	N	C	W	E	L	L	T	CPPC	2	1.89932e-05
391	CPPC	L	R	W	E	R	S					C	D	S	F	T	N	C	W	E	L	L	T	CPPC	2	1.89932e-05
392	CPPC	L	R	W	R	T						C	D	S	F	T	N	C	W	E	L	L	T	CPPC	2	1.89932e-05
393	CPPC	L	L	W	R	R						C	D	S	F	T	N	C	W	E	L	L	T	CPPC	2	1.89932e-05
394	CPPC	L	E	F	G	L						C	D	S	F	T	N	C	W	E	L	L	T	CPPC	2	1.89932e-05
395	CPPC	E	V	T	G	M	M	L	G	H	G	C	D	S	F	T	N	C	W	E	L	L	T	CPPC	2	1.89932e-05
396	CPPC	D	W	P	A	V	S	R	E	W	L	C	D	S	F	T	N	C	W	E	L	L	T	CPPC	2	1.89932e-05
397	CPPC	A	R	F	R	V	K	A				C	D	S	F	T	N	C	W	E	L	L	T	CPPC	2	1.89932e-05
398	CPPC	A	L	W	E	W						C	D	S	F	T	N	C	W	E	L	L	T	CPPC	2	1.89932e-05
399	CPPC	A	L	L	V	R	E					C	D	S	F	T	N	C	W	E	L	L	T	CPPC	2	1.89932e-05
400	CPPC	A	E	W	P	E	F	W	V	R	R	C	D	S	F	T	N	C	W	E	L	L	T	CPPC	2	1.89932e-05
401	CPPC	A	V	L	R	L	V	T	E	R		C	D	S	F	T	N	C	W	E	L	L	T	CPPC	2	1.89932e-05
402	CPPC	A	E	Y	R	W						C	D	S	F	T	N	C	W	E	L	L	T	CPPC	2	1.89932e-05
403	CPPC	A	L	E	V	R	E					C	D	S	F	T	N	C	W	E	L	L	T	CPPC	2	1.89932e-05
404	CPPC	A	F	M	L	R	R					C	D	S	F	T	N	C	W	E	L	L	T	CPPC	2	1.89932e-05
405	CPPC	A	P	S	L	E	L	Y	F	R	S	C	D	S	F	T	N	C	W	E	L	L	T	CPPC	2	1.89932e-05
406	CPPC	G	K	W	E	W						C	D	S	F	T	N	C	W	E	L	L	T	CPPC	2	1.89932e-05
407	CPPC	G	I	P	P	E						C	D	S	F	T	N	C	W	E	L	L	T	CPPC	2	1.89932e-05
408	CPPC	G	T	A	T	E	W	I	V	H	P	C	D	S	F	T	N	C	W	E	L	L	T	CPPC	2	1.89932e-05
409	CPPC	G	L	V	V	R	E					C	D	S	F	T	N	C	W	E	L	L	T	CPPC	2	1.89932e-05
410	CPPC	V	A	L	W	V						C	D	S	F	T	N	C	W	E	L	L	T	CPPC	2	1.89932e-05
411	CPPC	V	W	W	A	E						C	D	S	F	T	N	C	W	E	L	L	T	CPPC	3	2.84898e-05
412	CPPC	V	R	E	S	W						C	D	S	F	T	N	C	W	E	L	L	T	CPPC	2	1.89932e-05
413	CPPC	V	R	G	E	H	V	W	W	E	W	C	D	S	F	T	N	C	W	E	L	L	T	CPPC	2	1.89932e-05
414	CPPC	V	E	L	G	W						C	D	S	F	T	N	C	W	E	L	L	T	CPPC	2	1.89932e-05
415	CPPC	V	E	W	F	H						C	D	S	F	T	N	C	W	E	L	L	T	CPPC	2	1.89932e-05
416	CPPC	V	F	R	E	L						C	D	S	F	T	N	C	W	E	L	L	T	CPPC	2	1.89932e-05
417	CPPC	E	K	S	R	L	W	L	V	R	L	C	D	S	F	T	N	C	W	E	L	L	T	CPPC	2	1.89932e-05
418	CPPC	E	S	L	W	V	E					C	D	S	F	T	N	C	W	E	L	L	T	CPPC	2	1.89932e-05
419	CPPC	E	R	W	K	Y						C	D	S	F	T	N	C	W	E	L	L	T	CPPC	2	1.89932e-05
420	CPPC	E	R	W	R	A						C	D	S	F	T	N	C	W	E	L	L	T	CPPC	2	1.89932e-05
421	CPPC	E	R	W	E	G						C	D	S	F	T	N	C	W	E	L	L	T	CPPC	2	1.89932e-05
422	CPPC	E	R	W	F	G						C	D	S	F	T	N	C	W	E	L	L	T	CPPC	2	1.89932e-05
423	CPPC	E	R	W	R	F						C	D	S	F	T	N	C	W	E	L	L	T	CPPC	2	1.89932e-05
424	CPPC	E	L	F	V	R	E					C	D	S	F	T	N	C	W	E	L	L	T	CPPC	2	1.89932e-05
425	CPPC	E	L	R	L	L						C	D	S	F	T	N	C	W	E	L	L	T	CPPC	2	1.89932e-05
426	CPPC	E	G	H	E	T	D	M	L	V	W	C	D	S	F	T	N	C	W	E	L	L	T	CPPC	2	1.89932e-05
427	CPPC	E	G	V	W	L	E	Y	V	W		C	D	S	F	T	N	C	W	E	L	L	T	CPPC	2	1.89932e-05
428	CPPC	E	G	P	V	V	S	L	E	E		C	D	S	F	T	N	C	W	E	L	L	T	CPPC	2	1.89932e-05
429	CPPC	E	E	S	D	T	A	R	V	V	I	C	D	S	F	T	N	C	W	E	L	L	T	CPPC	2	1.89932e-05
430	CPPC	E	Y	L	W	W						C	D	S	F	T	N	C	W	E	L	L	T	CPPC	2	1.89932e-05
431	CPPC	E	S	W	K	W						C	D	S	F	T	N	C	W	E	L	L	T	CPPC	2	1.89932e-05
432	CPPC	E	S	P	G	L	T	H	V	G	A	C	D	S	F	T	N	C	W	E	L	L	T	CPPC	2	1.89932e-05
433	CPPC	E	W	G	R	W						C	D	S	F	T	N	C	W	E	L	L	T	CPPC	2	1.89932e-05
434	CPPC	E	W	G	W	A						C	D	S	F	T	N	C	W	E	L	L	T	CPPC	2	1.89932e-05
435	CPPC	E	W	S	R	Q	W	W	W	W		C	D	S	F	T	N	C	W	E	L	L	T	CPPC	3	2.84898e-05
436	CPPC	E	W	W	A	V						C	D	S	F	T	N	C	W	E	L	L	T	CPPC	2	1.89932e-05
437	CPPC	E	L	M	W	L	G					C	D	S	F	T	N	C	W	E	L	L	T	CPPC	2	1.89932e-05
438	CPPC	E	L	L	E	L						C	D	S	F	T	N	C	W	E	L	L	T	CPPC	2	1.89932e-05
439	CPPC	E	F	Y	L	R	N					C	D	S	F	T	N	C	W	E	L	L	T	CPPC	2	1.89932e-05
440	CPPC	Y	L	V	P	E	W	W				C	D	S	F	T	N	C	W	E	L	L	T	CPPC	2	1.89932e-05
441	CPPC	S	Q	L	P	V	L	L	V	R	E	C	D	S	F	T	N	C	W	E	L	L	T	CPPC	2	1.89932e-05
442	CPPC	S	A	V	P	D	T	G	F	G	P	C	D	S	F	T	N	C	W	E	L	L	T	CPPC	2	1.89932e-05
443	CPPC	S	G	T	T	E	W	W	V	R	A	C	D	S	F	T	N	C	W	E	L	L	T	CPPC	2	1.89932e-05
444	CPPC	S	V	V	I	E	A					C	D	S	F	T	N	C	W	E	L	L	T	CPPC	2	1.89932e-05
445	CPPC	S	E	H	R	W						C	D	S	F	T	N	C	W	E	L	L	T	CPPC	2	1.89932e-05
446	CPPC	S	E	Y	V	W						C	D	S	F	T	N	C	W	E	L	L	T	CPPC	2	1.89932e-05
447	CPPC	S	E	W	Q	Y						C	D	S	F	T	N	C	W	E	L	L	T	CPPC	2	1.89932e-05
448	CPPC	S	E	W	A	Y						C	D	S	F	T	N	C	W	E	L	L	T	CPPC	2	1.89932e-05
449	CPPC	S	E	W	S	V						C	D	S	F	T	N	C	W	E	L	L	T	CPPC	2	1.89932e-05
450	CPPC	S	S	Q	R	E	W	V	L	V	K	C	D	S	F	T	N	C	W	E	L	L	T	CPPC	2	1.89932e-05
451	CPPC	S	F	W	R	G	S	V				C	D	S	F	T	N	C	W	E	L	L	T	CPPC	2	1.89932e-05
452	CPPC	S	F	E	V	R	R					C	D	S	F	T	N	C	W	E	L	L	T	CPPC	2	1.89932e-05
453	CPPC	W	R	A	L	R	W	E	L	V		C	D	S	F	T	N	C	W	E	L	L	T	CPPC	2	1.89932e-05
454	CPPC	W	L	W	L	E						C	D	S	F	T	N	C	W	E	L	L	T	CPPC	2	1.89932e-05
455	CPPC	W	A	E	F	L						C	D	S	F	T	N	C	W	E	L	L	T	CPPC	2	1.89932e-05
456	CPPC	W	G	V	S	E						C	D	S	F	T	N	C	W	E	L	L	T	CPPC	2	1.89932e-05
457	CPPC	W	E	V	R	P						C	D	S	F	T	N	C	W	E	L	L	T	CPPC	2	1.89932e-05
458	CPPC	W	S	W	G	E						C	D	S	F	T	N	C	W	E	L	L	T	CPPC	2	1.89932e-05
459	CPPC	W	L	L	I	G	E					C	D	S	F	T	N	C	W	E	L	L	T	CPPC	2	1.89932e-05
460	CPPC	W	L	E	R	W						C	D	S	F	T	N	C	W	E	L	L	T	CPPC	2	1.89932e-05
461	CPPC	L	H	E	Y	H	V	T	Q	F	I	C	D	S	F	T	N	C	W	E	L	L	T	CPPC	2	1.89932e-05
462	CPPC	L	H	E	S	G						C	D	S	F	T	N	C	W	E	L	L	T	CPPC	2	1.89932e-05
463	CPPC	L	L	A	W	E						C	D	S	F	T	N	C	W	E	L	L	T	CPPC	2	1.89932e-05
464	CPPC	L	L	V	S	E						C	D	S	F	T	N	C	W	E	L	L	T	CPPC	2	1.89932e-05
465	CPPC	L	A	Y	W	E						C	D	S	F	T	N	C	W	E	L	L	T	CPPC	2	1.89932e-05
466	CPPC	F	H	E	F	R	L					C	D	S	F	T	N	C	W	E	L	L	T	CPPC	2	1.89932e-05
467	CPPC	F	E	L	I	P						C	D	S	F	T	N	C	W	E	L	L	T	CPPC	2	1.89932e-05
468	CPPC	F	Y	S	E	W						C	D	S	F	T	N	C	W	E	L	L	T	CPPC	2	1.89932e-05
469	CPPC	F	W	E	R	W						C	D	S	F	T	N	C	W	E	L	L	T	CPPC	2	1.89932e-05
470	CPPC	K	N	E	V	F	E	L	I	V		C	D	S	F	T	N	C	W	E	L	L	T	CPPC	1	9.49659e-06
471	CPPC	K	I	L	V	V	P	S	E	R		C	D	S	F	T	N	C	W	E	L	L	T	CPPC	1	9.49659e-06
472	CPPC	K	S	E	F	F	W	S	A	W		C	D	S	F	T	N	C	W	E	L	L	T	CPPC	1	9.49659e-06
473	CPPC	K	F	T	V	R	E					C	D	S	F	T	N	C	W	E	L	L	T	CPPC	1	9.49659e-06
474	CPPC	K	F	L	V	R	E					C	D	S	F	T	N	C	W	E	L	L	T	CPPC	1	9.49659e-06
475	CPPC	N	R	F	E	W						C	D	S	F	T	N	C	W	E	L	L	T	CPPC	1	9.49659e-06
476	CPPC	N	E	W	H	Y						C	D	S	F	T	N	C	W	E	L	L	T	CPPC	1	9.49659e-06
477	CPPC	N	W	E	L	R						C	D	S	F	T	N	C	W	E	L	L	T	CPPC	1	9.49659e-06
478	CPPC	T	K	E	P	L	Y	L	V	R	S	C	D	S	F	T	N	C	W	E	L	L	T	CPPC	1	9.49659e-06
479	CPPC	T	T	T	V	V						C	D	S	F	T	N	C	W	E	L	L	T	CPPC	1	9.49659e-06
480	CPPC	T	R	M	L	V	W	A	V	L	E	C	D	S	F	T	N	C	W	E	L	L	T	CPPC	1	9.49659e-06
481	CPPC	T	R	E	H	E	L	V	A	V	P	C	D	S	F	T	N	C	W	E	L	L	T	CPPC	1	9.49659e-06
482	CPPC	T	M	E	R	W	Q	P	L	R		C	D	S	F	T	N	C	W	E	L	L	T	CPPC	1	9.49659e-06
483	CPPC	T	L	E	W	G						C	D	S	F	T	N	C	W	E	L	L	T	CPPC	1	9.49659e-06
484	CPPC	T	A	L	Y	G	E	W				C	D	S	F	T	N	C	W	E	L	L	T	CPPC	1	9.49659e-06
485	CPPC	T	G	R	W	A	R	F	L	E		C	D	S	F	T	N	C	W	E	L	L	T	CPPC	1	9.49659e-06
486	CPPC	T	E	A	A	E	V	F	V	R	P	C	D	S	F	T	N	C	W	E	L	L	T	CPPC	1	9.49659e-06
487	CPPC	T	E	W	S	W						C	D	S	F	T	N	C	W	E	L	L	T	CPPC	1	9.49659e-06
488	CPPC	T	Y	W	K	E						C	D	S	F	T	N	C	W	E	L	L	T	CPPC	1	9.49659e-06
489	CPPC	T	S	W	I	W	E					C	D	S	F	T	N	C	W	E	L	L	T	CPPC	1	9.49659e-06
490	CPPC	T	W	P	W	D	R	P				C	D	S	F	T	N	C	W	E	L	L	T	CPPC	1	9.49659e-06
491	CPPC	T	W	P	W	D	R	A				C	D	S	F	T	N	C	W	E	L	L	T	CPPC	1	9.49659e-06
492	CPPC	T	F	L	Y	H	E					C	D	S	F	T	N	C	W	E	L	L	T	CPPC	1	9.49659e-06
493	CPPC	T	F	E	F	E						C	D	S	F	T	N	C	W	E	L	L	T	CPPC	1	9.49659e-06
494	CPPC	T	T	L	D	S	W	F	W	E		C	D	S	F	T	N	C	W	E	L	L	T	CPPC	1	9.49659e-06
495	CPPC	T	L	I	V	R	E					C	D	S	F	T	N	C	W	E	L	L	T	CPPC	1	9.49659e-06
496	CPPC	T	E	W	R	R						C	D	S	F	T	N	C	W	E	L	L	T	CPPC	1	9.49659e-06
497	CPPC	T	S	L	H	Q	F	W	L	E	G	C	D	S	F	T	N	C	W	E	L	L	T	CPPC	1	9.49659e-06
498	CPPC	T	F	I	I	N	E					C	D	S	F	T	N	C	W	E	L	L	T	CPPC	1	9.49659e-06
499	CPPC	R	Q	R	S	P	E					C	D	S	F	T	N	C	W	E	L	L	T	CPPC	1	9.49659e-06
500	CPPC	R	P	S	R	A	L	L	V	L	E	C	D	S	F	T	N	C	W	E	L	L	T	CPPC	1	9.49659e-06
501	CPPC	R	G	F	R	W						C	D	S	F	T	N	C	W	E	L	L	T	CPPC	1	9.49659e-06
502	CPPC	R	V	W	R	Y						C	D	S	F	T	N	C	W	E	L	L	T	CPPC	1	9.49659e-06
503	CPPC	R	E	P	R	E	N					C	D	S	F	T	N	C	W	E	L	L	T	CPPC	1	9.49659e-06
504	CPPC	R	E	W	T	W						C	D	S	F	T	N	C	W	E	L	L	T	CPPC	1	9.49659e-06
505	CPPC	R	E	W	G	W						C	D	S	F	T	N	C	W	E	L	L	T	CPPC	1	9.49659e-06
506	CPPC	R	E	L	A	W	W					C	D	S	F	T	N	C	W	E	L	L	T	CPPC	1	9.49659e-06
507	CPPC	R	S	W	R	Y						C	D	S	F	T	N	C	W	E	L	L	T	CPPC	1	9.49659e-06
508	CPPC	R	S	F	R	A	V	I	W	G	S	C	D	S	F	T	N	C	W	E	L	L	T	CPPC	1	9.49659e-06
509	CPPC	R	W	G	F	E						C	D	S	F	T	N	C	W	E	L	L	T	CPPC	1	9.49659e-06
510	CPPC	R	W	W	V	R	A					C	D	S	F	T	N	C	W	E	L	L	T	CPPC	1	9.49659e-06
511	CPPC	R	F	Y	V	K	R					C	D	S	F	T	N	C	W	E	L	L	T	CPPC	1	9.49659e-06
512	CPPC	S	I	E	V	V	P					C	D	S	F	T	N	C	W	E	L	L	T	CPPC	1	9.49659e-06
513	CPPC	S	R	S	E	T	S	L	V	W		C	D	S	F	T	N	C	W	E	L	L	T	CPPC	1	9.49659e-06
514	CPPC	S	D	E	A	S	E	S	R	G		C	D	S	F	T	N	C	W	E	L	L	T	CPPC	1	9.49659e-06
515	CPPC	S	E	Y	V	K	S	L	L	I		C	D	S	F	T	N	C	W	E	L	L	T	CPPC	1	9.49659e-06
516	CPPC	S	F	L	V	T	E					C	D	S	F	T	N	C	W	E	L	L	T	CPPC	1	9.49659e-06
517	CPPC	M	H	W	H	E						C	D	S	F	T	N	C	W	E	L	L	T	CPPC	1	9.49659e-06
518	CPPC	M	R	W	G	E						C	D	S	F	T	N	C	W	E	L	L	T	CPPC	1	9.49659e-06
519	CPPC	M	A	F	T	E						C	D	S	F	T	N	C	W	E	L	L	T	CPPC	1	9.49659e-06
520	CPPC	M	E	Y	R	F						C	D	S	F	T	N	C	W	E	L	L	T	CPPC	1	9.49659e-06
521	CPPC	M	F	T	E	F	E	V	G	S	V	C	D	S	F	T	N	C	W	E	L	L	T	CPPC	1	9.49659e-06
522	CPPC	M	F	W	Y	E	Y					C	D	S	F	T	N	C	W	E	L	L	T	CPPC	1	9.49659e-06
523	CPPC	I	R	E	L	W						C	D	S	F	T	N	C	W	E	L	L	T	CPPC	1	9.49659e-06
524	CPPC	I	M	V	P	S	Q	W	W	H	G	C	D	S	F	T	N	C	W	E	L	L	T	CPPC	1	9.49659e-06
525	CPPC	I	E	W	Q	M						C	D	S	F	T	N	C	W	E	L	L	T	CPPC	1	9.49659e-06
526	CPPC	I	E	W	A	A						C	D	S	F	T	N	C	W	E	L	L	T	CPPC	1	9.49659e-06
527	CPPC	I	S	W	R	E						C	D	S	F	T	N	C	W	E	L	L	T	CPPC	1	9.49659e-06
528	CPPC	Q	K	E	V	W						C	D	S	F	T	N	C	W	E	L	L	T	CPPC	1	9.49659e-06
529	CPPC	Q	R	S	R	G	N	P	G	W		C	D	S	F	T	N	C	W	E	L	L	T	CPPC	1	9.49659e-06
530	CPPC	Q	E	E	E	L	V	Y	R	E		C	D	S	F	T	N	C	W	E	L	L	T	CPPC	1	9.49659e-06
531	CPPC	Q	E	W	R	Y						C	D	S	F	T	N	C	W	E	L	L	T	CPPC	1	9.49659e-06
532	CPPC	Q	E	L	G	W						C	D	S	F	T	N	C	W	E	L	L	T	CPPC	1	9.49659e-06
533	CPPC	Q	Y	S	H	W						C	D	S	F	T	N	C	W	E	L	L	T	CPPC	1	9.49659e-06
534	CPPC	Q	S	R	R	W						C	D	S	F	T	N	C	W	E	L	L	T	CPPC	1	9.49659e-06
535	CPPC	Q	S	I	A	E	E					C	D	S	F	T	N	C	W	E	L	L	T	CPPC	1	9.49659e-06
536	CPPC	Q	W	A	E	W						C	D	S	F	T	N	C	W	E	L	L	T	CPPC	1	9.49659e-06
537	CPPC	Q	W	V	F	E						C	D	S	F	T	N	C	W	E	L	L	T	CPPC	1	9.49659e-06
538	CPPC	Q	F	W	E	W						C	D	S	F	T	N	C	W	E	L	L	T	CPPC	1	9.49659e-06
539	CPPC	H	S	S	E	W						C	D	S	F	T	N	C	W	E	L	L	T	CPPC	1	9.49659e-06
540	CPPC	H	Q	V	E	W						C	D	S	F	T	N	C	W	E	L	L	T	CPPC	1	9.49659e-06
541	CPPC	H	P	R	W	E	F	L	V	R	A	C	D	S	F	T	N	C	W	E	L	L	T	CPPC	1	9.49659e-06
542	CPPC	H	R	M	E	W						C	D	S	F	T	N	C	W	E	L	L	T	CPPC	1	9.49659e-06
543	CPPC	H	R	V	E	W						C	D	S	F	T	N	C	W	E	L	L	T	CPPC	1	9.49659e-06
544	CPPC	H	R	W	E	S						C	D	S	F	T	N	C	W	E	L	L	T	CPPC	1	9.49659e-06
545	CPPC	H	R	L	R	W						C	D	S	F	T	N	C	W	E	L	L	T	CPPC	1	9.49659e-06
546	CPPC	H	L	V	E	W						C	D	S	F	T	N	C	W	E	L	L	T	CPPC	1	9.49659e-06
547	CPPC	H	V	L	V	L	E					C	D	S	F	T	N	C	W	E	L	L	T	CPPC	1	9.49659e-06
548	CPPC	H	V	L	F	R	E					C	D	S	F	T	N	C	W	E	L	L	T	CPPC	1	9.49659e-06
549	CPPC	H	E	W	F	A						C	D	S	F	T	N	C	W	E	L	L	T	CPPC	1	9.49659e-06
550	CPPC	H	S	W	E	W						C	D	S	F	T	N	C	W	E	L	L	T	CPPC	1	9.49659e-06
551	CPPC	P	K	E	H	E	L	V	A	V	P	C	D	S	F	T	N	C	W	E	L	L	T	CPPC	1	9.49659e-06
552	CPPC	P	R	Y	G	S	V	H	V	I	P	C	D	S	F	T	N	C	W	E	L	L	T	CPPC	1	9.49659e-06
553	CPPC	P	R	E	H	E	H	V	A	V	P	C	D	S	F	T	N	C	W	E	L	L	T	CPPC	1	9.49659e-06
554	CPPC	P	R	E	H	E	L	I	A	V	P	C	D	S	F	T	N	C	W	E	L	L	T	CPPC	1	9.49659e-06
555	CPPC	P	R	E	H	E	L	A	A	V	P	C	D	S	F	T	N	C	W	E	L	L	T	CPPC	1	9.49659e-06
556	CPPC	P	R	E	H	E	L	V	A	G	P	C	D	S	F	T	N	C	W	E	L	L	T	CPPC	1	9.49659e-06
557	CPPC	P	R	E	H	E	L	V	A	V	P	C	D	S	F	T	N	C	W	E	L	L	T	CPPC	1	9.49659e-06
558	CPPC	P	R	E	H	E	L	V	A	V	P	C	D	S	F	T	N	C	W	E	L	L	T	CPPC	1	9.49659e-06
559	CPPC	P	R	E	H	E	L	V	A	V	P	C	D	S	F	T	N	C	W	E	L	L	T	CPPC	1	9.49659e-06
560	CPPC	P	R	E	H	E	L	V	A	V	F	C	D	S	F	T	N	C	W	E	L	L	T	CPPC	1	9.49659e-06
561	CPPC	P	R	E	H	S	L	V	A	V	P	C	D	S	F	T	N	C	W	E	L	L	T	CPPC	1	9.49659e-06
562	CPPC	P	R	E	H	W	L	V	V	V	P	C	D	S	F	T	N	C	W	E	L	L	T	CPPC	1	9.49659e-06
563	CPPC	P	R	E	V	G						C	D	S	F	T	N	C	W	E	L	L	T	CPPC	1	9.49659e-06
564	CPPC	P	R	W	E	Y						C	D	S	F	T	N	C	W	E	L	L	T	CPPC	1	9.49659e-06
565	CPPC	P	S	S	A	V	L	V	I	E	S	C	D	S	F	T	N	C	W	E	L	L	T	CPPC	1	9.49659e-06
566	CPPC	P	I	R	L	S	F	R	L	L		C	D	S	F	T	N	C	W	E	L	L	T	CPPC	1	9.49659e-06
567	CPPC	P	R	G	W	V	W	V	V	W	A	C	D	S	F	T	N	C	W	E	L	L	T	CPPC	1	9.49659e-06
568	CPPC	P	W	E	H	E	R	V	A	V	P	C	D	S	F	T	N	C	W	E	L	L	T	CPPC	1	9.49659e-06
569	CPPC	P	F	G	E	F	H	L	A	W	R	C	D	S	F	T	N	C	W	E	L	L	T	CPPC	1	9.49659e-06
570	CPPC	P	F	Y	R	Y						C	D	S	F	T	N	C	W	E	L	L	T	CPPC	1	9.49659e-06
571	CPPC	P	R	V	G	T	E	F	W	R	V	C	D	S	F	T	N	C	W	E	L	L	T	CPPC	1	9.49659e-06
572	CPPC	P	R	G	S	S	V	E	V	L	P	C	D	S	F	T	N	C	W	E	L	L	T	CPPC	1	9.49659e-06
573	CPPC	P	A	M	V	M	F	L	V	R	E	C	D	S	F	T	N	C	W	E	L	L	T	CPPC	1	9.49659e-06
574	CPPC	P	G	A	F	E						C	D	S	F	T	N	C	W	E	L	L	T	CPPC	1	9.49659e-06
575	CPPC	R	R	E	H	E	L	V	A	V	P	C	D	S	F	T	N	C	W	E	L	L	T	CPPC	1	9.49659e-06
576	CPPC	R	R	W	F	Q						C	D	S	F	T	N	C	W	E	L	L	T	CPPC	1	9.49659e-06
577	CPPC	R	R	I	W	L	A	Y				C	D	S	F	T	N	C	W	E	L	L	T	CPPC	1	9.49659e-06
578	CPPC	R	G	V	R	Y						C	D	S	F	T	N	C	W	E	L	L	T	CPPC	1	9.49659e-06
579	CPPC	R	G	W	W	E						C	D	S	F	T	N	C	W	E	L	L	T	CPPC	1	9.49659e-06
580	CPPC	R	V	S	H	E	W	L	V	V	P	C	D	S	F	T	N	C	W	E	L	L	T	CPPC	1	9.49659e-06
581	CPPC	R	E	W	A	W						C	D	S	F	T	N	C	W	E	L	L	T	CPPC	1	9.49659e-06
582	CPPC	R	E	F	L	W						C	D	S	F	T	N	C	W	E	L	L	T	CPPC	1	9.49659e-06
583	CPPC	R	Y	E	R	W						C	D	S	F	T	N	C	W	E	L	L	T	CPPC	1	9.49659e-06
584	CPPC	R	S	S	E	L	W	T	V	R	W	C	D	S	F	T	N	C	W	E	L	L	T	CPPC	1	9.49659e-06
585	CPPC	R	S	E	S	Y	M	S	I	W	G	C	D	S	F	T	N	C	W	E	L	L	T	CPPC	1	9.49659e-06
586	CPPC	R	W	E	W	W						C	D	S	F	T	N	C	W	E	L	L	T	CPPC	1	9.49659e-06
587	CPPC	R	F	T	R	W						C	D	S	F	T	N	C	W	E	L	L	T	CPPC	1	9.49659e-06
588	CPPC	R	F	H	W	E						C	D	S	F	T	N	C	W	E	L	L	T	CPPC	1	9.49659e-06
589	CPPC	R	F	L	I	R	E	W	V	V	L	C	D	S	F	T	N	C	W	E	L	L	T	CPPC	1	9.49659e-06
590	CPPC	R	F	F	L	W	P					C	D	S	F	T	N	C	W	E	L	L	T	CPPC	1	9.49659e-06
591	CPPC	R	R	E	A	W						C	D	S	F	T	N	C	W	E	L	L	T	CPPC	1	9.49659e-06
592	CPPC	R	Q	W	R	W						C	D	S	F	T	N	C	W	E	L	L	T	CPPC	1	9.49659e-06
593	CPPC	R	R	Q	A	W						C	D	S	F	T	N	C	W	E	L	L	T	CPPC	1	9.49659e-06
594	CPPC	R	L	D	E	W						C	D	S	F	T	N	C	W	E	L	L	T	CPPC	1	9.49659e-06
595	CPPC	R	E	E	Y	T	L	Y	I	R	E	C	D	S	F	T	N	C	W	E	L	L	T	CPPC	1	9.49659e-06
596	CPPC	R	E	L	V	W						C	D	S	F	T	N	C	W	E	L	L	T	CPPC	1	9.49659e-06
597	CPPC	R	E	W	R	L						C	D	S	F	T	N	C	W	E	L	L	T	CPPC	1	9.49659e-06
598	CPPC	R	E	W	A	L	T					C	D	S	F	T	N	C	W	E	L	L	T	CPPC	1	9.49659e-06
599	CPPC	R	Y	W	E	W						C	D	S	F	T	N	C	W	E	L	L	T	CPPC	1	9.49659e-06
600	CPPC	R	S	Y	E	W						C	D	S	F	T	N	C	W	E	L	L	T	CPPC	1	9.49659e-06
601	CPPC	R	W	I	G	E						C	D	S	F	T	N	C	W	E	L	L	T	CPPC	1	9.49659e-06
602	CPPC	R	W	W	R	W						C	D	S	F	T	N	C	W	E	L	L	T	CPPC	1	9.49659e-06
603	CPPC	R	L	S	E	W						C	D	S	F	T	N	C	W	E	L	L	T	CPPC	1	9.49659e-06
604	CPPC	R	L	M	E	W						C	D	S	F	T	N	C	W	E	L	L	T	CPPC	1	9.49659e-06
605	CPPC	R	L	W	R	M						C	D	S	F	T	N	C	W	E	L	L	T	CPPC	1	9.49659e-06
606	CPPC	R	F	W	R	L						C	D	S	F	T	N	C	W	E	L	L	T	CPPC	1	9.49659e-06
607	CPPC	L	T	Q	F	W	E					C	D	S	F	T	N	C	W	E	L	L	T	CPPC	1	9.49659e-06
608	CPPC	L	R	G	W	W	P					C	D	S	F	T	N	C	W	E	L	L	T	CPPC	1	9.49659e-06
609	CPPC	L	R	W	E	W						C	D	S	F	T	N	C	W	E	L	L	T	CPPC	1	9.49659e-06
610	CPPC	L	S	E	W	R						C	D	S	F	T	N	C	W	E	L	L	T	CPPC	1	9.49659e-06
611	CPPC	L	S	W	R	E						C	D	S	F	T	N	C	W	E	L	L	T	CPPC	1	9.49659e-06
612	CPPC	L	S	W	E	W						C	D	S	F	T	N	C	W	E	L	L	T	CPPC	1	9.49659e-06
613	CPPC	L	M	V	A	E						C	D	S	F	T	N	C	W	E	L	L	T	CPPC	1	9.49659e-06
614	CPPC	L	R	L	G	P	R	R	G	F		C	D	S	F	T	N	C	W	E	L	L	T	CPPC	1	9.49659e-06
615	CPPC	L	R	W	E	S						C	D	S	F	T	N	C	W	E	L	L	T	CPPC	1	9.49659e-06
616	CPPC	L	L	I	L	E						C	D	S	F	T	N	C	W	E	L	L	T	CPPC	1	9.49659e-06
617	CPPC	L	L	W	W	E						C	D	S	F	T	N	C	W	E	L	L	T	CPPC	1	9.49659e-06
618	CPPC	L	E	S	L	W						C	D	S	F	T	N	C	W	E	L	L	T	CPPC	1	9.49659e-06
619	CPPC	L	E	W	T	G						C	D	S	F	T	N	C	W	E	L	L	T	CPPC	1	9.49659e-06
620	CPPC	L	E	W	S	V						C	D	S	F	T	N	C	W	E	L	L	T	CPPC	1	9.49659e-06
621	CPPC	L	E	W	V	H						C	D	S	F	T	N	C	W	E	L	L	T	CPPC	1	9.49659e-06
622	CPPC	L	E	L	R	H						C	D	S	F	T	N	C	W	E	L	L	T	CPPC	1	9.49659e-06
623	CPPC	L	E	F	L	G						C	D	S	F	T	N	C	W	E	L	L	T	CPPC	1	9.49659e-06
624	CPPC	L	Y	E	R	W						C	D	S	F	T	N	C	W	E	L	L	T	CPPC	1	9.49659e-06
625	CPPC	L	W	L	R	E						C	D	S	F	T	N	C	W	E	L	L	T	CPPC	1	9.49659e-06
626	CPPC	L	W	F	M	E						C	D	S	F	T	N	C	W	E	L	L	T	CPPC	1	9.49659e-06
627	CPPC	L	L	W	E	S						C	D	S	F	T	N	C	W	E	L	L	T	CPPC	1	9.49659e-06
628	CPPC	L	F	W	K	E						C	D	S	F	T	N	C	W	E	L	L	T	CPPC	1	9.49659e-06
629	CPPC	L	M	W	R	E						C	D	S	F	T	N	C	W	E	L	L	T	CPPC	1	9.49659e-06
630	CPPC	L	H	E	W	F						C	D	S	F	T	N	C	W	E	L	L	T	CPPC	1	9.49659e-06
631	CPPC	L	R	E	V	G						C	D	S	F	T	N	C	W	E	L	L	T	CPPC	1	9.49659e-06
632	CPPC	L	R	L	T	E						C	D	S	F	T	N	C	W	E	L	L	T	CPPC	1	9.49659e-06
633	CPPC	L	R	H	Q	E						C	D	S	F	T	N	C	W	E	L	L	T	CPPC	1	9.49659e-06
634	CPPC	L	R	W	S	E						C	D	S	F	T	N	C	W	E	L	L	T	CPPC	1	9.49659e-06
635	CPPC	L	L	E	R	W						C	D	S	F	T	N	C	W	E	L	L	T	CPPC	1	9.49659e-06
636	CPPC	L	L	W	E	R						C	D	S	F	T	N	C	W	E	L	L	T	CPPC	1	9.49659e-06
637	CPPC	L	E	T	E	L	V	V	R	I	E	C	D	S	F	T	N	C	W	E	L	L	T	CPPC	1	9.49659e-06
638	CPPC	L	Y	S	E	L						C	D	S	F	T	N	C	W	E	L	L	T	CPPC	1	9.49659e-06
639	CPPC	E	R	L	E	A						C	D	S	F	T	N	C	W	E	L	L	T	CPPC	1	9.49659e-06
640	CPPC	E	L	E	R	W						C	D	S	F	T	N	C	W	E	L	L	T	CPPC	1	9.49659e-06
641	CPPC	E	F	P	P	V	L	L	S	W	G	C	D	S	F	T	N	C	W	E	L	L	T	CPPC	1	9.49659e-06
642	CPPC	D	N	R	L	L	L	L	V	R	E	C	D	S	F	T	N	C	W	E	L	L	T	CPPC	1	9.49659e-06
643	CPPC	D	L	L	W	L	E					C	D	S	F	T	N	C	W	E	L	L	T	CPPC	1	9.49659e-06
644	CPPC	A	T	R	R	W						C	D	S	F	T	N	C	W	E	L	L	T	CPPC	1	9.49659e-06
645	CPPC	A	R	P	A	T	E	P	R	G	L	C	D	S	F	T	N	C	W	E	L	L	T	CPPC	1	9.49659e-06
646	CPPC	A	R	E	H	E	L	V	A	V	P	C	D	S	F	T	N	C	W	E	L	L	T	CPPC	1	9.49659e-06
647	CPPC	A	R	S	R	E	L	T	L	E		C	D	S	F	T	N	C	W	E	L	L	T	CPPC	1	9.49659e-06
648	CPPC	A	R	W	R	S						C	D	S	F	T	N	C	W	E	L	L	T	CPPC	1	9.49659e-06
649	CPPC	A	H	K	E	L	L	V	V	V	P	C	D	S	F	T	N	C	W	E	L	L	T	CPPC	1	9.49659e-06
650	CPPC	A	R	W	E	W						C	D	S	F	T	N	C	W	E	L	L	T	CPPC	1	9.49659e-06
651	CPPC	A	R	W	L	S	R					C	D	S	F	T	N	C	W	E	L	L	T	CPPC	1	9.49659e-06
652	CPPC	A	S	H	R	F	R	L	W	E	F	C	D	S	F	T	N	C	W	E	L	L	T	CPPC	1	9.49659e-06
653	CPPC	A	W	V	T	K	E					C	D	S	F	T	N	C	W	E	L	L	T	CPPC	1	9.49659e-06
654	CPPC	A	L	M	V	I	E					C	D	S	F	T	N	C	W	E	L	L	T	CPPC	1	9.49659e-06
655	CPPC	A	M	P	V	P	E	W	L	V		C	D	S	F	T	N	C	W	E	L	L	T	CPPC	1	9.49659e-06
656	CPPC	A	P	R	L	S	W	V	I	I	E	C	D	S	F	T	N	C	W	E	L	L	T	CPPC	1	9.49659e-06
657	CPPC	A	L	D	V	E	L	W	Y	R	P	C	D	S	F	T	N	C	W	E	L	L	T	CPPC	1	9.49659e-06
658	CPPC	A	L	A	N	M	V	K	R	E	E	C	D	S	F	T	N	C	W	E	L	L	T	CPPC	1	9.49659e-06
659	CPPC	A	G	A	G	S	E	W	W	W	Q	C	D	S	F	T	N	C	W	E	L	L	T	CPPC	1	9.49659e-06
660	CPPC	A	E	W	S	F						C	D	S	F	T	N	C	W	E	L	L	T	CPPC	1	9.49659e-06
661	CPPC	A	E	W	R	E						C	D	S	F	T	N	C	W	E	L	L	T	CPPC	1	9.49659e-06
662	CPPC	A	E	F	R	H						C	D	S	F	T	N	C	W	E	L	L	T	CPPC	1	9.49659e-06
663	CPPC	A	S	E	W	L	G	M	W	G	I	C	D	S	F	T	N	C	W	E	L	L	T	CPPC	1	9.49659e-06
664	CPPC	A	S	F	G	E	F	L	V	R	P	C	D	S	F	T	N	C	W	E	L	L	T	CPPC	1	9.49659e-06
665	CPPC	A	L	V	V	R	E					C	D	S	F	T	N	C	W	E	L	L	T	CPPC	1	9.49659e-06
666	CPPC	G	K	E	G	A	W	W	V	I	P	C	D	S	F	T	N	C	W	E	L	L	T	CPPC	1	9.49659e-06
667	CPPC	G	P	S	E	S	V	Q	A	E	V	C	D	S	F	T	N	C	W	E	L	L	T	CPPC	1	9.49659e-06
668	CPPC	G	R	R	P	N	L	V	V	R	A	C	D	S	F	T	N	C	W	E	L	L	T	CPPC	1	9.49659e-06
669	CPPC	G	L	L	V	R	E					C	D	S	F	T	N	C	W	E	L	L	T	CPPC	1	9.49659e-06
670	CPPC	G	E	W	Q	Y						C	D	S	F	T	N	C	W	E	L	L	T	CPPC	1	9.49659e-06
671	CPPC	G	S	E	G	E	F	Y	V	K	E	C	D	S	F	T	N	C	W	E	L	L	T	CPPC	1	9.49659e-06
672	CPPC	G	S	V	G	E	L	Y	V	K	E	C	D	S	F	T	N	C	W	E	L	L	T	CPPC	1	9.49659e-06
673	CPPC	G	S	V	G	E	F	Y	V	N	E	C	D	S	F	T	N	C	W	E	L	L	T	CPPC	1	9.49659e-06
674	CPPC	G	S	V	G	E	F	Y	V	M	E	C	D	S	F	T	N	C	W	E	L	L	T	CPPC	1	9.49659e-06
675	CPPC	G	L	V	G	E	F	Y	V	K	E	C	D	S	F	T	N	C	W	E	L	L	T	CPPC	1	9.49659e-06
676	CPPC	G	F	E	R	T						C	D	S	F	T	N	C	W	E	L	L	T	CPPC	1	9.49659e-06
677	CPPC	G	T	A	T	E	W	I	V	E	P	C	D	S	F	T	N	C	W	E	L	L	T	CPPC	1	9.49659e-06
678	CPPC	G	T	A	T	E	L	I	V	Q	P	C	D	S	F	T	N	C	W	E	L	L	T	CPPC	1	9.49659e-06
679	CPPC	G	T	A	M	E	W	I	V	Q	P	C	D	S	F	T	N	C	W	E	L	L	T	CPPC	1	9.49659e-06
680	CPPC	G	I	E	S	T	T	W	L	V		C	D	S	F	T	N	C	W	E	L	L	T	CPPC	1	9.49659e-06
681	CPPC	G	P	G	W	L	W	I	A	R	E	C	D	S	F	T	N	C	W	E	L	L	T	CPPC	1	9.49659e-06
682	CPPC	G	R	E	P	A	L	I	V	R	S	C	D	S	F	T	N	C	W	E	L	L	T	CPPC	1	9.49659e-06
683	CPPC	G	R	F	E	W						C	D	S	F	T	N	C	W	E	L	L	T	CPPC	1	9.49659e-06
684	CPPC	G	L	H	W	S	W	R	L	E		C	D	S	F	T	N	C	W	E	L	L	T	CPPC	1	9.49659e-06
685	CPPC	G	E	Y	G	W						C	D	S	F	T	N	C	W	E	L	L	T	CPPC	1	9.49659e-06
686	CPPC	G	E	W	V	W						C	D	S	F	T	N	C	W	E	L	L	T	CPPC	1	9.49659e-06
687	CPPC	G	E	L	G	E	W	L	V	V	P	C	D	S	F	T	N	C	W	E	L	L	T	CPPC	1	9.49659e-06
688	CPPC	V	S	W	E	W						C	D	S	F	T	N	C	W	E	L	L	T	CPPC	1	9.49659e-06
689	CPPC	V	M	L	V	E	P	S	T	G		C	D	S	F	T	N	C	W	E	L	L	T	CPPC	1	9.49659e-06
690	CPPC	V	M	F	S	V	S	F	R	E		C	D	S	F	T	N	C	W	E	L	L	T	CPPC	1	9.49659e-06
691	CPPC	V	H	L	K	E						C	D	S	F	T	N	C	W	E	L	L	T	CPPC	1	9.49659e-06
692	CPPC	V	A	F	Q	E						C	D	S	F	T	N	C	W	E	L	L	T	CPPC	1	9.49659e-06
693	CPPC	V	E	Y	H	Y						C	D	S	F	T	N	C	W	E	L	L	T	CPPC	1	9.49659e-06
694	CPPC	V	E	S	K	V	T	V	V	R	R	C	D	S	F	T	N	C	W	E	L	L	T	CPPC	1	9.49659e-06
695	CPPC	V	E	W	R	S						C	D	S	F	T	N	C	W	E	L	L	T	CPPC	1	9.49659e-06
696	CPPC	V	E	W	A	F						C	D	S	F	T	N	C	W	E	L	L	T	CPPC	1	9.49659e-06
697	CPPC	V	E	W	G	W						C	D	S	F	T	N	C	W	E	L	L	T	CPPC	1	9.49659e-06
698	CPPC	V	L	W	A	E						C	D	S	F	T	N	C	W	E	L	L	T	CPPC	1	9.49659e-06
699	CPPC	V	T	Y	W	E	W	S	Y	N		C	D	S	F	T	N	C	W	E	L	L	T	CPPC	1	9.49659e-06
700	CPPC	V	R	M	E	W						C	D	S	F	T	N	C	W	E	L	L	T	CPPC	1	9.49659e-06
701	CPPC	V	L	H	E	W	M	W				C	D	S	F	T	N	C	W	E	L	L	T	CPPC	1	9.49659e-06
702	CPPC	V	L	I	G	E						C	D	S	F	T	N	C	W	E	L	L	T	CPPC	1	9.49659e-06
703	CPPC	V	G	W	E	F						C	D	S	F	T	N	C	W	E	L	L	T	CPPC	1	9.49659e-06
704	CPPC	V	E	P	V	Y	Q	L	E	W		C	D	S	F	T	N	C	W	E	L	L	T	CPPC	1	9.49659e-06
705	CPPC	V	E	Y	G	V						C	D	S	F	T	N	C	W	E	L	L	T	CPPC	1	9.49659e-06
706	CPPC	V	E	W	L	V						C	D	S	F	T	N	C	W	E	L	L	T	CPPC	1	9.49659e-06
707	CPPC	V	Y	E	G	G						C	D	S	F	T	N	C	W	E	L	L	T	CPPC	1	9.49659e-06
708	CPPC	E	K	E	Y	R	F					C	D	S	F	T	N	C	W	E	L	L	T	CPPC	1	9.49659e-06
709	CPPC	E	Q	V	T	S	R	W	R	W		C	D	S	F	T	N	C	W	E	L	L	T	CPPC	1	9.49659e-06
710	CPPC	E	Q	W	W	Y						C	D	S	F	T	N	C	W	E	L	L	T	CPPC	1	9.49659e-06
711	CPPC	E	H	R	E	I	W	L	L	F	P	C	D	S	F	T	N	C	W	E	L	L	T	CPPC	1	9.49659e-06
712	CPPC	E	H	L	W	G						C	D	S	F	T	N	C	W	E	L	L	T	CPPC	1	9.49659e-06
713	CPPC	E	H	V	S	W						C	D	S	F	T	N	C	W	E	L	L	T	CPPC	1	9.49659e-06
714	CPPC	E	R	D	L	S	W	W	R	F		C	D	S	F	T	N	C	W	E	L	L	T	CPPC	1	9.49659e-06
715	CPPC	E	R	A	A	W						C	D	S	F	T	N	C	W	E	L	L	T	CPPC	1	9.49659e-06
716	CPPC	E	R	V	R	Y						C	D	S	F	T	N	C	W	E	L	L	T	CPPC	1	9.49659e-06
717	CPPC	E	R	E	H	E	L	V	A	V	P	C	D	S	F	T	N	C	W	E	L	L	T	CPPC	1	9.49659e-06
718	CPPC	E	R	W	M	W						C	D	S	F	T	N	C	W	E	L	L	T	CPPC	1	9.49659e-06
719	CPPC	E	R	W	R	G						C	D	S	F	T	N	C	W	E	L	L	T	CPPC	1	9.49659e-06
720	CPPC	E	R	W	R	W						C	D	S	F	T	N	C	W	E	L	L	T	CPPC	1	9.49659e-06
721	CPPC	E	R	W	R	H						C	D	S	F	T	N	C	W	E	L	L	T	CPPC	1	9.49659e-06
722	CPPC	E	R	W	R	L						C	D	S	F	T	N	C	W	E	L	L	T	CPPC	1	9.49659e-06
723	CPPC	E	R	W	A	S						C	D	S	F	T	N	C	W	E	L	L	T	CPPC	1	9.49659e-06
724	CPPC	E	R	W	G	V						C	D	S	F	T	N	C	W	E	L	L	T	CPPC	1	9.49659e-06
725	CPPC	E	R	W	V	W						C	D	S	F	T	N	C	W	E	L	L	T	CPPC	1	9.49659e-06
726	CPPC	E	R	W	V	K	W					C	D	S	F	T	N	C	W	E	L	L	T	CPPC	1	9.49659e-06
727	CPPC	E	R	W	R	M						C	D	S	F	T	N	C	W	E	L	L	T	CPPC	1	9.49659e-06
728	CPPC	E	R	W	L	I	P	G	P	W	W	C	D	S	F	T	N	C	W	E	L	L	T	CPPC	1	9.49659e-06
729	CPPC	E	R	W	G	T						C	D	S	F	T	N	C	W	E	L	L	T	CPPC	1	9.49659e-06
730	CPPC	E	R	W	G	W						C	D	S	F	T	N	C	W	E	L	L	T	CPPC	1	9.49659e-06
731	CPPC	E	R	W	W	G						C	D	S	F	T	N	C	W	E	L	L	T	CPPC	1	9.49659e-06
732	CPPC	E	L	L	Y	H	E					C	D	S	F	T	N	C	W	E	L	L	T	CPPC	1	9.49659e-06
733	CPPC	E	L	L	V	E	R					C	D	S	F	T	N	C	W	E	L	L	T	CPPC	1	9.49659e-06
734	CPPC	E	A	R	R	W						C	D	S	F	T	N	C	W	E	L	L	T	CPPC	1	9.49659e-06
735	CPPC	E	A	L	Y	S	L	M				C	D	S	F	T	N	C	W	E	L	L	T	CPPC	1	9.49659e-06
736	CPPC	E	A	L	R	Q	W	L	V	K	T	C	D	S	F	T	N	C	W	E	L	L	T	CPPC	1	9.49659e-06
737	CPPC	E	G	A	A	R	E	F				C	D	S	F	T	N	C	W	E	L	L	T	CPPC	1	9.49659e-06
738	CPPC	E	V	Q	Y	E	M	H	W	M	T	C	D	S	F	T	N	C	W	E	L	L	T	CPPC	1	9.49659e-06
739	CPPC	E	E	F	W	L						C	D	S	F	T	N	C	W	E	L	L	T	CPPC	1	9.49659e-06
740	CPPC	E	Y	H	F	S						C	D	S	F	T	N	C	W	E	L	L	T	CPPC	1	9.49659e-06
741	CPPC	E	Y	R	W	G						C	D	S	F	T	N	C	W	E	L	L	T	CPPC	1	9.49659e-06
742	CPPC	E	Y	G	R	W						C	D	S	F	T	N	C	W	E	L	L	T	CPPC	1	9.49659e-06
743	CPPC	E	Y	S	S	W						C	D	S	F	T	N	C	W	E	L	L	T	CPPC	1	9.49659e-06
744	CPPC	E	Y	S	H	R						C	D	S	F	T	N	C	W	E	L	L	T	CPPC	1	9.49659e-06
745	CPPC	E	Y	W	S	Y						C	D	S	F	T	N	C	W	E	L	L	T	CPPC	1	9.49659e-06
746	CPPC	E	S	F	Q	W						C	D	S	F	T	N	C	W	E	L	L	T	CPPC	1	9.49659e-06
747	CPPC	E	S	F	G	M						C	D	S	F	T	N	C	W	E	L	L	T	CPPC	1	9.49659e-06
748	CPPC	E	S	V	R	V	W	R	V	E	V	C	D	S	F	T	N	C	W	E	L	L	T	CPPC	1	9.49659e-06
749	CPPC	E	S	S	K	W						C	D	S	F	T	N	C	W	E	L	L	T	CPPC	1	9.49659e-06
750	CPPC	E	S	W	T	G						C	D	S	F	T	N	C	W	E	L	L	T	CPPC	1	9.49659e-06
751	CPPC	E	S	W	Q	W						C	D	S	F	T	N	C	W	E	L	L	T	CPPC	1	9.49659e-06
752	CPPC	E	S	W	S	F						C	D	S	F	T	N	C	W	E	L	L	T	CPPC	1	9.49659e-06
753	CPPC	E	W	T	G	W						C	D	S	F	T	N	C	W	E	L	L	T	CPPC	1	9.49659e-06
754	CPPC	E	W	R	L	S	T	H	L	H	S	C	D	S	F	T	N	C	W	E	L	L	T	CPPC	1	9.49659e-06
755	CPPC	E	W	R	W	G						C	D	S	F	T	N	C	W	E	L	L	T	CPPC	1	9.49659e-06
756	CPPC	E	W	L	V	K	A					C	D	S	F	T	N	C	W	E	L	L	T	CPPC	1	9.49659e-06
757	CPPC	E	W	L	R	S						C	D	S	F	T	N	C	W	E	L	L	T	CPPC	1	9.49659e-06
758	CPPC	E	W	G	W	W						C	D	S	F	T	N	C	W	E	L	L	T	CPPC	1	9.49659e-06
759	CPPC	E	W	V	G	F						C	D	S	F	T	N	C	W	E	L	L	T	CPPC	1	9.49659e-06
760	CPPC	E	W	V	H	S	G	W	R	I		C	D	S	F	T	N	C	W	E	L	L	T	CPPC	1	9.49659e-06
761	CPPC	E	W	E	G	W						C	D	S	F	T	N	C	W	E	L	L	T	CPPC	1	9.49659e-06
762	CPPC	E	W	Y	M	M						C	D	S	F	T	N	C	W	E	L	L	T	CPPC	1	9.49659e-06
763	CPPC	E	W	W	R	V						C	D	S	F	T	N	C	W	E	L	L	T	CPPC	1	9.49659e-06
764	CPPC	E	W	W	E	F						C	D	S	F	T	N	C	W	E	L	L	T	CPPC	1	9.49659e-06
765	CPPC	E	W	L	G	G						C	D	S	F	T	N	C	W	E	L	L	T	CPPC	1	9.49659e-06
766	CPPC	E	W	L	F	L	W	W	T	H		C	D	S	F	T	N	C	W	E	L	L	T	CPPC	1	9.49659e-06
767	CPPC	E	W	F	R	T						C	D	S	F	T	N	C	W	E	L	L	T	CPPC	1	9.49659e-06
768	CPPC	E	W	F	R	S						C	D	S	F	T	N	C	W	E	L	L	T	CPPC	1	9.49659e-06
769	CPPC	E	F	R	V	R	P					C	D	S	F	T	N	C	W	E	L	L	T	CPPC	1	9.49659e-06
770	CPPC	E	L	S	R	V						C	D	S	F	T	N	C	W	E	L	L	T	CPPC	1	9.49659e-06
771	CPPC	E	L	W	S	W						C	D	S	F	T	N	C	W	E	L	L	T	CPPC	1	9.49659e-06
772	CPPC	E	L	L	V	R	A					C	D	S	F	T	N	C	W	E	L	L	T	CPPC	1	9.49659e-06
773	CPPC	E	F	S	V	T	F	P	W	R	W	C	D	S	F	T	N	C	W	E	L	L	T	CPPC	1	9.49659e-06
774	CPPC	E	F	S	V	P	F	P	W	R	W	C	D	S	F	T	N	C	W	E	L	L	T	CPPC	1	9.49659e-06
775	CPPC	E	F	M	I	S	Q					C	D	S	F	T	N	C	W	E	L	L	T	CPPC	1	9.49659e-06
776	CPPC	E	F	M	Y	R	Q					C	D	S	F	T	N	C	W	E	L	L	T	CPPC	1	9.49659e-06
777	CPPC	E	F	Y	H	R	K					C	D	S	F	T	N	C	W	E	L	L	T	CPPC	1	9.49659e-06
778	CPPC	E	F	Y	L	M	K					C	D	S	F	T	N	C	W	E	L	L	T	CPPC	1	9.49659e-06
779	CPPC	E	F	W	R	Q						C	D	S	F	T	N	C	W	E	L	L	T	CPPC	1	9.49659e-06
780	CPPC	E	F	W	R	W						C	D	S	F	T	N	C	W	E	L	L	T	CPPC	1	9.49659e-06
781	CPPC	Y	R	V	R	G						C	D	S	F	T	N	C	W	E	L	L	T	CPPC	1	9.49659e-06
782	CPPC	Y	R	E	G	V						C	D	S	F	T	N	C	W	E	L	L	T	CPPC	1	9.49659e-06
783	CPPC	Y	R	W	E	Y						C	D	S	F	T	N	C	W	E	L	L	T	CPPC	1	9.49659e-06
784	CPPC	Y	R	V	E	P						C	D	S	F	T	N	C	W	E	L	L	T	CPPC	1	9.49659e-06
785	CPPC	Y	G	V	E	Y						C	D	S	F	T	N	C	W	E	L	L	T	CPPC	1	9.49659e-06
786	CPPC	Y	E	V	I	P						C	D	S	F	T	N	C	W	E	L	L	T	CPPC	1	9.49659e-06
787	CPPC	Y	E	Y	S	A						C	D	S	F	T	N	C	W	E	L	L	T	CPPC	1	9.49659e-06
788	CPPC	Y	E	W	L	Y						C	D	S	F	T	N	C	W	E	L	L	T	CPPC	1	9.49659e-06
789	CPPC	S	K	W	G	E						C	D	S	F	T	N	C	W	E	L	L	T	CPPC	1	9.49659e-06
790	CPPC	S	T	R	L	E	F	W	A	R	A	C	D	S	F	T	N	C	W	E	L	L	T	CPPC	1	9.49659e-06
791	CPPC	S	T	F	W	L	P	L	M	G	E	C	D	S	F	T	N	C	W	E	L	L	T	CPPC	1	9.49659e-06
792	CPPC	S	R	T	E	T	W	I	A	F	P	C	D	S	F	T	N	C	W	E	L	L	T	CPPC	1	9.49659e-06
793	CPPC	S	S	E	W	V	W	I	A	S		C	D	S	F	T	N	C	W	E	L	L	T	CPPC	1	9.49659e-06
794	CPPC	S	I	Q	Y	R	E					C	D	S	F	T	N	C	W	E	L	L	T	CPPC	1	9.49659e-06
795	CPPC	S	Q	T	Q	Q	L	V	V	R	E	C	D	S	F	T	N	C	W	E	L	L	T	CPPC	1	9.49659e-06
796	CPPC	S	H	R	L	S	W	K	W	F		C	D	S	F	T	N	C	W	E	L	L	T	CPPC	1	9.49659e-06
797	CPPC	S	H	W	R	E						C	D	S	F	T	N	C	W	E	L	L	T	CPPC	1	9.49659e-06
798	CPPC	S	L	L	W	E	W					C	D	S	F	T	N	C	W	E	L	L	T	CPPC	1	9.49659e-06
799	CPPC	S	E	Q	W	L	W	H	W	R		C	D	S	F	T	N	C	W	E	L	L	T	CPPC	1	9.49659e-06
800	CPPC	S	E	W	M	W						C	D	S	F	T	N	C	W	E	L	L	T	CPPC	1	9.49659e-06
801	CPPC	S	Y	S	H	W						C	D	S	F	T	N	C	W	E	L	L	T	CPPC	1	9.49659e-06
802	CPPC	S	F	R	Y	R	E					C	D	S	F	T	N	C	W	E	L	L	T	CPPC	1	9.49659e-06
803	CPPC	S	F	F	E	W						C	D	S	F	T	N	C	W	E	L	L	T	CPPC	1	9.49659e-06
804	CPPC	S	H	G	Q	E	L	W	M	R	P	C	D	S	F	T	N	C	W	E	L	L	T	CPPC	1	9.49659e-06
805	CPPC	S	R	E	G	P	W	W	V	I	P	C	D	S	F	T	N	C	W	E	L	L	T	CPPC	1	9.49659e-06
806	CPPC	S	R	V	G	R						C	D	S	F	T	N	C	W	E	L	L	T	CPPC	1	9.49659e-06
807	CPPC	S	L	E	G	A	W	W	V	I	P	C	D	S	F	T	N	C	W	E	L	L	T	CPPC	1	9.49659e-06
808	CPPC	S	G	F	G	E	W	W	W	R	Y	C	D	S	F	T	N	C	W	E	L	L	T	CPPC	1	9.49659e-06
809	CPPC	S	V	P	L	P	E	F	W	P	W	C	D	S	F	T	N	C	W	E	L	L	T	CPPC	1	9.49659e-06
810	CPPC	S	V	R	R	G						C	D	S	F	T	N	C	W	E	L	L	T	CPPC	1	9.49659e-06
811	CPPC	S	E	R	W	L						C	D	S	F	T	N	C	W	E	L	L	T	CPPC	1	9.49659e-06
812	CPPC	S	E	L	R	V	I	W	L	Q		C	D	S	F	T	N	C	W	E	L	L	T	CPPC	1	9.49659e-06
813	CPPC	S	E	Y	K	F						C	D	S	F	T	N	C	W	E	L	L	T	CPPC	1	9.49659e-06
814	CPPC	S	E	F	G	W						C	D	S	F	T	N	C	W	E	L	L	T	CPPC	1	9.49659e-06
815	CPPC	S	Y	W	E	W						C	D	S	F	T	N	C	W	E	L	L	T	CPPC	1	9.49659e-06
816	CPPC	S	S	E	G	A	W	Q	I	R	E	C	D	S	F	T	N	C	W	E	L	L	T	CPPC	1	9.49659e-06
817	CPPC	S	W	I	L	E	P					C	D	S	F	T	N	C	W	E	L	L	T	CPPC	1	9.49659e-06
818	CPPC	S	W	L	G	T	S	E	W	W	V	C	D	S	F	T	N	C	W	E	L	L	T	CPPC	1	9.49659e-06
819	CPPC	S	W	E	V	R	R					C	D	S	F	T	N	C	W	E	L	L	T	CPPC	1	9.49659e-06
820	CPPC	S	W	Y	V	R	E					C	D	S	F	T	N	C	W	E	L	L	T	CPPC	1	9.49659e-06
821	CPPC	S	W	W	G	E						C	D	S	F	T	N	C	W	E	L	L	T	CPPC	1	9.49659e-06
822	CPPC	S	F	L	E	W	W	L	G	L		C	D	S	F	T	N	C	W	E	L	L	T	CPPC	1	9.49659e-06
823	CPPC	S	F	L	V	R	E					C	D	S	F	T	N	C	W	E	L	L	T	CPPC	1	9.49659e-06
824	CPPC	W	K	A	V	E	S	V	L	A	W	C	D	S	F	T	N	C	W	E	L	L	T	CPPC	1	9.49659e-06
825	CPPC	W	R	P	R	L	A	R	P	I		C	D	S	F	T	N	C	W	E	L	L	T	CPPC	1	9.49659e-06
826	CPPC	W	S	W	R	E						C	D	S	F	T	N	C	W	E	L	L	T	CPPC	2	1.89932e-05
827	CPPC	W	M	V	E	P						C	D	S	F	T	N	C	W	E	L	L	T	CPPC	1	9.49659e-06
828	CPPC	W	I	R	F	W	E					C	D	S	F	T	N	C	W	E	L	L	T	CPPC	1	9.49659e-06
829	CPPC	W	I	V	R	P						C	D	S	F	T	N	C	W	E	L	L	T	CPPC	1	9.49659e-06
830	CPPC	W	H	W	E	R						C	D	S	F	T	N	C	W	E	L	L	T	CPPC	1	9.49659e-06
831	CPPC	W	R	G	R	W						C	D	S	F	T	N	C	W	E	L	L	T	CPPC	1	9.49659e-06
832	CPPC	W	L	V	R	R						C	D	S	F	T	N	C	W	E	L	L	T	CPPC	1	9.49659e-06
833	CPPC	W	L	E	S	Y						C	D	S	F	T	N	C	W	E	L	L	T	CPPC	1	9.49659e-06
834	CPPC	W	G	W	E	W						C	D	S	F	T	N	C	W	E	L	L	T	CPPC	1	9.49659e-06
835	CPPC	W	E	W	M	W						C	D	S	F	T	N	C	W	E	L	L	T	CPPC	1	9.49659e-06
836	CPPC	W	Y	V	R	Y	R	A	G	L	I	C	D	S	F	T	N	C	W	E	L	L	T	CPPC	1	9.49659e-06
837	CPPC	W	S	L	H	F	R	I	G	W	E	C	D	S	F	T	N	C	W	E	L	L	T	CPPC	1	9.49659e-06
838	CPPC	W	W	W	G	E						C	D	S	F	T	N	C	W	E	L	L	T	CPPC	1	9.49659e-06
839	CPPC	W	L	W	E	S						C	D	S	F	T	N	C	W	E	L	L	T	CPPC	1	9.49659e-06
840	CPPC	W	F	F	L	R	P					C	D	S	F	T	N	C	W	E	L	L	T	CPPC	1	9.49659e-06
841	CPPC	L	Q	L	R	I						C	D	S	F	T	N	C	W	E	L	L	T	CPPC	1	9.49659e-06
842	CPPC	L	R	W	F	E						C	D	S	F	T	N	C	W	E	L	L	T	CPPC	1	9.49659e-06
843	CPPC	L	G	W	W	E						C	D	S	F	T	N	C	W	E	L	L	T	CPPC	1	9.49659e-06
844	CPPC	L	E	R	M	M	V	G	W	V	W	C	D	S	F	T	N	C	W	E	L	L	T	CPPC	1	9.49659e-06
845	CPPC	L	E	W	R	L						C	D	S	F	T	N	C	W	E	L	L	T	CPPC	1	9.49659e-06
846	CPPC	L	E	W	G	W						C	D	S	F	T	N	C	W	E	L	L	T	CPPC	1	9.49659e-06
847	CPPC	L	E	W	V	W						C	D	S	F	T	N	C	W	E	L	L	T	CPPC	1	9.49659e-06
848	CPPC	L	E	W	S	G						C	D	S	F	T	N	C	W	E	L	L	T	CPPC	1	9.49659e-06
849	CPPC	L	Y	L	E	L						C	D	S	F	T	N	C	W	E	L	L	T	CPPC	1	9.49659e-06
850	CPPC	L	W	E	R	F						C	D	S	F	T	N	C	W	E	L	L	T	CPPC	1	9.49659e-06
851	CPPC	F	T	V	E	P						C	D	S	F	T	N	C	W	E	L	L	T	CPPC	1	9.49659e-06
852	CPPC	F	R	L	R	P						C	D	S	F	T	N	C	W	E	L	L	T	CPPC	1	9.49659e-06
853	CPPC	F	I	E	G	P	I					C	D	S	F	T	N	C	W	E	L	L	T	CPPC	1	9.49659e-06
854	CPPC	F	Q	W	R	E						C	D	S	F	T	N	C	W	E	L	L	T	CPPC	1	9.49659e-06
855	CPPC	F	R	V	E	W						C	D	S	F	T	N	C	W	E	L	L	T	CPPC	1	9.49659e-06
856	CPPC	F	L	V	R	E						C	D	S	F	T	N	C	W	E	L	L	T	CPPC	1	9.49659e-06
857	CPPC	F	A	W	I	Y	E					C	D	S	F	T	N	C	W	E	L	L	T	CPPC	1	9.49659e-06
858	CPPC	F	E	V	R	P						C	D	S	F	T	N	C	W	E	L	L	T	CPPC	1	9.49659e-06
859	CPPC	F	E	S	V	W						C	D	S	F	T	N	C	W	E	L	L	T	CPPC	1	9.49659e-06
860	CPPC	F	E	W	K	S						C	D	S	F	T	N	C	W	E	L	L	T	CPPC	1	9.49659e-06
861	CPPC	F	E	W	Y	A						C	D	S	F	T	N	C	W	E	L	L	T	CPPC	1	9.49659e-06
862	CPPC	F	L	L	L	E						C	D	S	F	T	N	C	W	E	L	L	T	CPPC	1	9.49659e-06
863	CPPC	E	Q	Q	R	E	H	W	L	W		C	D	S	F	T	N	C	W	E	L	L	T	CPPC	1	9.49659e-06
