# Supplementary material for: Structure-guided design of CPPC-paired disulfide-rich peptide libraries for ligand and drug discovery
Source: Chem Sci. 2022 May 20;13(26):7780–9. doi: 10.1039/d2sc00924b (PMC9258321; doi:10.1039/d2sc00924b)
Supplement: SC-013-D2SC00924B-s006 [file SC-013-D2SC00924B-s006.xlsx]

## Sheet: Sheet1
Number	Sequence																								Abundance	Percentages
1	CPPC	P	R	E	H	E	L	V	A	V	P	C	E	G	L	N	N	C	W	F	V	E	A	CPPC	69676	0.523286
2	CPPC	P	R	E	H	E	L	V	A	V	P	C	A	F	E	S	N	C	W	E	I	K	R	CPPC	15863	0.119135
3	CPPC	P	R	E	H	E	L	V	A	V	P	C	P	T	R	P	N	C	Y	V	V	E	R	CPPC	4236	0.0318135
4	CPPC	P	R	E	H	E	L	V	A	V	P	C	A	E	R	S	N	C	W	I	V	R	K	CPPC	3032	0.0227711
5	CPPC	P	R	E	H	E	L	V	A	V	P	C	P	E	F	R	N	C	Y	I	V	K	R	CPPC	2942	0.0220952
6	CPPC	P	R	E	H	E	L	V	A	V	P	C	P	A	R	L	N	C	W	N	V	I	E	CPPC	2940	0.0220802
7	CPPC	P	R	E	H	E	L	V	A	V	P	C	S	K	V	Q	N	C	W	E	L	V	A	CPPC	2160	0.0162222
8	CPPC	P	R	E	H	E	L	V	A	V	P	C	R	A	R	L	N	C	W	R	V	I	E	CPPC	1863	0.0139916
9	CPPC	P	R	E	H	E	L	V	A	V	P	C	V	G	R	V	N	C	W	F	I	Q	E	CPPC	1533	0.0115132
10	CPPC	P	R	E	H	E	L	V	A	V	P	C	L	E	R	P	N	C	W	A	L	T	R	CPPC	1435	0.0107772
11	CPPC	P	R	E	H	E	L	V	A	V	P	C	G	R	E	P	N	C	W	M	V	R	R	CPPC	1424	0.0106946
12	CPPC	P	R	E	H	E	L	V	A	V	P	C	E	V	E	M	N	C	W	V	V	E	R	CPPC	1161	0.00871942
13	CPPC	P	R	E	H	E	L	V	A	V	P	C	L	S	R	A	N	C	W	W	I	E	R	CPPC	1113	0.00835893
14	CPPC	P	R	E	H	E	L	V	A	V	P	C	Q	T	V	R	N	C	W	H	I	M	E	CPPC	1081	0.0081186
15	CPPC	P	R	E	H	E	L	V	A	V	P	C	V	H	E	P	N	C	W	Y	I	A	R	CPPC	1022	0.0076755
16	CPPC	P	R	E	H	E	L	V	A	V	P	C	E	G	F	L	N	C	W	V	L	E	S	CPPC	980	0.00736006
17	CPPC	P	R	E	H	E	L	V	A	V	P	C	S	N	R	I	N	C	W	E	L	I	A	CPPC	900	0.00675924
18	CPPC	P	R	E	H	E	L	V	A	V	P	C	V	Q	R	D	N	C	W	E	I	L	E	CPPC	825	0.00619597
19	CPPC	P	R	E	H	E	L	V	A	V	P	C	G	G	M	A	N	C	W	R	V	V	E	CPPC	770	0.00578291
20	CPPC	P	R	E	H	E	L	V	A	V	P	C	E	R	R	I	N	C	W	S	I	E	A	CPPC	689	0.00517458
21	CPPC	P	R	E	H	E	L	V	A	V	P	C	H	N	L	A	N	C	W	H	L	R	E	CPPC	674	0.00506192
22	CPPC	P	R	E	H	E	L	V	A	V	P	C	P	F	R	K	N	C	W	S	L	E	K	CPPC	650	0.00488168
23	CPPC	P	R	E	H	E	L	V	A	V	P	C	E	E	V	V	N	C	W	E	I	V	R	CPPC	650	0.00488168
24	CPPC	P	R	E	H	E	L	V	A	V	P	C	A	G	V	A	N	C	W	A	V	R	E	CPPC	649	0.00487417
25	CPPC	P	R	E	H	E	L	V	A	V	P	C	E	G	R	R	N	C	W	A	I	Q	R	CPPC	625	0.00469392
26	CPPC	P	R	E	H	E	L	V	A	V	P	C	T	E	R	S	N	C	W	V	V	S	P	CPPC	580	0.00435596
27	CPPC	P	R	E	H	E	L	V	A	V	P	C	G	N	E	Q	N	C	W	E	I	K	A	CPPC	554	0.00416069
28	CPPC	P	R	E	H	E	L	V	A	V	P	C	Q	T	Q	R	N	C	W	T	I	T	E	CPPC	388	0.00291398
29	CPPC	P	R	E	H	E	L	V	A	V	P	C	R	L	T	P	N	C	W	K	V	M	E	CPPC	385	0.00289145
30	CPPC	P	R	E	H	E	L	V	A	V	P	C	V	A	L	Q	N	C	W	R	I	H	E	CPPC	376	0.00282386
31	CPPC	P	R	E	H	E	L	V	A	V	P	C	E	S	E	R	N	C	W	A	L	L	V	CPPC	348	0.00261357
32	CPPC	P	R	E	H	E	L	V	A	V	P	C	E	H	F	E	N	C	W	R	I	E	E	CPPC	330	0.00247839
33	CPPC	P	R	E	H	E	L	V	A	V	P	C	Q	R	E	P	N	C	Y	V	I	S	R	CPPC	323	0.00242582
34	CPPC	P	R	E	H	E	L	V	A	V	P	C	R	Q	R	D	N	C	W	W	V	S	E	CPPC	318	0.00238827
35	CPPC	P	R	E	H	E	L	V	A	V	P	C	E	F	R	N	N	C	F	M	V	L	A	CPPC	301	0.00226059
36	CPPC	P	R	E	H	E	L	V	A	V	P	C	A	G	E	T	N	C	W	F	I	V	R	CPPC	298	0.00223806
37	CPPC	P	R	E	H	E	L	V	A	V	P	C	H	A	E	Q	N	C	W	R	V	L	H	CPPC	238	0.00178744
38	CPPC	P	R	E	H	E	L	V	A	V	P	C	A	S	E	T	N	C	W	L	L	E	V	CPPC	234	0.0017574
39	CPPC	P	R	E	H	E	L	V	A	V	P	C	S	V	E	P	N	C	W	F	L	V	R	CPPC	232	0.00174238
40	CPPC	P	R	E	H	E	L	V	A	V	P	C	P	A	E	P	N	C	Y	L	V	L	A	CPPC	224	0.0016823
41	CPPC	P	R	E	H	E	L	V	A	V	P	C	D	S	F	T	N	C	W	E	L	L	T	CPPC	224	0.0016823
42	CPPC	P	R	E	H	E	L	V	A	V	P	C	E	Q	L	P	N	C	W	R	I	E	A	CPPC	215	0.00161471
43	CPPC	P	R	E	H	E	L	V	A	V	P	C	P	G	Q	E	N	C	W	K	V	E	H	CPPC	192	0.00144197
44	CPPC	P	R	E	H	E	L	V	A	V	P	C	D	G	V	P	N	C	W	E	L	R	K	CPPC	178	0.00133683
45	CPPC	P	R	E	H	E	L	V	A	V	P	C	E	D	L	L	N	C	W	K	V	E	A	CPPC	179	0.00134434
46	CPPC	P	R	E	H	E	L	V	A	V	P	C	Y	A	R	S	N	C	W	R	V	E	A	CPPC	168	0.00126173
47	CPPC	P	R	E	H	E	L	V	A	V	P	C	P	Y	G	V	E	C	W	M	I	V	V	CPPC	166	0.0012467
48	CPPC	P	R	E	H	E	L	V	A	V	P	C	R	A	E	L	N	C	W	E	L	V	F	CPPC	156	0.0011716
49	CPPC	P	R	E	H	E	L	V	A	V	P	C	P	A	R	E	N	C	W	A	L	E	P	CPPC	149	0.00111903
50	CPPC	P	R	E	H	E	L	V	A	V	P	C	G	S	T	R	N	C	W	V	I	Q	E	CPPC	148	0.00111152
51	CPPC	P	R	E	H	E	L	V	A	V	P	C	P	E	R	R	N	C	W	L	V	E	P	CPPC	146	0.0010965
52	CPPC	P	R	E	H	E	L	V	A	V	P	C	E	F	R	L	N	C	W	Y	L	Q	V	CPPC	143	0.00107397
53	CPPC	P	R	E	H	E	L	V	A	V	P	C	A	E	A	P	N	C	W	W	V	T	E	CPPC	135	0.00101389
54	CPPC	P	R	E	H	E	L	V	A	V	P	C	E	G	L	N	N	W	W	F	V	E	A	CPPC	134	0.00100638
55	CPPC	P	R	E	H	E	L	V	A	V	P	C	V	V	E	S	N	C	W	R	I	I	S	CPPC	133	0.000998866
56	CPPC	P	R	E	H	E	L	V	A	V	P	C	M	T	E	Q	N	C	W	R	L	M	T	CPPC	127	0.000953804
57	CPPC	P	R	E	H	E	L	V	A	V	P	C	G	G	I	L	N	C	W	T	I	T	E	CPPC	120	0.000901232
58	CPPC	P	R	E	H	E	L	V	A	V	P	C	E	F	R	S	N	C	Y	L	L	K	Y	CPPC	115	0.000863681
59	CPPC	P	R	E	H	E	L	V	A	V	P	C	D	A	L	P	N	C	W	E	L	V	W	CPPC	114	0.000856171
60	CPPC	P	R	E	H	E	L	V	A	V	P	C	N	S	V	R	N	C	W	F	V	R	E	CPPC	111	0.00083364
61	CPPC	P	R	E	H	E	L	V	A	V	P	C	T	S	E	H	N	C	W	L	L	I	S	CPPC	111	0.00083364
62	CPPC	P	R	E	H	E	L	V	A	V	P	C	P	N	L	G	N	C	*	E	I	R	L	CPPC	112	0.00084115
63	CPPC	P	R	E	H	E	L	V	A	V	P	C	M	G	T	S	N	C	W	E	L	I	A	CPPC	107	0.000803599
64	CPPC	P	R	E	H	E	L	V	A	V	P	C	A	E	V	S	N	C	W	L	V	S	E	CPPC	102	0.000766048
65	CPPC	P	R	E	H	E	L	V	A	V	P	C	V	S	H	S	N	C	W	E	L	I	S	CPPC	103	0.000773558
66	CPPC	P	R	E	H	E	L	V	A	V	P	C	P	F	V	Q	N	C	W	F	V	E	R	CPPC	99	0.000743517
67	CPPC	P	R	E	H	E	L	V	A	V	P	C	K	E	E	A	N	C	W	M	V	T	P	CPPC	97	0.000728496
68	CPPC	P	R	E	H	E	L	V	A	V	P	C	E	G	L	N	K	C	W	F	V	E	A	CPPC	102	0.000766048
69	CPPC	P	R	E	H	E	L	V	A	V	P	C	E	Q	T	R	N	C	W	Q	I	A	V	CPPC	94	0.000705965
70	CPPC	P	R	E	H	E	L	V	A	V	P	C	E	Q	N	I	N	C	W	H	V	T	V	CPPC	93	0.000698455
71	CPPC	P	R	E	H	E	L	V	A	V	P	C	E	G	L	N	N	C	W	V	V	E	A	CPPC	93	0.000698455
72	CPPC	P	R	E	H	E	L	V	A	V	P	C	E	S	R	L	N	C	W	S	V	H	Q	CPPC	91	0.000683435
73	CPPC	P	R	E	H	E	L	V	A	V	P	C	A	R	A	R	N	C	W	E	L	V	S	CPPC	88	0.000660904
74	CPPC	P	R	E	H	E	L	V	A	V	P	C	P	N	E	T	N	C	W	H	V	S	E	CPPC	76	0.000570781
75	CPPC	P	R	E	H	E	L	V	A	V	P	C	P	H	K	A	N	C	W	V	V	S	E	CPPC	72	0.000540739
76	CPPC	P	R	E	H	E	L	V	A	V	P	C	P	S	E	S	N	C	W	S	L	V	T	CPPC	68	0.000510698
77	CPPC	P	R	E	H	E	L	V	A	V	P	C	Y	S	R	E	N	C	W	T	I	S	E	CPPC	59	0.000443106
78	CPPC	P	R	E	H	E	L	V	A	V	P	C	E	H	M	V	N	C	W	L	I	R	K	CPPC	57	0.000428085
79	CPPC	P	R	E	H	E	L	V	A	V	P	C	F	A	N	T	E	C	W	M	V	V	I	CPPC	56	0.000420575
80	CPPC	P	R	E	H	E	L	V	A	V	P	C	H	F	A	R	N	C	W	R	L	E	E	CPPC	56	0.000420575
81	CPPC	P	R	E	H	E	L	V	A	V	P	C	P	W	E	E	N	C	Y	W	V	E	A	CPPC	55	0.000413065
82	CPPC	P	R	E	H	E	L	V	A	V	P	C	D	R	E	E	N	C	W	H	V	V	M	CPPC	54	0.000405555
83	CPPC	P	R	E	H	E	L	V	A	V	P	C	E	F	E	V	N	C	Y	K	V	V	V	CPPC	49	0.000368003
84	CPPC	P	R	E	H	E	L	V	A	V	P	C	G	L	A	R	N	C	W	V	I	S	E	CPPC	47	0.000352983
85	CPPC	P	R	E	H	E	L	V	A	V	P	C	R	D	M	L	N	C	W	Y	V	Y	E	CPPC	46	0.000345472
86	CPPC	P	R	E	H	E	L	V	A	V	P	C	Y	H	M	V	N	C	W	F	L	E	V	CPPC	46	0.000345472
87	CPPC	P	R	E	H	E	L	V	A	V	P	C	P	N	R	Q	N	C	W	R	I	E	L	CPPC	45	0.000337962
88	CPPC	P	R	E	H	E	L	V	A	V	P	C	L	T	V	A	N	C	W	Y	I	E	P	CPPC	42	0.000315431
89	CPPC	P	R	E	H	E	L	V	A	V	P	C	P	G	T	E	N	C	W	N	V	L	E	CPPC	41	0.000307921
90	CPPC	P	R	E	H	E	L	V	A	V	P	C	P	V	N	N	E	C	F	Y	V	I	I	CPPC	41	0.000307921
91	CPPC	P	R	E	H	E	L	V	A	V	P	C	V	S	E	V	G	C	P	K	Y	E	L	CPPC	41	0.000307921
92	CPPC	P	R	E	H	E	L	V	A	V	P	C	S	Y	E	L	N	C	W	S	V	H	H	CPPC	41	0.000307921
93	CPPC	P	R	E	H	E	L	V	A	V	P	C	P	L	R	G	N	C	W	E	L	R	Q	CPPC	40	0.000300411
94	CPPC	P	R	E	H	E	L	V	A	V	P	C	P	F	R	P	N	C	W	V	L	L	E	CPPC	41	0.000307921
95	CPPC	P	R	E	H	E	L	V	A	V	P	C	V	A	Y	A	N	C	W	L	V	E	R	CPPC	38	0.00028539
96	CPPC	P	R	E	H	E	L	V	A	V	P	C	S	R	E	P	N	C	W	S	I	L	Y	CPPC	39	0.000292901
97	CPPC	P	R	E	H	E	L	V	A	V	P	C	E	Y	K	I	N	C	W	M	V	I	I	CPPC	36	0.00027037
98	CPPC	P	R	E	H	E	L	V	A	V	P	C	S	E	Q	L	N	C	W	F	V	Y	V	CPPC	36	0.00027037
99	CPPC	P	R	E	H	E	L	V	A	V	P	C	E	E	A	I	N	C	W	S	I	V	E	CPPC	36	0.00027037
100	CPPC	P	R	E	H	E	L	V	A	V	P	C	E	G	L	N	T	C	W	F	V	E	A	CPPC	36	0.00027037
101	CPPC	P	R	E	H	E	L	V	A	V	P	C	E	G	L	H	N	C	W	F	V	E	A	CPPC	35	0.000262859
102	CPPC	P	R	E	H	E	L	V	A	V	P	C	I	A	E	R	N	C	W	S	V	H	H	CPPC	34	0.000255349
103	CPPC	P	R	E	H	E	L	V	A	V	P	C	P	N	G	A	E	C	W	L	L	I	I	CPPC	34	0.000255349
104	CPPC	P	R	E	H	E	L	V	A	V	P	C	S	G	V	R	N	C	W	N	V	R	D	CPPC	35	0.000262859
105	CPPC	P	R	E	H	E	L	V	A	V	P	C	P	F	T	R	N	C	W	R	I	Y	E	CPPC	34	0.000255349
106	CPPC	P	R	E	H	E	L	V	A	V	P	C	V	I	S	A	N	C	W	V	I	R	E	CPPC	32	0.000240329
107	CPPC	P	R	E	H	E	L	V	A	V	P	C	Y	E	R	Y	N	C	W	H	L	T	I	CPPC	31	0.000232818
108	CPPC	P	R	E	H	E	L	V	A	V	P	C	E	G	L	N	N	C	G	F	V	E	A	CPPC	30	0.000225308
109	CPPC	P	R	E	H	E	L	V	A	V	P	C	G	L	V	S	N	C	W	K	V	E	Q	CPPC	28	0.000210288
110	CPPC	P	R	E	H	E	L	V	A	V	P	C	E	S	L	M	N	C	W	H	L	T	V	CPPC	28	0.000210288
111	CPPC	P	R	E	H	E	L	V	A	V	P	C	W	L	G	M	M	C	S	V	L	V	Y	CPPC	28	0.000210288
112	CPPC	P	R	E	H	E	L	V	A	V	P	C	R	F	A	E	N	C	W	V	V	I	E	CPPC	27	0.000202777
113	CPPC	P	R	E	H	E	L	V	A	V	P	C	L	S	A	A	N	C	W	F	I	V	E	CPPC	27	0.000202777
114	CPPC	P	R	E	H	E	L	V	A	V	P	C	A	S	G	P	N	C	W	N	V	V	E	CPPC	27	0.000202777
115	CPPC	P	R	E	H	E	L	V	A	V	P	C	A	G	E	L	N	C	W	G	V	I	V	CPPC	26	0.000195267
116	CPPC	P	R	E	H	E	L	V	A	V	P	C	P	A	R	L	N	C	W	T	V	I	E	CPPC	25	0.000187757
117	CPPC	P	R	E	H	E	L	V	A	V	P	C	R	E	R	M	N	C	W	Y	L	E	R	CPPC	26	0.000195267
118	CPPC	P	R	E	H	E	L	V	A	V	P	C	L	W	R	L	N	C	W	L	V	E	S	CPPC	24	0.000180246
119	CPPC	P	R	E	H	E	L	V	A	V	P	C	S	G	L	N	N	C	W	F	V	E	A	CPPC	25	0.000187757
120	CPPC	P	R	E	H	E	L	V	A	V	P	C	A	A	R	T	N	C	W	E	L	Q	D	CPPC	23	0.000172736
121	CPPC	P	R	E	H	E	L	V	A	V	P	C	A	F	E	S	N	C	W	E	S	K	R	CPPC	23	0.000172736
122	CPPC	P	R	E	H	E	L	V	A	V	P	C	E	G	L	N	H	C	W	F	V	E	A	CPPC	23	0.000172736
123	CPPC	P	R	E	H	E	L	V	A	V	P	C	E	G	L	T	N	C	W	F	V	E	A	CPPC	23	0.000172736
124	CPPC	P	R	E	H	E	L	V	A	V	P	C	H	R	E	P	N	C	F	F	V	R	V	CPPC	22	0.000165226
125	CPPC	P	R	E	H	E	L	V	A	V	P	C	A	S	A	H	E	C	W	F	V	L	I	CPPC	22	0.000165226
126	CPPC	P	R	E	H	E	L	V	A	V	P	C	A	F	E	S	T	C	W	E	I	K	R	CPPC	22	0.000165226
127	CPPC	P	R	E	H	E	L	V	A	V	P	C	G	G	E	R	N	C	W	R	L	T	Y	CPPC	24	0.000180246
128	CPPC	P	R	E	H	E	L	V	A	V	P	C	H	T	G	L	N	C	W	V	V	E	R	CPPC	21	0.000157716
129	CPPC	P	R	E	H	E	L	V	A	V	P	C	N	A	G	V	E	C	F	L	V	I	V	CPPC	22	0.000165226
130	CPPC	P	R	E	H	E	L	V	A	V	P	C	P	M	D	L	E	C	W	F	V	S	N	CPPC	20	0.000150205
131	CPPC	P	R	E	H	E	L	V	A	V	P	C	R	M	E	V	N	C	W	K	L	E	F	CPPC	20	0.000150205
132	CPPC	P	R	E	H	E	L	V	A	V	P	C	A	G	V	V	N	C	*	N	V	T	V	CPPC	20	0.000150205
133	CPPC	P	R	E	H	E	L	V	A	V	P	C	S	F	L	D	N	C	W	L	V	E	T	CPPC	20	0.000150205
134	CPPC	P	R	E	H	E	L	V	A	V	P	C	R	A	F	S	N	C	W	E	I	E	E	CPPC	22	0.000165226
135	CPPC	P	R	E	H	E	L	V	A	V	P	C	V	T	K	K	N	C	W	E	L	R	Q	CPPC	19	0.000142695
136	CPPC	P	R	E	H	E	L	V	A	V	P	C	K	S	E	R	N	C	W	L	L	R	N	CPPC	18	0.000135185
137	CPPC	P	R	E	H	E	L	V	A	V	P	C	Q	G	L	N	N	C	W	F	V	E	A	CPPC	18	0.000135185
138	CPPC	P	R	E	H	E	L	V	A	V	P	C	P	N	S	G	E	C	W	A	L	V	W	CPPC	19	0.000142695
139	CPPC	P	R	E	H	E	L	V	A	V	P	C	G	M	S	P	N	C	W	V	V	R	E	CPPC	18	0.000135185
140	CPPC	P	R	E	H	E	L	V	A	V	P	C	G	E	R	D	N	C	W	Q	V	M	W	CPPC	18	0.000135185
141	CPPC	P	R	E	H	E	L	V	A	V	P	C	G	E	R	T	N	C	W	L	L	A	T	CPPC	18	0.000135185
142	CPPC	P	R	E	H	E	L	V	A	V	P	C	E	G	L	K	N	C	W	F	V	E	A	CPPC	19	0.000142695
143	CPPC	P	R	E	H	E	L	V	A	V	P	C	E	G	L	N	N	C	W	F	V	E	V	CPPC	18	0.000135185
144	CPPC	P	R	E	H	E	L	V	A	V	P	C	E	G	L	N	N	C	W	F	V	E	S	CPPC	18	0.000135185
145	CPPC	P	R	E	H	E	L	V	A	V	P	C	L	W	E	W	N	C	W	K	I	K	R	CPPC	18	0.000135185
146	CPPC	P	R	E	H	E	L	V	A	V	P	C	A	G	H	K	N	C	W	I	L	Y	E	CPPC	17	0.000127675
147	CPPC	P	R	E	H	E	L	V	A	V	P	C	T	G	T	S	N	C	W	L	L	E	Q	CPPC	16	0.000120164
148	CPPC	P	R	E	H	E	L	V	A	V	P	C	M	L	E	V	W	C	W	Y	L	L	R	CPPC	16	0.000120164
149	CPPC	P	R	E	H	E	L	V	A	V	P	C	P	M	K	T	N	C	F	E	V	I	R	CPPC	16	0.000120164
150	CPPC	P	R	E	H	E	L	V	A	V	P	C	A	F	E	S	K	C	W	E	I	K	R	CPPC	17	0.000127675
151	CPPC	P	R	E	H	E	L	V	A	V	P	C	V	A	D	R	A	C	E	R	E	R	P	CPPC	16	0.000120164
152	CPPC	P	R	E	H	E	L	V	A	V	P	C	E	R	A	P	N	C	W	Y	L	L	E	CPPC	16	0.000120164
153	CPPC	P	R	E	H	E	L	V	A	V	P	C	I	E	W	K	N	C	F	H	V	I	S	CPPC	15	0.000112654
154	CPPC	P	R	E	H	E	L	V	A	V	P	C	P	P	W	A	E	C	W	M	V	I	V	CPPC	15	0.000112654
155	CPPC	P	R	E	H	E	L	V	A	V	P	C	L	G	V	K	N	C	Y	N	V	M	E	CPPC	15	0.000112654
156	CPPC	P	R	E	H	E	L	V	A	V	P	C	A	E	R	S	K	C	W	I	V	R	K	CPPC	16	0.000120164
157	CPPC	P	R	E	H	E	L	V	A	V	P	C	E	G	L	N	N	C	W	F	V	Y	A	CPPC	17	0.000127675
158	CPPC	P	R	E	H	E	L	V	A	V	P	C	Y	G	L	N	N	C	W	F	V	E	A	CPPC	18	0.000135185
159	CPPC	P	R	E	H	E	L	V	A	V	P	C	S	N	W	Q	S	C	S	R	R	L	R	CPPC	15	0.000112654
160	CPPC	P	R	E	H	E	L	V	A	V	P	C	T	L	E	Q	N	C	Y	H	L	I	Y	CPPC	14	0.000105144
161	CPPC	P	R	E	H	E	L	V	A	V	P	C	Q	T	V	R	T	C	W	H	I	M	E	CPPC	14	0.000105144
162	CPPC	P	R	E	H	E	L	V	A	V	P	C	P	P	G	L	E	C	W	W	L	K	V	CPPC	14	0.000105144
163	CPPC	P	R	E	H	E	L	V	A	V	P	C	*	R	L	N	V	C	F	M	S	H	G	CPPC	14	0.000105144
164	CPPC	P	R	E	H	E	L	V	A	V	P	C	E	G	L	N	N	C	W	L	V	E	A	CPPC	22	0.000165226
165	CPPC	P	R	E	H	E	L	V	A	V	P	C	L	T	R	A	N	C	W	E	L	R	G	CPPC	14	0.000105144
166	CPPC	P	R	E	H	E	L	V	A	V	P	C	T	M	A	R	N	C	W	I	I	E	T	CPPC	13	9.76335e-05
167	CPPC	P	R	E	H	E	L	V	A	V	P	C	T	G	H	P	N	C	F	F	V	E	V	CPPC	13	9.76335e-05
168	CPPC	P	R	E	H	E	L	V	A	V	P	C	P	S	R	I	E	C	W	A	L	I	V	CPPC	13	9.76335e-05
169	CPPC	P	R	E	H	E	L	V	A	V	P	C	G	P	L	V	E	C	W	Y	V	L	V	CPPC	13	9.76335e-05
170	CPPC	P	R	E	H	E	L	V	A	V	P	C	V	E	R	M	P	C	K	A	N	T	L	CPPC	13	9.76335e-05
171	CPPC	P	R	E	H	E	L	V	A	V	P	C	*	D	F	L	V	C	T	W	L	L	L	CPPC	13	9.76335e-05
172	CPPC	P	R	E	H	E	L	V	A	V	P	C	E	G	F	N	N	C	W	F	V	E	A	CPPC	13	9.76335e-05
173	CPPC	P	R	E	H	E	L	V	A	V	P	C	P	P	R	P	N	C	Y	V	V	E	R	CPPC	12	9.01232e-05
174	CPPC	P	R	E	H	E	L	V	A	V	P	C	L	I	R	S	N	C	F	I	I	R	E	CPPC	12	9.01232e-05
175	CPPC	P	R	E	H	E	L	V	A	V	P	C	G	T	P	Y	E	C	F	L	V	I	V	CPPC	12	9.01232e-05
176	CPPC	P	R	E	H	E	L	V	A	V	P	C	V	G	R	G	N	C	W	F	I	Q	E	CPPC	12	9.01232e-05
177	CPPC	P	R	E	H	E	L	V	A	V	P	C	N	S	W	E	R	C	W	V	L	M	V	CPPC	13	9.76335e-05
178	CPPC	P	R	E	H	E	L	V	A	V	P	C	R	S	E	M	N	C	W	V	V	T	G	CPPC	11	8.2613e-05
179	CPPC	P	R	E	H	E	L	V	A	V	P	C	I	E	R	P	N	C	W	R	I	G	A	CPPC	11	8.2613e-05
180	CPPC	P	R	E	H	E	L	V	A	V	P	C	P	E	L	F	Q	C	F	Y	V	M	V	CPPC	11	8.2613e-05
181	CPPC	P	R	E	H	E	L	V	A	V	P	C	N	H	E	R	N	C	W	R	I	L	G	CPPC	10	7.51027e-05
182	CPPC	P	R	E	H	E	L	V	A	V	P	C	N	S	F	P	E	C	W	L	V	V	V	CPPC	10	7.51027e-05
183	CPPC	P	R	E	H	E	L	V	A	V	P	C	P	A	N	V	E	C	W	W	V	S	I	CPPC	11	8.2613e-05
184	CPPC	P	R	E	H	E	L	V	A	V	P	C	L	F	P	R	R	C	V	P	R	S	E	CPPC	10	7.51027e-05
185	CPPC	P	R	E	H	E	L	V	A	V	P	C	A	F	E	L	N	C	W	E	I	K	R	CPPC	10	7.51027e-05
186	CPPC	P	R	E	H	E	L	V	A	V	P	C	E	G	L	N	N	C	W	S	V	E	A	CPPC	10	7.51027e-05
187	CPPC	P	R	E	H	E	L	V	A	V	P	C	E	S	R	M	N	C	W	I	F	K	A	CPPC	10	7.51027e-05
188	CPPC	P	R	E	H	E	L	V	A	V	P	C	E	W	R	S	N	C	W	Q	V	I	I	CPPC	10	7.51027e-05
189	CPPC	P	R	E	H	E	L	V	A	V	P	C	Y	N	E	L	N	C	W	Y	V	V	R	CPPC	10	7.51027e-05
190	CPPC	P	R	E	H	E	L	V	A	V	P	C	T	L	R	E	N	C	W	A	L	V	Y	CPPC	9	6.75924e-05
191	CPPC	P	R	E	H	E	L	V	A	V	P	C	R	V	P	N	R	C	A	E	P	E	E	CPPC	9	6.75924e-05
192	CPPC	P	R	E	H	E	L	V	A	V	P	C	S	T	T	W	E	C	W	L	V	I	I	CPPC	9	6.75924e-05
193	CPPC	P	R	E	H	E	L	V	A	V	P	C	S	G	E	R	N	C	W	T	I	N	S	CPPC	9	6.75924e-05
194	CPPC	P	R	E	H	E	L	V	A	V	P	C	M	W	E	P	N	C	W	R	L	T	S	CPPC	9	6.75924e-05
195	CPPC	P	R	E	H	E	L	V	A	V	P	C	P	R	L	T	E	C	Y	V	V	V	V	CPPC	9	6.75924e-05
196	CPPC	P	R	E	H	E	L	V	A	V	P	C	P	R	F	G	N	C	W	V	V	Y	E	CPPC	9	6.75924e-05
197	CPPC	P	R	E	H	E	L	V	A	V	P	C	R	I	R	P	N	C	F	L	V	T	E	CPPC	9	6.75924e-05
198	CPPC	P	R	E	H	E	L	V	A	V	P	C	A	L	W	Q	N	C	W	L	I	H	E	CPPC	9	6.75924e-05
199	CPPC	P	R	E	H	E	L	V	A	V	P	C	E	G	L	N	N	C	W	F	V	K	A	CPPC	9	6.75924e-05
200	CPPC	P	R	E	H	E	L	V	A	V	P	C	E	V	L	N	N	C	W	F	V	E	A	CPPC	10	7.51027e-05
201	CPPC	P	R	E	H	E	L	V	A	V	P	C	Y	G	E	S	N	C	W	Y	I	T	S	CPPC	9	6.75924e-05
202	CPPC	P	R	E	H	E	L	V	A	V	P	C	S	E	R	R	N	C	W	I	L	I	A	CPPC	9	6.75924e-05
203	CPPC	P	R	E	H	E	L	V	A	V	P	C	S	E	R	S	N	C	W	L	L	R	I	CPPC	8	6.00822e-05
204	CPPC	P	R	E	H	E	L	V	A	V	P	C	P	E	F	R	T	C	Y	I	V	K	R	CPPC	8	6.00822e-05
205	CPPC	P	R	E	H	E	L	V	A	V	P	C	P	T	H	L	E	C	Y	M	V	F	V	CPPC	8	6.00822e-05
206	CPPC	P	R	E	H	E	L	V	A	V	P	C	V	E	R	P	N	C	W	V	M	H	R	CPPC	8	6.00822e-05
207	CPPC	P	R	E	H	E	L	V	A	V	P	C	V	F	E	S	N	C	W	E	I	K	R	CPPC	8	6.00822e-05
208	CPPC	P	R	E	H	E	L	V	A	V	P	C	E	D	V	E	N	C	W	E	L	V	I	CPPC	8	6.00822e-05
209	CPPC	P	R	E	H	E	L	V	A	V	P	C	E	G	L	I	N	C	W	F	V	E	A	CPPC	8	6.00822e-05
210	CPPC	P	R	E	H	E	L	V	A	V	P	C	W	G	L	N	N	C	W	F	V	E	A	CPPC	8	6.00822e-05
211	CPPC	P	R	E	H	E	L	V	A	V	P	C	S	E	V	N	H	C	T	K	V	L	K	CPPC	7	5.25719e-05
212	CPPC	P	R	E	H	E	L	V	A	V	P	C	Q	K	E	L	N	C	W	V	V	T	N	CPPC	7	5.25719e-05
213	CPPC	P	R	E	H	E	L	V	A	V	P	C	L	S	A	V	N	C	W	L	L	K	E	CPPC	7	5.25719e-05
214	CPPC	P	R	E	H	E	L	V	A	V	P	C	A	F	E	S	N	C	W	E	I	K	S	CPPC	9	6.75924e-05
215	CPPC	P	R	E	H	E	L	V	A	V	P	C	V	A	T	I	E	C	G	F	I	L	R	CPPC	7	5.25719e-05
216	CPPC	P	R	E	H	E	L	V	A	V	P	C	E	G	R	R	T	C	W	A	I	Q	R	CPPC	7	5.25719e-05
217	CPPC	P	R	E	H	E	L	V	A	V	P	C	E	G	L	N	N	C	W	E	I	K	R	CPPC	7	5.25719e-05
218	CPPC	P	R	E	H	E	L	V	A	V	P	C	S	K	V	Q	T	C	W	E	L	V	A	CPPC	7	5.25719e-05
219	CPPC	P	R	E	H	E	L	V	A	V	P	C	F	A	W	A	N	C	R	L	R	G	E	CPPC	7	5.25719e-05
220	CPPC	P	R	E	H	E	L	V	A	V	P	C	N	A	E	K	S	C	G	H	E	Y	S	CPPC	6	4.50616e-05
221	CPPC	P	R	E	H	E	L	V	A	V	P	C	Q	H	S	D	E	C	W	L	V	V	R	CPPC	6	4.50616e-05
222	CPPC	P	R	E	H	E	L	V	A	V	P	C	H	L	T	A	E	C	H	E	L	S	S	CPPC	6	4.50616e-05
223	CPPC	P	R	E	H	E	L	V	A	V	P	C	P	T	R	P	N	C	E	V	V	E	R	CPPC	6	4.50616e-05
224	CPPC	P	R	E	H	E	L	V	A	V	P	C	P	I	R	P	N	C	Y	V	V	E	R	CPPC	6	4.50616e-05
225	CPPC	P	R	E	H	E	L	V	A	V	P	C	R	G	E	V	N	C	F	V	V	I	P	CPPC	6	4.50616e-05
226	CPPC	P	R	E	H	E	L	V	A	V	P	C	R	K	N	R	Y	C	R	T	T	Y	E	CPPC	6	4.50616e-05
227	CPPC	P	R	E	H	E	L	V	A	V	P	C	R	L	Y	E	S	C	F	R	L	A	E	CPPC	6	4.50616e-05
228	CPPC	P	R	E	H	E	L	V	A	V	P	C	A	H	R	S	N	C	F	V	V	R	E	CPPC	6	4.50616e-05
229	CPPC	P	R	E	H	E	L	V	A	V	P	C	A	E	W	G	N	C	W	V	I	A	R	CPPC	6	4.50616e-05
230	CPPC	P	R	E	H	E	L	V	A	V	P	C	G	R	E	P	H	C	W	M	V	R	R	CPPC	6	4.50616e-05
231	CPPC	P	R	E	H	E	L	V	A	V	P	C	G	E	R	S	N	C	Y	N	I	M	V	CPPC	6	4.50616e-05
232	CPPC	P	R	E	H	E	L	V	A	V	P	C	V	G	M	V	N	C	W	A	L	E	K	CPPC	7	5.25719e-05
233	CPPC	P	R	E	H	E	L	V	A	V	P	C	E	P	V	Q	N	C	W	I	L	K	S	CPPC	6	4.50616e-05
234	CPPC	P	R	E	H	E	L	V	A	V	P	C	E	R	K	Q	N	C	Y	V	I	R	R	CPPC	6	4.50616e-05
235	CPPC	P	R	E	H	E	L	V	A	V	P	C	E	G	L	N	N	C	W	I	V	R	K	CPPC	6	4.50616e-05
236	CPPC	P	R	E	H	E	L	V	A	V	P	C	E	G	L	N	N	C	W	F	V	W	A	CPPC	6	4.50616e-05
237	CPPC	P	R	E	H	E	L	V	A	V	P	C	S	S	V	N	N	C	W	E	L	T	R	CPPC	6	4.50616e-05
238	CPPC	P	R	E	H	E	L	V	A	V	P	C	T	N	E	S	N	C	W	V	L	E	H	CPPC	5	3.75514e-05
239	CPPC	P	R	E	H	E	L	V	A	V	P	C	S	K	K	S	N	C	Y	L	V	M	E	CPPC	5	3.75514e-05
240	CPPC	P	R	E	H	E	L	V	A	V	P	C	S	N	F	T	N	C	W	Q	L	E	S	CPPC	5	3.75514e-05
241	CPPC	P	R	E	H	E	L	V	A	V	P	C	S	A	R	A	N	C	W	L	I	E	T	CPPC	5	3.75514e-05
242	CPPC	P	R	E	H	E	L	V	A	V	P	C	P	T	R	P	T	C	Y	V	V	E	R	CPPC	5	3.75514e-05
243	CPPC	P	R	E	H	E	L	V	A	V	P	C	P	E	F	R	N	C	Y	L	V	K	R	CPPC	5	3.75514e-05
244	CPPC	P	R	E	H	E	L	V	A	V	P	C	P	T	E	H	E	C	W	F	V	V	L	CPPC	5	3.75514e-05
245	CPPC	P	R	E	H	E	L	V	A	V	P	C	P	L	E	P	N	C	W	I	L	H	F	CPPC	5	3.75514e-05
246	CPPC	P	R	E	H	E	L	V	A	V	P	C	L	T	R	P	N	C	Y	V	V	E	R	CPPC	5	3.75514e-05
247	CPPC	P	R	E	H	E	L	V	A	V	P	C	E	S	E	R	T	C	W	A	L	L	V	CPPC	6	4.50616e-05
248	CPPC	P	R	E	H	E	L	V	A	V	P	C	D	A	T	R	Q	C	L	A	S	S	S	CPPC	5	3.75514e-05
249	CPPC	P	R	E	H	E	L	V	A	V	P	C	A	E	R	S	N	W	W	I	V	R	K	CPPC	5	3.75514e-05
250	CPPC	P	R	E	H	E	L	V	A	V	P	C	A	E	R	S	N	C	W	S	V	R	K	CPPC	5	3.75514e-05
251	CPPC	P	R	E	H	E	L	V	A	V	P	C	G	S	E	K	N	C	W	T	I	A	R	CPPC	5	3.75514e-05
252	CPPC	P	R	E	H	E	L	V	A	V	P	C	G	R	E	P	N	W	W	M	V	R	R	CPPC	5	3.75514e-05
253	CPPC	P	R	E	H	E	L	V	A	V	P	C	V	S	A	T	N	C	Y	E	V	I	E	CPPC	5	3.75514e-05
254	CPPC	P	R	E	H	E	L	V	A	V	P	C	E	T	V	R	N	C	W	H	I	M	E	CPPC	5	3.75514e-05
255	CPPC	P	R	E	H	E	L	V	A	V	P	C	E	G	L	N	N	S	W	F	V	E	A	CPPC	5	3.75514e-05
256	CPPC	P	R	E	H	E	L	V	A	V	P	C	E	G	L	N	N	G	W	F	V	E	A	CPPC	5	3.75514e-05
257	CPPC	P	R	E	H	E	L	V	A	V	P	C	E	G	L	N	N	C	R	F	V	E	A	CPPC	6	4.50616e-05
258	CPPC	P	R	E	H	E	L	V	A	V	P	C	E	G	L	N	N	C	L	F	V	E	A	CPPC	5	3.75514e-05
259	CPPC	P	R	E	H	E	L	V	A	V	P	C	Y	V	V	L	P	C	V	H	S	L	E	CPPC	5	3.75514e-05
260	CPPC	P	R	E	H	E	L	V	A	V	P	C	S	S	H	P	N	C	W	M	I	Y	E	CPPC	5	3.75514e-05
261	CPPC	P	R	E	H	E	L	V	A	V	P	C	S	W	G	L	N	C	W	T	I	E	R	CPPC	5	3.75514e-05
262	CPPC	P	R	E	H	E	L	V	A	V	P	C	S	E	R	T	N	C	W	M	L	A	S	CPPC	5	3.75514e-05
263	CPPC	P	R	E	H	E	L	V	A	V	P	C	L	S	R	A	K	C	W	W	I	E	R	CPPC	5	3.75514e-05
264	CPPC	P	R	E	H	E	L	V	A	V	P	C	R	P	Y	T	E	C	W	A	V	L	I	CPPC	4	3.00411e-05
265	CPPC	P	R	E	H	E	L	V	A	V	P	C	R	D	V	M	N	C	W	L	V	E	E	CPPC	4	3.00411e-05
266	CPPC	P	R	E	H	E	L	V	A	V	P	C	R	V	M	A	N	C	F	R	V	T	E	CPPC	6	4.50616e-05
267	CPPC	P	R	E	H	E	L	V	A	V	P	C	S	I	K	R	N	C	W	Y	V	E	E	CPPC	4	3.00411e-05
268	CPPC	P	R	E	H	E	L	V	A	V	P	C	S	V	V	F	R	C	K	Y	A	D	G	CPPC	4	3.00411e-05
269	CPPC	P	R	E	H	E	L	V	A	V	P	C	I	M	T	E	Q	C	H	R	R	E	F	CPPC	4	3.00411e-05
270	CPPC	P	R	E	H	E	L	V	A	V	P	C	I	M	E	P	N	C	F	I	V	R	P	CPPC	4	3.00411e-05
271	CPPC	P	R	E	H	E	L	V	A	V	P	C	I	F	L	Q	R	C	G	E	W	L	P	CPPC	4	3.00411e-05
272	CPPC	P	R	E	H	E	L	V	A	V	P	C	Q	T	V	R	N	C	W	Q	I	M	E	CPPC	4	3.00411e-05
273	CPPC	P	R	E	H	E	L	V	A	V	P	C	Q	T	S	K	N	C	W	T	I	S	E	CPPC	4	3.00411e-05
274	CPPC	P	R	E	H	E	L	V	A	V	P	C	P	T	R	P	N	C	Y	V	V	Y	R	CPPC	5	3.75514e-05
275	CPPC	P	R	E	H	E	L	V	A	V	P	C	P	A	R	F	N	C	W	N	V	I	E	CPPC	4	3.00411e-05
276	CPPC	P	R	E	H	E	L	V	A	V	P	C	P	E	F	R	N	C	E	I	V	K	R	CPPC	4	3.00411e-05
277	CPPC	P	R	E	H	E	L	V	A	V	P	C	P	S	R	S	N	C	W	G	I	E	F	CPPC	4	3.00411e-05
278	CPPC	P	R	E	H	E	L	V	A	V	P	C	R	G	D	H	N	C	W	V	I	M	E	CPPC	4	3.00411e-05
279	CPPC	P	R	E	H	E	L	V	A	V	P	C	L	S	S	G	N	C	W	E	L	I	F	CPPC	4	3.00411e-05
280	CPPC	P	R	E	H	E	L	V	A	V	P	C	L	S	W	G	R	C	A	Q	E	R	L	CPPC	4	3.00411e-05
281	CPPC	P	R	E	H	E	L	V	A	V	P	C	A	E	A	L	L	C	H	V	L	E	W	CPPC	4	3.00411e-05
282	CPPC	P	R	E	H	E	L	V	A	V	P	C	A	G	V	A	T	C	W	A	V	R	E	CPPC	4	3.00411e-05
283	CPPC	P	R	E	H	E	L	V	A	V	P	C	A	F	Q	S	N	C	W	E	I	K	R	CPPC	4	3.00411e-05
284	CPPC	P	R	E	H	E	L	V	A	V	P	C	A	F	E	S	N	W	W	E	I	K	R	CPPC	4	3.00411e-05
285	CPPC	P	R	E	H	E	L	V	A	V	P	C	A	F	E	S	N	C	R	E	I	K	R	CPPC	5	3.75514e-05
286	CPPC	P	R	E	H	E	L	V	A	V	P	C	A	F	E	S	N	C	W	E	I	K	W	CPPC	4	3.00411e-05
287	CPPC	P	R	E	H	E	L	V	A	V	P	C	A	F	E	S	N	C	W	E	V	K	R	CPPC	4	3.00411e-05
288	CPPC	P	R	E	H	E	L	V	A	V	P	C	A	F	E	S	N	C	W	G	I	K	R	CPPC	4	3.00411e-05
289	CPPC	P	R	E	H	E	L	V	A	V	P	C	A	F	E	S	N	F	W	E	I	K	R	CPPC	4	3.00411e-05
290	CPPC	P	R	E	H	E	L	V	A	V	P	C	A	F	E	S	S	C	W	E	I	K	R	CPPC	4	3.00411e-05
291	CPPC	P	R	E	H	E	L	V	A	V	P	C	A	F	S	S	N	C	W	E	I	K	R	CPPC	4	3.00411e-05
292	CPPC	P	R	E	H	E	L	V	A	V	P	C	G	T	T	L	I	C	A	F	E	Y	E	CPPC	4	3.00411e-05
293	CPPC	P	R	E	H	E	L	V	A	V	P	C	V	T	G	R	P	C	L	G	P	*	W	CPPC	4	3.00411e-05
294	CPPC	P	R	E	H	E	L	V	A	V	P	C	E	R	L	I	N	C	W	F	V	R	M	CPPC	4	3.00411e-05
295	CPPC	P	R	E	H	E	L	V	A	V	P	C	E	E	N	V	N	C	W	H	V	Q	I	CPPC	4	3.00411e-05
296	CPPC	P	R	E	H	E	L	V	A	V	P	C	E	D	L	N	N	C	W	F	V	E	A	CPPC	4	3.00411e-05
297	CPPC	P	R	E	H	E	L	V	A	V	P	C	E	G	L	N	N	C	W	N	V	I	E	CPPC	4	3.00411e-05
298	CPPC	P	R	E	H	E	L	V	A	V	P	C	E	G	L	N	N	C	W	F	V	Q	A	CPPC	4	3.00411e-05
299	CPPC	P	R	E	H	E	L	V	A	V	P	C	E	G	L	N	N	C	W	F	V	E	E	CPPC	4	3.00411e-05
300	CPPC	P	R	E	H	E	L	V	A	V	P	C	E	G	L	N	N	F	W	F	V	E	A	CPPC	4	3.00411e-05
301	CPPC	P	R	E	H	E	L	V	A	V	P	C	E	G	L	D	N	C	W	F	V	E	A	CPPC	4	3.00411e-05
302	CPPC	P	R	E	H	E	L	V	A	V	P	C	E	G	L	Y	N	C	W	F	V	E	A	CPPC	4	3.00411e-05
303	CPPC	P	R	E	H	E	L	V	A	V	P	C	E	E	R	A	R	C	I	E	R	K	G	CPPC	4	3.00411e-05
304	CPPC	P	R	E	H	E	L	V	A	V	P	C	Y	R	S	G	N	C	W	I	L	E	W	CPPC	4	3.00411e-05
305	CPPC	P	R	E	H	E	L	V	A	V	P	C	Y	Y	S	R	R	C	E	R	Y	K	E	CPPC	4	3.00411e-05
306	CPPC	P	R	E	H	E	L	V	A	V	P	C	S	V	S	I	F	C	G	G	L	K	E	CPPC	4	3.00411e-05
307	CPPC	P	R	E	H	E	L	V	A	V	P	C	S	E	Q	R	S	C	E	S	I	Y	A	CPPC	4	3.00411e-05
308	CPPC	P	R	E	H	E	L	V	A	V	P	C	F	E	G	V	E	C	E	G	W	F	A	CPPC	4	3.00411e-05
309	CPPC	P	R	E	H	E	L	V	A	V	P	C	N	T	R	E	N	C	F	L	V	Y	E	CPPC	3	2.25308e-05
310	CPPC	P	R	E	H	E	L	V	A	V	P	C	N	H	E	G	N	C	W	R	V	S	A	CPPC	3	2.25308e-05
311	CPPC	P	R	E	H	E	L	V	A	V	P	C	T	E	W	S	N	C	W	V	V	S	P	CPPC	3	2.25308e-05
312	CPPC	P	R	E	H	E	L	V	A	V	P	C	S	H	G	E	Q	C	R	I	R	L	E	CPPC	3	2.25308e-05
313	CPPC	P	R	E	H	E	L	V	A	V	P	C	Q	T	V	R	N	C	W	H	S	M	E	CPPC	3	2.25308e-05
314	CPPC	P	R	E	H	E	L	V	A	V	P	C	Q	T	R	P	N	C	Y	V	V	E	R	CPPC	3	2.25308e-05
315	CPPC	P	R	E	H	E	L	V	A	V	P	C	H	P	L	A	A	C	R	W	E	N	G	CPPC	3	2.25308e-05
316	CPPC	P	R	E	H	E	L	V	A	V	P	C	H	D	A	M	P	C	R	A	Y	N	E	CPPC	3	2.25308e-05
317	CPPC	P	R	E	H	E	L	V	A	V	P	C	H	Y	E	P	N	C	W	F	L	I	W	CPPC	3	2.25308e-05
318	CPPC	P	R	E	H	E	L	V	A	V	P	C	P	T	R	P	N	W	Y	V	V	E	R	CPPC	3	2.25308e-05
319	CPPC	P	R	E	H	E	L	V	A	V	P	C	P	A	R	L	K	C	W	N	V	I	E	CPPC	3	2.25308e-05
320	CPPC	P	R	E	H	E	L	V	A	V	P	C	P	A	R	L	N	C	W	K	V	I	E	CPPC	3	2.25308e-05
321	CPPC	P	R	E	H	E	L	V	A	V	P	C	P	E	F	R	N	C	Y	I	V	N	R	CPPC	3	2.25308e-05
322	CPPC	P	R	E	H	E	L	V	A	V	P	C	P	E	F	R	N	F	Y	I	V	K	R	CPPC	3	2.25308e-05
323	CPPC	P	R	E	H	E	L	V	A	V	P	C	P	Y	D	L	E	C	W	R	L	V	L	CPPC	3	2.25308e-05
324	CPPC	P	R	E	H	E	L	V	A	V	P	C	P	S	F	R	N	C	Y	I	V	K	R	CPPC	3	2.25308e-05
325	CPPC	P	R	E	H	E	L	V	A	V	P	C	P	W	S	F	T	C	A	I	R	E	R	CPPC	3	2.25308e-05
326	CPPC	P	R	E	H	E	L	V	A	V	P	C	P	F	A	P	L	C	I	A	H	G	S	CPPC	3	2.25308e-05
327	CPPC	P	R	E	H	E	L	V	A	V	P	C	P	R	E	S	G	C	F	R	V	I	W	CPPC	3	2.25308e-05
328	CPPC	P	R	E	H	E	L	V	A	V	P	C	P	L	H	L	N	C	W	E	L	R	L	CPPC	3	2.25308e-05
329	CPPC	P	R	E	H	E	L	V	A	V	P	C	P	A	G	R	V	C	L	Q	Y	R	E	CPPC	3	2.25308e-05
330	CPPC	P	R	E	H	E	L	V	A	V	P	C	P	Y	G	V	E	C	W	M	S	V	V	CPPC	3	2.25308e-05
331	CPPC	P	R	E	H	E	L	V	A	V	P	C	R	Q	R	E	N	C	W	W	V	S	E	CPPC	3	2.25308e-05
332	CPPC	P	R	E	H	E	L	V	A	V	P	C	R	A	R	L	N	C	W	R	V	L	E	CPPC	3	2.25308e-05
333	CPPC	P	R	E	H	E	L	V	A	V	P	C	R	G	D	R	E	C	W	W	V	Y	F	CPPC	3	2.25308e-05
334	CPPC	P	R	E	H	E	L	V	A	V	P	C	R	L	T	P	T	C	W	K	V	M	E	CPPC	3	2.25308e-05
335	CPPC	P	R	E	H	E	L	V	A	V	P	C	L	A	R	L	N	C	W	N	V	I	E	CPPC	3	2.25308e-05
336	CPPC	P	R	E	H	E	L	V	A	V	P	C	L	E	F	R	N	C	Y	I	V	K	R	CPPC	3	2.25308e-05
337	CPPC	P	R	E	H	E	L	V	A	V	P	C	L	R	G	R	E	C	F	F	I	M	V	CPPC	3	2.25308e-05
338	CPPC	P	R	E	H	E	L	V	A	V	P	C	L	R	D	R	E	C	L	A	L	R	A	CPPC	3	2.25308e-05
339	CPPC	P	R	E	H	E	L	V	A	V	P	C	L	G	M	S	Y	C	L	K	L	Y	T	CPPC	3	2.25308e-05
340	CPPC	P	R	E	H	E	L	V	A	V	P	C	E	R	R	I	N	C	W	S	S	E	A	CPPC	3	2.25308e-05
341	CPPC	P	R	E	H	E	L	V	A	V	P	C	D	M	V	L	E	C	S	V	T	L	E	CPPC	3	2.25308e-05
342	CPPC	P	R	E	H	E	L	V	A	V	P	C	A	I	E	S	N	C	W	E	I	K	R	CPPC	3	2.25308e-05
343	CPPC	P	R	E	H	E	L	V	A	V	P	C	A	E	R	A	N	C	W	I	V	R	K	CPPC	3	2.25308e-05
344	CPPC	P	R	E	H	E	L	V	A	V	P	C	A	E	R	S	H	C	W	I	V	R	K	CPPC	3	2.25308e-05
345	CPPC	P	R	E	H	E	L	V	A	V	P	C	A	S	E	S	N	C	W	E	I	K	R	CPPC	3	2.25308e-05
346	CPPC	P	R	E	H	E	L	V	A	V	P	C	A	F	T	H	N	C	W	L	L	V	E	CPPC	3	2.25308e-05
347	CPPC	P	R	E	H	E	L	V	A	V	P	C	A	F	E	S	N	S	W	E	I	K	R	CPPC	3	2.25308e-05
348	CPPC	P	R	E	H	E	L	V	A	V	P	C	A	F	E	S	N	C	W	E	I	K	M	CPPC	3	2.25308e-05
349	CPPC	P	R	E	H	E	L	V	A	V	P	C	A	F	E	S	N	C	W	E	I	K	G	CPPC	3	2.25308e-05
350	CPPC	P	R	E	H	E	L	V	A	V	P	C	A	F	E	S	N	C	W	E	I	N	R	CPPC	4	3.00411e-05
351	CPPC	P	R	E	H	E	L	V	A	V	P	C	A	F	E	S	N	C	W	V	V	E	R	CPPC	3	2.25308e-05
352	CPPC	P	R	E	H	E	L	V	A	V	P	C	G	G	M	A	N	C	W	F	V	E	A	CPPC	3	2.25308e-05
353	CPPC	P	R	E	H	E	L	V	A	V	P	C	G	N	E	Q	N	C	W	E	I	K	R	CPPC	3	2.25308e-05
354	CPPC	P	R	E	H	E	L	V	A	V	P	C	G	R	E	P	K	C	W	M	V	R	R	CPPC	3	2.25308e-05
355	CPPC	P	R	E	H	E	L	V	A	V	P	C	G	R	E	P	N	C	W	F	V	E	A	CPPC	3	2.25308e-05
356	CPPC	P	R	E	H	E	L	V	A	V	P	C	G	R	E	P	T	C	W	M	V	R	R	CPPC	3	2.25308e-05
357	CPPC	P	R	E	H	E	L	V	A	V	P	C	G	W	V	R	R	C	R	L	Q	Q	R	CPPC	3	2.25308e-05
358	CPPC	P	R	E	H	E	L	V	A	V	P	C	V	N	G	L	L	C	W	L	F	G	E	CPPC	3	2.25308e-05
359	CPPC	P	R	E	H	E	L	V	A	V	P	C	V	Q	R	D	K	C	W	E	I	L	E	CPPC	3	2.25308e-05
360	CPPC	P	R	E	H	E	L	V	A	V	P	C	V	H	E	P	N	C	W	E	L	R	K	CPPC	3	2.25308e-05
361	CPPC	P	R	E	H	E	L	V	A	V	P	C	V	R	S	R	R	C	E	R	S	A	E	CPPC	3	2.25308e-05
362	CPPC	P	R	E	H	E	L	V	A	V	P	C	V	G	R	V	H	C	W	F	I	Q	E	CPPC	3	2.25308e-05
363	CPPC	P	R	E	H	E	L	V	A	V	P	C	V	S	T	E	E	C	S	S	W	S	N	CPPC	3	2.25308e-05
364	CPPC	P	R	E	H	E	L	V	A	V	P	C	V	W	R	Y	E	C	R	M	G	V	G	CPPC	3	2.25308e-05
365	CPPC	P	R	E	H	E	L	V	A	V	P	C	V	W	A	W	V	C	A	E	E	G	E	CPPC	3	2.25308e-05
366	CPPC	P	R	E	H	E	L	V	A	V	P	C	E	T	W	M	N	C	W	T	L	V	E	CPPC	3	2.25308e-05
367	CPPC	P	R	E	H	E	L	V	A	V	P	C	E	G	P	N	N	C	W	F	V	E	A	CPPC	3	2.25308e-05
368	CPPC	P	R	E	H	E	L	V	A	V	P	C	E	G	L	N	N	C	W	F	I	Q	E	CPPC	3	2.25308e-05
369	CPPC	P	R	E	H	E	L	V	A	V	P	C	E	G	L	N	N	C	W	F	E	E	A	CPPC	3	2.25308e-05
370	CPPC	P	R	E	H	E	L	V	A	V	P	C	E	G	L	N	N	C	W	F	A	E	A	CPPC	3	2.25308e-05
371	CPPC	P	R	E	H	E	L	V	A	V	P	C	E	G	L	N	D	C	W	F	V	E	A	CPPC	3	2.25308e-05
372	CPPC	P	R	E	H	E	L	V	A	V	P	C	E	G	L	S	N	C	W	F	V	E	A	CPPC	3	2.25308e-05
373	CPPC	P	R	E	H	E	L	V	A	V	P	C	E	S	R	R	N	C	W	K	I	F	W	CPPC	3	2.25308e-05
374	CPPC	P	R	E	H	E	L	V	A	V	P	C	E	W	E	R	N	C	W	H	L	I	S	CPPC	3	2.25308e-05
375	CPPC	P	R	E	H	E	L	V	A	V	P	C	E	W	Y	G	W	C	S	S	H	W	L	CPPC	3	2.25308e-05
376	CPPC	P	R	E	H	E	L	V	A	V	P	C	E	F	Q	V	N	C	W	T	I	S	Y	CPPC	3	2.25308e-05
377	CPPC	P	R	E	H	E	L	V	A	V	P	C	Y	W	Q	M	S	C	W	E	Y	E	E	CPPC	3	2.25308e-05
378	CPPC	P	R	E	H	E	L	V	A	V	P	C	Y	W	L	P	N	C	W	F	V	R	E	CPPC	3	2.25308e-05
379	CPPC	P	R	E	H	E	L	V	A	V	P	C	S	K	V	Q	N	C	W	F	V	E	A	CPPC	3	2.25308e-05
380	CPPC	P	R	E	H	E	L	V	A	V	P	C	S	K	V	E	N	C	W	E	L	V	A	CPPC	3	2.25308e-05
381	CPPC	P	R	E	H	E	L	V	A	V	P	C	S	K	L	Q	N	C	W	E	L	V	A	CPPC	3	2.25308e-05
382	CPPC	P	R	E	H	E	L	V	A	V	P	C	S	P	G	R	L	C	L	F	A	Y	E	CPPC	3	2.25308e-05
383	CPPC	P	R	E	H	E	L	V	A	V	P	C	S	A	E	S	N	C	W	N	I	R	R	CPPC	3	2.25308e-05
384	CPPC	P	R	E	H	E	L	V	A	V	P	C	W	R	R	W	L	C	E	E	S	A	M	CPPC	3	2.25308e-05
385	CPPC	P	R	E	H	E	L	V	A	V	P	C	L	R	M	L	L	C	V	R	E	R	Y	CPPC	3	2.25308e-05
386	CPPC	P	R	E	H	E	L	V	A	V	P	C	F	S	G	R	R	C	E	W	Y	K	P	CPPC	3	2.25308e-05
387	CPPC	P	R	E	H	E	L	V	A	V	P	C	F	D	T	E	Y	C	A	N	F	N	M	CPPC	3	2.25308e-05
388	CPPC	P	R	E	H	E	L	V	A	V	P	C	E	M	D	G	V	C	S	Q	H	V	K	CPPC	2	1.50205e-05
389	CPPC	P	R	E	H	E	L	V	A	V	P	C	K	S	E	T	N	C	Y	I	V	R	K	CPPC	2	1.50205e-05
390	CPPC	P	R	E	H	E	L	V	A	V	P	C	N	R	L	A	H	C	E	G	D	Y	E	CPPC	2	1.50205e-05
391	CPPC	P	R	E	H	E	L	V	A	V	P	C	N	L	S	R	G	C	S	S	S	E	E	CPPC	2	1.50205e-05
392	CPPC	P	R	E	H	E	L	V	A	V	P	C	N	L	Y	I	V	C	P	E	R	R	E	CPPC	2	1.50205e-05
393	CPPC	P	R	E	H	E	L	V	A	V	P	C	T	T	E	P	N	C	W	H	V	Y	P	CPPC	2	1.50205e-05
394	CPPC	P	R	E	H	E	L	V	A	V	P	C	T	L	Y	D	V	C	Q	T	R	A	I	CPPC	2	1.50205e-05
395	CPPC	P	R	E	H	E	L	V	A	V	P	C	T	E	Y	L	P	C	F	S	T	L	A	CPPC	2	1.50205e-05
396	CPPC	P	R	E	H	E	L	V	A	V	P	C	T	R	Y	L	R	C	I	E	S	L	E	CPPC	2	1.50205e-05
397	CPPC	P	R	E	H	E	L	V	A	V	P	C	T	W	R	T	G	C	W	L	L	K	E	CPPC	2	1.50205e-05
398	CPPC	P	R	E	H	E	L	V	A	V	P	C	T	W	R	E	W	C	S	R	W	A	Y	CPPC	2	1.50205e-05
399	CPPC	P	R	E	H	E	L	V	A	V	P	C	R	S	V	R	N	C	W	E	L	V	P	CPPC	2	1.50205e-05
400	CPPC	P	R	E	H	E	L	V	A	V	P	C	R	D	R	N	P	C	R	V	E	V	E	CPPC	2	1.50205e-05
401	CPPC	P	R	E	H	E	L	V	A	V	P	C	S	N	R	I	N	C	G	E	L	I	A	CPPC	2	1.50205e-05
402	CPPC	P	R	E	H	E	L	V	A	V	P	C	S	T	R	I	N	C	W	E	L	I	A	CPPC	2	1.50205e-05
403	CPPC	P	R	E	H	E	L	V	A	V	P	C	S	I	E	F	S	C	N	G	H	Y	W	CPPC	2	1.50205e-05
404	CPPC	P	R	E	H	E	L	V	A	V	P	C	S	R	R	L	N	C	W	E	L	R	A	CPPC	2	1.50205e-05
405	CPPC	P	R	E	H	E	L	V	A	V	P	C	S	G	P	M	W	C	R	D	*	D	K	CPPC	2	1.50205e-05
406	CPPC	P	R	E	H	E	L	V	A	V	P	C	S	E	W	F	R	C	E	H	T	R	P	CPPC	2	1.50205e-05
407	CPPC	P	R	E	H	E	L	V	A	V	P	C	M	L	G	M	W	C	T	R	L	E	L	CPPC	2	1.50205e-05
408	CPPC	P	R	E	H	E	L	V	A	V	P	C	M	Y	H	F	W	C	T	S	Q	T	S	CPPC	2	1.50205e-05
409	CPPC	P	R	E	H	E	L	V	A	V	P	C	I	T	E	S	N	C	W	V	L	R	Y	CPPC	2	1.50205e-05
410	CPPC	P	R	E	H	E	L	V	A	V	P	C	I	A	R	M	L	C	F	V	R	R	E	CPPC	2	1.50205e-05
411	CPPC	P	R	E	H	E	L	V	A	V	P	C	I	G	S	Q	F	C	P	A	E	E	E	CPPC	2	1.50205e-05
412	CPPC	P	R	E	H	E	L	V	A	V	P	C	Q	T	V	R	N	C	W	R	I	M	E	CPPC	2	1.50205e-05
413	CPPC	P	R	E	H	E	L	V	A	V	P	C	Q	T	V	R	N	C	W	E	L	V	A	CPPC	2	1.50205e-05
414	CPPC	P	R	E	H	E	L	V	A	V	P	C	Q	T	V	R	Y	C	W	H	I	M	E	CPPC	2	1.50205e-05
415	CPPC	P	R	E	H	E	L	V	A	V	P	C	Q	M	V	R	N	C	W	H	I	M	E	CPPC	2	1.50205e-05
416	CPPC	P	R	E	H	E	L	V	A	V	P	C	Q	R	E	P	T	C	Y	V	I	S	R	CPPC	2	1.50205e-05
417	CPPC	P	R	E	H	E	L	V	A	V	P	C	Q	S	T	Q	N	C	W	F	V	E	N	CPPC	2	1.50205e-05
418	CPPC	P	R	E	H	E	L	V	A	V	P	C	H	S	P	N	P	C	L	D	E	F	M	CPPC	2	1.50205e-05
419	CPPC	P	R	E	H	E	L	V	A	V	P	C	H	R	G	F	E	C	M	S	P	L	L	CPPC	2	1.50205e-05
420	CPPC	P	R	E	H	E	L	V	A	V	P	C	P	N	L	G	K	C	*	E	I	R	L	CPPC	2	1.50205e-05
421	CPPC	P	R	E	H	E	L	V	A	V	P	C	P	T	R	P	N	C	S	V	V	E	R	CPPC	2	1.50205e-05
422	CPPC	P	R	E	H	E	L	V	A	V	P	C	P	T	R	P	N	C	W	E	I	K	R	CPPC	2	1.50205e-05
423	CPPC	P	R	E	H	E	L	V	A	V	P	C	P	T	S	F	E	C	F	F	V	Y	F	CPPC	2	1.50205e-05
424	CPPC	P	R	E	H	E	L	V	A	V	P	C	P	P	V	K	E	C	P	F	G	S	E	CPPC	2	1.50205e-05
425	CPPC	P	R	E	H	E	L	V	A	V	P	C	P	A	R	L	N	W	W	N	V	I	E	CPPC	2	1.50205e-05
426	CPPC	P	R	E	H	E	L	V	A	V	P	C	P	A	R	L	N	C	W	F	V	E	A	CPPC	2	1.50205e-05
427	CPPC	P	R	E	H	E	L	V	A	V	P	C	P	A	R	L	H	C	W	N	V	I	E	CPPC	2	1.50205e-05
428	CPPC	P	R	E	H	E	L	V	A	V	P	C	P	E	Y	R	N	C	Y	I	V	K	R	CPPC	2	1.50205e-05
429	CPPC	P	R	E	H	E	L	V	A	V	P	C	P	E	F	R	K	C	Y	I	V	K	R	CPPC	2	1.50205e-05
430	CPPC	P	R	E	H	E	L	V	A	V	P	C	P	E	F	R	N	W	Y	I	V	K	R	CPPC	2	1.50205e-05
431	CPPC	P	R	E	H	E	L	V	A	V	P	C	P	E	F	R	N	C	Y	I	V	K	Q	CPPC	2	1.50205e-05
432	CPPC	P	R	E	H	E	L	V	A	V	P	C	P	E	F	R	N	C	S	I	V	K	R	CPPC	2	1.50205e-05
433	CPPC	P	R	E	H	E	L	V	A	V	P	C	P	S	M	M	E	C	V	D	N	E	F	CPPC	2	1.50205e-05
434	CPPC	P	R	E	H	E	L	V	A	V	P	C	P	F	R	K	N	C	W	E	I	K	R	CPPC	2	1.50205e-05
435	CPPC	P	R	E	H	E	L	V	A	V	P	C	P	P	E	R	R	C	T	E	F	V	A	CPPC	2	1.50205e-05
436	CPPC	P	R	E	H	E	L	V	A	V	P	C	P	L	M	E	E	C	R	N	L	A	R	CPPC	2	1.50205e-05
437	CPPC	P	R	E	H	E	L	V	A	V	P	C	P	A	R	E	N	C	W	E	I	K	R	CPPC	2	1.50205e-05
438	CPPC	P	R	E	H	E	L	V	A	V	P	C	P	V	R	L	N	C	Y	W	V	E	S	CPPC	2	1.50205e-05
439	CPPC	P	R	E	H	E	L	V	A	V	P	C	P	E	R	R	N	C	W	E	L	V	A	CPPC	2	1.50205e-05
440	CPPC	P	R	E	H	E	L	V	A	V	P	C	P	E	R	R	T	C	W	L	V	E	P	CPPC	2	1.50205e-05
441	CPPC	P	R	E	H	E	L	V	A	V	P	C	R	P	E	P	I	C	R	G	G	A	R	CPPC	2	1.50205e-05
442	CPPC	P	R	E	H	E	L	V	A	V	P	C	R	A	R	L	K	C	W	R	V	I	E	CPPC	2	1.50205e-05
443	CPPC	P	R	E	H	E	L	V	A	V	P	C	R	A	R	L	N	C	W	W	V	I	E	CPPC	2	1.50205e-05
444	CPPC	P	R	E	H	E	L	V	A	V	P	C	R	A	V	R	N	C	W	H	I	M	E	CPPC	2	1.50205e-05
445	CPPC	P	R	E	H	E	L	V	A	V	P	C	R	P	L	N	N	C	H	E	W	E	V	CPPC	2	1.50205e-05
446	CPPC	P	R	E	H	E	L	V	A	V	P	C	R	P	D	R	R	C	G	H	I	A	P	CPPC	2	1.50205e-05
447	CPPC	P	R	E	H	E	L	V	A	V	P	C	R	R	H	S	S	C	R	N	L	Q	L	CPPC	2	1.50205e-05
448	CPPC	P	R	E	H	E	L	V	A	V	P	C	R	R	L	L	E	C	S	E	N	K	A	CPPC	2	1.50205e-05
449	CPPC	P	R	E	H	E	L	V	A	V	P	C	R	L	T	P	N	C	W	K	A	M	E	CPPC	2	1.50205e-05
450	CPPC	P	R	E	H	E	L	V	A	V	P	C	R	E	S	F	E	C	E	L	E	K	V	CPPC	2	1.50205e-05
451	CPPC	P	R	E	H	E	L	V	A	V	P	C	L	S	R	L	L	C	R	L	F	H	E	CPPC	2	1.50205e-05
452	CPPC	P	R	E	H	E	L	V	A	V	P	C	L	R	P	S	E	C	D	V	S	A	S	CPPC	2	1.50205e-05
453	CPPC	P	R	E	H	E	L	V	A	V	P	C	L	D	R	V	T	C	K	R	*	P	L	CPPC	2	1.50205e-05
454	CPPC	P	R	E	H	E	L	V	A	V	P	C	L	A	R	L	N	C	W	R	V	I	E	CPPC	2	1.50205e-05
455	CPPC	P	R	E	H	E	L	V	A	V	P	C	L	A	W	F	F	C	L	E	V	W	E	CPPC	2	1.50205e-05
456	CPPC	P	R	E	H	E	L	V	A	V	P	C	L	T	L	E	S	C	R	R	Q	E	L	CPPC	2	1.50205e-05
457	CPPC	P	R	E	H	E	L	V	A	V	P	C	L	E	R	P	N	C	W	E	I	K	R	CPPC	2	1.50205e-05
458	CPPC	P	R	E	H	E	L	V	A	V	P	C	L	E	R	P	N	C	W	A	L	T	G	CPPC	2	1.50205e-05
459	CPPC	P	R	E	H	E	L	V	A	V	P	C	L	E	R	P	T	C	W	A	L	T	R	CPPC	2	1.50205e-05
460	CPPC	P	R	E	H	E	L	V	A	V	P	C	L	E	R	L	N	C	W	A	L	T	R	CPPC	2	1.50205e-05
461	CPPC	P	R	E	H	E	L	V	A	V	P	C	E	N	G	T	A	C	E	I	V	P	E	CPPC	2	1.50205e-05
462	CPPC	P	R	E	H	E	L	V	A	V	P	C	E	H	F	E	N	C	W	R	S	E	E	CPPC	2	1.50205e-05
463	CPPC	P	R	E	H	E	L	V	A	V	P	C	E	G	F	L	T	C	W	V	L	E	S	CPPC	2	1.50205e-05
464	CPPC	P	R	E	H	E	L	V	A	V	P	C	E	S	E	R	N	C	W	V	L	L	V	CPPC	2	1.50205e-05
465	CPPC	P	R	E	H	E	L	V	A	V	P	C	D	E	Y	S	E	C	W	Y	V	L	R	CPPC	2	1.50205e-05
466	CPPC	P	R	E	H	E	L	V	A	V	P	C	A	R	A	R	T	C	W	E	L	V	S	CPPC	2	1.50205e-05
467	CPPC	P	R	E	H	E	L	V	A	V	P	C	A	L	E	Y	R	C	S	R	S	R	R	CPPC	2	1.50205e-05
468	CPPC	P	R	E	H	E	L	V	A	V	P	C	A	G	E	T	T	C	W	F	I	V	R	CPPC	2	1.50205e-05
469	CPPC	P	R	E	H	E	L	V	A	V	P	C	A	V	T	V	P	C	*	V	P	Q	S	CPPC	2	1.50205e-05
470	CPPC	P	R	E	H	E	L	V	A	V	P	C	A	K	V	S	N	C	W	E	V	S	K	CPPC	2	1.50205e-05
471	CPPC	P	R	E	H	E	L	V	A	V	P	C	A	Q	P	A	R	C	R	R	E	R	A	CPPC	2	1.50205e-05
472	CPPC	P	R	E	H	E	L	V	A	V	P	C	A	L	L	E	L	C	H	E	L	L	I	CPPC	2	1.50205e-05
473	CPPC	P	R	E	H	E	L	V	A	V	P	C	A	E	R	F	E	C	E	G	Y	I	I	CPPC	2	1.50205e-05
474	CPPC	P	R	E	H	E	L	V	A	V	P	C	A	E	E	M	E	C	W	M	V	L	V	CPPC	2	1.50205e-05
475	CPPC	P	R	E	H	E	L	V	A	V	P	C	A	G	K	A	E	C	F	V	L	V	M	CPPC	2	1.50205e-05
476	CPPC	P	R	E	H	E	L	V	A	V	P	C	A	E	R	A	N	C	Y	L	L	V	I	CPPC	2	1.50205e-05
477	CPPC	P	R	E	H	E	L	V	A	V	P	C	A	E	R	S	N	C	W	I	V	R	T	CPPC	2	1.50205e-05
478	CPPC	P	R	E	H	E	L	V	A	V	P	C	A	E	R	S	N	F	W	I	V	R	K	CPPC	2	1.50205e-05
479	CPPC	P	R	E	H	E	L	V	A	V	P	C	A	E	R	S	T	C	W	I	V	R	K	CPPC	2	1.50205e-05
480	CPPC	P	R	E	H	E	L	V	A	V	P	C	A	F	E	S	N	C	W	E	I	R	R	CPPC	2	1.50205e-05
481	CPPC	P	R	E	H	E	L	V	A	V	P	C	A	F	E	S	N	C	W	E	I	L	E	CPPC	2	1.50205e-05
482	CPPC	P	R	E	H	E	L	V	A	V	P	C	A	F	E	S	N	C	W	E	I	E	R	CPPC	2	1.50205e-05
483	CPPC	P	R	E	H	E	L	V	A	V	P	C	A	F	E	S	N	C	W	F	V	E	A	CPPC	2	1.50205e-05
484	CPPC	P	R	E	H	E	L	V	A	V	P	C	A	F	E	S	N	C	L	E	I	K	R	CPPC	2	1.50205e-05
485	CPPC	P	R	E	H	E	L	V	A	V	P	C	A	F	Y	S	N	C	W	E	I	K	R	CPPC	2	1.50205e-05
486	CPPC	P	R	E	H	E	L	V	A	V	P	C	G	E	H	Q	N	C	W	A	L	Y	V	CPPC	2	1.50205e-05
487	CPPC	P	R	E	H	E	L	V	A	V	P	C	G	R	T	R	N	C	W	V	I	Q	E	CPPC	2	1.50205e-05
488	CPPC	P	R	E	H	E	L	V	A	V	P	C	G	S	L	P	V	C	A	A	Y	V	Y	CPPC	2	1.50205e-05
489	CPPC	P	R	E	H	E	L	V	A	V	P	C	G	F	V	V	L	C	V	Y	G	F	E	CPPC	2	1.50205e-05
490	CPPC	P	R	E	H	E	L	V	A	V	P	C	V	A	D	R	V	C	E	R	E	R	P	CPPC	2	1.50205e-05
491	CPPC	P	R	E	H	E	L	V	A	V	P	C	V	E	R	H	W	C	F	H	L	V	N	CPPC	2	1.50205e-05
492	CPPC	P	R	E	H	E	L	V	A	V	P	C	V	F	G	E	F	C	W	E	M	F	V	CPPC	2	1.50205e-05
493	CPPC	P	R	E	H	E	L	V	A	V	P	C	V	K	R	D	N	C	W	E	I	L	E	CPPC	2	1.50205e-05
494	CPPC	P	R	E	H	E	L	V	A	V	P	C	V	Q	R	D	H	C	W	E	I	L	E	CPPC	2	1.50205e-05
495	CPPC	P	R	E	H	E	L	V	A	V	P	C	V	P	L	E	R	C	R	R	E	E	Q	CPPC	2	1.50205e-05
496	CPPC	P	R	E	H	E	L	V	A	V	P	C	V	G	R	V	N	C	W	F	I	Q	S	CPPC	2	1.50205e-05
497	CPPC	P	R	E	H	E	L	V	A	V	P	C	V	G	R	V	N	C	W	F	V	E	A	CPPC	2	1.50205e-05
498	CPPC	P	R	E	H	E	L	V	A	V	P	C	V	E	L	L	A	C	I	V	V	E	W	CPPC	2	1.50205e-05
499	CPPC	P	R	E	H	E	L	V	A	V	P	C	V	Y	K	L	E	C	M	I	L	L	W	CPPC	2	1.50205e-05
500	CPPC	P	R	E	H	E	L	V	A	V	P	C	V	Y	E	P	N	C	W	Y	I	A	R	CPPC	2	1.50205e-05
501	CPPC	P	R	E	H	E	L	V	A	V	P	C	V	S	E	S	N	C	W	V	L	R	Q	CPPC	2	1.50205e-05
502	CPPC	P	R	E	H	E	L	V	A	V	P	C	V	F	M	R	G	C	V	T	P	E	E	CPPC	2	1.50205e-05
503	CPPC	P	R	E	H	E	L	V	A	V	P	C	E	S	S	L	E	C	R	M	L	A	F	CPPC	2	1.50205e-05
504	CPPC	P	R	E	H	E	L	V	A	V	P	C	E	P	D	N	S	C	E	T	Q	F	T	CPPC	2	1.50205e-05
505	CPPC	P	R	E	H	E	L	V	A	V	P	C	E	R	G	E	M	C	S	R	E	G	P	CPPC	2	1.50205e-05
506	CPPC	P	R	E	H	E	L	V	A	V	P	C	E	R	L	N	N	C	W	F	V	E	A	CPPC	2	1.50205e-05
507	CPPC	P	R	E	H	E	L	V	A	V	P	C	E	R	E	H	E	C	S	G	T	R	R	CPPC	2	1.50205e-05
508	CPPC	P	R	E	H	E	L	V	A	V	P	C	E	R	A	G	V	C	P	E	Y	E	L	CPPC	2	1.50205e-05
509	CPPC	P	R	E	H	E	L	V	A	V	P	C	E	R	W	R	L	C	A	E	T	P	Y	CPPC	2	1.50205e-05
510	CPPC	P	R	E	H	E	L	V	A	V	P	C	E	L	S	G	E	C	W	V	I	R	E	CPPC	2	1.50205e-05
511	CPPC	P	R	E	H	E	L	V	A	V	P	C	E	L	T	P	N	C	W	Q	I	R	Y	CPPC	2	1.50205e-05
512	CPPC	P	R	E	H	E	L	V	A	V	P	C	E	A	T	Y	P	C	A	G	H	D	T	CPPC	2	1.50205e-05
513	CPPC	P	R	E	H	E	L	V	A	V	P	C	E	G	L	N	N	Y	W	F	V	E	A	CPPC	2	1.50205e-05
514	CPPC	P	R	E	H	E	L	V	A	V	P	C	E	G	L	N	N	C	E	F	V	E	A	CPPC	2	1.50205e-05
515	CPPC	P	R	E	H	E	L	V	A	V	P	C	E	G	L	N	N	C	W	R	I	H	E	CPPC	2	1.50205e-05
516	CPPC	P	R	E	H	E	L	V	A	V	P	C	E	G	L	N	N	C	W	I	V	E	A	CPPC	2	1.50205e-05
517	CPPC	P	R	E	H	E	L	V	A	V	P	C	E	G	L	N	N	C	W	A	I	Q	R	CPPC	2	1.50205e-05
518	CPPC	P	R	E	H	E	L	V	A	V	P	C	E	G	L	N	N	C	W	F	I	V	R	CPPC	2	1.50205e-05
519	CPPC	P	R	E	H	E	L	V	A	V	P	C	E	G	L	N	N	C	W	F	V	R	K	CPPC	2	1.50205e-05
520	CPPC	P	R	E	H	E	L	V	A	V	P	C	E	G	L	N	N	C	W	F	V	E	G	CPPC	2	1.50205e-05
521	CPPC	P	R	E	H	E	L	V	A	V	P	C	E	G	L	N	N	C	W	F	V	S	A	CPPC	2	1.50205e-05
522	CPPC	P	R	E	H	E	L	V	A	V	P	C	E	G	L	N	N	C	W	F	L	E	A	CPPC	2	1.50205e-05
523	CPPC	P	R	E	H	E	L	V	A	V	P	C	E	G	L	N	N	C	F	M	V	L	A	CPPC	2	1.50205e-05
524	CPPC	P	R	E	H	E	L	V	A	V	P	C	E	G	L	N	S	C	W	F	V	E	A	CPPC	2	1.50205e-05
525	CPPC	P	R	E	H	E	L	V	A	V	P	C	E	G	L	N	Y	C	W	F	V	E	A	CPPC	2	1.50205e-05
526	CPPC	P	R	E	H	E	L	V	A	V	P	C	E	G	L	L	N	C	W	K	V	E	A	CPPC	2	1.50205e-05
527	CPPC	P	R	E	H	E	L	V	A	V	P	C	E	V	E	M	K	C	W	V	V	E	R	CPPC	2	1.50205e-05
528	CPPC	P	R	E	H	E	L	V	A	V	P	C	E	V	E	M	N	C	W	F	V	E	A	CPPC	2	1.50205e-05
529	CPPC	P	R	E	H	E	L	V	A	V	P	C	E	V	E	M	T	C	W	V	V	E	R	CPPC	2	1.50205e-05
530	CPPC	P	R	E	H	E	L	V	A	V	P	C	E	Y	N	K	E	C	I	W	L	R	L	CPPC	2	1.50205e-05
531	CPPC	P	R	E	H	E	L	V	A	V	P	C	E	Y	R	V	S	C	E	V	A	L	T	CPPC	2	1.50205e-05
532	CPPC	P	R	E	H	E	L	V	A	V	P	C	E	W	S	Q	N	C	W	V	I	R	L	CPPC	2	1.50205e-05
533	CPPC	P	R	E	H	E	L	V	A	V	P	C	E	F	E	F	R	C	W	V	R	E	M	CPPC	2	1.50205e-05
534	CPPC	P	R	E	H	E	L	V	A	V	P	C	Y	E	W	V	Y	C	V	S	E	A	T	CPPC	2	1.50205e-05
535	CPPC	P	R	E	H	E	L	V	A	V	P	C	Y	W	P	W	E	C	A	M	L	Q	Y	CPPC	2	1.50205e-05
536	CPPC	P	R	E	H	E	L	V	A	V	P	C	Y	W	W	P	F	C	G	T	I	E	L	CPPC	2	1.50205e-05
537	CPPC	P	R	E	H	E	L	V	A	V	P	C	S	L	A	M	*	C	L	V	Q	E	M	CPPC	2	1.50205e-05
538	CPPC	P	R	E	H	E	L	V	A	V	P	C	S	G	L	N	N	C	W	V	V	E	A	CPPC	2	1.50205e-05
539	CPPC	P	R	E	H	E	L	V	A	V	P	C	S	V	E	P	N	C	W	F	L	V	S	CPPC	2	1.50205e-05
540	CPPC	P	R	E	H	E	L	V	A	V	P	C	S	Y	E	L	N	C	W	E	I	K	R	CPPC	2	1.50205e-05
541	CPPC	P	R	E	H	E	L	V	A	V	P	C	S	F	R	E	F	C	Y	Y	L	Y	I	CPPC	2	1.50205e-05
542	CPPC	P	R	E	H	E	L	V	A	V	P	C	S	K	V	Q	K	C	W	E	L	V	A	CPPC	2	1.50205e-05
543	CPPC	P	R	E	H	E	L	V	A	V	P	C	S	K	V	Q	N	C	W	E	V	V	A	CPPC	2	1.50205e-05
544	CPPC	P	R	E	H	E	L	V	A	V	P	C	S	K	V	Q	N	C	W	S	L	V	A	CPPC	2	1.50205e-05
545	CPPC	P	R	E	H	E	L	V	A	V	P	C	S	N	*	M	W	C	G	E	L	E	G	CPPC	2	1.50205e-05
546	CPPC	P	R	E	H	E	L	V	A	V	P	C	S	I	A	R	K	C	H	E	L	V	E	CPPC	2	1.50205e-05
547	CPPC	P	R	E	H	E	L	V	A	V	P	C	S	H	L	R	T	C	S	S	Q	W	E	CPPC	2	1.50205e-05
548	CPPC	P	R	E	H	E	L	V	A	V	P	C	S	R	E	P	N	C	W	F	V	E	A	CPPC	2	1.50205e-05
549	CPPC	P	R	E	H	E	L	V	A	V	P	C	S	E	R	R	N	C	W	L	V	E	P	CPPC	2	1.50205e-05
550	CPPC	P	R	E	H	E	L	V	A	V	P	C	S	E	P	T	Q	C	E	E	R	V	E	CPPC	2	1.50205e-05
551	CPPC	P	R	E	H	E	L	V	A	V	P	C	S	F	E	S	N	C	W	E	I	K	R	CPPC	2	1.50205e-05
552	CPPC	P	R	E	H	E	L	V	A	V	P	C	W	R	N	Y	E	C	T	R	F	D	R	CPPC	2	1.50205e-05
553	CPPC	P	R	E	H	E	L	V	A	V	P	C	W	R	R	F	Y	C	E	Y	V	V	L	CPPC	2	1.50205e-05
554	CPPC	P	R	E	H	E	L	V	A	V	P	C	W	L	S	L	E	C	N	R	R	F	R	CPPC	2	1.50205e-05
555	CPPC	P	R	E	H	E	L	V	A	V	P	C	W	G	L	L	L	C	Q	R	V	L	E	CPPC	2	1.50205e-05
556	CPPC	P	R	E	H	E	L	V	A	V	P	C	W	F	P	I	E	C	K	Y	W	L	P	CPPC	2	1.50205e-05
557	CPPC	P	R	E	H	E	L	V	A	V	P	C	W	F	A	E	I	C	M	A	Y	I	E	CPPC	2	1.50205e-05
558	CPPC	P	R	E	H	E	L	V	A	V	P	C	L	A	E	S	E	C	W	Y	L	V	Y	CPPC	2	1.50205e-05
559	CPPC	P	R	E	H	E	L	V	A	V	P	C	L	S	R	A	N	C	G	W	I	E	R	CPPC	2	1.50205e-05
560	CPPC	P	R	E	H	E	L	V	A	V	P	C	L	S	R	A	N	C	W	W	T	E	R	CPPC	2	1.50205e-05
561	CPPC	P	R	E	H	E	L	V	A	V	P	C	L	S	R	A	N	C	W	W	I	Q	R	CPPC	2	1.50205e-05
562	CPPC	P	R	E	H	E	L	V	A	V	P	C	F	R	S	S	R	C	P	E	W	E	P	CPPC	2	1.50205e-05
563	CPPC	P	R	E	H	E	L	V	A	V	P	C	F	L	S	R	V	*	S	V	N	L	I	CPPC	2	1.50205e-05
564	CPPC	P	R	E	H	E	L	V	A	V	P	C	F	L	A	E	E	C	D	V	S	S	F	CPPC	2	1.50205e-05
565	CPPC	P	R	E	H	E	L	V	A	V	P	C	A	E	P	M	E	C	Y	V	V	I	I	CPPC	1	7.51027e-06
566	CPPC	P	R	E	H	E	L	V	A	V	P	C	E	W	R	S	R	C	W	G	E	I	T	CPPC	1	7.51027e-06
567	CPPC	P	R	E	H	E	L	V	A	V	P	C	K	S	L	W	L	C	W	R	E	P	S	CPPC	1	7.51027e-06
568	CPPC	P	R	E	H	E	L	V	A	V	P	C	K	G	L	N	N	C	W	F	V	E	A	CPPC	1	7.51027e-06
569	CPPC	P	R	E	H	E	L	V	A	V	P	C	K	E	M	L	L	C	K	L	E	P	Y	CPPC	1	7.51027e-06
570	CPPC	P	R	E	H	E	L	V	A	V	P	C	K	E	E	A	N	C	R	M	V	T	P	CPPC	1	7.51027e-06
571	CPPC	P	R	E	H	E	L	V	A	V	P	C	N	R	E	W	R	C	S	L	G	V	H	CPPC	1	7.51027e-06
572	CPPC	P	R	E	H	E	L	V	A	V	P	C	N	R	R	E	R	C	E	P	W	G	N	CPPC	1	7.51027e-06
573	CPPC	P	R	E	H	E	L	V	A	V	P	C	N	R	D	T	N	C	W	W	I	L	E	CPPC	1	7.51027e-06
574	CPPC	P	R	E	H	E	L	V	A	V	P	C	N	L	E	P	W	C	S	E	R	T	K	CPPC	1	7.51027e-06
575	CPPC	P	R	E	H	E	L	V	A	V	P	C	N	A	E	K	S	C	G	Y	E	Y	S	CPPC	1	7.51027e-06
576	CPPC	P	R	E	H	E	L	V	A	V	P	C	N	A	E	R	S	C	Y	P	P	M	H	CPPC	1	7.51027e-06
577	CPPC	P	R	E	H	E	L	V	A	V	P	C	N	G	M	N	N	C	W	H	V	N	R	CPPC	1	7.51027e-06
578	CPPC	P	R	E	H	E	L	V	A	V	P	C	N	E	R	V	E	C	P	T	E	Y	F	CPPC	1	7.51027e-06
579	CPPC	P	R	E	H	E	L	V	A	V	P	C	N	F	Q	Y	E	C	R	V	G	Y	S	CPPC	1	7.51027e-06
580	CPPC	P	R	E	H	E	L	V	A	V	P	C	T	I	L	A	L	C	V	E	F	R	I	CPPC	1	7.51027e-06
581	CPPC	P	R	E	H	E	L	V	A	V	P	C	T	R	P	W	E	C	R	P	M	S	M	CPPC	1	7.51027e-06
582	CPPC	P	R	E	H	E	L	V	A	V	P	C	T	L	S	R	L	C	P	P	E	R	G	CPPC	1	7.51027e-06
583	CPPC	P	R	E	H	E	L	V	A	V	P	C	T	L	S	R	A	C	Y	E	W	T	W	CPPC	1	7.51027e-06
584	CPPC	P	R	E	H	E	L	V	A	V	P	C	T	E	K	G	E	C	A	A	F	L	D	CPPC	1	7.51027e-06
585	CPPC	P	R	E	H	E	L	V	A	V	P	C	T	E	R	S	K	C	W	V	V	S	P	CPPC	1	7.51027e-06
586	CPPC	P	R	E	H	E	L	V	A	V	P	C	T	E	R	S	N	G	W	V	V	S	P	CPPC	1	7.51027e-06
587	CPPC	P	R	E	H	E	L	V	A	V	P	C	T	E	R	S	N	C	W	V	V	S	H	CPPC	1	7.51027e-06
588	CPPC	P	R	E	H	E	L	V	A	V	P	C	T	E	R	S	N	C	W	V	V	S	A	CPPC	1	7.51027e-06
589	CPPC	P	R	E	H	E	L	V	A	V	P	C	T	E	R	S	T	C	W	V	V	S	P	CPPC	1	7.51027e-06
590	CPPC	P	R	E	H	E	L	V	A	V	P	C	T	E	R	S	H	C	W	V	V	S	P	CPPC	1	7.51027e-06
591	CPPC	P	R	E	H	E	L	V	A	V	P	C	T	Y	W	L	F	C	R	R	E	E	H	CPPC	1	7.51027e-06
592	CPPC	P	R	E	H	E	L	V	A	V	P	C	T	S	K	H	N	C	W	L	L	I	S	CPPC	1	7.51027e-06
593	CPPC	P	R	E	H	E	L	V	A	V	P	C	T	S	E	H	N	C	R	L	L	I	S	CPPC	1	7.51027e-06
594	CPPC	P	R	E	H	E	L	V	A	V	P	C	T	K	L	F	I	C	A	T	W	V	E	CPPC	1	7.51027e-06
595	CPPC	P	R	E	H	E	L	V	A	V	P	C	T	K	V	Q	N	C	W	E	L	V	A	CPPC	1	7.51027e-06
596	CPPC	P	R	E	H	E	L	V	A	V	P	C	T	H	T	A	N	C	W	V	V	E	F	CPPC	1	7.51027e-06
597	CPPC	P	R	E	H	E	L	V	A	V	P	C	T	R	R	G	E	C	A	A	L	L	W	CPPC	1	7.51027e-06
598	CPPC	P	R	E	H	E	L	V	A	V	P	C	T	D	R	A	E	C	W	I	L	L	F	CPPC	1	7.51027e-06
599	CPPC	P	R	E	H	E	L	V	A	V	P	C	T	W	T	G	N	C	T	E	E	M	F	CPPC	1	7.51027e-06
600	CPPC	P	R	E	H	E	L	V	A	V	P	C	R	K	E	S	M	C	S	P	V	W	F	CPPC	1	7.51027e-06
601	CPPC	P	R	E	H	E	L	V	A	V	P	C	R	M	F	S	P	C	P	E	Q	R	F	CPPC	1	7.51027e-06
602	CPPC	P	R	E	H	E	L	V	A	V	P	C	R	Q	V	G	E	C	R	R	R	A	S	CPPC	1	7.51027e-06
603	CPPC	P	R	E	H	E	L	V	A	V	P	C	R	P	V	K	W	C	E	Y	S	L	L	CPPC	1	7.51027e-06
604	CPPC	P	R	E	H	E	L	V	A	V	P	C	R	L	V	L	L	C	H	L	R	Q	E	CPPC	1	7.51027e-06
605	CPPC	P	R	E	H	E	L	V	A	V	P	C	R	D	Q	S	Q	C	E	P	D	P	A	CPPC	1	7.51027e-06
606	CPPC	P	R	E	H	E	L	V	A	V	P	C	R	G	H	P	L	C	Y	P	M	Y	S	CPPC	1	7.51027e-06
607	CPPC	P	R	E	H	E	L	V	A	V	P	C	R	V	L	V	E	C	W	V	I	I	R	CPPC	1	7.51027e-06
608	CPPC	P	R	E	H	E	L	V	A	V	P	C	R	E	R	V	I	C	S	T	Q	L	L	CPPC	1	7.51027e-06
609	CPPC	P	R	E	H	E	L	V	A	V	P	C	S	N	R	I	K	C	W	E	L	I	A	CPPC	1	7.51027e-06
610	CPPC	P	R	E	H	E	L	V	A	V	P	C	S	N	R	I	N	W	W	E	L	I	A	CPPC	1	7.51027e-06
611	CPPC	P	R	E	H	E	L	V	A	V	P	C	S	N	R	I	N	C	W	E	F	I	A	CPPC	1	7.51027e-06
612	CPPC	P	R	E	H	E	L	V	A	V	P	C	S	N	R	I	N	C	W	Y	L	Q	V	CPPC	1	7.51027e-06
613	CPPC	P	R	E	H	E	L	V	A	V	P	C	S	N	R	I	N	C	W	F	V	E	A	CPPC	1	7.51027e-06
614	CPPC	P	R	E	H	E	L	V	A	V	P	C	S	Q	V	D	A	C	A	R	L	S	E	CPPC	1	7.51027e-06
615	CPPC	P	R	E	H	E	L	V	A	V	P	C	S	P	R	G	E	C	S	L	A	S	F	CPPC	1	7.51027e-06
616	CPPC	P	R	E	H	E	L	V	A	V	P	C	S	A	Q	V	A	C	E	S	T	E	D	CPPC	1	7.51027e-06
617	CPPC	P	R	E	H	E	L	V	A	V	P	C	S	V	Q	Y	E	C	W	V	L	T	I	CPPC	1	7.51027e-06
618	CPPC	P	R	E	H	E	L	V	A	V	P	C	M	S	G	T	P	C	P	A	F	G	E	CPPC	1	7.51027e-06
619	CPPC	P	R	E	H	E	L	V	A	V	P	C	M	L	R	E	N	C	W	A	L	V	Y	CPPC	1	7.51027e-06
620	CPPC	P	R	E	H	E	L	V	A	V	P	C	M	G	T	R	H	C	W	E	L	I	A	CPPC	1	7.51027e-06
621	CPPC	P	R	E	H	E	L	V	A	V	P	C	M	G	T	S	K	C	W	E	L	I	A	CPPC	1	7.51027e-06
622	CPPC	P	R	E	H	E	L	V	A	V	P	C	M	V	L	H	F	Y	I	P	P	M	E	CPPC	1	7.51027e-06
623	CPPC	P	R	E	H	E	L	V	A	V	P	C	I	N	R	I	N	C	W	E	L	I	A	CPPC	1	7.51027e-06
624	CPPC	P	R	E	H	E	L	V	A	V	P	C	I	T	E	S	N	C	W	E	I	K	R	CPPC	1	7.51027e-06
625	CPPC	P	R	E	H	E	L	V	A	V	P	C	I	P	R	R	F	C	W	E	R	A	G	CPPC	1	7.51027e-06
626	CPPC	P	R	E	H	E	L	V	A	V	P	C	I	P	W	K	P	C	L	G	I	R	E	CPPC	1	7.51027e-06
627	CPPC	P	R	E	H	E	L	V	A	V	P	C	I	P	W	R	W	C	I	V	V	V	E	CPPC	1	7.51027e-06
628	CPPC	P	R	E	H	E	L	V	A	V	P	C	I	E	W	T	N	C	F	H	V	I	S	CPPC	1	7.51027e-06
629	CPPC	P	R	E	H	E	L	V	A	V	P	C	I	E	F	V	E	C	R	S	Q	L	K	CPPC	1	7.51027e-06
630	CPPC	P	R	E	H	E	L	V	A	V	P	C	I	S	R	P	N	C	W	R	I	G	A	CPPC	1	7.51027e-06
631	CPPC	P	R	E	H	E	L	V	A	V	P	C	I	F	R	G	S	C	Y	P	S	N	N	CPPC	1	7.51027e-06
632	CPPC	P	R	E	H	E	L	V	A	V	P	C	Q	T	V	R	N	C	R	H	I	M	E	CPPC	1	7.51027e-06
633	CPPC	P	R	E	H	E	L	V	A	V	P	C	Q	T	V	R	N	C	W	H	M	M	E	CPPC	1	7.51027e-06
634	CPPC	P	R	E	H	E	L	V	A	V	P	C	Q	T	V	R	N	C	W	H	I	R	E	CPPC	1	7.51027e-06
635	CPPC	P	R	E	H	E	L	V	A	V	P	C	Q	T	V	R	N	C	W	H	I	I	E	CPPC	1	7.51027e-06
636	CPPC	P	R	E	H	E	L	V	A	V	P	C	Q	T	V	R	N	C	W	H	L	M	E	CPPC	1	7.51027e-06
637	CPPC	P	R	E	H	E	L	V	A	V	P	C	Q	T	V	R	N	C	W	H	F	M	E	CPPC	1	7.51027e-06
638	CPPC	P	R	E	H	E	L	V	A	V	P	C	Q	T	V	R	N	C	W	P	I	M	E	CPPC	1	7.51027e-06
639	CPPC	P	R	E	H	E	L	V	A	V	P	C	Q	T	V	R	N	C	W	F	V	E	A	CPPC	1	7.51027e-06
640	CPPC	P	R	E	H	E	L	V	A	V	P	C	Q	T	V	R	T	C	W	E	L	V	A	CPPC	1	7.51027e-06
641	CPPC	P	R	E	H	E	L	V	A	V	P	C	Q	T	V	W	N	C	W	H	I	M	E	CPPC	1	7.51027e-06
642	CPPC	P	R	E	H	E	L	V	A	V	P	C	Q	T	K	R	N	C	W	T	I	T	E	CPPC	1	7.51027e-06
643	CPPC	P	R	E	H	E	L	V	A	V	P	C	Q	T	Q	R	T	C	W	T	I	T	E	CPPC	1	7.51027e-06
644	CPPC	P	R	E	H	E	L	V	A	V	P	C	Q	R	E	P	N	W	Y	V	I	S	R	CPPC	1	7.51027e-06
645	CPPC	P	R	E	H	E	L	V	A	V	P	C	Q	R	E	P	N	C	E	V	I	S	R	CPPC	1	7.51027e-06
646	CPPC	P	R	E	H	E	L	V	A	V	P	C	Q	R	E	P	N	C	W	A	L	T	R	CPPC	1	7.51027e-06
647	CPPC	P	R	E	H	E	L	V	A	V	P	C	Q	L	S	E	W	C	W	A	L	V	Y	CPPC	1	7.51027e-06
648	CPPC	P	R	E	H	E	L	V	A	V	P	C	Q	A	R	L	N	C	W	R	V	I	E	CPPC	1	7.51027e-06
649	CPPC	P	R	E	H	E	L	V	A	V	P	C	Q	G	W	K	E	C	Q	K	T	R	F	CPPC	1	7.51027e-06
650	CPPC	P	R	E	H	E	L	V	A	V	P	C	Q	Y	K	G	A	C	L	R	L	E	E	CPPC	1	7.51027e-06
651	CPPC	P	R	E	H	E	L	V	A	V	P	C	H	K	L	A	N	C	W	H	L	R	E	CPPC	1	7.51027e-06
652	CPPC	P	R	E	H	E	L	V	A	V	P	C	H	K	L	P	S	C	H	E	Y	E	V	CPPC	1	7.51027e-06
653	CPPC	P	R	E	H	E	L	V	A	V	P	C	H	N	L	A	N	C	R	H	L	R	E	CPPC	1	7.51027e-06
654	CPPC	P	R	E	H	E	L	V	A	V	P	C	H	N	L	A	N	C	E	H	L	R	E	CPPC	1	7.51027e-06
655	CPPC	P	R	E	H	E	L	V	A	V	P	C	H	N	L	A	N	C	W	H	S	R	E	CPPC	1	7.51027e-06
656	CPPC	P	R	E	H	E	L	V	A	V	P	C	H	N	L	A	T	C	W	H	L	R	E	CPPC	1	7.51027e-06
657	CPPC	P	R	E	H	E	L	V	A	V	P	C	H	N	L	V	N	C	W	H	L	R	E	CPPC	1	7.51027e-06
658	CPPC	P	R	E	H	E	L	V	A	V	P	C	H	S	R	E	N	C	W	T	I	S	E	CPPC	1	7.51027e-06
659	CPPC	P	R	E	H	E	L	V	A	V	P	C	H	I	H	A	N	C	W	L	W	L	E	CPPC	1	7.51027e-06
660	CPPC	P	R	E	H	E	L	V	A	V	P	C	H	Q	T	L	S	C	P	T	G	T	M	CPPC	1	7.51027e-06
661	CPPC	P	R	E	H	E	L	V	A	V	P	C	H	H	R	E	W	C	R	G	I	L	V	CPPC	1	7.51027e-06
662	CPPC	P	R	E	H	E	L	V	A	V	P	C	H	R	N	M	E	C	N	G	S	K	E	CPPC	1	7.51027e-06
663	CPPC	P	R	E	H	E	L	V	A	V	P	C	H	R	P	H	L	C	*	V	P	G	Q	CPPC	1	7.51027e-06
664	CPPC	P	R	E	H	E	L	V	A	V	P	C	H	D	A	M	P	C	R	A	E	N	E	CPPC	1	7.51027e-06
665	CPPC	P	R	E	H	E	L	V	A	V	P	C	H	A	E	Q	N	C	W	R	G	L	H	CPPC	1	7.51027e-06
666	CPPC	P	R	E	H	E	L	V	A	V	P	C	H	A	E	Q	N	C	W	Y	L	Q	V	CPPC	1	7.51027e-06
667	CPPC	P	R	E	H	E	L	V	A	V	P	C	H	A	E	Q	T	C	W	R	V	L	H	CPPC	1	7.51027e-06
668	CPPC	P	R	E	H	E	L	V	A	V	P	C	H	A	E	R	N	C	W	R	V	L	H	CPPC	1	7.51027e-06
669	CPPC	P	R	E	H	E	L	V	A	V	P	C	H	F	A	W	N	C	W	R	L	E	E	CPPC	1	7.51027e-06
670	CPPC	P	R	E	H	E	L	V	A	V	P	C	P	K	G	A	E	C	W	L	L	I	I	CPPC	1	7.51027e-06
671	CPPC	P	R	E	H	E	L	V	A	V	P	C	P	T	Q	L	E	C	F	A	L	V	H	CPPC	1	7.51027e-06
672	CPPC	P	R	E	H	E	L	V	A	V	P	C	P	T	R	P	N	C	H	V	V	E	R	CPPC	1	7.51027e-06
673	CPPC	P	R	E	H	E	L	V	A	V	P	C	P	T	R	P	N	C	Y	V	A	E	R	CPPC	1	7.51027e-06
674	CPPC	P	R	E	H	E	L	V	A	V	P	C	P	T	R	P	N	C	Y	V	G	E	R	CPPC	1	7.51027e-06
675	CPPC	P	R	E	H	E	L	V	A	V	P	C	P	T	R	P	N	C	Y	V	V	E	L	CPPC	1	7.51027e-06
676	CPPC	P	R	E	H	E	L	V	A	V	P	C	P	T	R	P	N	C	Y	V	V	E	W	CPPC	1	7.51027e-06
677	CPPC	P	R	E	H	E	L	V	A	V	P	C	P	T	R	P	N	C	Y	L	V	E	R	CPPC	1	7.51027e-06
678	CPPC	P	R	E	H	E	L	V	A	V	P	C	P	T	R	P	Y	C	Y	V	V	E	R	CPPC	1	7.51027e-06
679	CPPC	P	R	E	H	E	L	V	A	V	P	C	P	T	R	L	N	C	Y	V	V	E	R	CPPC	1	7.51027e-06
680	CPPC	P	R	E	H	E	L	V	A	V	P	C	P	T	W	P	N	C	Y	V	V	E	R	CPPC	1	7.51027e-06
681	CPPC	P	R	E	H	E	L	V	A	V	P	C	P	I	R	R	N	C	W	V	L	Q	A	CPPC	1	7.51027e-06
682	CPPC	P	R	E	H	E	L	V	A	V	P	C	P	H	K	A	N	W	W	V	V	S	E	CPPC	1	7.51027e-06
683	CPPC	P	R	E	H	E	L	V	A	V	P	C	P	H	Q	A	N	C	W	V	V	S	E	CPPC	1	7.51027e-06
684	CPPC	P	R	E	H	E	L	V	A	V	P	C	P	P	W	Y	S	C	S	V	L	V	T	CPPC	1	7.51027e-06
685	CPPC	P	R	E	H	E	L	V	A	V	P	C	P	R	S	N	W	C	E	L	E	W	K	CPPC	1	7.51027e-06
686	CPPC	P	R	E	H	E	L	V	A	V	P	C	P	E	F	R	R	C	*	R	E	G	E	CPPC	1	7.51027e-06
687	CPPC	P	R	E	H	E	L	V	A	V	P	C	P	D	S	E	L	C	I	T	P	G	E	CPPC	1	7.51027e-06
688	CPPC	P	R	E	H	E	L	V	A	V	P	C	P	A	R	R	N	C	W	N	V	I	E	CPPC	1	7.51027e-06
689	CPPC	P	R	E	H	E	L	V	A	V	P	C	P	A	R	L	N	C	R	N	V	I	E	CPPC	1	7.51027e-06
690	CPPC	P	R	E	H	E	L	V	A	V	P	C	P	A	R	L	N	C	W	N	I	I	E	CPPC	1	7.51027e-06
691	CPPC	P	R	E	H	E	L	V	A	V	P	C	P	A	R	L	N	C	W	N	V	M	E	CPPC	1	7.51027e-06
692	CPPC	P	R	E	H	E	L	V	A	V	P	C	P	A	R	L	N	C	W	N	V	I	Y	CPPC	2	1.50205e-05
693	CPPC	P	R	E	H	E	L	V	A	V	P	C	P	A	R	L	N	C	W	N	F	I	E	CPPC	1	7.51027e-06
694	CPPC	P	R	E	H	E	L	V	A	V	P	C	P	A	R	L	N	C	W	R	I	E	L	CPPC	1	7.51027e-06
695	CPPC	P	R	E	H	E	L	V	A	V	P	C	P	A	R	L	N	C	W	S	V	I	E	CPPC	1	7.51027e-06
696	CPPC	P	R	E	H	E	L	V	A	V	P	C	P	A	R	L	N	C	W	I	V	R	K	CPPC	1	7.51027e-06
697	CPPC	P	R	E	H	E	L	V	A	V	P	C	P	A	R	L	N	C	W	D	V	I	E	CPPC	1	7.51027e-06
698	CPPC	P	R	E	H	E	L	V	A	V	P	C	P	A	R	L	Y	C	W	N	V	I	E	CPPC	1	7.51027e-06
699	CPPC	P	R	E	H	E	L	V	A	V	P	C	P	A	R	L	N	C	W	R	V	I	E	CPPC	1	7.51027e-06
700	CPPC	P	R	E	H	E	L	V	A	V	P	C	P	A	E	P	K	C	Y	L	V	L	A	CPPC	1	7.51027e-06
701	CPPC	P	R	E	H	E	L	V	A	V	P	C	P	G	T	E	N	C	W	T	V	L	E	CPPC	1	7.51027e-06
702	CPPC	P	R	E	H	E	L	V	A	V	P	C	P	G	T	A	N	C	W	Y	V	R	R	CPPC	1	7.51027e-06
703	CPPC	P	R	E	H	E	L	V	A	V	P	C	P	G	Q	E	N	C	W	N	V	I	E	CPPC	1	7.51027e-06
704	CPPC	P	R	E	H	E	L	V	A	V	P	C	P	V	R	L	N	C	W	N	V	I	E	CPPC	1	7.51027e-06
705	CPPC	P	R	E	H	E	L	V	A	V	P	C	P	E	L	R	N	C	Y	I	V	K	R	CPPC	1	7.51027e-06
706	CPPC	P	R	E	H	E	L	V	A	V	P	C	P	E	F	S	N	C	Y	I	V	K	R	CPPC	1	7.51027e-06
707	CPPC	P	R	E	H	E	L	V	A	V	P	C	P	E	F	R	N	C	Y	S	V	K	R	CPPC	1	7.51027e-06
708	CPPC	P	R	E	H	E	L	V	A	V	P	C	P	E	F	R	N	C	Y	I	V	K	L	CPPC	1	7.51027e-06
709	CPPC	P	R	E	H	E	L	V	A	V	P	C	P	E	F	R	N	C	Y	I	V	M	R	CPPC	1	7.51027e-06
710	CPPC	P	R	E	H	E	L	V	A	V	P	C	P	E	F	R	N	C	Y	I	V	E	R	CPPC	1	7.51027e-06
711	CPPC	P	R	E	H	E	L	V	A	V	P	C	P	E	F	R	N	C	W	V	V	E	R	CPPC	1	7.51027e-06
712	CPPC	P	R	E	H	E	L	V	A	V	P	C	P	E	F	R	S	C	Y	I	V	K	R	CPPC	1	7.51027e-06
713	CPPC	P	R	E	H	E	L	V	A	V	P	C	P	S	S	W	Y	C	R	P	P	Y	E	CPPC	1	7.51027e-06
714	CPPC	P	R	E	H	E	L	V	A	V	P	C	P	W	K	G	E	C	R	V	H	V	L	CPPC	1	7.51027e-06
715	CPPC	P	R	E	H	E	L	V	A	V	P	C	P	W	F	R	N	C	Y	I	V	K	R	CPPC	1	7.51027e-06
716	CPPC	P	R	E	H	E	L	V	A	V	P	C	P	F	R	K	N	S	W	S	L	E	K	CPPC	1	7.51027e-06
717	CPPC	P	R	E	H	E	L	V	A	V	P	C	P	F	R	K	N	C	W	S	W	E	K	CPPC	1	7.51027e-06
718	CPPC	P	R	E	H	E	L	V	A	V	P	C	P	F	R	K	N	C	W	S	L	E	N	CPPC	1	7.51027e-06
719	CPPC	P	R	E	H	E	L	V	A	V	P	C	P	F	R	K	S	C	W	S	L	E	K	CPPC	1	7.51027e-06
720	CPPC	P	R	E	H	E	L	V	A	V	P	C	P	N	N	V	E	C	W	E	I	T	V	CPPC	1	7.51027e-06
721	CPPC	P	R	E	H	E	L	V	A	V	P	C	P	S	E	K	E	C	H	E	H	P	E	CPPC	1	7.51027e-06
722	CPPC	P	R	E	H	E	L	V	A	V	P	C	P	I	V	L	S	C	N	E	P	V	F	CPPC	1	7.51027e-06
723	CPPC	P	R	E	H	E	L	V	A	V	P	C	P	R	P	A	*	C	G	V	Q	P	K	CPPC	1	7.51027e-06
724	CPPC	P	R	E	H	E	L	V	A	V	P	C	P	R	S	R	S	C	H	S	A	K	W	CPPC	1	7.51027e-06
725	CPPC	P	R	E	H	E	L	V	A	V	P	C	P	E	H	A	N	C	Y	E	V	K	W	CPPC	1	7.51027e-06
726	CPPC	P	R	E	H	E	L	V	A	V	P	C	P	A	R	E	H	C	W	A	L	E	P	CPPC	1	7.51027e-06
727	CPPC	P	R	E	H	E	L	V	A	V	P	C	P	A	R	A	N	C	W	A	L	E	P	CPPC	1	7.51027e-06
728	CPPC	P	R	E	H	E	L	V	A	V	P	C	P	A	R	R	E	C	W	Y	V	Y	R	CPPC	1	7.51027e-06
729	CPPC	P	R	E	H	E	L	V	A	V	P	C	P	A	W	E	N	C	W	A	L	E	P	CPPC	1	7.51027e-06
730	CPPC	P	R	E	H	E	L	V	A	V	P	C	P	V	L	G	H	C	L	W	R	G	E	CPPC	1	7.51027e-06
731	CPPC	P	R	E	H	E	L	V	A	V	P	C	P	E	R	R	K	C	W	L	V	E	P	CPPC	1	7.51027e-06
732	CPPC	P	R	E	H	E	L	V	A	V	P	C	P	E	R	R	N	C	W	E	I	K	R	CPPC	1	7.51027e-06
733	CPPC	P	R	E	H	E	L	V	A	V	P	C	P	E	R	R	N	C	W	A	L	T	R	CPPC	1	7.51027e-06
734	CPPC	P	R	E	H	E	L	V	A	V	P	C	P	E	R	R	S	C	S	R	P	M	V	CPPC	1	7.51027e-06
735	CPPC	P	R	E	H	E	L	V	A	V	P	C	P	E	D	F	E	C	W	L	V	V	I	CPPC	1	7.51027e-06
736	CPPC	P	R	E	H	E	L	V	A	V	P	C	P	Y	L	R	N	C	W	E	L	L	Y	CPPC	1	7.51027e-06
737	CPPC	P	R	E	H	E	L	V	A	V	P	C	P	Y	S	G	R	C	L	T	G	E	E	CPPC	1	7.51027e-06
738	CPPC	P	R	E	H	E	L	V	A	V	P	C	P	F	T	R	T	C	W	R	I	Y	E	CPPC	1	7.51027e-06
739	CPPC	P	R	E	H	E	L	V	A	V	P	C	P	F	V	Q	N	C	W	F	V	E	A	CPPC	1	7.51027e-06
740	CPPC	P	R	E	H	E	L	V	A	V	P	C	R	N	S	T	E	C	V	E	E	P	G	CPPC	1	7.51027e-06
741	CPPC	P	R	E	H	E	L	V	A	V	P	C	R	Q	R	D	K	C	W	W	V	S	E	CPPC	1	7.51027e-06
742	CPPC	P	R	E	H	E	L	V	A	V	P	C	R	Q	R	A	N	C	W	W	V	S	E	CPPC	1	7.51027e-06
743	CPPC	P	R	E	H	E	L	V	A	V	P	C	R	P	R	R	L	C	E	L	S	G	S	CPPC	1	7.51027e-06
744	CPPC	P	R	E	H	E	L	V	A	V	P	C	R	D	T	E	A	C	R	E	H	Y	R	CPPC	1	7.51027e-06
745	CPPC	P	R	E	H	E	L	V	A	V	P	C	R	D	P	D	P	C	V	M	S	K	E	CPPC	1	7.51027e-06
746	CPPC	P	R	E	H	E	L	V	A	V	P	C	R	A	R	L	N	C	R	R	V	I	E	CPPC	2	1.50205e-05
747	CPPC	P	R	E	H	E	L	V	A	V	P	C	R	A	R	L	N	C	W	R	V	S	E	CPPC	1	7.51027e-06
748	CPPC	P	R	E	H	E	L	V	A	V	P	C	R	A	R	L	N	C	W	R	V	I	K	CPPC	1	7.51027e-06
749	CPPC	P	R	E	H	E	L	V	A	V	P	C	R	A	R	L	N	C	W	R	V	I	Y	CPPC	1	7.51027e-06
750	CPPC	P	R	E	H	E	L	V	A	V	P	C	R	A	R	L	N	C	W	R	V	I	S	CPPC	1	7.51027e-06
751	CPPC	P	R	E	H	E	L	V	A	V	P	C	R	A	R	L	N	C	W	L	V	I	E	CPPC	1	7.51027e-06
752	CPPC	P	R	E	H	E	L	V	A	V	P	C	R	A	R	L	Y	C	W	R	V	I	E	CPPC	1	7.51027e-06
753	CPPC	P	R	E	H	E	L	V	A	V	P	C	R	A	R	F	N	C	W	R	V	I	E	CPPC	1	7.51027e-06
754	CPPC	P	R	E	H	E	L	V	A	V	P	C	R	S	R	L	N	C	W	R	V	I	E	CPPC	1	7.51027e-06
755	CPPC	P	R	E	H	E	L	V	A	V	P	C	R	S	W	Y	R	C	I	L	S	V	W	CPPC	1	7.51027e-06
756	CPPC	P	R	E	H	E	L	V	A	V	P	C	R	F	Y	G	H	C	V	R	A	T	W	CPPC	1	7.51027e-06
757	CPPC	P	R	E	H	E	L	V	A	V	P	C	R	N	L	A	N	C	W	H	L	R	E	CPPC	1	7.51027e-06
758	CPPC	P	R	E	H	E	L	V	A	V	P	C	R	R	A	E	N	C	W	S	I	I	S	CPPC	1	7.51027e-06
759	CPPC	P	R	E	H	E	L	V	A	V	P	C	R	R	A	T	L	C	E	Y	G	S	D	CPPC	1	7.51027e-06
760	CPPC	P	R	E	H	E	L	V	A	V	P	C	R	R	S	E	R	C	N	G	G	M	S	CPPC	1	7.51027e-06
761	CPPC	P	R	E	H	E	L	V	A	V	P	C	R	R	P	R	S	C	R	E	H	T	A	CPPC	1	7.51027e-06
762	CPPC	P	R	E	H	E	L	V	A	V	P	C	R	L	T	P	K	C	W	K	V	M	E	CPPC	1	7.51027e-06
763	CPPC	P	R	E	H	E	L	V	A	V	P	C	R	L	T	P	T	C	W	K	V	R	E	CPPC	1	7.51027e-06
764	CPPC	P	R	E	H	E	L	V	A	V	P	C	R	L	T	L	N	C	W	K	V	M	E	CPPC	1	7.51027e-06
765	CPPC	P	R	E	H	E	L	V	A	V	P	C	R	E	W	G	Y	C	W	R	S	G	W	CPPC	1	7.51027e-06
766	CPPC	P	R	E	H	E	L	V	A	V	P	C	R	A	W	R	Y	C	G	R	K	K	E	CPPC	1	7.51027e-06
767	CPPC	P	R	E	H	E	L	V	A	V	P	C	R	V	P	E	D	C	W	N	N	A	E	CPPC	1	7.51027e-06
768	CPPC	P	R	E	H	E	L	V	A	V	P	C	R	L	F	Y	E	C	R	L	Q	G	V	CPPC	1	7.51027e-06
769	CPPC	P	R	E	H	E	L	V	A	V	P	C	R	F	V	V	S	C	T	L	S	S	E	CPPC	1	7.51027e-06
770	CPPC	P	R	E	H	E	L	V	A	V	P	C	L	N	S	G	E	C	K	S	S	W	W	CPPC	1	7.51027e-06
771	CPPC	P	R	E	H	E	L	V	A	V	P	C	L	T	E	Q	N	C	W	R	L	M	T	CPPC	1	7.51027e-06
772	CPPC	P	R	E	H	E	L	V	A	V	P	C	L	P	R	L	L	C	R	E	L	A	R	CPPC	1	7.51027e-06
773	CPPC	P	R	E	H	E	L	V	A	V	P	C	L	R	N	T	L	C	P	S	E	P	I	CPPC	1	7.51027e-06
774	CPPC	P	R	E	H	E	L	V	A	V	P	C	L	L	E	S	E	C	R	I	P	Y	R	CPPC	1	7.51027e-06
775	CPPC	P	R	E	H	E	L	V	A	V	P	C	L	E	A	R	E	C	E	R	P	R	A	CPPC	1	7.51027e-06
776	CPPC	P	R	E	H	E	L	V	A	V	P	C	L	A	R	L	N	C	W	T	V	I	E	CPPC	1	7.51027e-06
777	CPPC	P	R	E	H	E	L	V	A	V	P	C	L	A	Q	E	S	C	N	P	E	M	F	CPPC	1	7.51027e-06
778	CPPC	P	R	E	H	E	L	V	A	V	P	C	L	F	R	K	N	C	W	S	L	E	K	CPPC	1	7.51027e-06
779	CPPC	P	R	E	H	E	L	V	A	V	P	C	L	T	V	A	T	C	W	Y	I	E	P	CPPC	1	7.51027e-06
780	CPPC	P	R	E	H	E	L	V	A	V	P	C	L	Q	L	L	E	C	L	D	R	D	G	CPPC	1	7.51027e-06
781	CPPC	P	R	E	H	E	L	V	A	V	P	C	L	H	G	K	E	C	P	R	R	E	V	CPPC	1	7.51027e-06
782	CPPC	P	R	E	H	E	L	V	A	V	P	C	L	R	R	G	E	C	R	Y	L	S	T	CPPC	1	7.51027e-06
783	CPPC	P	R	E	H	E	L	V	A	V	P	C	L	R	E	A	E	C	R	R	L	M	T	CPPC	1	7.51027e-06
784	CPPC	P	R	E	H	E	L	V	A	V	P	C	L	L	I	I	E	C	K	L	L	L	R	CPPC	1	7.51027e-06
785	CPPC	P	R	E	H	E	L	V	A	V	P	C	L	E	R	P	N	C	W	Y	L	Q	V	CPPC	1	7.51027e-06
786	CPPC	P	R	E	H	E	L	V	A	V	P	C	L	E	L	P	N	C	W	A	L	T	R	CPPC	1	7.51027e-06
787	CPPC	P	R	E	H	E	L	V	A	V	P	C	L	W	R	W	E	C	L	R	R	R	Y	CPPC	1	7.51027e-06
788	CPPC	P	R	E	H	E	L	V	A	V	P	C	E	N	L	H	P	C	G	A	S	S	W	CPPC	1	7.51027e-06
789	CPPC	P	R	E	H	E	L	V	A	V	P	C	E	R	H	I	N	C	W	S	I	E	A	CPPC	1	7.51027e-06
790	CPPC	P	R	E	H	E	L	V	A	V	P	C	E	R	R	I	K	C	W	S	I	E	A	CPPC	1	7.51027e-06
791	CPPC	P	R	E	H	E	L	V	A	V	P	C	E	E	A	L	N	C	W	S	I	V	E	CPPC	1	7.51027e-06
792	CPPC	P	R	E	H	E	L	V	A	V	P	C	E	G	F	L	K	C	W	V	L	E	S	CPPC	1	7.51027e-06
793	CPPC	P	R	E	H	E	L	V	A	V	P	C	E	G	F	L	N	W	W	V	L	E	S	CPPC	1	7.51027e-06
794	CPPC	P	R	E	H	E	L	V	A	V	P	C	E	G	F	L	N	C	W	E	I	K	R	CPPC	1	7.51027e-06
795	CPPC	P	R	E	H	E	L	V	A	V	P	C	E	G	F	L	N	C	W	A	V	R	E	CPPC	1	7.51027e-06
796	CPPC	P	R	E	H	E	L	V	A	V	P	C	E	G	F	L	N	C	W	V	L	E	Y	CPPC	1	7.51027e-06
797	CPPC	P	R	E	H	E	L	V	A	V	P	C	E	G	F	L	N	C	W	F	V	E	A	CPPC	1	7.51027e-06
798	CPPC	P	R	E	H	E	L	V	A	V	P	C	E	G	F	L	Y	C	W	V	L	E	S	CPPC	1	7.51027e-06
799	CPPC	P	R	E	H	E	L	V	A	V	P	C	E	E	V	V	K	C	W	E	I	V	R	CPPC	1	7.51027e-06
800	CPPC	P	R	E	H	E	L	V	A	V	P	C	E	E	V	V	N	W	W	E	I	V	R	CPPC	1	7.51027e-06
801	CPPC	P	R	E	H	E	L	V	A	V	P	C	E	E	V	V	N	C	W	Q	I	V	R	CPPC	1	7.51027e-06
802	CPPC	P	R	E	H	E	L	V	A	V	P	C	E	E	V	V	N	C	W	E	I	A	R	CPPC	1	7.51027e-06
803	CPPC	P	R	E	H	E	L	V	A	V	P	C	E	S	V	V	N	C	W	E	I	V	R	CPPC	1	7.51027e-06
804	CPPC	P	R	E	H	E	L	V	A	V	P	C	E	S	E	R	N	C	W	E	I	K	R	CPPC	1	7.51027e-06
805	CPPC	P	R	E	H	E	L	V	A	V	P	C	E	S	E	R	Y	C	W	A	L	L	V	CPPC	1	7.51027e-06
806	CPPC	P	R	E	H	E	L	V	A	V	P	C	E	S	E	L	N	C	W	A	L	L	V	CPPC	1	7.51027e-06
807	CPPC	P	R	E	H	E	L	V	A	V	P	C	E	S	E	W	N	C	W	A	L	L	V	CPPC	1	7.51027e-06
808	CPPC	P	R	E	H	E	L	V	A	V	P	C	D	H	H	D	E	C	E	G	Q	W	A	CPPC	1	7.51027e-06
809	CPPC	P	R	E	H	E	L	V	A	V	P	C	D	P	S	*	M	C	V	L	G	T	F	CPPC	1	7.51027e-06
810	CPPC	P	R	E	H	E	L	V	A	V	P	C	D	R	E	E	T	C	W	H	V	V	M	CPPC	1	7.51027e-06
811	CPPC	P	R	E	H	E	L	V	A	V	P	C	D	L	D	S	E	C	K	M	L	T	W	CPPC	1	7.51027e-06
812	CPPC	P	R	E	H	E	L	V	A	V	P	C	D	A	L	T	N	C	W	E	L	V	W	CPPC	1	7.51027e-06
813	CPPC	P	R	E	H	E	L	V	A	V	P	C	D	A	L	P	K	C	W	E	L	V	W	CPPC	1	7.51027e-06
814	CPPC	P	R	E	H	E	L	V	A	V	P	C	D	A	L	P	N	C	W	E	L	V	L	CPPC	1	7.51027e-06
815	CPPC	P	R	E	H	E	L	V	A	V	P	C	D	G	V	P	N	C	W	E	F	R	K	CPPC	1	7.51027e-06
816	CPPC	P	R	E	H	E	L	V	A	V	P	C	D	G	V	P	N	C	W	Y	L	R	K	CPPC	1	7.51027e-06
817	CPPC	P	R	E	H	E	L	V	A	V	P	C	D	G	S	Y	E	C	A	L	*	R	R	CPPC	1	7.51027e-06
818	CPPC	P	R	E	H	E	L	V	A	V	P	C	D	G	V	Q	K	C	M	S	H	R	V	CPPC	1	7.51027e-06
819	CPPC	P	R	E	H	E	L	V	A	V	P	C	D	F	R	P	A	C	G	G	Q	L	E	CPPC	1	7.51027e-06
820	CPPC	P	R	E	H	E	L	V	A	V	P	C	A	R	G	E	H	C	L	S	D	F	E	CPPC	1	7.51027e-06
821	CPPC	P	R	E	H	E	L	V	A	V	P	C	A	S	E	Q	V	C	G	W	I	V	W	CPPC	1	7.51027e-06
822	CPPC	P	R	E	H	E	L	V	A	V	P	C	A	R	A	R	N	R	W	E	L	V	S	CPPC	1	7.51027e-06
823	CPPC	P	R	E	H	E	L	V	A	V	P	C	A	R	A	R	N	W	W	E	L	V	S	CPPC	1	7.51027e-06
824	CPPC	P	R	E	H	E	L	V	A	V	P	C	A	R	A	R	N	C	W	S	L	V	S	CPPC	1	7.51027e-06
825	CPPC	P	R	E	H	E	L	V	A	V	P	C	A	E	A	P	N	C	W	Y	L	Q	V	CPPC	1	7.51027e-06
826	CPPC	P	R	E	H	E	L	V	A	V	P	C	A	E	A	P	N	C	W	W	V	T	Q	CPPC	1	7.51027e-06
827	CPPC	P	R	E	H	E	L	V	A	V	P	C	A	A	V	R	R	C	S	G	T	E	E	CPPC	1	7.51027e-06
828	CPPC	P	R	E	H	E	L	V	A	V	P	C	A	G	T	R	S	C	P	R	M	G	K	CPPC	1	7.51027e-06
829	CPPC	P	R	E	H	E	L	V	A	V	P	C	A	G	V	V	H	C	*	N	V	T	V	CPPC	1	7.51027e-06
830	CPPC	P	R	E	H	E	L	V	A	V	P	C	A	E	R	A	N	C	W	H	V	T	L	CPPC	1	7.51027e-06
831	CPPC	P	R	E	H	E	L	V	A	V	P	C	A	K	Q	G	G	C	F	V	L	M	F	CPPC	1	7.51027e-06
832	CPPC	P	R	E	H	E	L	V	A	V	P	C	A	K	R	S	N	C	W	I	V	R	K	CPPC	1	7.51027e-06
833	CPPC	P	R	E	H	E	L	V	A	V	P	C	A	K	V	Q	N	C	W	E	L	V	A	CPPC	1	7.51027e-06
834	CPPC	P	R	E	H	E	L	V	A	V	P	C	A	T	S	M	E	C	M	H	D	H	E	CPPC	1	7.51027e-06
835	CPPC	P	R	E	H	E	L	V	A	V	P	C	A	T	L	S	E	C	A	F	H	R	S	CPPC	1	7.51027e-06
836	CPPC	P	R	E	H	E	L	V	A	V	P	C	A	Q	L	Q	A	C	V	P	S	T	R	CPPC	1	7.51027e-06
837	CPPC	P	R	E	H	E	L	V	A	V	P	C	A	R	F	P	N	C	W	E	L	E	L	CPPC	1	7.51027e-06
838	CPPC	P	R	E	H	E	L	V	A	V	P	C	A	E	R	F	E	C	E	G	S	I	I	CPPC	1	7.51027e-06
839	CPPC	P	R	E	H	E	L	V	A	V	P	C	A	G	V	A	K	C	W	A	V	R	E	CPPC	1	7.51027e-06
840	CPPC	P	R	E	H	E	L	V	A	V	P	C	A	G	V	A	N	C	E	A	V	R	E	CPPC	1	7.51027e-06
841	CPPC	P	R	E	H	E	L	V	A	V	P	C	A	V	A	R	R	C	Y	E	S	R	P	CPPC	1	7.51027e-06
842	CPPC	P	R	E	H	E	L	V	A	V	P	C	A	V	E	S	N	C	W	E	I	K	R	CPPC	1	7.51027e-06
843	CPPC	P	R	E	H	E	L	V	A	V	P	C	A	E	S	S	N	C	W	I	V	R	K	CPPC	1	7.51027e-06
844	CPPC	P	R	E	H	E	L	V	A	V	P	C	A	E	R	S	N	S	W	I	V	R	K	CPPC	1	7.51027e-06
845	CPPC	P	R	E	H	E	L	V	A	V	P	C	A	E	R	S	N	C	G	I	V	R	K	CPPC	1	7.51027e-06
846	CPPC	P	R	E	H	E	L	V	A	V	P	C	A	E	R	S	N	C	W	N	V	R	K	CPPC	1	7.51027e-06
847	CPPC	P	R	E	H	E	L	V	A	V	P	C	A	E	R	S	N	C	W	T	V	R	K	CPPC	1	7.51027e-06
848	CPPC	P	R	E	H	E	L	V	A	V	P	C	A	E	R	S	N	C	W	I	V	R	R	CPPC	1	7.51027e-06
849	CPPC	P	R	E	H	E	L	V	A	V	P	C	A	E	R	S	N	C	W	I	V	W	K	CPPC	1	7.51027e-06
850	CPPC	P	R	E	H	E	L	V	A	V	P	C	A	E	R	S	N	C	W	V	V	R	K	CPPC	1	7.51027e-06
851	CPPC	P	R	E	H	E	L	V	A	V	P	C	A	E	R	S	T	C	G	I	V	R	K	CPPC	1	7.51027e-06
852	CPPC	P	R	E	H	E	L	V	A	V	P	C	A	E	R	S	I	C	W	I	V	R	K	CPPC	1	7.51027e-06
853	CPPC	P	R	E	H	E	L	V	A	V	P	C	A	Y	P	R	T	C	R	S	A	T	S	CPPC	1	7.51027e-06
854	CPPC	P	R	E	H	E	L	V	A	V	P	C	A	S	S	S	N	C	W	E	I	K	R	CPPC	1	7.51027e-06
855	CPPC	P	R	E	H	E	L	V	A	V	P	C	A	F	V	Q	N	C	W	F	V	E	R	CPPC	1	7.51027e-06
856	CPPC	P	R	E	H	E	L	V	A	V	P	C	A	F	E	E	N	C	W	E	I	K	R	CPPC	1	7.51027e-06
857	CPPC	P	R	E	H	E	L	V	A	V	P	C	A	F	E	S	N	R	W	E	I	K	R	CPPC	1	7.51027e-06
858	CPPC	P	R	E	H	E	L	V	A	V	P	C	A	F	E	S	N	C	G	E	I	K	R	CPPC	1	7.51027e-06
859	CPPC	P	R	E	H	E	L	V	A	V	P	C	A	F	E	S	N	C	W	K	V	M	E	CPPC	1	7.51027e-06
860	CPPC	P	R	E	H	E	L	V	A	V	P	C	A	F	E	S	N	C	W	R	I	H	E	CPPC	1	7.51027e-06
861	CPPC	P	R	E	H	E	L	V	A	V	P	C	A	F	E	S	N	C	W	R	V	E	A	CPPC	1	7.51027e-06
862	CPPC	P	R	E	H	E	L	V	A	V	P	C	A	F	E	S	N	C	W	H	I	M	E	CPPC	1	7.51027e-06
863	CPPC	P	R	E	H	E	L	V	A	V	P	C	A	F	E	S	N	C	W	E	T	K	R	CPPC	1	7.51027e-06
864	CPPC	P	R	E	H	E	L	V	A	V	P	C	A	F	E	S	N	C	W	E	M	K	R	CPPC	1	7.51027e-06
865	CPPC	P	R	E	H	E	L	V	A	V	P	C	A	F	E	S	N	C	W	E	I	K	A	CPPC	1	7.51027e-06
866	CPPC	P	R	E	H	E	L	V	A	V	P	C	A	F	E	S	N	C	W	E	I	T	R	CPPC	1	7.51027e-06
867	CPPC	P	R	E	H	E	L	V	A	V	P	C	A	F	E	S	N	C	W	E	I	Q	R	CPPC	1	7.51027e-06
868	CPPC	P	R	E	H	E	L	V	A	V	P	C	A	F	E	S	N	C	W	E	I	L	R	CPPC	1	7.51027e-06
869	CPPC	P	R	E	H	E	L	V	A	V	P	C	A	F	E	S	N	C	W	E	F	K	R	CPPC	1	7.51027e-06
870	CPPC	P	R	E	H	E	L	V	A	V	P	C	A	F	E	S	N	C	W	D	I	K	R	CPPC	1	7.51027e-06
871	CPPC	P	R	E	H	E	L	V	A	V	P	C	A	F	E	S	N	C	W	A	V	R	E	CPPC	1	7.51027e-06
872	CPPC	P	R	E	H	E	L	V	A	V	P	C	A	F	E	S	N	C	W	V	I	K	R	CPPC	1	7.51027e-06
873	CPPC	P	R	E	H	E	L	V	A	V	P	C	A	F	E	S	N	C	W	E	L	I	A	CPPC	1	7.51027e-06
874	CPPC	P	R	E	H	E	L	V	A	V	P	C	A	F	E	S	N	C	W	Y	I	A	R	CPPC	1	7.51027e-06
875	CPPC	P	R	E	H	E	L	V	A	V	P	C	A	F	E	S	I	C	W	E	I	K	R	CPPC	1	7.51027e-06
876	CPPC	P	R	E	H	E	L	V	A	V	P	C	A	F	E	S	D	C	W	E	I	K	R	CPPC	1	7.51027e-06
877	CPPC	P	R	E	H	E	L	V	A	V	P	C	A	F	E	S	Y	C	W	E	I	K	R	CPPC	1	7.51027e-06
878	CPPC	P	R	E	H	E	L	V	A	V	P	C	G	R	R	I	N	C	W	S	I	E	A	CPPC	1	7.51027e-06
879	CPPC	P	R	E	H	E	L	V	A	V	P	C	G	Q	S	F	R	C	L	L	I	L	E	CPPC	1	7.51027e-06
880	CPPC	P	R	E	H	E	L	V	A	V	P	C	G	H	S	L	M	C	P	E	Y	A	R	CPPC	1	7.51027e-06
881	CPPC	P	R	E	H	E	L	V	A	V	P	C	G	P	W	R	V	C	G	Y	V	S	K	CPPC	1	7.51027e-06
882	CPPC	P	R	E	H	E	L	V	A	V	P	C	G	E	F	E	P	C	G	F	P	M	R	CPPC	1	7.51027e-06
883	CPPC	P	R	E	H	E	L	V	A	V	P	C	G	A	M	A	N	C	W	R	V	V	E	CPPC	1	7.51027e-06
884	CPPC	P	R	E	H	E	L	V	A	V	P	C	G	G	M	A	K	C	W	R	V	V	E	CPPC	1	7.51027e-06
885	CPPC	P	R	E	H	E	L	V	A	V	P	C	G	G	M	A	N	C	W	R	G	V	E	CPPC	1	7.51027e-06
886	CPPC	P	R	E	H	E	L	V	A	V	P	C	G	G	M	A	H	C	W	R	V	V	E	CPPC	1	7.51027e-06
887	CPPC	P	R	E	H	E	L	V	A	V	P	C	G	G	M	S	N	C	W	R	V	V	E	CPPC	1	7.51027e-06
888	CPPC	P	R	E	H	E	L	V	A	V	P	C	G	N	E	Q	N	C	W	E	S	K	A	CPPC	1	7.51027e-06
889	CPPC	P	R	E	H	E	L	V	A	V	P	C	G	N	E	Q	I	C	W	E	I	K	A	CPPC	1	7.51027e-06
890	CPPC	P	R	E	H	E	L	V	A	V	P	C	G	T	H	S	E	C	Q	L	I	W	R	CPPC	1	7.51027e-06
891	CPPC	P	R	E	H	E	L	V	A	V	P	C	G	S	T	R	K	C	W	V	I	Q	E	CPPC	1	7.51027e-06
892	CPPC	P	R	E	H	E	L	V	A	V	P	C	G	S	T	R	N	C	W	I	I	Q	E	CPPC	1	7.51027e-06
893	CPPC	P	R	E	H	E	L	V	A	V	P	C	G	S	T	R	N	C	W	V	I	Q	Y	CPPC	1	7.51027e-06
894	CPPC	P	R	E	H	E	L	V	A	V	P	C	G	H	E	N	N	C	W	H	I	S	L	CPPC	1	7.51027e-06
895	CPPC	P	R	E	H	E	L	V	A	V	P	C	G	P	H	H	S	C	F	A	*	I	Q	CPPC	1	7.51027e-06
896	CPPC	P	R	E	H	E	L	V	A	V	P	C	G	P	P	L	E	C	T	V	F	I	I	CPPC	1	7.51027e-06
897	CPPC	P	R	E	H	E	L	V	A	V	P	C	G	P	V	V	E	C	W	Y	V	L	V	CPPC	1	7.51027e-06
898	CPPC	P	R	E	H	E	L	V	A	V	P	C	G	R	G	R	H	C	R	L	R	K	E	CPPC	1	7.51027e-06
899	CPPC	P	R	E	H	E	L	V	A	V	P	C	G	R	V	N	G	C	W	V	L	I	E	CPPC	1	7.51027e-06
900	CPPC	P	R	E	H	E	L	V	A	V	P	C	G	R	E	P	N	C	W	K	V	R	R	CPPC	1	7.51027e-06
901	CPPC	P	R	E	H	E	L	V	A	V	P	C	G	R	E	P	N	C	W	T	V	R	R	CPPC	1	7.51027e-06
902	CPPC	P	R	E	H	E	L	V	A	V	P	C	G	R	E	P	N	C	W	M	G	R	R	CPPC	1	7.51027e-06
903	CPPC	P	R	E	H	E	L	V	A	V	P	C	G	R	E	P	N	C	W	M	V	R	G	CPPC	1	7.51027e-06
904	CPPC	P	R	E	H	E	L	V	A	V	P	C	G	R	E	P	N	C	W	I	V	R	R	CPPC	1	7.51027e-06
905	CPPC	P	R	E	H	E	L	V	A	V	P	C	G	R	E	P	N	C	W	F	I	Q	E	CPPC	1	7.51027e-06
906	CPPC	P	R	E	H	E	L	V	A	V	P	C	G	R	E	P	N	F	W	M	V	R	R	CPPC	1	7.51027e-06
907	CPPC	P	R	E	H	E	L	V	A	V	P	C	G	R	E	P	H	C	G	M	V	R	R	CPPC	1	7.51027e-06
908	CPPC	P	R	E	H	E	L	V	A	V	P	C	G	R	E	L	N	C	W	M	V	R	R	CPPC	1	7.51027e-06
909	CPPC	P	R	E	H	E	L	V	A	V	P	C	G	R	S	P	N	C	W	M	V	R	R	CPPC	1	7.51027e-06
910	CPPC	P	R	E	H	E	L	V	A	V	P	C	G	L	A	R	N	W	W	V	I	S	E	CPPC	1	7.51027e-06
911	CPPC	P	R	E	H	E	L	V	A	V	P	C	G	E	I	L	N	C	W	T	I	T	E	CPPC	1	7.51027e-06
912	CPPC	P	R	E	H	E	L	V	A	V	P	C	G	A	G	L	L	C	T	I	E	M	E	CPPC	1	7.51027e-06
913	CPPC	P	R	E	H	E	L	V	A	V	P	C	G	G	E	S	L	C	F	Y	Y	R	K	CPPC	1	7.51027e-06
914	CPPC	P	R	E	H	E	L	V	A	V	P	C	G	L	V	S	N	C	W	K	V	W	Q	CPPC	1	7.51027e-06
915	CPPC	P	R	E	H	E	L	V	A	V	P	C	G	L	S	S	P	C	M	D	W	M	I	CPPC	1	7.51027e-06
916	CPPC	P	R	E	H	E	L	V	A	V	P	C	G	F	N	T	W	C	V	R	E	E	N	CPPC	1	7.51027e-06
917	CPPC	P	R	E	H	E	L	V	A	V	P	C	G	F	F	E	W	C	Y	L	I	A	T	CPPC	1	7.51027e-06
918	CPPC	P	R	E	H	E	L	V	A	V	P	C	V	R	V	S	N	C	Y	Y	I	I	E	CPPC	1	7.51027e-06
919	CPPC	P	R	E	H	E	L	V	A	V	P	C	V	A	Y	A	N	W	W	L	V	E	R	CPPC	1	7.51027e-06
920	CPPC	P	R	E	H	E	L	V	A	V	P	C	V	A	Y	A	T	C	W	L	V	E	R	CPPC	1	7.51027e-06
921	CPPC	P	R	E	H	E	L	V	A	V	P	C	V	A	L	Q	N	C	W	R	S	H	E	CPPC	1	7.51027e-06
922	CPPC	P	R	E	H	E	L	V	A	V	P	C	V	A	L	Q	N	C	W	R	I	H	Q	CPPC	1	7.51027e-06
923	CPPC	P	R	E	H	E	L	V	A	V	P	C	V	A	L	Q	N	C	W	R	I	D	E	CPPC	1	7.51027e-06
924	CPPC	P	R	E	H	E	L	V	A	V	P	C	V	A	L	Q	N	C	W	Y	L	Q	V	CPPC	1	7.51027e-06
925	CPPC	P	R	E	H	E	L	V	A	V	P	C	V	A	L	E	N	C	W	R	I	H	E	CPPC	1	7.51027e-06
926	CPPC	P	R	E	H	E	L	V	A	V	P	C	V	V	I	P	E	C	A	L	I	K	K	CPPC	1	7.51027e-06
927	CPPC	P	R	E	H	E	L	V	A	V	P	C	V	W	E	W	N	C	W	K	I	K	R	CPPC	1	7.51027e-06
928	CPPC	P	R	E	H	E	L	V	A	V	P	C	V	T	R	Y	R	C	R	E	L	Y	P	CPPC	1	7.51027e-06
929	CPPC	P	R	E	H	E	L	V	A	V	P	C	V	S	E	W	I	C	W	S	T	A	V	CPPC	1	7.51027e-06
930	CPPC	P	R	E	H	E	L	V	A	V	P	C	V	M	H	H	S	C	*	W	M	I	I	CPPC	1	7.51027e-06
931	CPPC	P	R	E	H	E	L	V	A	V	P	C	V	M	R	Q	I	C	V	G	I	E	R	CPPC	1	7.51027e-06
932	CPPC	P	R	E	H	E	L	V	A	V	P	C	V	I	M	G	T	C	T	S	G	T	P	CPPC	1	7.51027e-06
933	CPPC	P	R	E	H	E	L	V	A	V	P	C	V	Q	R	E	N	C	W	E	I	L	E	CPPC	1	7.51027e-06
934	CPPC	P	R	E	H	E	L	V	A	V	P	C	V	Q	R	D	N	W	W	E	I	L	E	CPPC	1	7.51027e-06
935	CPPC	P	R	E	H	E	L	V	A	V	P	C	V	Q	R	D	N	C	E	E	I	L	E	CPPC	1	7.51027e-06
936	CPPC	P	R	E	H	E	L	V	A	V	P	C	V	Q	R	D	N	C	W	E	N	L	E	CPPC	1	7.51027e-06
937	CPPC	P	R	E	H	E	L	V	A	V	P	C	V	Q	R	D	N	C	W	E	S	L	E	CPPC	1	7.51027e-06
938	CPPC	P	R	E	H	E	L	V	A	V	P	C	V	Q	R	D	N	C	W	E	V	L	E	CPPC	1	7.51027e-06
939	CPPC	P	R	E	H	E	L	V	A	V	P	C	V	Q	*	A	S	C	T	Y	Y	Q	D	CPPC	1	7.51027e-06
940	CPPC	P	R	E	H	E	L	V	A	V	P	C	V	H	E	P	K	C	W	Y	I	A	R	CPPC	1	7.51027e-06
941	CPPC	P	R	E	H	E	L	V	A	V	P	C	V	H	E	P	N	C	W	Y	I	A	S	CPPC	1	7.51027e-06
942	CPPC	P	R	E	H	E	L	V	A	V	P	C	V	H	E	P	N	C	W	Y	I	A	M	CPPC	1	7.51027e-06
943	CPPC	P	R	E	H	E	L	V	A	V	P	C	V	H	E	P	N	C	W	F	V	E	A	CPPC	1	7.51027e-06
944	CPPC	P	R	E	H	E	L	V	A	V	P	C	V	H	E	P	N	F	W	Y	I	A	R	CPPC	1	7.51027e-06
945	CPPC	P	R	E	H	E	L	V	A	V	P	C	V	H	E	P	Y	C	W	Y	I	A	R	CPPC	1	7.51027e-06
946	CPPC	P	R	E	H	E	L	V	A	V	P	C	V	H	E	L	N	C	W	Y	I	A	R	CPPC	1	7.51027e-06
947	CPPC	P	R	E	H	E	L	V	A	V	P	C	V	H	E	S	N	C	W	E	I	K	R	CPPC	1	7.51027e-06
948	CPPC	P	R	E	H	E	L	V	A	V	P	C	V	H	E	S	N	C	W	Y	I	A	R	CPPC	1	7.51027e-06
949	CPPC	P	R	E	H	E	L	V	A	V	P	C	V	H	Y	P	N	C	W	Y	I	A	R	CPPC	1	7.51027e-06
950	CPPC	P	R	E	H	E	L	V	A	V	P	C	V	R	E	P	N	C	W	Y	I	A	R	CPPC	1	7.51027e-06
951	CPPC	P	R	E	H	E	L	V	A	V	P	C	V	A	Y	S	Q	C	H	*	E	R	T	CPPC	1	7.51027e-06
952	CPPC	P	R	E	H	E	L	V	A	V	P	C	V	G	R	L	N	C	W	F	I	Q	E	CPPC	1	7.51027e-06
953	CPPC	P	R	E	H	E	L	V	A	V	P	C	V	G	R	V	K	C	W	F	I	Q	E	CPPC	1	7.51027e-06
954	CPPC	P	R	E	H	E	L	V	A	V	P	C	V	G	R	V	N	C	W	E	L	V	A	CPPC	1	7.51027e-06
955	CPPC	P	R	E	H	E	L	V	A	V	P	C	V	G	R	V	N	C	W	Y	I	Q	E	CPPC	1	7.51027e-06
956	CPPC	P	R	E	H	E	L	V	A	V	P	C	V	G	R	V	N	C	W	S	I	Q	E	CPPC	1	7.51027e-06
957	CPPC	P	R	E	H	E	L	V	A	V	P	C	V	G	R	V	N	C	W	F	I	E	E	CPPC	1	7.51027e-06
958	CPPC	P	R	E	H	E	L	V	A	V	P	C	V	G	R	V	I	C	W	F	I	Q	E	CPPC	1	7.51027e-06
959	CPPC	P	R	E	H	E	L	V	A	V	P	C	V	G	R	V	Y	C	W	F	I	Q	E	CPPC	1	7.51027e-06
960	CPPC	P	R	E	H	E	L	V	A	V	P	C	V	G	R	F	N	C	W	F	I	Q	E	CPPC	1	7.51027e-06
961	CPPC	P	R	E	H	E	L	V	A	V	P	C	V	G	L	V	N	C	W	F	I	Q	E	CPPC	1	7.51027e-06
962	CPPC	P	R	E	H	E	L	V	A	V	P	C	V	V	R	R	R	C	E	R	A	T	V	CPPC	1	7.51027e-06
963	CPPC	P	R	E	H	E	L	V	A	V	P	C	V	V	L	P	E	C	A	N	Y	L	Q	CPPC	1	7.51027e-06
964	CPPC	P	R	E	H	E	L	V	A	V	P	C	V	V	E	S	N	C	W	R	I	N	S	CPPC	1	7.51027e-06
965	CPPC	P	R	E	H	E	L	V	A	V	P	C	V	S	H	S	T	C	W	E	L	I	S	CPPC	1	7.51027e-06
966	CPPC	P	R	E	H	E	L	V	A	V	P	C	E	T	L	P	N	C	W	R	V	D	S	CPPC	1	7.51027e-06
967	CPPC	P	R	E	H	E	L	V	A	V	P	C	E	T	S	V	L	C	V	E	I	R	F	CPPC	1	7.51027e-06
968	CPPC	P	R	E	H	E	L	V	A	V	P	C	E	T	F	E	E	C	E	R	I	E	E	CPPC	1	7.51027e-06
969	CPPC	P	R	E	H	E	L	V	A	V	P	C	E	R	S	A	E	C	W	S	S	M	V	CPPC	1	7.51027e-06
970	CPPC	P	R	E	H	E	L	V	A	V	P	C	E	R	S	A	Y	C	W	S	S	M	V	CPPC	1	7.51027e-06
971	CPPC	P	R	E	H	E	L	V	A	V	P	C	E	S	L	N	N	C	W	F	V	E	A	CPPC	1	7.51027e-06
972	CPPC	P	R	E	H	E	L	V	A	V	P	C	E	Q	P	P	N	C	W	R	I	E	A	CPPC	1	7.51027e-06
973	CPPC	P	R	E	H	E	L	V	A	V	P	C	E	Q	L	P	N	C	W	R	S	E	A	CPPC	1	7.51027e-06
974	CPPC	P	R	E	H	E	L	V	A	V	P	C	E	Q	V	I	N	C	F	A	I	R	Q	CPPC	1	7.51027e-06
975	CPPC	P	R	E	H	E	L	V	A	V	P	C	E	H	K	S	N	C	W	M	V	I	I	CPPC	1	7.51027e-06
976	CPPC	P	R	E	H	E	L	V	A	V	P	C	E	R	A	P	K	C	W	Y	L	L	E	CPPC	1	7.51027e-06
977	CPPC	P	R	E	H	E	L	V	A	V	P	C	E	R	R	W	L	C	Y	R	F	V	Y	CPPC	1	7.51027e-06
978	CPPC	P	R	E	H	E	L	V	A	V	P	C	E	R	E	P	N	C	Y	V	I	S	R	CPPC	1	7.51027e-06
979	CPPC	P	R	E	H	E	L	V	A	V	P	C	E	R	W	R	G	C	Q	K	E	T	P	CPPC	1	7.51027e-06
980	CPPC	P	R	E	H	E	L	V	A	V	P	C	E	A	E	M	N	C	W	V	V	E	R	CPPC	1	7.51027e-06
981	CPPC	P	R	E	H	E	L	V	A	V	P	C	E	A	L	N	N	C	W	F	V	E	A	CPPC	1	7.51027e-06
982	CPPC	P	R	E	H	E	L	V	A	V	P	C	E	A	L	T	N	C	W	Q	I	M	V	CPPC	1	7.51027e-06
983	CPPC	P	R	E	H	E	L	V	A	V	P	C	E	G	R	P	N	C	W	A	I	Q	R	CPPC	1	7.51027e-06
984	CPPC	P	R	E	H	E	L	V	A	V	P	C	E	G	R	R	K	C	W	A	I	Q	R	CPPC	1	7.51027e-06
985	CPPC	P	R	E	H	E	L	V	A	V	P	C	E	G	R	R	N	C	Y	I	V	K	R	CPPC	1	7.51027e-06
986	CPPC	P	R	E	H	E	L	V	A	V	P	C	E	G	R	R	N	C	W	E	I	Q	R	CPPC	1	7.51027e-06
987	CPPC	P	R	E	H	E	L	V	A	V	P	C	E	G	R	R	N	C	W	E	L	I	A	CPPC	1	7.51027e-06
988	CPPC	P	R	E	H	E	L	V	A	V	P	C	E	G	R	R	N	C	W	S	I	Q	R	CPPC	1	7.51027e-06
989	CPPC	P	R	E	H	E	L	V	A	V	P	C	E	G	R	R	D	C	W	A	I	Q	R	CPPC	1	7.51027e-06
990	CPPC	P	R	E	H	E	L	V	A	V	P	C	E	G	R	L	N	C	W	A	I	Q	R	CPPC	1	7.51027e-06
991	CPPC	P	R	E	H	E	L	V	A	V	P	C	E	G	L	N	K	W	W	F	V	E	A	CPPC	1	7.51027e-06
992	CPPC	P	R	E	H	E	L	V	A	V	P	C	E	G	L	N	K	C	W	V	V	E	A	CPPC	1	7.51027e-06
993	CPPC	P	R	E	H	E	L	V	A	V	P	C	E	G	L	N	K	C	W	L	V	E	A	CPPC	1	7.51027e-06
994	CPPC	P	R	E	H	E	L	V	A	V	P	C	E	G	L	N	N	R	W	F	V	E	A	CPPC	1	7.51027e-06
995	CPPC	P	R	E	H	E	L	V	A	V	P	C	E	G	L	N	N	W	W	V	V	E	A	CPPC	1	7.51027e-06
996	CPPC	P	R	E	H	E	L	V	A	V	P	C	E	G	L	N	N	C	R	F	A	E	A	CPPC	1	7.51027e-06
997	CPPC	P	R	E	H	E	L	V	A	V	P	C	E	G	L	N	N	C	Y	I	V	K	R	CPPC	1	7.51027e-06
998	CPPC	P	R	E	H	E	L	V	A	V	P	C	E	G	L	N	N	C	W	K	V	E	H	CPPC	1	7.51027e-06
999	CPPC	P	R	E	H	E	L	V	A	V	P	C	E	G	L	N	N	C	W	K	V	E	Q	CPPC	1	7.51027e-06
1000	CPPC	P	R	E	H	E	L	V	A	V	P	C	E	G	L	N	N	C	W	N	V	E	A	CPPC	1	7.51027e-06
1001	CPPC	P	R	E	H	E	L	V	A	V	P	C	E	G	L	N	N	C	W	R	V	I	E	CPPC	1	7.51027e-06
1002	CPPC	P	R	E	H	E	L	V	A	V	P	C	E	G	L	N	N	C	W	R	V	L	H	CPPC	1	7.51027e-06
1003	CPPC	P	R	E	H	E	L	V	A	V	P	C	E	G	L	N	N	C	W	L	V	E	R	CPPC	1	7.51027e-06
1004	CPPC	P	R	E	H	E	L	V	A	V	P	C	E	G	L	N	N	C	W	L	L	E	V	CPPC	1	7.51027e-06
1005	CPPC	P	R	E	H	E	L	V	A	V	P	C	E	G	L	N	N	C	W	L	V	E	T	CPPC	1	7.51027e-06
1006	CPPC	P	R	E	H	E	L	V	A	V	P	C	E	G	L	N	N	C	W	E	I	K	A	CPPC	1	7.51027e-06
1007	CPPC	P	R	E	H	E	L	V	A	V	P	C	E	G	L	N	N	C	W	V	V	E	R	CPPC	1	7.51027e-06
1008	CPPC	P	R	E	H	E	L	V	A	V	P	C	E	G	L	N	N	C	W	V	L	E	S	CPPC	1	7.51027e-06
1009	CPPC	P	R	E	H	E	L	V	A	V	P	C	E	G	L	N	N	C	W	V	V	S	P	CPPC	1	7.51027e-06
1010	CPPC	P	R	E	H	E	L	V	A	V	P	C	E	G	L	N	N	C	W	E	L	I	F	CPPC	1	7.51027e-06
1011	CPPC	P	R	E	H	E	L	V	A	V	P	C	E	G	L	N	N	C	W	Y	L	Q	V	CPPC	1	7.51027e-06
1012	CPPC	P	R	E	H	E	L	V	A	V	P	C	E	G	L	N	N	C	W	S	I	E	A	CPPC	1	7.51027e-06
1013	CPPC	P	R	E	H	E	L	V	A	V	P	C	E	G	L	N	N	C	W	W	I	E	R	CPPC	1	7.51027e-06
1014	CPPC	P	R	E	H	E	L	V	A	V	P	C	E	G	L	N	N	C	W	F	M	E	A	CPPC	1	7.51027e-06
1015	CPPC	P	R	E	H	E	L	V	A	V	P	C	E	G	L	N	N	C	W	F	G	E	A	CPPC	2	1.50205e-05
1016	CPPC	P	R	E	H	E	L	V	A	V	P	C	E	G	L	N	N	C	W	F	V	M	V	CPPC	1	7.51027e-06
1017	CPPC	P	R	E	H	E	L	V	A	V	P	C	E	G	L	N	N	C	W	F	V	*	T	CPPC	1	7.51027e-06
1018	CPPC	P	R	E	H	E	L	V	A	V	P	C	E	G	L	N	N	C	W	F	V	E	P	CPPC	2	1.50205e-05
1019	CPPC	P	R	E	H	E	L	V	A	V	P	C	E	G	L	N	N	C	W	F	V	L	A	CPPC	1	7.51027e-06
1020	CPPC	P	R	E	H	E	L	V	A	V	P	C	E	G	L	N	I	C	W	F	V	R	K	CPPC	1	7.51027e-06
1021	CPPC	P	R	E	H	E	L	V	A	V	P	C	E	G	L	N	I	C	W	F	V	E	A	CPPC	1	7.51027e-06
1022	CPPC	P	R	E	H	E	L	V	A	V	P	C	E	G	L	N	H	C	G	F	V	E	A	CPPC	1	7.51027e-06
1023	CPPC	P	R	E	H	E	L	V	A	V	P	C	E	G	L	N	H	C	W	V	V	E	A	CPPC	1	7.51027e-06
1024	CPPC	P	R	E	H	E	L	V	A	V	P	C	E	G	L	H	N	W	W	F	V	E	A	CPPC	1	7.51027e-06
1025	CPPC	P	R	E	H	E	L	V	A	V	P	C	E	G	L	H	N	C	W	V	V	E	A	CPPC	1	7.51027e-06
1026	CPPC	P	R	E	H	E	L	V	A	V	P	C	E	G	L	H	T	C	W	F	V	E	A	CPPC	1	7.51027e-06
1027	CPPC	P	R	E	H	E	L	V	A	V	P	C	E	G	E	E	H	C	V	R	I	V	L	CPPC	1	7.51027e-06
1028	CPPC	P	R	E	H	E	L	V	A	V	P	C	E	V	E	M	N	S	W	V	V	E	R	CPPC	1	7.51027e-06
1029	CPPC	P	R	E	H	E	L	V	A	V	P	C	E	V	E	M	N	C	W	M	V	R	R	CPPC	1	7.51027e-06
1030	CPPC	P	R	E	H	E	L	V	A	V	P	C	E	V	R	R	N	C	W	A	I	Q	R	CPPC	1	7.51027e-06
1031	CPPC	P	R	E	H	E	L	V	A	V	P	C	E	V	R	N	N	C	W	I	V	I	R	CPPC	1	7.51027e-06
1032	CPPC	P	R	E	H	E	L	V	A	V	P	C	E	S	T	F	N	C	L	V	T	E	S	CPPC	1	7.51027e-06
1033	CPPC	P	R	E	H	E	L	V	A	V	P	C	E	S	H	I	A	C	V	W	S	S	L	CPPC	1	7.51027e-06
1034	CPPC	P	R	E	H	E	L	V	A	V	P	C	E	S	L	H	R	C	N	V	V	L	E	CPPC	1	7.51027e-06
1035	CPPC	P	R	E	H	E	L	V	A	V	P	C	E	S	G	S	E	C	V	P	N	S	S	CPPC	1	7.51027e-06
1036	CPPC	P	R	E	H	E	L	V	A	V	P	C	E	S	L	M	Y	C	W	H	L	T	V	CPPC	1	7.51027e-06
1037	CPPC	P	R	E	H	E	L	V	A	V	P	C	E	W	R	A	W	C	F	T	I	E	R	CPPC	1	7.51027e-06
1038	CPPC	P	R	E	H	E	L	V	A	V	P	C	E	L	H	F	S	C	G	G	L	E	R	CPPC	1	7.51027e-06
1039	CPPC	P	R	E	H	E	L	V	A	V	P	C	E	F	R	F	N	C	W	Y	L	Q	V	CPPC	1	7.51027e-06
1040	CPPC	P	R	E	H	E	L	V	A	V	P	C	E	F	R	N	N	C	W	F	V	E	A	CPPC	1	7.51027e-06
1041	CPPC	P	R	E	H	E	L	V	A	V	P	C	Y	S	L	P	S	C	K	R	K	E	R	CPPC	1	7.51027e-06
1042	CPPC	P	R	E	H	E	L	V	A	V	P	C	Y	H	M	V	N	C	W	F	L	E	L	CPPC	1	7.51027e-06
1043	CPPC	P	R	E	H	E	L	V	A	V	P	C	Y	H	M	V	N	C	W	F	V	E	V	CPPC	1	7.51027e-06
1044	CPPC	P	R	E	H	E	L	V	A	V	P	C	Y	L	R	P	E	C	G	A	S	Y	K	CPPC	1	7.51027e-06
1045	CPPC	P	R	E	H	E	L	V	A	V	P	C	Y	E	L	Y	N	C	W	H	L	T	I	CPPC	1	7.51027e-06
1046	CPPC	P	R	E	H	E	L	V	A	V	P	C	Y	S	L	H	W	C	A	W	L	M	E	CPPC	1	7.51027e-06
1047	CPPC	P	R	E	H	E	L	V	A	V	P	C	S	T	E	P	L	C	V	L	F	W	W	CPPC	1	7.51027e-06
1048	CPPC	P	R	E	H	E	L	V	A	V	P	C	S	M	L	L	F	C	W	T	L	E	S	CPPC	1	7.51027e-06
1049	CPPC	P	R	E	H	E	L	V	A	V	P	C	S	H	K	A	N	C	W	V	V	S	E	CPPC	1	7.51027e-06
1050	CPPC	P	R	E	H	E	L	V	A	V	P	C	S	P	R	T	S	C	Q	P	L	R	R	CPPC	1	7.51027e-06
1051	CPPC	P	R	E	H	E	L	V	A	V	P	C	S	R	I	A	V	C	N	H	P	S	V	CPPC	1	7.51027e-06
1052	CPPC	P	R	E	H	E	L	V	A	V	P	C	S	L	M	S	E	C	W	K	E	G	F	CPPC	1	7.51027e-06
1053	CPPC	P	R	E	H	E	L	V	A	V	P	C	S	A	R	L	N	C	W	N	V	I	E	CPPC	1	7.51027e-06
1054	CPPC	P	R	E	H	E	L	V	A	V	P	C	S	G	V	R	K	C	W	T	V	R	D	CPPC	1	7.51027e-06
1055	CPPC	P	R	E	H	E	L	V	A	V	P	C	S	G	I	R	Y	C	W	Y	V	H	E	CPPC	1	7.51027e-06
1056	CPPC	P	R	E	H	E	L	V	A	V	P	C	S	G	L	N	K	C	W	F	V	E	A	CPPC	1	7.51027e-06
1057	CPPC	P	R	E	H	E	L	V	A	V	P	C	S	G	L	N	N	W	W	F	V	E	A	CPPC	1	7.51027e-06
1058	CPPC	P	R	E	H	E	L	V	A	V	P	C	S	G	L	N	N	C	W	F	G	E	A	CPPC	1	7.51027e-06
1059	CPPC	P	R	E	H	E	L	V	A	V	P	C	S	G	L	H	N	C	W	F	V	E	A	CPPC	1	7.51027e-06
1060	CPPC	P	R	E	H	E	L	V	A	V	P	C	S	G	E	P	N	C	W	F	L	V	R	CPPC	1	7.51027e-06
1061	CPPC	P	R	E	H	E	L	V	A	V	P	C	S	V	E	P	N	R	W	F	L	V	R	CPPC	1	7.51027e-06
1062	CPPC	P	R	E	H	E	L	V	A	V	P	C	S	Y	E	L	N	C	W	R	V	I	E	CPPC	1	7.51027e-06
1063	CPPC	P	R	E	H	E	L	V	A	V	P	C	S	S	R	A	N	C	W	W	I	E	R	CPPC	1	7.51027e-06
1064	CPPC	P	R	E	H	E	L	V	A	V	P	C	S	W	P	N	N	C	V	S	G	E	E	CPPC	1	7.51027e-06
1065	CPPC	P	R	E	H	E	L	V	A	V	P	C	S	L	M	R	L	C	S	R	E	S	R	CPPC	1	7.51027e-06
1066	CPPC	P	R	E	H	E	L	V	A	V	P	C	S	K	V	Q	N	S	W	E	L	V	A	CPPC	1	7.51027e-06
1067	CPPC	P	R	E	H	E	L	V	A	V	P	C	S	K	V	Q	N	W	W	E	L	V	A	CPPC	1	7.51027e-06
1068	CPPC	P	R	E	H	E	L	V	A	V	P	C	S	K	V	Q	N	C	W	R	I	E	E	CPPC	1	7.51027e-06
1069	CPPC	P	R	E	H	E	L	V	A	V	P	C	S	K	V	Q	N	C	W	Y	L	V	A	CPPC	1	7.51027e-06
1070	CPPC	P	R	E	H	E	L	V	A	V	P	C	S	K	V	Q	N	C	W	E	I	V	R	CPPC	1	7.51027e-06
1071	CPPC	P	R	E	H	E	L	V	A	V	P	C	S	K	V	Q	N	C	W	E	S	V	A	CPPC	1	7.51027e-06
1072	CPPC	P	R	E	H	E	L	V	A	V	P	C	S	K	V	Q	N	C	W	E	L	V	P	CPPC	1	7.51027e-06
1073	CPPC	P	R	E	H	E	L	V	A	V	P	C	S	K	V	Q	N	C	W	E	L	V	V	CPPC	1	7.51027e-06
1074	CPPC	P	R	E	H	E	L	V	A	V	P	C	S	K	V	Q	N	C	W	E	L	V	S	CPPC	1	7.51027e-06
1075	CPPC	P	R	E	H	E	L	V	A	V	P	C	S	K	V	Q	N	C	W	W	L	V	A	CPPC	1	7.51027e-06
1076	CPPC	P	R	E	H	E	L	V	A	V	P	C	S	N	A	V	R	C	P	S	E	P	E	CPPC	1	7.51027e-06
1077	CPPC	P	R	E	H	E	L	V	A	V	P	C	S	T	M	T	N	C	F	W	I	R	Q	CPPC	1	7.51027e-06
1078	CPPC	P	R	E	H	E	L	V	A	V	P	C	S	S	H	S	P	V	C	*	S	Y	T	CPPC	1	7.51027e-06
1079	CPPC	P	R	E	H	E	L	V	A	V	P	C	S	S	R	T	L	C	A	R	R	E	R	CPPC	1	7.51027e-06
1080	CPPC	P	R	E	H	E	L	V	A	V	P	C	S	P	D	H	V	C	D	Q	E	R	R	CPPC	1	7.51027e-06
1081	CPPC	P	R	E	H	E	L	V	A	V	P	C	S	P	Q	R	P	C	Y	P	I	N	P	CPPC	1	7.51027e-06
1082	CPPC	P	R	E	H	E	L	V	A	V	P	C	S	R	R	S	N	C	A	L	H	E	E	CPPC	1	7.51027e-06
1083	CPPC	P	R	E	H	E	L	V	A	V	P	C	S	L	G	G	D	C	Y	P	E	F	R	CPPC	1	7.51027e-06
1084	CPPC	P	R	E	H	E	L	V	A	V	P	C	S	G	R	F	R	C	S	L	G	S	D	CPPC	1	7.51027e-06
1085	CPPC	P	R	E	H	E	L	V	A	V	P	C	S	G	V	A	N	C	W	A	V	R	E	CPPC	1	7.51027e-06
1086	CPPC	P	R	E	H	E	L	V	A	V	P	C	S	E	Q	L	Y	C	W	F	V	Y	V	CPPC	1	7.51027e-06
1087	CPPC	P	R	E	H	E	L	V	A	V	P	C	S	E	R	S	N	C	W	I	V	R	K	CPPC	1	7.51027e-06
1088	CPPC	P	R	E	H	E	L	V	A	V	P	C	W	T	F	W	L	C	L	F	R	V	E	CPPC	1	7.51027e-06
1089	CPPC	P	R	E	H	E	L	V	A	V	P	C	W	R	Y	Y	E	C	T	R	F	D	R	CPPC	1	7.51027e-06
1090	CPPC	P	R	E	H	E	L	V	A	V	P	C	W	L	S	V	W	C	M	W	L	E	S	CPPC	1	7.51027e-06
1091	CPPC	P	R	E	H	E	L	V	A	V	P	C	W	E	Q	W	Q	C	L	L	E	H	A	CPPC	1	7.51027e-06
1092	CPPC	P	R	E	H	E	L	V	A	V	P	C	W	E	R	R	S	C	D	P	D	H	K	CPPC	1	7.51027e-06
1093	CPPC	P	R	E	H	E	L	V	A	V	P	C	W	F	R	L	N	C	W	Y	L	Q	V	CPPC	1	7.51027e-06
1094	CPPC	P	R	E	H	E	L	V	A	V	P	C	L	A	T	Y	A	C	N	F	E	L	M	CPPC	1	7.51027e-06
1095	CPPC	P	R	E	H	E	L	V	A	V	P	C	L	G	L	N	N	C	W	F	V	E	A	CPPC	1	7.51027e-06
1096	CPPC	P	R	E	H	E	L	V	A	V	P	C	L	S	R	A	N	C	E	W	I	E	R	CPPC	1	7.51027e-06
1097	CPPC	P	R	E	H	E	L	V	A	V	P	C	L	S	R	A	N	C	L	W	I	E	R	CPPC	1	7.51027e-06
1098	CPPC	P	R	E	H	E	L	V	A	V	P	C	L	S	R	A	S	C	W	W	I	E	R	CPPC	1	7.51027e-06
1099	CPPC	P	R	E	H	E	L	V	A	V	P	C	L	S	E	T	E	C	P	F	F	S	G	CPPC	1	7.51027e-06
1100	CPPC	P	R	E	H	E	L	V	A	V	P	C	L	L	R	A	N	C	W	W	I	E	R	CPPC	1	7.51027e-06
1101	CPPC	P	R	E	H	E	L	V	A	V	P	C	F	N	E	V	E	C	T	D	S	D	R	CPPC	1	7.51027e-06
1102	CPPC	P	R	E	H	E	L	V	A	V	P	C	F	S	L	K	S	C	*	L	N	T	P	CPPC	1	7.51027e-06
1103	CPPC	P	R	E	H	E	L	V	A	V	P	C	F	I	P	E	E	C	E	D	E	K	P	CPPC	1	7.51027e-06
1104	CPPC	P	R	E	H	E	L	V	A	V	P	C	F	H	E	V	P	C	F	Y	L	E	R	CPPC	1	7.51027e-06
1105	CPPC	P	R	E	H	E	L	V	A	V	P	C	F	A	P	H	N	C	W	Y	V	E	V	CPPC	1	7.51027e-06
1106	CPPC	P	R	E	H	E	L	V	A	V	P	C	F	E	K	G	Y	C	A	V	I	R	P	CPPC	1	7.51027e-06
1107	CPPC	P	R	E	H	E	L	V	A	V	P	C	A	E	R	S	N	C	W	I	V	G	K	CPPC	1	7.51027e-06
1108	CPPC	P	R	E	H	E	L	V	A	V	P	C	G	R	E	P	N	C	W	M	V	G	R	CPPC	1	7.51027e-06
1109	CPPC	P	R	E	H	E	L	V	A	V	P	C	D	S	F	T	H	C	W	E	L	L	T	CPPC	1	7.51027e-06
