# Supplementary material for: Structure-guided design of CPPC-paired disulfide-rich peptide libraries for ligand and drug discovery
Source: Chem Sci. 2022 May 20;13(26):7780–9. doi: 10.1039/d2sc00924b (PMC9258321; doi:10.1039/d2sc00924b)
Supplement: SC-013-D2SC00924B-s007 [file SC-013-D2SC00924B-s007.xlsx]

## Sheet: MDM2第三轮高通量序列 (2)
Number	Sequence																			Abundance	Percentages
1	CPPC	E	S	C	H	S	G	E	S	T	F	W	C	Y	W	E	A	L	CPPC	1675	0.251426
2	CPPC	R	F	E	G	C	E	G	D	Y	D	L	C	E	Y	R	V	H	CPPC	1576	0.236566
3	CPPC	T	F	V	D	C	W	E	H	L	N	H	C	T	T	T	N	E	CPPC	638	0.095767
4	CPPC	E	S	Q	T	C	V	S	F	L	G	C	W	A	E	L	A	S	CPPC	277	0.0415791
5	CPPC	T	R	G	C	T	G	F	A	E	E	W	C	A	L	A	G	A	CPPC	230	0.0345242
6	CPPC	K	G	G	C	I	P	A	D	G	F	V	C	Y	W	S	E	L	CPPC	223	0.0334734
7	CPPC	S	F	R	W	H	C	L	W	P	W	E	C	H	S	E	H	R	CPPC	159	0.0238667
8	CPPC	F	S	R	C	V	S	F	V	E	C	W	M	G	V	I	E	S	CPPC	108	0.0162113
9	CPPC	S	D	N	C	L	V	V	D	E	D	G	C	A	L	S	Y	V	CPPC	87	0.0130591
10	CPPC	H	D	V	C	Y	F	S	E	G	D	E	C	L	I	L	I	E	CPPC	77	0.0115581
11	CPPC	F	A	E	F	W	C	Q	M	I	G	T	C	T	T	E	A	N	CPPC	74	0.0111078
12	CPPC	R	P	Y	C	W	V	T	E	S	S	F	C	V	V	W	E	V	CPPC	71	0.0106575
13	CPPC	T	I	T	I	D	C	T	H	G	N	V	C	L	D	V	S	V	CPPC	52	0.00780546
14	CPPC	M	T	F	W	E	C	W	T	R	L	L	C	D	R	P	T	S	CPPC	47	0.00705494
15	CPPC	G	A	E	R	C	S	V	F	A	V	C	W	E	S	L	S	S	CPPC	37	0.00555389
16	CPPC	T	S	S	C	G	D	F	L	E	C	W	A	E	I	Q	P	P	CPPC	31	0.00465326
17	CPPC	R	C	E	G	C	E	G	D	Y	D	L	C	E	Y	R	V	H	CPPC	27	0.00405284
18	CPPC	R	V	E	G	C	E	G	D	Y	D	L	C	E	Y	R	V	H	CPPC	25	0.00375263
19	CPPC	E	A	V	P	C	Q	S	F	S	R	C	W	D	A	F	S	R	CPPC	24	0.00360252
20	CPPC	K	H	A	C	K	R	L	T	W	L	V	C	E	W	L	L	P	CPPC	18	0.00270189
21	CPPC	V	Q	T	T	K	C	G	T	F	E	D	C	W	F	T	L	M	CPPC	18	0.00270189
22	CPPC	T	V	W	C	P	E	S	C	P	E	L	C	V	C	D	E	S	CPPC	16	0.00240168
23	CPPC	T	V	V	D	C	W	E	H	L	N	H	C	T	T	T	N	E	CPPC	13	0.00195137
24	CPPC	Q	D	L	G	C	T	R	F	V	D	C	W	E	L	L	S	G	CPPC	13	0.00195137
25	CPPC	A	A	F	E	C	H	W	L	W	L	S	C	G	L	A	M	A	CPPC	13	0.00195137
26	CPPC	A	D	F	R	T	C	W	N	L	L	Y	C	H	F	D	Y	E	CPPC	13	0.00195137
27	CPPC	R	L	W	M	C	W	E	R	L	V	C	E	A	V	G	G	K	CPPC	12	0.00180126
28	CPPC	E	S	C	H	S	G	E	S	T	C	W	C	Y	W	E	A	L	CPPC	11	0.00165116
29	CPPC	R	F	E	G	C	E	G	D	Y	D	L	C	E	S	R	V	H	CPPC	7	0.00105074
30	CPPC	M	R	T	W	C	I	F	G	E	C	Y	C	T	K	P	N	R	CPPC	6	0.00090063
31	CPPC	H	G	N	K	C	V	L	T	A	I	C	R	L	F	R	P	E	CPPC	6	0.00090063
32	CPPC	P	A	L	C	N	R	V	E	E	C	P	T	R	A	L	T	R	CPPC	6	0.00090063
33	CPPC	H	S	F	S	C	F	W	H	R	Y	F	C	E	S	V	P	G	CPPC	5	0.000750525
34	CPPC	P	Q	R	G	C	G	R	V	L	E	A	C	G	C	G	A	S	CPPC	5	0.000750525
35	CPPC	R	I	Y	V	C	M	V	R	G	L	V	C	R	I	E	M	S	CPPC	5	0.000750525
36	CPPC	R	G	F	S	C	E	W	G	R	W	L	C	H	F	W	R	F	CPPC	5	0.000750525
37	CPPC	R	N	R	D	C	A	S	Q	F	A	C	L	W	N	L	I	T	CPPC	5	0.000750525
38	CPPC	R	G	C	C	C	R	V	L	E	L	F	C	R	L	G	I	H	CPPC	5	0.000750525
39	CPPC	L	P	C	I	W	G	E	F	C	W	R	S	P	W	L	L	F	CPPC	5	0.000750525
40	CPPC	L	A	R	C	E	V	V	G	E	G	V	C	M	W	V	A	R	CPPC	5	0.000750525
41	CPPC	A	L	V	C	D	C	R	Y	E	D	A	C	S	C	S	P	S	CPPC	5	0.000750525
42	CPPC	G	L	R	R	C	T	D	F	E	A	C	W	R	S	L	T	S	CPPC	5	0.000750525
43	CPPC	E	T	C	H	S	G	E	S	T	F	W	C	Y	W	E	A	L	CPPC	5	0.000750525
44	CPPC	E	S	Q	I	C	V	S	F	L	G	C	W	A	E	L	A	S	CPPC	5	0.000750525
45	CPPC	W	S	E	C	L	V	Y	V	R	C	S	W	V	A	H	F	G	CPPC	5	0.000750525
46	CPPC	N	E	V	S	K	C	T	T	F	S	S	C	W	S	M	I	V	CPPC	5	0.000750525
47	CPPC	W	I	E	L	G	C	E	A	P	D	A	C	T	L	S	I	N	CPPC	5	0.000750525
48	CPPC	T	F	V	D	C	W	E	H	L	N	H	C	T	T	T	N	E	CPPC	4	0.00060042
49	CPPC	R	D	R	C	E	A	L	T	R	A	G	C	R	V	G	S	E	CPPC	4	0.00060042
50	CPPC	R	L	E	G	C	E	G	D	Y	D	L	C	E	Y	R	V	H	CPPC	4	0.00060042
51	CPPC	R	F	E	G	C	E	G	D	Y	D	L	C	E	Y	R	V	Q	CPPC	4	0.00060042
52	CPPC	R	F	E	G	C	G	G	D	Y	D	L	C	E	Y	R	V	H	CPPC	4	0.00060042
53	CPPC	Q	R	L	C	T	R	G	L	E	R	V	C	H	S	L	R	L	CPPC	4	0.00060042
54	CPPC	P	R	C	C	A	Y	C	T	G	C	T	M	E	S	I	L	A	CPPC	4	0.00060042
55	CPPC	P	G	E	C	I	M	L	P	S	C	S	R	E	R	S	K	E	CPPC	4	0.00060042
56	CPPC	R	R	T	C	S	V	S	E	F	C	D	F	W	V	Q	L	M	CPPC	4	0.00060042
57	CPPC	A	R	T	C	R	V	A	F	L	C	S	W	L	Q	S	W	E	CPPC	4	0.00060042
58	CPPC	G	P	E	C	Q	F	S	H	L	W	S	C	L	S	R	E	P	CPPC	4	0.00060042
59	CPPC	W	P	R	I	C	P	R	P	V	R	L	C	L	L	L	R	E	CPPC	4	0.00060042
60	CPPC	W	W	V	R	C	V	W	V	T	L	W	C	R	P	A	R	E	CPPC	4	0.00060042
61	CPPC	R	A	L	C	G	R	A	Y	M	C	E	L	L	R	G	H	F	CPPC	4	0.00060042
62	CPPC	L	N	A	N	K	C	T	D	F	L	S	C	W	E	G	V	M	CPPC	4	0.00060042
63	CPPC	D	W	T	S	L	C	K	R	L	R	M	C	W	K	W	A	E	CPPC	4	0.00060042
64	CPPC	E	R	R	C	F	C	L	I	L	R	I	C	G	E	P	G	S	CPPC	4	0.00060042
65	CPPC	E	S	P	R	T	C	L	K	R	L	L	C	Q	V	R	L	S	CPPC	4	0.00060042
66	CPPC	W	L	L	Q	T	C	R	V	L	H	W	C	W	E	R	T	T	CPPC	4	0.00060042
67	CPPC	F	W	V	L	W	C	R	M	M	R	S	C	H	P	R	H	A	CPPC	4	0.00060042
68	CPPC	K	G	R	C	W	S	L	E	R	M	H	C	C	A	L	L	K	CPPC	3	0.000450315
69	CPPC	T	R	G	C	T	G	C	A	E	E	W	C	A	L	A	G	A	CPPC	3	0.000450315
70	CPPC	T	A	Q	E	C	Y	S	D	L	P	E	C	L	S	F	G	W	CPPC	3	0.000450315
71	CPPC	T	F	V	D	C	W	E	H	L	N	H	C	T	T	T	N	E	CPPC	3	0.000450315
72	CPPC	T	R	E	C	S	R	G	A	F	T	W	C	A	A	G	F	C	CPPC	3	0.000450315
73	CPPC	R	W	S	Y	C	V	I	R	R	V	T	C	E	S	R	A	G	CPPC	3	0.000450315
74	CPPC	R	F	E	G	C	E	G	E	Y	D	L	C	E	Y	R	V	H	CPPC	3	0.000450315
75	CPPC	R	F	E	G	C	E	G	D	Y	D	M	C	E	Y	R	V	H	CPPC	3	0.000450315
76	CPPC	R	F	E	G	C	E	G	D	Y	D	L	S	E	Y	R	V	H	CPPC	3	0.000450315
77	CPPC	R	F	E	G	C	V	G	D	Y	D	L	C	E	Y	R	V	H	CPPC	3	0.000450315
78	CPPC	H	E	H	K	C	R	V	K	P	F	C	R	A	K	W	L	L	CPPC	3	0.000450315
79	CPPC	P	P	A	C	A	V	L	E	W	L	V	C	E	F	R	W	G	CPPC	3	0.000450315
80	CPPC	R	F	G	C	I	A	G	W	W	E	S	C	F	G	P	T	W	CPPC	3	0.000450315
81	CPPC	R	L	S	E	C	M	C	M	I	L	R	C	V	T	A	L	Q	CPPC	3	0.000450315
82	CPPC	R	V	R	C	M	L	L	P	R	V	V	C	G	H	W	L	E	CPPC	3	0.000450315
83	CPPC	L	L	I	G	C	L	L	C	E	R	V	C	N	S	C	A	L	CPPC	3	0.000450315
84	CPPC	L	W	R	C	Q	M	F	G	E	C	M	I	I	S	L	F	R	CPPC	3	0.000450315
85	CPPC	E	T	F	M	C	Y	W	T	R	F	I	C	E	R	E	L	R	CPPC	3	0.000450315
86	CPPC	E	R	V	C	S	S	F	W	R	F	W	C	E	I	D	G	S	CPPC	3	0.000450315
87	CPPC	E	G	Q	S	C	N	H	V	A	E	C	T	I	L	R	R	G	CPPC	3	0.000450315
88	CPPC	D	A	A	N	C	T	C	V	A	E	C	L	A	L	L	W	Y	CPPC	3	0.000450315
89	CPPC	D	V	F	R	C	G	T	F	L	E	C	W	T	W	V	S	R	CPPC	3	0.000450315
90	CPPC	A	R	L	P	C	G	M	R	G	E	R	C	C	T	P	G	R	CPPC	3	0.000450315
91	CPPC	A	Q	E	C	N	R	N	A	F	V	L	C	W	L	G	H	H	CPPC	3	0.000450315
92	CPPC	G	R	V	P	C	V	I	R	T	F	S	C	W	L	R	I	R	CPPC	3	0.000450315
93	CPPC	G	G	R	C	L	S	P	A	S	L	E	C	A	A	L	I	L	CPPC	3	0.000450315
94	CPPC	G	V	E	C	R	S	H	V	L	C	L	I	F	T	T	V	W	CPPC	3	0.000450315
95	CPPC	G	L	C	N	A	V	R	E	H	I	L	C	T	L	F	R	V	CPPC	3	0.000450315
96	CPPC	G	W	L	C	E	H	L	R	R	L	A	C	K	T	I	H	S	CPPC	3	0.000450315
97	CPPC	V	M	C	A	V	I	E	W	S	H	G	C	W	I	W	S	G	CPPC	3	0.000450315
98	CPPC	V	P	C	I	S	R	G	S	C	A	C	E	C	F	H	T	G	CPPC	3	0.000450315
99	CPPC	V	E	Y	P	C	A	L	F	H	Y	I	C	L	V	L	R	H	CPPC	3	0.000450315
100	CPPC	E	L	C	V	R	M	R	S	N	E	R	C	L	L	T	P	S	CPPC	3	0.000450315
101	CPPC	E	L	T	W	C	L	R	P	L	L	C	S	L	K	R	R	R	CPPC	3	0.000450315
102	CPPC	S	L	L	C	K	L	W	S	R	L	T	C	L	G	E	R	A	CPPC	3	0.000450315
103	CPPC	S	V	L	S	C	K	E	L	W	R	W	C	T	R	G	Y	W	CPPC	3	0.000450315
104	CPPC	S	R	G	S	C	R	L	T	E	W	L	C	S	W	C	A	Q	CPPC	3	0.000450315
105	CPPC	W	W	E	C	W	R	G	L	S	C	L	R	H	R	L	T	C	CPPC	3	0.000450315
106	CPPC	F	S	F	W	C	S	W	E	E	L	V	C	T	R	L	T	S	CPPC	3	0.000450315
107	CPPC	K	T	F	R	T	C	W	V	E	V	I	C	A	A	N	P	P	CPPC	3	0.000450315
108	CPPC	R	V	Q	S	A	C	R	T	F	A	Q	C	W	T	A	I	S	CPPC	3	0.000450315
109	CPPC	R	S	E	W	T	C	W	T	S	W	M	C	S	L	G	A	R	CPPC	3	0.000450315
110	CPPC	R	W	R	G	L	C	V	K	H	I	V	C	K	W	S	R	E	CPPC	3	0.000450315
111	CPPC	K	R	C	D	F	M	Q	G	C	N	Y	N	E	G	I	T	E	CPPC	2	0.00030021
112	CPPC	K	M	C	F	L	L	P	W	K	K	E	C	N	K	Y	M	K	CPPC	2	0.00030021
113	CPPC	K	G	G	C	I	P	A	D	G	Y	V	C	Y	W	S	E	L	CPPC	2	0.00030021
114	CPPC	K	G	G	C	I	P	A	D	G	F	V	S	Y	W	S	E	L	CPPC	2	0.00030021
115	CPPC	K	G	G	C	I	P	A	D	G	F	V	C	Y	W	S	E	R	CPPC	2	0.00030021
116	CPPC	K	E	M	R	C	K	I	R	A	A	M	C	W	L	R	K	D	CPPC	2	0.00030021
117	CPPC	K	S	C	H	S	G	E	S	T	F	W	C	Y	W	E	A	L	CPPC	2	0.00030021
118	CPPC	N	S	S	C	M	R	G	V	F	C	R	F	W	A	M	L	S	CPPC	2	0.00030021
119	CPPC	T	R	G	S	T	G	F	A	E	E	W	C	A	L	A	G	A	CPPC	2	0.00030021
120	CPPC	T	R	G	C	T	G	V	A	E	E	W	C	A	L	A	G	A	CPPC	2	0.00030021
121	CPPC	T	R	G	C	T	G	F	A	E	E	W	C	A	L	A	G	A	CPPC	2	0.00030021
122	CPPC	T	R	G	C	T	G	F	A	E	E	W	C	A	L	S	G	A	CPPC	2	0.00030021
123	CPPC	T	D	R	Y	C	R	W	W	L	L	C	A	A	L	G	R	L	CPPC	2	0.00030021
124	CPPC	T	V	E	C	V	H	E	L	S	C	G	S	T	Y	R	K	T	CPPC	2	0.00030021
125	CPPC	T	V	L	C	L	A	F	V	D	S	C	C	E	R	Q	F	L	CPPC	2	0.00030021
126	CPPC	T	W	C	W	S	A	G	L	E	R	F	C	R	W	L	P	W	CPPC	2	0.00030021
127	CPPC	T	F	E	G	C	E	G	D	Y	D	L	C	E	Y	R	V	H	CPPC	2	0.00030021
128	CPPC	T	V	F	E	C	H	W	V	Q	V	L	C	R	G	D	R	G	CPPC	2	0.00030021
129	CPPC	T	C	V	D	C	W	E	H	L	N	H	C	T	T	T	N	E	CPPC	2	0.00030021
130	CPPC	T	F	V	D	C	W	E	H	L	N	Q	C	T	T	T	N	E	CPPC	2	0.00030021
131	CPPC	T	F	V	D	C	W	E	H	L	N	H	C	T	T	T	N	E	CPPC	2	0.00030021
132	CPPC	R	H	F	C	E	W	F	F	R	G	R	C	D	H	T	A	P	CPPC	2	0.00030021
133	CPPC	R	A	C	R	L	Y	C	V	L	L	S	C	C	G	E	R	V	CPPC	2	0.00030021
134	CPPC	R	G	G	C	I	P	A	D	G	F	V	C	Y	W	S	E	L	CPPC	2	0.00030021
135	CPPC	R	V	C	F	A	L	Y	Y	R	E	L	C	F	R	F	R	A	CPPC	2	0.00030021
136	CPPC	R	Y	E	G	C	E	G	D	Y	D	L	C	E	Y	R	V	H	CPPC	2	0.00030021
137	CPPC	R	F	E	G	S	E	G	D	Y	D	L	C	E	Y	R	V	H	CPPC	2	0.00030021
138	CPPC	R	F	E	G	C	Q	G	D	Y	D	L	C	E	Y	R	V	H	CPPC	2	0.00030021
139	CPPC	R	F	E	G	C	E	G	D	N	D	L	C	E	Y	R	V	H	CPPC	2	0.00030021
140	CPPC	R	F	E	G	C	E	G	D	Y	D	L	C	E	Y	R	L	H	CPPC	2	0.00030021
141	CPPC	R	F	E	G	C	E	G	D	Y	D	L	C	E	Y	R	V	N	CPPC	2	0.00030021
142	CPPC	R	F	E	G	C	E	G	D	Y	D	L	C	E	Y	R	V	P	CPPC	2	0.00030021
143	CPPC	R	F	E	G	C	E	G	D	Y	D	L	C	E	Y	M	V	H	CPPC	2	0.00030021
144	CPPC	R	F	E	G	C	E	G	D	Y	D	V	C	E	Y	R	V	H	CPPC	2	0.00030021
145	CPPC	R	F	E	G	C	E	G	D	Y	V	L	C	E	Y	R	V	H	CPPC	2	0.00030021
146	CPPC	R	F	E	G	C	E	G	D	Y	Y	L	C	E	Y	R	V	H	CPPC	2	0.00030021
147	CPPC	R	F	E	G	C	E	G	D	S	D	L	C	E	Y	R	V	H	CPPC	2	0.00030021
148	CPPC	R	F	E	G	C	E	G	D	C	D	L	C	E	Y	R	V	H	CPPC	2	0.00030021
149	CPPC	R	F	E	V	C	E	G	D	Y	D	L	C	E	Y	R	V	H	CPPC	2	0.00030021
150	CPPC	R	F	E	W	C	E	G	D	Y	D	L	C	E	Y	R	V	H	CPPC	2	0.00030021
151	CPPC	S	T	G	C	K	F	V	T	V	D	K	C	R	T	V	N	E	CPPC	2	0.00030021
152	CPPC	S	L	A	E	C	V	W	R	Q	L	Q	C	A	L	R	A	Q	CPPC	2	0.00030021
153	CPPC	M	L	C	N	D	F	S	H	R	Q	T	C	E	S	D	K	P	CPPC	2	0.00030021
154	CPPC	I	R	E	C	A	T	D	S	M	S	V	C	G	P	K	Y	E	CPPC	2	0.00030021
155	CPPC	I	R	P	S	C	E	C	E	N	P	C	G	Y	G	W	R	C	CPPC	2	0.00030021
156	CPPC	I	R	G	L	C	N	S	V	G	G	T	C	E	L	M	F	E	CPPC	2	0.00030021
157	CPPC	I	A	C	V	L	F	G	E	C	A	P	P	I	S	Q	R	R	CPPC	2	0.00030021
158	CPPC	I	W	C	Y	T	W	L	K	K	K	R	C	I	A	N	E	R	CPPC	2	0.00030021
159	CPPC	I	C	C	L	H	R	V	R	E	S	C	C	S	E	L	A	P	CPPC	2	0.00030021
160	CPPC	H	T	V	S	C	E	L	E	S	L	C	S	V	F	Y	H	K	CPPC	2	0.00030021
161	CPPC	H	D	V	C	Y	F	S	E	G	D	E	C	V	I	L	I	E	CPPC	2	0.00030021
162	CPPC	H	F	L	K	C	S	E	W	L	R	A	C	S	L	W	R	P	CPPC	2	0.00030021
163	CPPC	P	P	L	E	C	H	P	Q	A	P	C	G	V	E	L	A	S	CPPC	2	0.00030021
164	CPPC	P	E	C	R	F	K	A	L	C	I	L	N	I	W	L	T	P	CPPC	2	0.00030021
165	CPPC	P	Q	D	C	P	G	Y	V	E	C	Y	L	P	V	L	S	A	CPPC	2	0.00030021
166	CPPC	P	R	P	E	C	W	P	L	M	W	V	C	Y	H	K	H	E	CPPC	2	0.00030021
167	CPPC	P	R	C	L	V	N	L	S	E	W	L	C	P	S	C	K	T	CPPC	2	0.00030021
168	CPPC	P	L	H	W	C	G	L	R	W	V	C	R	E	R	A	L	G	CPPC	2	0.00030021
169	CPPC	P	F	V	D	C	W	E	H	L	N	H	C	T	T	T	N	E	CPPC	2	0.00030021
170	CPPC	R	T	C	V	H	L	E	S	I	A	L	C	K	Y	A	K	S	CPPC	2	0.00030021
171	CPPC	R	Q	G	P	C	E	G	G	Y	E	C	M	E	L	S	R	E	CPPC	2	0.00030021
172	CPPC	R	P	C	R	L	A	V	N	C	G	H	L	R	T	A	L	E	CPPC	2	0.00030021
173	CPPC	R	P	C	V	C	K	E	V	Y	W	V	C	L	V	G	R	E	CPPC	2	0.00030021
174	CPPC	R	L	R	L	C	E	H	R	L	V	C	F	I	M	R	R	C	CPPC	2	0.00030021
175	CPPC	R	A	G	C	S	A	F	R	S	Y	L	C	R	W	L	L	A	CPPC	2	0.00030021
176	CPPC	R	Y	C	I	Q	V	S	R	F	A	W	C	W	E	E	L	H	CPPC	2	0.00030021
177	CPPC	R	L	A	R	C	G	L	L	P	E	S	C	C	R	N	M	R	CPPC	2	0.00030021
178	CPPC	R	N	W	C	V	N	W	V	R	R	F	C	L	P	F	A	T	CPPC	2	0.00030021
179	CPPC	R	T	E	F	C	V	R	L	K	L	C	R	W	A	L	F	R	CPPC	2	0.00030021
180	CPPC	R	P	V	C	G	G	P	M	E	C	F	L	Q	P	W	S	A	CPPC	2	0.00030021
181	CPPC	R	P	C	S	P	V	W	R	E	W	R	C	L	V	L	W	G	CPPC	2	0.00030021
182	CPPC	R	G	W	L	C	L	L	R	Y	T	C	E	M	L	R	H	S	CPPC	2	0.00030021
183	CPPC	R	E	P	R	C	D	R	C	D	T	W	C	R	L	L	R	V	CPPC	2	0.00030021
184	CPPC	R	W	V	G	C	V	R	P	W	L	E	C	L	A	W	A	S	CPPC	2	0.00030021
185	CPPC	L	L	R	G	C	E	W	I	R	Y	I	C	V	L	M	R	V	CPPC	2	0.00030021
186	CPPC	L	L	C	T	S	T	A	S	V	W	L	C	E	R	A	R	I	CPPC	2	0.00030021
187	CPPC	L	K	C	A	R	T	M	S	C	E	W	R	S	R	R	G	G	CPPC	2	0.00030021
188	CPPC	L	R	V	C	V	T	P	E	T	V	R	C	R	P	R	A	R	CPPC	2	0.00030021
189	CPPC	L	G	L	G	C	R	W	L	G	Q	L	C	A	A	W	N	E	CPPC	2	0.00030021
190	CPPC	E	R	G	E	C	P	A	G	E	C	V	C	G	L	A	L	S	CPPC	2	0.00030021
191	CPPC	E	S	W	A	C	E	W	R	V	L	T	C	R	V	L	L	V	CPPC	2	0.00030021
192	CPPC	E	W	I	C	R	M	R	F	M	W	E	C	W	L	T	S	P	CPPC	2	0.00030021
193	CPPC	A	V	E	C	G	H	S	W	W	F	H	C	M	I	G	L	G	CPPC	2	0.00030021
194	CPPC	A	E	C	T	E	V	V	Y	C	L	V	I	R	F	L	R	I	CPPC	2	0.00030021
195	CPPC	A	S	T	C	A	E	Y	E	P	R	T	C	L	M	L	S	S	CPPC	2	0.00030021
196	CPPC	G	T	F	C	M	G	L	V	R	F	E	C	L	V	L	S	V	CPPC	2	0.00030021
197	CPPC	G	R	A	C	R	Q	V	M	S	V	L	C	H	V	F	K	E	CPPC	2	0.00030021
198	CPPC	G	D	L	C	R	A	Y	L	L	I	E	C	L	L	G	G	Y	CPPC	2	0.00030021
199	CPPC	G	D	C	P	G	T	R	L	C	L	C	L	S	G	S	E	S	CPPC	2	0.00030021
200	CPPC	V	S	E	P	C	D	E	F	W	E	C	W	G	T	V	W	A	CPPC	2	0.00030021
201	CPPC	V	H	F	D	C	L	W	R	H	L	E	C	H	S	S	W	F	CPPC	2	0.00030021
202	CPPC	V	C	P	L	C	R	R	V	V	S	L	C	E	L	L	R	S	CPPC	2	0.00030021
203	CPPC	V	L	Y	C	D	L	T	L	W	D	E	C	P	F	T	L	H	CPPC	2	0.00030021
204	CPPC	V	A	E	C	E	A	V	Y	D	C	E	Q	E	E	V	E	F	CPPC	2	0.00030021
205	CPPC	V	G	L	S	C	L	V	V	G	W	H	C	R	L	G	G	E	CPPC	2	0.00030021
206	CPPC	E	R	R	C	A	S	V	R	T	W	V	C	R	V	L	R	P	CPPC	2	0.00030021
207	CPPC	E	R	A	W	C	L	F	I	Q	F	R	C	G	A	V	C	C	CPPC	2	0.00030021
208	CPPC	E	G	S	C	S	M	Y	C	E	L	C	C	F	I	D	T	D	CPPC	2	0.00030021
209	CPPC	E	S	S	H	S	G	E	S	T	F	W	C	Y	W	E	A	L	CPPC	2	0.00030021
210	CPPC	E	S	Q	T	C	V	S	F	L	G	C	W	A	E	L	A	S	CPPC	2	0.00030021
211	CPPC	E	S	Q	T	C	V	S	F	L	C	C	W	A	E	L	A	S	CPPC	2	0.00030021
212	CPPC	E	S	Q	S	C	V	S	F	L	G	C	W	A	E	L	A	S	CPPC	2	0.00030021
213	CPPC	E	W	C	F	K	H	A	F	P	R	Y	C	W	R	L	P	S	CPPC	2	0.00030021
214	CPPC	Y	S	L	R	C	I	T	E	W	W	I	C	R	T	R	A	R	CPPC	2	0.00030021
215	CPPC	Y	F	G	S	C	F	F	R	R	L	T	C	L	R	E	S	Q	CPPC	2	0.00030021
216	CPPC	S	H	P	C	E	Y	V	W	R	W	R	C	W	F	V	E	Y	CPPC	2	0.00030021
217	CPPC	S	L	G	C	P	R	H	N	S	C	D	E	S	V	C	V	S	CPPC	2	0.00030021
218	CPPC	S	D	N	C	L	V	V	D	E	D	G	C	A	Q	S	Y	V	CPPC	2	0.00030021
219	CPPC	S	G	V	L	C	R	V	V	R	A	V	C	G	V	R	S	E	CPPC	2	0.00030021
220	CPPC	S	E	C	C	R	S	S	V	C	R	H	F	T	L	W	M	L	CPPC	2	0.00030021
221	CPPC	S	F	R	W	H	C	L	W	P	W	E	C	H	S	E	H	R	CPPC	2	0.00030021
222	CPPC	S	F	H	C	V	R	S	E	W	I	L	C	P	G	A	A	C	CPPC	2	0.00030021
223	CPPC	S	M	E	W	C	V	L	A	R	V	L	C	T	V	S	H	H	CPPC	2	0.00030021
224	CPPC	S	P	T	A	C	H	L	T	L	E	C	V	Y	M	L	S	L	CPPC	2	0.00030021
225	CPPC	S	R	C	F	G	I	E	Y	L	L	R	C	P	R	V	W	F	CPPC	2	0.00030021
226	CPPC	S	R	F	L	C	H	W	G	E	V	L	C	W	V	R	G	R	CPPC	2	0.00030021
227	CPPC	S	G	R	E	C	L	W	L	H	L	L	C	R	M	R	L	G	CPPC	2	0.00030021
228	CPPC	S	L	P	E	C	L	I	G	G	W	L	C	H	L	L	S	R	CPPC	2	0.00030021
229	CPPC	W	D	V	Y	C	L	E	P	V	W	L	C	T	V	W	D	W	CPPC	2	0.00030021
230	CPPC	W	G	D	E	C	F	F	E	A	W	L	C	L	T	W	V	T	CPPC	2	0.00030021
231	CPPC	W	S	C	A	P	L	L	R	F	V	W	C	L	L	E	R	S	CPPC	2	0.00030021
232	CPPC	W	L	V	S	C	A	S	E	L	R	R	C	L	W	S	L	C	CPPC	2	0.00030021
233	CPPC	L	S	E	C	R	L	T	H	W	P	L	C	R	L	R	W	D	CPPC	2	0.00030021
234	CPPC	F	S	E	C	P	C	F	T	D	L	L	C	R	L	V	G	M	CPPC	2	0.00030021
235	CPPC	F	Y	H	C	I	L	R	I	A	L	E	C	I	F	T	G	E	CPPC	2	0.00030021
236	CPPC	M	T	K	C	F	G	E	D	V	C	R	V	F	L	I	T	E	CPPC	2	0.00030021
237	CPPC	R	S	G	C	V	R	G	Y	S	C	G	D	V	G	Y	Y	E	CPPC	2	0.00030021
238	CPPC	A	G	I	C	W	M	D	L	E	C	S	F	W	S	G	P	R	CPPC	2	0.00030021
239	CPPC	K	N	R	F	W	C	E	F	A	S	R	C	V	V	M	R	S	CPPC	2	0.00030021
240	CPPC	N	T	C	S	I	C	L	I	R	V	E	C	V	N	L	L	P	CPPC	2	0.00030021
241	CPPC	N	W	V	L	D	C	S	T	S	S	E	C	P	E	R	W	V	CPPC	2	0.00030021
242	CPPC	T	W	R	L	R	C	D	W	G	G	Y	C	M	E	S	H	A	CPPC	2	0.00030021
243	CPPC	M	T	F	W	E	C	W	T	R	L	M	C	D	R	P	T	S	CPPC	2	0.00030021
244	CPPC	R	V	R	A	F	C	I	I	L	H	I	C	H	K	I	S	E	CPPC	2	0.00030021
245	CPPC	R	Y	E	R	I	C	V	L	F	T	M	C	R	M	L	N	R	CPPC	2	0.00030021
246	CPPC	A	M	S	S	R	C	W	E	R	F	I	C	L	L	H	R	K	CPPC	2	0.00030021
247	CPPC	V	Y	T	L	R	C	E	L	F	Y	G	C	T	E	R	A	A	CPPC	2	0.00030021
248	CPPC	Y	F	T	L	R	C	T	W	L	G	D	C	W	T	E	P	L	CPPC	2	0.00030021
249	CPPC	S	V	R	W	H	C	L	W	P	W	E	C	H	S	E	H	R	CPPC	2	0.00030021
250	CPPC	W	I	R	R	V	C	E	I	V	L	P	C	R	T	G	P	P	CPPC	2	0.00030021
251	CPPC	F	E	F	Y	W	C	Q	I	Q	D	Q	C	I	T	T	S	S	CPPC	2	0.00030021
252	CPPC	F	E	F	Y	W	C	Q	I	Q	D	Q	C	I	T	R	S	S	CPPC	2	0.00030021
253	CPPC	T	F	V	D	C	W	E	H	L	N	H	C	T	T	T	N	E	CPPC	1	0.000150105
254	CPPC	E	S	Q	T	C	V	S	F	L	G	C	W	A	E	L	A	S	CPPC	1	0.000150105
255	CPPC	F	R	W	S	C	L	E	H	L	A	L	C	R	W	R	W	T	CPPC	1	0.000150105
256	CPPC	F	R	W	S	C	L	E	P	L	A	L	C	R	W	R	W	T	CPPC	1	0.000150105
257	CPPC	N	G	G	C	I	P	A	D	G	F	V	C	Y	W	S	E	L	CPPC	1	0.000150105
258	CPPC	N	E	M	R	C	K	I	R	A	A	M	C	W	L	R	K	D	CPPC	1	0.000150105
259	CPPC	K	K	C	N	N	T	H	K	T	G	N	C	K	K	G	K	K	CPPC	1	0.000150105
260	CPPC	K	H	A	C	K	R	L	T	W	L	V	C	E	W	R	L	P	CPPC	1	0.000150105
261	CPPC	K	R	L	R	C	L	W	P	P	P	C	A	I	R	N	D	Q	CPPC	1	0.000150105
262	CPPC	K	R	L	R	C	L	W	P	P	P	C	A	I	R	T	D	Q	CPPC	1	0.000150105
263	CPPC	K	G	V	G	C	W	E	R	W	A	C	*	L	L	E	G	C	CPPC	1	0.000150105
264	CPPC	K	G	E	C	T	R	C	A	S	C	P	S	T	A	K	L	R	CPPC	1	0.000150105
265	CPPC	K	G	R	C	I	P	A	D	G	F	V	C	Y	W	S	E	L	CPPC	1	0.000150105
266	CPPC	K	G	G	C	N	P	A	D	G	F	D	C	Y	W	S	E	L	CPPC	1	0.000150105
267	CPPC	K	G	G	C	I	P	A	D	G	V	V	C	Y	W	S	E	L	CPPC	1	0.000150105
268	CPPC	K	G	G	C	I	P	A	D	G	F	V	G	Y	W	S	E	L	CPPC	1	0.000150105
269	CPPC	K	G	G	C	I	P	A	D	G	F	V	C	N	W	S	E	L	CPPC	1	0.000150105
270	CPPC	K	G	G	C	I	P	A	D	G	F	V	C	Y	W	S	Y	L	CPPC	1	0.000150105
271	CPPC	K	G	G	C	I	P	A	D	G	F	V	C	Y	W	S	E	L	CPPC	1	0.000150105
272	CPPC	K	G	G	C	I	P	A	D	G	F	V	C	Y	W	S	E	L	CPPC	1	0.000150105
273	CPPC	K	G	G	C	I	P	A	D	V	F	V	C	Y	W	S	E	L	CPPC	1	0.000150105
274	CPPC	K	G	G	F	I	P	A	D	G	F	V	C	Y	W	S	E	L	CPPC	1	0.000150105
275	CPPC	K	G	C	H	E	P	H	K	H	K	S	C	N	R	K	G	K	CPPC	1	0.000150105
276	CPPC	K	V	F	R	C	W	R	S	L	K	T	C	L	I	N	R	Y	CPPC	1	0.000150105
277	CPPC	K	E	Q	V	C	G	T	I	A	Y	I	C	E	M	L	H	K	CPPC	1	0.000150105
278	CPPC	N	R	N	T	C	E	S	Q	P	D	C	P	N	N	K	E	Y	CPPC	1	0.000150105
279	CPPC	N	I	C	R	L	M	H	V	H	R	I	C	E	F	F	G	R	CPPC	1	0.000150105
280	CPPC	N	P	P	C	S	D	E	W	I	C	R	L	W	S	R	H	G	CPPC	1	0.000150105
281	CPPC	N	A	L	E	C	L	R	L	Y	R	L	C	R	H	V	G	F	CPPC	1	0.000150105
282	CPPC	N	F	V	D	C	W	E	H	L	N	H	C	T	T	T	N	E	CPPC	1	0.000150105
283	CPPC	T	F	L	D	C	W	E	H	L	N	H	C	T	T	T	N	E	CPPC	1	0.000150105
284	CPPC	T	S	E	C	S	W	P	W	I	W	Y	C	A	F	V	L	E	CPPC	1	0.000150105
285	CPPC	T	R	G	C	T	G	F	A	E	E	W	C	A	L	A	G	A	CPPC	1	0.000150105
286	CPPC	T	R	Y	E	C	L	M	L	A	L	A	C	H	A	G	R	L	CPPC	1	0.000150105
287	CPPC	T	R	G	C	T	G	F	A	E	E	W	C	A	L	A	G	A	CPPC	1	0.000150105
288	CPPC	T	R	G	C	T	G	F	A	E	E	W	C	A	L	A	G	A	CPPC	1	0.000150105
289	CPPC	T	R	G	C	T	G	F	A	E	E	W	C	A	L	A	G	A	CPPC	1	0.000150105
290	CPPC	T	R	G	C	T	G	Y	A	E	E	W	C	A	L	A	G	A	CPPC	1	0.000150105
291	CPPC	T	R	G	C	T	G	F	A	K	E	W	C	A	L	A	G	A	CPPC	1	0.000150105
292	CPPC	T	R	G	C	T	G	F	A	E	E	W	C	A	L	A	G	A	CPPC	1	0.000150105
293	CPPC	T	R	G	C	T	G	F	A	E	E	W	C	A	L	A	G	A	CPPC	1	0.000150105
294	CPPC	T	R	G	C	T	G	F	A	E	E	W	C	A	L	A	G	S	CPPC	1	0.000150105
295	CPPC	T	R	G	C	T	G	F	A	E	E	W	C	A	L	A	V	A	CPPC	1	0.000150105
296	CPPC	T	R	G	C	T	G	F	A	E	E	W	C	A	L	A	G	A	CPPC	1	0.000150105
297	CPPC	T	R	G	C	T	G	F	A	E	E	W	C	A	L	A	G	A	CPPC	1	0.000150105
298	CPPC	T	R	V	C	L	E	S	F	R	L	L	C	L	L	V	G	K	CPPC	1	0.000150105
299	CPPC	T	V	W	C	P	E	S	C	P	E	L	C	V	C	D	E	S	CPPC	1	0.000150105
300	CPPC	T	V	W	C	P	E	S	C	P	G	L	C	V	C	D	E	S	CPPC	1	0.000150105
301	CPPC	T	V	L	E	C	I	L	T	W	T	A	C	A	L	T	G	S	CPPC	1	0.000150105
302	CPPC	T	E	L	L	C	M	L	R	R	P	M	C	R	H	S	P	Y	CPPC	1	0.000150105
303	CPPC	T	T	F	L	C	L	P	A	R	G	P	C	I	L	W	T	E	CPPC	1	0.000150105
304	CPPC	T	I	V	D	C	W	E	H	L	N	H	C	T	T	T	N	E	CPPC	1	0.000150105
305	CPPC	T	I	E	C	V	E	F	W	F	A	R	C	L	V	N	Y	R	CPPC	1	0.000150105
306	CPPC	T	P	P	G	C	K	G	A	R	R	E	C	A	M	L	L	G	CPPC	1	0.000150105
307	CPPC	T	R	Q	P	C	A	R	L	S	R	L	C	E	F	I	A	G	CPPC	1	0.000150105
308	CPPC	T	V	V	D	C	W	E	H	L	N	H	C	T	T	T	N	E	CPPC	1	0.000150105
309	CPPC	T	V	V	D	C	W	E	H	L	N	H	C	T	T	T	H	E	CPPC	1	0.000150105
310	CPPC	T	F	V	H	C	W	E	H	L	N	H	C	T	T	T	N	E	CPPC	1	0.000150105
311	CPPC	T	F	V	E	C	W	E	H	L	N	H	C	T	T	T	N	E	CPPC	1	0.000150105
312	CPPC	T	F	V	D	C	R	E	H	L	N	Q	C	T	T	T	N	E	CPPC	1	0.000150105
313	CPPC	T	F	V	D	C	W	E	Q	L	N	H	C	T	T	T	N	E	CPPC	1	0.000150105
314	CPPC	T	F	V	D	C	W	E	H	H	N	H	C	T	T	P	N	E	CPPC	1	0.000150105
315	CPPC	T	F	V	D	C	W	E	H	L	N	Q	C	T	T	T	N	E	CPPC	1	0.000150105
316	CPPC	T	F	V	D	C	W	E	H	L	N	H	S	T	T	T	N	E	CPPC	1	0.000150105
317	CPPC	T	F	V	D	C	W	E	H	L	N	H	G	T	T	T	N	E	CPPC	1	0.000150105
318	CPPC	T	F	V	D	C	W	E	H	L	N	H	C	T	T	N	N	E	CPPC	1	0.000150105
319	CPPC	T	F	V	D	C	W	E	H	L	N	H	C	T	T	T	K	E	CPPC	1	0.000150105
320	CPPC	T	F	V	D	C	W	E	H	L	N	H	C	T	T	T	N	E	CPPC	1	0.000150105
321	CPPC	T	F	V	D	C	W	E	H	L	N	H	C	T	T	T	N	L	CPPC	1	0.000150105
322	CPPC	T	F	V	D	C	W	E	H	L	N	H	C	T	T	T	I	E	CPPC	1	0.000150105
323	CPPC	T	F	V	D	C	W	E	H	L	N	H	C	T	T	T	Q	E	CPPC	1	0.000150105
324	CPPC	T	F	V	D	C	W	E	H	L	N	H	C	T	T	T	H	E	CPPC	1	0.000150105
325	CPPC	T	F	V	D	C	W	E	H	L	N	H	C	T	T	P	N	E	CPPC	1	0.000150105
326	CPPC	T	F	V	D	C	W	E	H	L	N	H	W	T	T	T	N	E	CPPC	1	0.000150105
327	CPPC	T	F	V	D	C	W	G	H	L	N	H	C	T	T	T	N	E	CPPC	1	0.000150105
328	CPPC	T	F	V	D	C	L	E	H	L	N	H	C	T	T	T	N	E	CPPC	1	0.000150105
329	CPPC	T	F	V	A	C	W	E	H	L	N	H	C	T	T	T	N	E	CPPC	1	0.000150105
330	CPPC	T	F	V	D	C	W	E	H	L	N	H	C	T	T	T	N	K	CPPC	1	0.000150105
331	CPPC	T	F	V	D	C	W	E	H	L	N	H	C	T	T	T	N	E	CPPC	1	0.000150105
332	CPPC	R	T	C	D	P	P	A	W	E	G	E	C	L	E	T	V	G	CPPC	1	0.000150105
333	CPPC	R	I	E	G	C	E	G	D	Y	D	L	C	E	Y	R	V	H	CPPC	1	0.000150105
334	CPPC	R	R	L	Y	C	H	A	V	P	E	L	C	A	R	T	R	L	CPPC	1	0.000150105
335	CPPC	R	L	M	L	C	P	V	R	W	L	C	E	W	M	V	V	A	CPPC	1	0.000150105
336	CPPC	R	A	C	L	R	V	H	F	G	R	L	C	A	A	M	G	L	CPPC	1	0.000150105
337	CPPC	R	G	C	C	K	L	T	S	Q	Y	E	C	W	D	V	P	H	CPPC	1	0.000150105
338	CPPC	R	G	F	C	T	L	F	R	V	C	E	W	T	R	L	C	P	CPPC	1	0.000150105
339	CPPC	R	V	C	Y	A	L	Y	Y	R	E	L	C	F	R	F	R	A	CPPC	1	0.000150105
340	CPPC	R	V	W	M	C	W	E	R	L	V	C	E	A	V	G	G	K	CPPC	1	0.000150105
341	CPPC	R	V	E	G	C	E	G	D	Y	D	L	C	E	Y	R	V	P	CPPC	1	0.000150105
342	CPPC	R	V	E	G	C	E	G	D	Y	D	L	C	A	Y	R	V	H	CPPC	1	0.000150105
343	CPPC	R	V	S	C	V	T	A	Y	L	E	F	C	A	F	H	R	R	CPPC	1	0.000150105
344	CPPC	R	V	C	H	S	T	Q	E	C	E	R	N	E	P	F	V	P	CPPC	1	0.000150105
345	CPPC	R	C	E	G	C	E	G	D	Y	D	L	C	E	Y	S	V	H	CPPC	1	0.000150105
346	CPPC	R	L	E	G	C	E	G	D	Y	D	L	C	E	Y	R	V	H	CPPC	1	0.000150105
347	CPPC	R	L	E	G	C	E	G	D	Y	D	L	C	E	S	R	V	H	CPPC	1	0.000150105
348	CPPC	R	F	K	G	C	E	G	D	Y	D	L	C	E	Y	S	V	H	CPPC	1	0.000150105
349	CPPC	R	F	K	G	C	E	G	D	Y	D	L	C	E	Y	R	V	H	CPPC	1	0.000150105
350	CPPC	R	F	R	W	H	C	L	W	P	W	E	C	H	S	E	H	R	CPPC	1	0.000150105
351	CPPC	R	F	E	R	C	E	G	D	Y	D	L	C	E	Y	R	V	H	CPPC	1	0.000150105
352	CPPC	R	F	E	E	C	E	G	D	Y	D	L	C	E	Y	R	V	H	CPPC	1	0.000150105
353	CPPC	R	F	E	A	C	E	G	D	Y	D	L	C	E	Y	R	V	H	CPPC	1	0.000150105
354	CPPC	R	F	E	G	Y	E	G	D	Y	D	L	C	E	Y	R	V	H	CPPC	1	0.000150105
355	CPPC	R	F	E	G	S	E	G	D	Y	D	L	C	E	Y	R	V	H	CPPC	1	0.000150105
356	CPPC	R	F	E	G	*	E	G	D	Y	D	L	C	E	Y	R	V	H	CPPC	1	0.000150105
357	CPPC	R	F	E	G	C	E	G	H	Y	D	L	C	E	Y	R	V	H	CPPC	1	0.000150105
358	CPPC	R	F	E	G	C	E	G	E	Y	D	L	C	E	Y	R	V	H	CPPC	1	0.000150105
359	CPPC	R	F	E	G	C	E	G	D	*	D	L	C	E	Y	R	V	H	CPPC	1	0.000150105
360	CPPC	R	F	E	G	C	E	G	D	Y	E	L	C	E	Y	R	V	H	CPPC	1	0.000150105
361	CPPC	R	F	E	G	C	E	G	D	Y	D	M	S	E	Y	R	V	H	CPPC	1	0.000150105
362	CPPC	R	F	E	G	C	E	G	D	Y	D	R	C	E	Y	R	V	H	CPPC	1	0.000150105
363	CPPC	R	F	E	G	C	E	G	D	Y	D	L	*	E	Y	R	V	H	CPPC	1	0.000150105
364	CPPC	R	F	E	G	C	E	G	D	Y	D	L	C	D	Y	R	V	H	CPPC	1	0.000150105
365	CPPC	R	F	E	G	C	E	G	D	Y	D	L	C	E	H	R	V	H	CPPC	1	0.000150105
366	CPPC	R	F	E	G	C	E	G	D	Y	D	L	C	E	D	R	V	H	CPPC	1	0.000150105
367	CPPC	R	F	E	G	C	E	G	D	Y	D	L	C	E	*	R	V	H	CPPC	1	0.000150105
368	CPPC	R	F	E	G	C	E	G	D	Y	D	L	C	E	E	R	V	H	CPPC	1	0.000150105
369	CPPC	R	F	E	G	C	E	G	D	Y	D	L	C	E	Y	T	V	H	CPPC	1	0.000150105
370	CPPC	R	F	E	G	C	E	G	D	Y	D	L	C	E	Y	S	V	H	CPPC	1	0.000150105
371	CPPC	R	F	E	G	C	E	G	D	Y	D	L	C	E	Y	R	M	H	CPPC	1	0.000150105
372	CPPC	R	F	E	G	C	E	G	D	Y	D	L	C	E	Y	R	V	Q	CPPC	1	0.000150105
373	CPPC	R	F	E	G	C	E	G	D	Y	D	L	C	E	Y	R	V	L	CPPC	1	0.000150105
374	CPPC	R	F	E	G	C	E	G	D	Y	D	L	C	E	Y	S	V	H	CPPC	1	0.000150105
375	CPPC	R	F	E	G	C	E	G	D	Y	D	L	C	V	Y	R	V	H	CPPC	1	0.000150105
376	CPPC	R	F	E	G	C	E	G	D	Y	D	L	W	E	Y	R	V	H	CPPC	1	0.000150105
377	CPPC	R	F	E	G	C	E	G	A	Y	D	L	C	E	Y	R	V	H	CPPC	1	0.000150105
378	CPPC	R	F	E	G	C	E	V	E	Y	D	L	C	E	Y	R	V	H	CPPC	1	0.000150105
379	CPPC	R	F	E	G	W	E	G	D	Y	D	L	C	E	Y	R	V	H	CPPC	1	0.000150105
380	CPPC	R	F	E	W	C	E	G	D	Y	D	L	C	E	S	R	V	H	CPPC	1	0.000150105
381	CPPC	R	F	Y	G	C	E	G	D	Y	D	L	C	E	Y	R	V	H	CPPC	1	0.000150105
382	CPPC	R	F	L	G	C	E	G	D	Y	D	L	C	E	Y	R	V	H	CPPC	1	0.000150105
383	CPPC	S	T	R	A	C	P	S	F	R	S	C	W	L	N	L	T	S	CPPC	1	0.000150105
384	CPPC	S	T	G	C	K	F	G	T	V	D	K	C	R	T	V	N	E	CPPC	1	0.000150105
385	CPPC	S	R	L	C	E	W	G	Q	W	C	F	W	M	A	A	H	W	CPPC	1	0.000150105
386	CPPC	S	Q	C	E	L	R	F	E	C	C	R	S	G	M	V	S	W	CPPC	1	0.000150105
387	CPPC	S	R	R	C	L	M	R	I	G	P	M	C	E	V	S	A	H	CPPC	1	0.000150105
388	CPPC	S	R	C	A	C	A	E	R	Y	C	L	C	L	H	G	G	T	CPPC	1	0.000150105
389	CPPC	S	R	S	F	C	R	V	L	D	R	L	C	N	V	S	R	R	CPPC	1	0.000150105
390	CPPC	S	R	C	L	L	T	G	Q	I	E	C	C	G	M	R	C	E	CPPC	1	0.000150105
391	CPPC	S	L	G	C	E	P	S	Y	L	W	V	C	A	V	L	L	L	CPPC	1	0.000150105
392	CPPC	S	E	R	G	C	V	V	S	W	M	C	T	R	V	K	S	L	CPPC	1	0.000150105
393	CPPC	S	E	R	G	C	V	V	S	W	M	C	T	R	V	K	C	L	CPPC	1	0.000150105
394	CPPC	S	F	E	G	C	E	G	D	Y	D	L	C	E	*	R	V	H	CPPC	1	0.000150105
395	CPPC	M	G	V	H	C	L	W	P	W	L	R	C	S	M	L	R	E	CPPC	1	0.000150105
396	CPPC	M	L	C	K	F	V	L	R	V	Y	D	C	A	P	W	R	E	CPPC	1	0.000150105
397	CPPC	I	K	H	E	C	W	A	W	P	R	A	C	W	R	W	V	S	CPPC	1	0.000150105
398	CPPC	I	R	P	W	C	S	L	F	R	P	L	C	A	W	L	G	E	CPPC	1	0.000150105
399	CPPC	I	R	M	C	E	A	Q	W	L	P	E	C	I	L	N	F	F	CPPC	1	0.000150105
400	CPPC	I	G	P	N	C	A	V	R	A	R	C	W	L	E	P	D	K	CPPC	1	0.000150105
401	CPPC	I	E	C	S	A	E	S	G	P	V	G	C	Q	S	D	A	V	CPPC	1	0.000150105
402	CPPC	Q	R	K	C	E	F	M	A	F	W	R	C	L	S	A	E	G	CPPC	1	0.000150105
403	CPPC	Q	L	C	R	I	T	W	V	R	R	L	C	E	L	Y	A	V	CPPC	1	0.000150105
404	CPPC	Q	E	C	Q	T	F	S	E	C	E	E	A	K	N	K	M	M	CPPC	1	0.000150105
405	CPPC	Q	D	L	G	C	T	R	F	V	D	C	W	E	L	L	S	G	CPPC	1	0.000150105
406	CPPC	Q	D	L	G	C	T	R	V	V	D	C	W	E	L	L	S	G	CPPC	1	0.000150105
407	CPPC	Q	D	L	G	C	T	R	F	V	D	*	W	E	L	L	S	G	CPPC	1	0.000150105
408	CPPC	Q	D	L	G	C	T	R	F	V	D	C	W	E	L	E	S	G	CPPC	1	0.000150105
409	CPPC	Q	A	E	R	C	T	A	R	A	I	C	F	V	V	A	L	V	CPPC	1	0.000150105
410	CPPC	Q	G	G	C	I	P	A	D	G	F	V	C	Y	W	S	E	L	CPPC	1	0.000150105
411	CPPC	Q	V	G	C	V	T	L	F	G	R	W	C	R	G	E	R	L	CPPC	1	0.000150105
412	CPPC	Q	Y	W	C	S	L	E	R	I	C	G	R	H	G	W	T	F	CPPC	1	0.000150105
413	CPPC	Q	S	W	W	C	R	S	I	E	S	V	C	R	G	L	R	W	CPPC	1	0.000150105
414	CPPC	Q	F	P	C	S	T	Q	G	E	Q	E	C	R	H	G	L	A	CPPC	1	0.000150105
415	CPPC	H	T	S	C	S	L	R	L	A	V	W	C	K	L	F	R	E	CPPC	1	0.000150105
416	CPPC	H	T	S	C	S	L	W	L	A	V	C	C	K	L	F	R	E	CPPC	1	0.000150105
417	CPPC	H	P	R	C	R	G	L	I	E	L	V	C	S	W	H	W	F	CPPC	1	0.000150105
418	CPPC	H	D	G	C	Y	F	S	E	G	D	E	C	L	I	L	I	E	CPPC	1	0.000150105
419	CPPC	H	D	V	C	Y	F	Y	E	G	D	E	C	L	I	L	I	E	CPPC	1	0.000150105
420	CPPC	H	D	V	C	Y	F	S	E	G	D	E	C	L	I	M	I	E	CPPC	1	0.000150105
421	CPPC	H	D	V	C	Y	F	S	E	G	D	E	C	L	I	L	S	E	CPPC	1	0.000150105
422	CPPC	H	A	L	C	T	W	V	A	R	M	E	C	L	V	G	L	R	CPPC	1	0.000150105
423	CPPC	H	G	V	R	C	V	L	A	V	V	R	C	W	A	A	G	E	CPPC	1	0.000150105
424	CPPC	H	G	F	D	C	L	F	R	R	I	W	C	N	N	C	E	C	CPPC	1	0.000150105
425	CPPC	H	G	R	E	C	I	V	M	V	V	M	C	T	L	H	H	Q	CPPC	1	0.000150105
426	CPPC	H	S	T	C	T	T	P	T	R	M	E	C	F	S	M	P	E	CPPC	1	0.000150105
427	CPPC	H	W	S	C	D	S	F	M	W	C	W	E	E	L	L	H	K	CPPC	1	0.000150105
428	CPPC	H	W	W	L	C	S	R	L	P	S	M	C	A	L	L	R	E	CPPC	1	0.000150105
429	CPPC	H	L	L	E	C	M	W	F	I	L	T	C	G	R	E	D	G	CPPC	1	0.000150105
430	CPPC	P	R	R	E	C	W	T	L	F	N	C	T	A	A	R	S	K	CPPC	1	0.000150105
431	CPPC	P	R	R	E	C	W	T	L	F	N	C	T	A	A	R	C	K	CPPC	1	0.000150105
432	CPPC	P	A	D	C	E	R	R	G	W	M	G	C	G	A	G	Y	E	CPPC	1	0.000150105
433	CPPC	P	S	L	C	S	R	L	M	R	Y	L	C	R	A	T	H	F	CPPC	1	0.000150105
434	CPPC	P	W	T	W	C	P	L	G	L	S	E	C	W	L	G	G	W	CPPC	1	0.000150105
435	CPPC	P	T	W	W	C	T	A	K	L	W	L	C	Q	Y	K	D	R	CPPC	1	0.000150105
436	CPPC	P	Q	D	C	P	G	Y	V	E	C	Y	L	P	V	L	S	A	CPPC	1	0.000150105
437	CPPC	P	G	C	W	T	L	S	D	L	Q	T	C	D	K	M	E	Q	CPPC	1	0.000150105
438	CPPC	R	M	A	L	C	Y	R	E	R	L	L	C	W	L	R	A	W	CPPC	1	0.000150105
439	CPPC	R	Q	A	C	L	P	F	W	R	E	F	C	M	R	T	A	L	CPPC	1	0.000150105
440	CPPC	R	Q	L	L	C	L	Y	W	R	V	C	E	G	W	A	I	R	CPPC	1	0.000150105
441	CPPC	R	H	A	R	C	L	Y	E	L	L	W	C	R	M	T	C	R	CPPC	1	0.000150105
442	CPPC	R	R	P	H	C	V	W	I	H	L	E	C	I	S	R	F	R	CPPC	1	0.000150105
443	CPPC	R	R	L	Y	C	Q	L	E	V	V	I	C	S	L	T	R	S	CPPC	1	0.000150105
444	CPPC	R	L	S	W	C	W	H	L	S	E	R	C	G	M	R	V	R	CPPC	1	0.000150105
445	CPPC	R	L	L	E	C	S	Y	L	L	W	R	C	W	A	R	R	V	CPPC	1	0.000150105
446	CPPC	R	A	P	C	W	A	D	E	P	C	A	S	N	V	A	E	C	CPPC	1	0.000150105
447	CPPC	R	V	V	C	L	L	V	R	E	T	E	C	E	Y	R	H	T	CPPC	1	0.000150105
448	CPPC	R	V	C	W	Q	V	C	R	G	C	E	C	A	P	G	R	V	CPPC	1	0.000150105
449	CPPC	R	S	C	H	C	W	W	A	R	A	Q	C	T	E	G	L	S	CPPC	1	0.000150105
450	CPPC	R	S	L	L	C	H	L	V	R	E	L	C	I	G	E	W	G	CPPC	1	0.000150105
451	CPPC	R	S	F	H	C	W	W	A	R	A	Q	C	T	E	G	L	S	CPPC	1	0.000150105
452	CPPC	R	S	R	T	C	F	A	L	E	I	R	C	L	F	R	N	W	CPPC	1	0.000150105
453	CPPC	R	S	R	T	C	F	A	L	E	I	R	C	L	F	R	I	W	CPPC	1	0.000150105
454	CPPC	R	S	R	T	C	F	A	L	L	I	R	C	L	F	R	I	W	CPPC	1	0.000150105
455	CPPC	R	W	C	A	W	L	H	R	C	E	S	S	T	E	Q	G	H	CPPC	1	0.000150105
456	CPPC	R	T	L	C	F	G	P	G	C	T	R	C	V	E	W	F	V	CPPC	1	0.000150105
457	CPPC	R	T	R	S	C	V	R	W	A	M	E	C	L	W	H	H	S	CPPC	1	0.000150105
458	CPPC	R	T	L	C	E	L	W	Y	V	L	L	C	E	A	S	G	G	CPPC	1	0.000150105
459	CPPC	R	T	C	S	W	L	K	Y	F	L	L	C	R	G	E	A	S	CPPC	1	0.000150105
460	CPPC	R	T	W	C	R	L	V	L	A	Y	L	C	G	R	T	T	K	CPPC	1	0.000150105
461	CPPC	R	S	V	V	C	L	M	R	L	P	S	C	F	I	W	R	E	CPPC	1	0.000150105
462	CPPC	R	M	M	E	C	L	V	A	V	L	G	C	T	L	M	G	G	CPPC	1	0.000150105
463	CPPC	R	I	R	C	L	V	V	K	L	C	Y	V	I	L	A	P	E	CPPC	1	0.000150105
464	CPPC	R	I	L	C	C	I	T	H	W	E	R	C	A	L	R	S	R	CPPC	1	0.000150105
465	CPPC	R	P	Y	C	W	V	T	E	S	S	F	C	V	V	W	E	V	CPPC	1	0.000150105
466	CPPC	R	P	D	C	W	V	T	E	S	S	F	C	V	V	W	E	V	CPPC	1	0.000150105
467	CPPC	R	P	Y	C	W	V	T	E	S	S	F	C	V	V	W	E	V	CPPC	1	0.000150105
468	CPPC	R	R	E	V	C	M	T	C	L	E	T	C	E	S	R	P	Q	CPPC	1	0.000150105
469	CPPC	R	R	C	L	L	A	W	M	C	L	V	H	V	R	G	S	R	CPPC	1	0.000150105
470	CPPC	R	R	G	L	C	V	L	Q	I	A	C	E	L	W	P	A	R	CPPC	1	0.000150105
471	CPPC	R	R	Y	E	C	N	W	R	Q	L	L	C	Y	V	P	S	E	CPPC	1	0.000150105
472	CPPC	R	A	A	C	S	Q	A	R	G	A	E	C	C	D	G	Y	I	CPPC	1	0.000150105
473	CPPC	R	A	W	Y	C	V	L	V	P	R	S	C	R	E	T	R	A	CPPC	1	0.000150105
474	CPPC	R	G	R	V	C	M	L	L	P	R	L	C	E	P	S	P	V	CPPC	1	0.000150105
475	CPPC	R	V	W	D	C	R	R	E	E	I	C	E	I	T	E	V	Q	CPPC	1	0.000150105
476	CPPC	R	E	C	L	W	G	V	F	S	W	L	C	P	R	V	M	C	CPPC	1	0.000150105
477	CPPC	R	Y	C	P	E	R	V	W	C	L	L	A	R	S	W	S	C	CPPC	1	0.000150105
478	CPPC	R	L	S	C	E	V	I	R	R	V	I	C	Y	I	Y	R	N	CPPC	1	0.000150105
479	CPPC	R	F	C	R	L	E	H	W	L	L	G	C	H	V	R	V	V	CPPC	1	0.000150105
480	CPPC	L	I	C	Q	L	S	E	L	A	R	G	C	E	W	L	F	Q	CPPC	1	0.000150105
481	CPPC	L	P	L	E	C	L	C	V	E	P	E	C	L	S	D	I	S	CPPC	1	0.000150105
482	CPPC	L	R	C	G	L	L	A	R	V	F	R	C	W	K	P	P	R	CPPC	1	0.000150105
483	CPPC	L	E	C	M	R	E	K	C	K	C	L	C	L	F	P	E	R	CPPC	1	0.000150105
484	CPPC	L	V	C	Y	K	W	H	K	C	P	E	W	I	F	T	Q	I	CPPC	1	0.000150105
485	CPPC	L	V	C	Y	K	W	H	K	C	P	E	W	I	L	T	K	I	CPPC	1	0.000150105
486	CPPC	L	S	R	C	V	S	F	V	E	C	W	M	G	V	I	E	S	CPPC	1	0.000150105
487	CPPC	L	E	C	W	G	P	R	W	C	G	S	W	W	Y	R	H	L	CPPC	1	0.000150105
488	CPPC	E	T	C	H	S	G	E	S	T	F	W	C	Y	W	E	A	L	CPPC	1	0.000150105
489	CPPC	E	R	S	C	R	L	W	A	E	C	G	K	W	F	A	L	L	CPPC	1	0.000150105
490	CPPC	E	R	V	C	Q	W	G	G	W	A	F	C	M	F	V	G	E	CPPC	1	0.000150105
491	CPPC	E	L	V	C	D	F	P	L	W	G	V	C	L	P	N	P	E	CPPC	1	0.000150105
492	CPPC	E	D	L	N	C	L	E	G	T	E	F	C	N	R	R	T	V	CPPC	1	0.000150105
493	CPPC	E	D	S	C	P	E	F	V	W	L	W	C	V	C	P	H	N	CPPC	1	0.000150105
494	CPPC	E	G	Q	T	C	L	E	N	W	E	C	S	A	I	S	K	G	CPPC	1	0.000150105
495	CPPC	E	S	W	A	C	E	W	R	V	L	T	C	R	G	L	L	V	CPPC	1	0.000150105
496	CPPC	D	L	S	L	C	W	I	H	N	E	C	G	R	H	E	M	S	CPPC	1	0.000150105
497	CPPC	D	A	A	N	C	T	C	V	A	E	C	L	A	L	W	W	Y	CPPC	1	0.000150105
498	CPPC	D	V	F	R	C	G	T	F	L	E	C	W	T	W	V	S	R	CPPC	1	0.000150105
499	CPPC	D	E	C	D	A	P	L	G	C	D	V	A	L	S	A	L	R	CPPC	1	0.000150105
500	CPPC	D	L	A	C	T	L	W	A	E	C	L	A	Q	W	L	G	R	CPPC	1	0.000150105
501	CPPC	A	T	W	H	C	E	V	V	E	F	C	V	H	L	V	G	S	CPPC	1	0.000150105
502	CPPC	A	T	C	M	I	A	M	L	G	A	Y	C	F	S	L	V	E	CPPC	1	0.000150105
503	CPPC	A	I	R	M	C	E	W	W	K	L	C	R	S	P	Y	L	K	CPPC	1	0.000150105
504	CPPC	A	P	A	G	C	A	L	Y	L	L	C	E	F	G	R	L	H	CPPC	1	0.000150105
505	CPPC	A	Q	E	R	N	R	N	A	F	V	L	C	W	L	G	H	H	CPPC	1	0.000150105
506	CPPC	A	L	C	S	S	R	I	Y	R	L	A	C	L	V	Y	R	E	CPPC	1	0.000150105
507	CPPC	A	A	P	W	C	G	R	T	E	E	C	A	R	T	P	G	G	CPPC	1	0.000150105
508	CPPC	A	G	K	R	C	T	R	S	G	E	C	D	V	V	R	C	R	CPPC	1	0.000150105
509	CPPC	A	V	F	E	C	A	P	L	P	M	C	G	W	V	L	W	R	CPPC	1	0.000150105
510	CPPC	A	E	C	P	Y	T	L	L	R	L	I	C	C	S	L	G	Y	CPPC	1	0.000150105
511	CPPC	A	E	C	E	R	W	F	N	C	R	V	S	L	C	L	F	R	CPPC	1	0.000150105
512	CPPC	A	S	R	K	C	L	R	P	S	S	C	F	G	V	P	G	W	CPPC	1	0.000150105
513	CPPC	A	S	K	D	C	K	I	K	K	D	R	C	T	K	K	E	N	CPPC	1	0.000150105
514	CPPC	A	W	S	R	C	V	F	R	A	M	L	C	E	L	W	V	A	CPPC	1	0.000150105
515	CPPC	A	F	L	C	V	L	S	A	R	L	E	C	L	V	R	Y	R	CPPC	1	0.000150105
516	CPPC	G	I	P	C	I	E	C	V	G	E	E	C	S	E	R	S	A	CPPC	1	0.000150105
517	CPPC	G	R	V	P	C	V	I	R	T	Y	S	C	W	L	R	I	R	CPPC	1	0.000150105
518	CPPC	G	L	C	V	R	Y	H	S	R	T	Y	C	A	G	G	V	E	CPPC	1	0.000150105
519	CPPC	G	D	R	C	R	E	K	M	L	C	W	V	L	Q	L	E	L	CPPC	1	0.000150105
520	CPPC	G	F	V	C	S	G	K	Q	W	L	T	C	L	I	S	E	R	CPPC	1	0.000150105
521	CPPC	G	N	L	C	R	L	R	G	F	V	E	C	V	V	F	G	D	CPPC	1	0.000150105
522	CPPC	G	R	C	P	R	A	R	W	W	V	Q	C	V	R	E	L	A	CPPC	1	0.000150105
523	CPPC	G	R	C	P	R	A	M	W	W	V	Q	C	V	R	E	L	A	CPPC	1	0.000150105
524	CPPC	G	R	C	P	R	A	M	W	W	V	Q	C	V	R	E	L	A	CPPC	1	0.000150105
525	CPPC	G	R	F	G	C	P	W	A	E	L	A	C	W	F	T	R	R	CPPC	1	0.000150105
526	CPPC	G	M	C	A	V	I	E	W	S	H	G	C	W	I	W	S	G	CPPC	1	0.000150105
527	CPPC	G	A	V	C	R	S	L	V	R	I	A	C	T	L	G	E	H	CPPC	1	0.000150105
528	CPPC	G	A	E	R	C	A	V	F	A	V	W	W	E	S	L	S	A	CPPC	1	0.000150105
529	CPPC	G	A	E	R	C	S	V	F	A	V	C	W	E	S	L	S	S	CPPC	1	0.000150105
530	CPPC	G	A	E	R	C	S	V	F	A	V	C	G	E	S	L	S	S	CPPC	1	0.000150105
531	CPPC	G	A	C	N	A	Y	Q	R	C	S	C	E	W	L	R	W	F	CPPC	1	0.000150105
532	CPPC	G	G	C	T	R	R	L	G	S	T	Y	C	G	P	S	G	Y	CPPC	1	0.000150105
533	CPPC	G	V	D	C	L	M	G	E	L	C	A	A	L	H	H	S	R	CPPC	1	0.000150105
534	CPPC	G	E	Y	C	I	G	L	I	R	W	V	C	R	H	F	E	H	CPPC	1	0.000150105
535	CPPC	G	S	W	C	H	D	R	M	V	C	A	L	A	H	H	R	E	CPPC	1	0.000150105
536	CPPC	G	W	C	S	V	E	W	W	V	R	L	C	G	L	V	G	L	CPPC	1	0.000150105
537	CPPC	V	K	L	C	W	P	E	Y	G	C	V	C	F	M	L	S	S	CPPC	1	0.000150105
538	CPPC	V	M	A	C	G	L	E	L	V	Y	L	C	T	L	*	A	R	CPPC	1	0.000150105
539	CPPC	V	R	S	P	R	T	E	V	C	W	L	G	F	L	E	G	P	CPPC	1	0.000150105
540	CPPC	V	R	L	C	L	F	P	K	R	C	V	L	I	R	A	W	G	CPPC	1	0.000150105
541	CPPC	V	A	S	C	H	R	A	W	S	S	E	C	V	L	L	G	Q	CPPC	1	0.000150105
542	CPPC	V	V	C	Y	K	W	H	K	C	P	E	W	I	L	T	K	I	CPPC	1	0.000150105
543	CPPC	V	S	R	A	C	R	E	R	T	Q	C	K	L	L	A	W	V	CPPC	1	0.000150105
544	CPPC	V	W	I	C	R	K	P	A	G	E	G	C	E	L	S	G	S	CPPC	1	0.000150105
545	CPPC	V	L	E	C	V	E	A	M	W	F	G	C	S	W	M	V	H	CPPC	1	0.000150105
546	CPPC	V	S	C	C	E	W	S	G	S	L	W	C	K	G	L	S	S	CPPC	1	0.000150105
547	CPPC	V	M	C	A	V	I	E	W	S	H	G	C	W	I	W	S	G	CPPC	1	0.000150105
548	CPPC	V	P	V	C	A	T	R	L	L	R	M	C	V	R	L	E	L	CPPC	1	0.000150105
549	CPPC	V	L	C	L	L	L	P	S	E	F	G	C	S	R	W	W	W	CPPC	1	0.000150105
550	CPPC	V	L	C	L	L	L	P	S	E	F	G	C	I	R	W	W	W	CPPC	1	0.000150105
551	CPPC	V	A	C	S	R	W	L	E	T	Q	L	C	A	W	L	R	L	CPPC	1	0.000150105
552	CPPC	V	S	L	W	C	F	L	A	S	K	K	C	R	R	A	P	R	CPPC	1	0.000150105
553	CPPC	E	H	F	L	C	V	V	V	E	Q	L	C	N	I	L	G	A	CPPC	1	0.000150105
554	CPPC	E	R	T	W	C	L	L	M	R	L	H	C	I	H	R	G	R	CPPC	1	0.000150105
555	CPPC	E	L	C	S	R	R	L	Y	C	G	S	A	I	G	R	L	L	CPPC	1	0.000150105
556	CPPC	E	G	F	N	C	T	N	R	R	V	C	T	R	A	L	N	R	CPPC	1	0.000150105
557	CPPC	E	Y	C	H	S	G	E	S	T	F	W	C	Y	W	E	A	L	CPPC	1	0.000150105
558	CPPC	E	S	C	T	S	G	V	T	W	L	W	C	R	V	F	R	S	CPPC	1	0.000150105
559	CPPC	E	S	S	H	S	G	E	S	T	F	W	C	Y	W	D	A	L	CPPC	1	0.000150105
560	CPPC	E	S	Q	T	C	G	S	F	L	G	C	W	A	E	L	A	S	CPPC	1	0.000150105
561	CPPC	E	S	Q	T	C	V	S	C	L	G	C	W	A	E	L	A	S	CPPC	1	0.000150105
562	CPPC	E	S	Q	T	C	V	S	L	L	G	C	W	A	E	L	A	S	CPPC	1	0.000150105
563	CPPC	E	S	Q	T	C	V	S	F	P	G	C	W	A	E	L	A	S	CPPC	1	0.000150105
564	CPPC	E	S	Q	T	C	V	S	F	R	G	C	W	A	E	L	A	S	CPPC	1	0.000150105
565	CPPC	E	S	Q	T	C	V	S	F	L	R	C	W	A	E	L	A	S	CPPC	1	0.000150105
566	CPPC	E	S	Q	T	C	V	S	F	L	G	S	W	A	E	L	A	S	CPPC	1	0.000150105
567	CPPC	E	S	Q	T	C	V	S	F	L	G	G	W	A	E	L	A	S	CPPC	1	0.000150105
568	CPPC	E	S	Q	T	C	V	S	F	L	G	C	R	A	E	L	A	S	CPPC	1	0.000150105
569	CPPC	E	S	Q	T	C	V	S	F	L	G	C	W	A	E	L	A	S	CPPC	1	0.000150105
570	CPPC	E	S	Q	T	C	V	S	F	L	G	C	W	A	E	L	A	S	CPPC	1	0.000150105
571	CPPC	E	S	Q	T	C	V	S	F	L	G	C	W	A	E	L	A	S	CPPC	1	0.000150105
572	CPPC	E	S	Q	T	C	V	S	F	L	G	C	W	A	E	L	S	S	CPPC	1	0.000150105
573	CPPC	E	S	Q	T	C	V	S	F	L	G	C	W	A	E	F	A	S	CPPC	1	0.000150105
574	CPPC	E	S	Q	T	C	V	S	F	L	G	C	W	A	V	L	A	S	CPPC	1	0.000150105
575	CPPC	E	S	Q	T	C	V	S	F	L	G	C	W	A	V	L	A	S	CPPC	1	0.000150105
576	CPPC	E	S	Q	T	C	V	L	F	L	G	C	W	A	E	L	A	S	CPPC	1	0.000150105
577	CPPC	E	S	Q	T	W	V	S	F	L	G	C	W	A	E	L	A	S	CPPC	1	0.000150105
578	CPPC	E	S	L	T	S	V	S	F	L	G	C	W	A	E	L	A	S	CPPC	1	0.000150105
579	CPPC	E	S	L	T	C	V	S	F	L	G	C	W	A	E	L	A	S	CPPC	1	0.000150105
580	CPPC	E	S	E	T	C	V	S	F	L	G	C	W	A	E	L	A	S	CPPC	1	0.000150105
581	CPPC	E	S	G	H	S	G	E	S	T	F	G	C	Y	W	E	A	L	CPPC	1	0.000150105
582	CPPC	E	S	G	H	S	G	E	S	T	F	W	C	Y	W	E	A	L	CPPC	1	0.000150105
583	CPPC	E	S	*	H	S	G	E	S	T	F	W	C	Y	W	E	A	L	CPPC	1	0.000150105
584	CPPC	E	S	C	H	S	G	E	S	T	C	W	C	Y	W	E	A	L	CPPC	1	0.000150105
585	CPPC	E	S	C	H	S	G	E	S	T	C	W	C	D	W	E	A	L	CPPC	1	0.000150105
586	CPPC	E	S	C	R	S	G	E	S	T	F	W	C	Y	W	E	A	L	CPPC	1	0.000150105
587	CPPC	E	S	C	D	S	G	E	S	T	F	W	C	Y	W	E	A	L	CPPC	1	0.000150105
588	CPPC	E	S	W	H	S	G	E	S	T	F	W	C	Y	W	E	A	L	CPPC	1	0.000150105
589	CPPC	E	W	W	Y	C	N	W	H	R	R	L	C	T	M	I	N	K	CPPC	1	0.000150105
590	CPPC	E	F	S	L	C	L	R	A	T	R	V	C	I	V	S	R	R	CPPC	1	0.000150105
591	CPPC	E	F	C	L	P	L	A	L	C	R	L	L	R	V	W	G	R	CPPC	1	0.000150105
592	CPPC	Y	K	I	C	E	W	N	S	V	C	L	Y	S	A	P	A	A	CPPC	1	0.000150105
593	CPPC	Y	A	I	V	C	L	T	E	L	W	R	C	L	F	W	R	G	CPPC	1	0.000150105
594	CPPC	Y	G	V	G	C	G	H	R	V	E	L	W	R	G	D	I	M	CPPC	1	0.000150105
595	CPPC	Y	G	L	L	C	M	I	D	A	G	L	C	L	E	W	P	W	CPPC	1	0.000150105
596	CPPC	Y	V	C	T	S	P	G	R	V	L	M	C	F	R	E	R	S	CPPC	1	0.000150105
597	CPPC	Y	S	V	R	C	I	T	E	W	W	I	C	R	S	R	A	R	CPPC	1	0.000150105
598	CPPC	Y	S	C	H	S	G	E	S	T	F	W	C	Y	W	E	A	L	CPPC	1	0.000150105
599	CPPC	Y	L	W	L	C	V	W	R	C	S	Q	C	H	E	S	S	E	CPPC	1	0.000150105
600	CPPC	S	T	T	C	G	A	S	R	F	W	F	C	V	Y	E	W	S	CPPC	1	0.000150105
601	CPPC	S	P	C	E	S	R	V	W	C	Y	L	L	S	E	F	P	W	CPPC	1	0.000150105
602	CPPC	S	P	R	G	C	G	R	V	S	Q	E	C	I	N	W	T	P	CPPC	1	0.000150105
603	CPPC	S	R	V	C	S	K	L	L	A	V	L	C	R	S	R	A	W	CPPC	1	0.000150105
604	CPPC	S	L	G	C	P	R	H	N	S	C	D	E	S	V	C	V	S	CPPC	1	0.000150105
605	CPPC	S	L	V	C	K	L	W	S	R	L	T	C	L	G	E	R	A	CPPC	1	0.000150105
606	CPPC	S	L	C	C	V	I	C	L	D	G	E	C	R	T	G	R	A	CPPC	1	0.000150105
607	CPPC	S	D	K	C	L	V	V	D	E	D	G	C	A	L	S	Y	V	CPPC	1	0.000150105
608	CPPC	S	D	N	C	L	G	V	D	E	D	G	C	A	L	S	Y	V	CPPC	1	0.000150105
609	CPPC	S	D	N	C	L	V	G	D	E	D	G	C	A	L	S	Y	V	CPPC	1	0.000150105
610	CPPC	S	D	N	C	L	V	V	D	K	D	G	C	A	L	S	Y	V	CPPC	1	0.000150105
611	CPPC	S	D	N	C	L	V	V	D	E	D	G	C	G	L	S	Y	V	CPPC	1	0.000150105
612	CPPC	S	D	N	C	L	V	V	D	S	D	G	C	A	L	S	Y	V	CPPC	1	0.000150105
613	CPPC	S	D	W	Y	C	C	V	K	W	E	C	L	R	V	L	R	Y	CPPC	1	0.000150105
614	CPPC	S	A	C	R	M	R	C	V	C	G	E	W	L	R	R	G	P	CPPC	1	0.000150105
615	CPPC	S	G	R	W	C	E	E	I	N	R	I	C	I	H	W	R	V	CPPC	1	0.000150105
616	CPPC	S	E	P	L	C	L	R	R	I	W	F	C	V	M	E	T	R	CPPC	1	0.000150105
617	CPPC	S	E	C	A	V	A	L	W	H	W	L	C	W	G	L	I	T	CPPC	1	0.000150105
618	CPPC	S	S	I	R	C	L	V	R	W	G	T	C	W	M	R	F	E	CPPC	1	0.000150105
619	CPPC	S	S	C	H	S	G	E	S	T	F	W	C	Y	W	E	A	L	CPPC	1	0.000150105
620	CPPC	S	L	L	C	P	L	F	W	R	E	L	C	F	T	W	E	P	CPPC	1	0.000150105
621	CPPC	S	T	W	C	I	K	R	L	M	L	V	C	R	W	V	M	R	CPPC	1	0.000150105
622	CPPC	S	P	K	R	C	W	E	C	S	Y	C	C	G	C	R	V	E	CPPC	1	0.000150105
623	CPPC	S	R	H	T	C	L	H	D	L	R	E	C	W	L	I	I	V	CPPC	1	0.000150105
624	CPPC	S	G	L	D	C	L	E	R	V	W	R	C	W	R	Q	E	K	CPPC	1	0.000150105
625	CPPC	S	C	E	C	L	V	R	V	G	R	W	C	G	C	M	G	E	CPPC	1	0.000150105
626	CPPC	W	S	C	E	H	R	L	L	R	S	V	C	D	W	Y	R	Q	CPPC	1	0.000150105
627	CPPC	W	P	H	G	C	G	L	T	G	L	H	C	W	L	R	R	E	CPPC	1	0.000150105
628	CPPC	W	L	L	E	C	L	L	S	T	Q	C	E	Y	V	R	G	S	CPPC	1	0.000150105
629	CPPC	W	L	Y	C	D	L	T	A	A	A	V	C	E	W	N	L	S	CPPC	1	0.000150105
630	CPPC	W	G	W	C	L	S	A	K	W	Y	E	C	V	L	R	G	V	CPPC	1	0.000150105
631	CPPC	W	V	V	C	A	L	R	R	A	C	I	M	L	H	L	R	E	CPPC	1	0.000150105
632	CPPC	W	S	C	A	P	L	L	M	F	V	W	C	R	L	E	R	S	CPPC	1	0.000150105
633	CPPC	W	S	C	H	A	E	F	A	R	Y	W	C	L	V	I	Y	G	CPPC	1	0.000150105
634	CPPC	W	S	C	P	W	W	P	G	C	W	L	A	P	N	E	S	I	CPPC	1	0.000150105
635	CPPC	C	R	E	C	M	G	L	I	C	V	V	C	V	L	M	R	L	CPPC	1	0.000150105
636	CPPC	C	R	E	C	M	G	L	I	C	V	V	C	V	L	M	R	L	CPPC	1	0.000150105
637	CPPC	C	P	Y	A	C	A	G	M	P	Y	L	C	R	I	G	E	C	CPPC	1	0.000150105
638	CPPC	C	Y	R	F	C	E	R	F	V	R	L	C	R	P	M	V	V	CPPC	1	0.000150105
639	CPPC	X	S	S	H	S	G	X	S	T	F	W	C	Y	W	E	A	L	CPPC	1	0.000150105
640	CPPC	L	K	C	H	T	K	P	N	M	K	K	C	E	K	R	C	K	CPPC	1	0.000150105
641	CPPC	L	R	Y	C	R	F	T	A	E	G	E	C	L	E	M	I	T	CPPC	1	0.000150105
642	CPPC	L	P	R	S	C	S	S	I	W	A	G	C	R	W	L	G	E	CPPC	1	0.000150105
643	CPPC	L	R	T	C	D	W	W	T	M	H	W	C	E	R	L	H	W	CPPC	1	0.000150105
644	CPPC	L	V	E	C	G	F	L	W	Q	A	L	C	A	F	M	H	R	CPPC	1	0.000150105
645	CPPC	L	Y	C	W	G	S	M	Y	C	E	Y	E	H	W	N	T	Y	CPPC	1	0.000150105
646	CPPC	L	S	E	C	L	L	S	A	L	C	H	L	F	P	I	A	V	CPPC	1	0.000150105
647	CPPC	L	S	C	E	W	Y	P	L	C	V	*	L	V	L	P	W	T	CPPC	1	0.000150105
648	CPPC	L	S	C	H	S	G	E	S	T	V	W	C	Y	W	E	A	L	CPPC	1	0.000150105
649	CPPC	F	R	W	S	C	L	E	H	L	A	L	C	R	W	R	W	T	CPPC	1	0.000150105
650	CPPC	F	R	W	S	C	L	E	H	L	A	L	C	R	W	M	W	T	CPPC	1	0.000150105
651	CPPC	F	S	R	C	V	S	F	V	E	C	W	M	G	V	I	E	S	CPPC	1	0.000150105
652	CPPC	F	S	R	G	V	S	F	V	E	C	W	M	G	V	I	E	S	CPPC	1	0.000150105
653	CPPC	F	S	R	S	V	S	F	V	E	C	W	M	G	V	I	E	S	CPPC	1	0.000150105
654	CPPC	F	S	R	C	G	S	C	V	E	C	W	M	G	V	I	E	S	CPPC	1	0.000150105
655	CPPC	F	S	R	C	V	S	C	V	E	C	W	M	G	V	I	E	S	CPPC	1	0.000150105
656	CPPC	F	S	R	C	V	S	L	V	E	C	W	M	G	V	I	E	S	CPPC	1	0.000150105
657	CPPC	F	S	R	C	V	S	F	G	E	C	W	M	G	V	I	E	S	CPPC	1	0.000150105
658	CPPC	F	S	R	C	V	S	F	V	E	C	W	M	G	V	M	E	S	CPPC	1	0.000150105
659	CPPC	F	I	F	C	E	L	P	S	W	I	S	C	R	R	Y	W	F	CPPC	1	0.000150105
660	CPPC	F	P	C	H	E	L	G	R	I	L	L	C	L	A	L	Q	E	CPPC	1	0.000150105
661	CPPC	F	P	C	H	E	L	G	R	I	L	L	C	L	A	L	Q	E	CPPC	1	0.000150105
662	CPPC	F	L	G	W	C	P	L	E	L	R	K	C	R	I	P	T	V	CPPC	1	0.000150105
663	CPPC	F	A	S	C	L	S	F	L	E	H	I	C	E	R	W	F	E	CPPC	1	0.000150105
664	CPPC	F	V	C	K	L	Y	S	E	C	F	H	L	S	I	A	L	M	CPPC	1	0.000150105
665	CPPC	F	S	V	H	C	L	K	A	S	V	L	C	G	L	R	V	E	CPPC	1	0.000150105
666	CPPC	F	F	R	C	T	E	R	W	Y	A	I	C	E	G	I	G	A	CPPC	1	0.000150105
667	CPPC	F	F	C	G	I	V	G	L	C	C	P	A	W	S	V	D	E	CPPC	1	0.000150105
668	CPPC	S	D	N	C	L	V	V	D	E	D	G	C	A	L	S	Y	V	CPPC	1	0.000150105
669	CPPC	P	C	L	C	E	M	G	L	L	C	H	P	E	V	G	A	G	CPPC	1	0.000150105
670	CPPC	P	A	L	C	N	R	V	E	E	C	P	T	R	A	L	T	R	CPPC	1	0.000150105
671	CPPC	R	A	L	C	T	R	E	H	G	C	G	T	L	V	E	L	M	CPPC	1	0.000150105
672	CPPC	E	A	G	C	L	L	W	H	P	C	E	L	G	F	E	W	S	CPPC	1	0.000150105
673	CPPC	K	N	R	L	W	C	E	F	A	S	R	C	V	V	M	R	S	CPPC	1	0.000150105
674	CPPC	T	I	T	I	D	C	T	H	G	N	V	C	L	E	V	S	V	CPPC	1	0.000150105
675	CPPC	T	M	P	I	M	C	R	I	S	I	E	C	F	I	R	R	Q	CPPC	1	0.000150105
676	CPPC	R	I	T	I	D	C	T	H	G	N	V	C	L	D	V	S	V	CPPC	1	0.000150105
677	CPPC	S	R	R	H	W	C	I	I	N	E	L	C	M	G	T	C	S	CPPC	1	0.000150105
678	CPPC	S	S	E	E	Y	C	H	V	S	H	T	C	M	T	S	W	L	CPPC	1	0.000150105
679	CPPC	M	K	T	F	R	C	P	N	M	W	L	C	W	W	D	F	E	CPPC	1	0.000150105
680	CPPC	M	T	V	W	E	C	W	T	R	L	L	C	D	R	P	T	S	CPPC	1	0.000150105
681	CPPC	M	T	Y	W	E	C	W	T	R	L	L	C	D	R	P	T	S	CPPC	1	0.000150105
682	CPPC	M	T	L	W	E	C	W	T	R	L	L	C	D	R	P	T	S	CPPC	1	0.000150105
683	CPPC	M	T	F	W	E	C	W	T	R	L	V	C	D	R	P	T	S	CPPC	1	0.000150105
684	CPPC	M	T	F	W	E	C	W	T	R	L	L	C	D	R	P	T	R	CPPC	1	0.000150105
685	CPPC	M	T	F	W	E	C	W	T	R	L	L	C	D	R	P	T	S	CPPC	1	0.000150105
686	CPPC	M	L	L	W	E	C	V	M	F	R	I	C	E	P	E	F	T	CPPC	1	0.000150105
687	CPPC	M	L	A	E	I	C	L	N	E	L	T	C	L	F	E	L	N	CPPC	1	0.000150105
688	CPPC	I	K	W	R	T	C	L	S	R	L	L	C	S	Y	L	G	E	CPPC	1	0.000150105
689	CPPC	I	T	G	V	I	C	K	L	L	P	I	C	G	E	R	K	T	CPPC	1	0.000150105
690	CPPC	I	I	L	V	L	C	Y	Y	I	G	E	C	P	A	E	F	T	CPPC	1	0.000150105
691	CPPC	I	Q	S	A	P	C	L	K	R	G	P	C	L	G	V	Y	E	CPPC	1	0.000150105
692	CPPC	I	Q	S	I	E	C	W	M	P	Y	F	C	A	H	V	T	T	CPPC	1	0.000150105
693	CPPC	I	H	M	V	L	C	P	L	I	R	P	C	E	R	L	G	M	CPPC	1	0.000150105
694	CPPC	H	K	W	F	R	C	G	S	F	K	G	C	L	G	A	V	E	CPPC	1	0.000150105
695	CPPC	H	K	W	F	R	C	W	S	F	K	G	C	L	G	A	V	E	CPPC	1	0.000150105
696	CPPC	H	I	S	P	E	C	G	S	E	R	P	C	L	M	L	L	G	CPPC	1	0.000150105
697	CPPC	H	R	S	W	L	C	R	L	L	A	R	C	V	E	T	C	A	CPPC	1	0.000150105
698	CPPC	H	E	V	A	P	C	G	R	L	H	L	C	V	E	W	L	K	CPPC	1	0.000150105
699	CPPC	H	S	K	F	R	C	W	T	V	R	Y	C	R	S	A	K	K	CPPC	1	0.000150105
700	CPPC	P	G	W	R	E	C	V	T	R	I	W	C	A	K	L	T	N	CPPC	1	0.000150105
701	CPPC	P	S	A	S	E	C	H	T	L	W	E	C	A	P	A	W	S	CPPC	1	0.000150105
702	CPPC	R	A	F	R	H	C	H	K	W	K	P	C	T	R	V	K	R	CPPC	1	0.000150105
703	CPPC	R	W	R	G	L	C	V	K	H	I	V	C	K	W	S	R	E	CPPC	1	0.000150105
704	CPPC	R	W	S	L	T	C	R	Y	L	L	G	C	W	E	H	Y	I	CPPC	1	0.000150105
705	CPPC	R	W	F	F	F	C	R	S	I	E	G	C	H	S	D	G	I	CPPC	1	0.000150105
706	CPPC	R	H	E	S	R	C	T	R	I	G	R	C	P	P	P	S	L	CPPC	1	0.000150105
707	CPPC	R	E	G	P	G	C	L	Y	W	L	R	C	L	F	H	L	S	CPPC	1	0.000150105
708	CPPC	R	E	G	P	G	W	L	Y	W	L	R	C	L	F	H	L	S	CPPC	1	0.000150105
709	CPPC	R	S	A	R	S	C	V	N	M	Y	W	C	L	Y	A	I	R	CPPC	1	0.000150105
710	CPPC	L	H	L	Q	F	C	T	M	E	S	W	C	V	H	L	F	P	CPPC	1	0.000150105
711	CPPC	L	R	H	H	R	C	R	A	R	N	P	C	A	P	T	C	E	CPPC	1	0.000150105
712	CPPC	L	R	K	W	L	C	D	W	V	I	E	C	L	E	Q	T	G	CPPC	1	0.000150105
713	CPPC	L	L	L	S	E	C	R	K	T	G	E	C	V	D	Q	R	C	CPPC	1	0.000150105
714	CPPC	L	L	A	S	E	C	T	W	N	N	T	C	N	T	S	R	M	CPPC	1	0.000150105
715	CPPC	L	L	C	P	E	C	P	K	F	G	D	C	A	E	Y	T	K	CPPC	1	0.000150105
716	CPPC	L	V	A	S	L	C	E	E	L	L	E	C	A	R	L	V	Y	CPPC	1	0.000150105
717	CPPC	L	L	T	L	A	C	R	R	L	V	Q	C	D	L	H	L	E	CPPC	1	0.000150105
718	CPPC	E	L	E	E	Y	C	H	T	E	S	S	C	V	V	I	M	A	CPPC	1	0.000150105
719	CPPC	E	L	E	L	Y	C	H	T	E	S	S	C	V	V	I	M	A	CPPC	1	0.000150105
720	CPPC	E	L	E	F	P	C	T	S	P	M	Q	C	R	A	P	I	L	CPPC	1	0.000150105
721	CPPC	E	G	K	D	R	C	L	A	E	W	P	C	W	A	H	S	R	CPPC	1	0.000150105
722	CPPC	D	D	F	R	T	C	W	N	L	L	Y	C	H	F	D	Y	E	CPPC	1	0.000150105
723	CPPC	G	N	A	G	E	C	F	L	A	Q	W	C	D	L	G	E	N	CPPC	1	0.000150105
724	CPPC	G	N	A	G	E	C	F	L	A	Q	W	C	D	L	V	E	N	CPPC	1	0.000150105
725	CPPC	G	E	H	L	M	C	L	R	R	R	V	C	I	T	V	I	E	CPPC	1	0.000150105
726	CPPC	V	T	A	E	K	C	L	I	E	L	A	C	E	H	S	H	H	CPPC	1	0.000150105
727	CPPC	V	F	S	F	S	C	T	N	D	W	T	C	H	N	E	H	F	CPPC	1	0.000150105
728	CPPC	V	Q	T	T	K	C	G	T	F	E	E	C	W	F	T	L	M	CPPC	1	0.000150105
729	CPPC	V	L	R	W	L	C	R	H	T	V	L	C	H	A	D	A	E	CPPC	1	0.000150105
730	CPPC	V	A	E	F	W	C	Q	M	I	G	T	C	T	T	E	A	N	CPPC	1	0.000150105
731	CPPC	E	R	R	C	F	C	L	I	L	R	I	C	G	E	P	G	R	CPPC	1	0.000150105
732	CPPC	E	D	S	F	M	C	T	M	L	I	E	C	I	H	T	Y	F	CPPC	1	0.000150105
733	CPPC	E	E	H	W	A	C	P	N	P	F	M	C	F	R	H	T	W	CPPC	1	0.000150105
734	CPPC	E	S	F	D	R	C	G	S	C	L	I	C	R	R	V	L	M	CPPC	1	0.000150105
735	CPPC	Y	H	C	L	L	C	T	W	E	R	F	C	R	L	T	N	I	CPPC	1	0.000150105
736	CPPC	Y	H	C	L	L	C	T	W	E	R	F	C	R	L	T	H	I	CPPC	1	0.000150105
737	CPPC	Y	E	N	I	T	C	V	Y	T	A	F	C	A	E	I	M	F	CPPC	1	0.000150105
738	CPPC	S	T	Y	K	Y	C	H	E	L	M	F	C	A	M	W	W	S	CPPC	1	0.000150105
739	CPPC	S	R	G	N	G	C	V	N	T	Q	E	C	C	A	A	Q	V	CPPC	1	0.000150105
740	CPPC	S	F	R	W	H	C	L	W	T	W	E	C	H	S	E	H	R	CPPC	1	0.000150105
741	CPPC	S	F	R	W	H	C	L	W	P	W	E	C	H	S	E	H	R	CPPC	1	0.000150105
742	CPPC	S	F	R	W	H	C	L	W	P	W	E	C	H	S	E	H	S	CPPC	1	0.000150105
743	CPPC	S	F	R	W	H	C	L	W	P	W	E	C	P	S	E	H	R	CPPC	1	0.000150105
744	CPPC	S	F	R	W	H	C	L	W	R	W	E	C	H	S	E	H	R	CPPC	1	0.000150105
745	CPPC	S	F	R	W	H	C	F	W	P	W	E	C	H	S	E	H	R	CPPC	1	0.000150105
746	CPPC	S	P	K	Q	V	C	V	T	R	R	W	C	Q	E	C	D	L	CPPC	1	0.000150105
747	CPPC	C	L	D	A	T	C	I	R	S	E	R	C	S	N	A	H	E	CPPC	1	0.000150105
748	CPPC	C	L	D	A	T	C	I	M	S	E	R	C	S	N	A	H	E	CPPC	1	0.000150105
749	CPPC	C	D	C	R	K	C	M	L	P	S	E	C	H	S	S	V	H	CPPC	1	0.000150105
750	CPPC	F	A	E	F	W	C	Q	M	I	G	T	C	T	T	E	A	N	CPPC	1	0.000150105
751	CPPC	F	A	E	F	W	W	Q	M	I	G	T	C	T	T	E	A	N	CPPC	1	0.000150105
752	CPPC	F	E	S	Y	T	C	H	F	P	S	I	C	F	F	L	E	T	CPPC	1	0.000150105
753	CPPC	F	E	R	N	Q	C	F	R	C	I	W	C	R	V	T	G	L	CPPC	1	0.000150105
754	CPPC	F	S	T	L	L	C	R	N	A	S	A	C	E	Y	M	M	L	CPPC	1	0.000150105
755	CPPC	T	I	T	I	D	C	T	H	G	N	V	C	L	D	V	S	V	CPPC	1	0.000150105
756	CPPC	E	S	C	Q	S	G	E	S	T	F	W	C	Y	W	E	A	L	CPPC	1	0.000150105
